# Supplementary material for: O-Acetylated Chemical Reporters of Glycosylation Can Display Metabolism-Dependent Background Labeling of Proteins but Are Generally Reliable Tools for the Identification of Glycoproteins
Source: Front Chem. 2020 Apr 28;8:318. doi: 10.3389/fchem.2020.00318 (PMC7198827; doi:10.3389/fchem.2020.00318)
Supplement: Supplementary file 1 [file Table_1.XLSX]

## Sheet: AllProteins
Protein Group	Protein ID	Description	Accession	Significance	Coverage (%)	#Peptides	#Unique	PTM	2AzMan A Sample 1 Intensity	2AzMan B Sample 2 Intensity	2AzMan C Sample 3 Intensity	Null A Sample 4 Intensity	Null B Sample 5 Intensity	Null C Sample 6 Intensity	2AzMan A Sample 1 Intensity (top-3 peptides)	2AzMan B Sample 2 Intensity (top-3 peptides)	2AzMan C Sample 3 Intensity (top-3 peptides)	Null A Sample 4 Intensity (top-3 peptides)	Null B Sample 5 Intensity (top-3 peptides)	Null C Sample 6 Intensity (top-3 peptides)	Sample Profile (Ratio)	2AzMan Intensity	null Intensity	2AzMan Intensity (top-3 peptides)	null Intensity (top-3 peptides)	TOP 3 RATIO	Group Profile (Ratio)	Avg. Mass
386	7315	| cofilin-1 | 1072 | CFL1 | 166 | P23528 | sp	NP_005498	61.63	69	10	10	Carbamidomethylation; Acetylation (Protein N-term)	21110	18457	24427	1154.1	1190.4	1280	12430	11496	12603	1154.1	1190.4	1280	1.00:0.92:1.01:0.09:0.10:0.10	21694	1208.2	12176	1208.2	10.0778	1.00:0.10	18502
1223	7961	| huntingtin-interacting protein 1 isoform 2 | 3092 | HIP1 | 986 | O00291 | sp	NP_001230127	60.23	5	4	4	Carbamidomethylation	1162.2	1226.9	1628.2	345.6	326.01	328.58	1162.2	1226.9	1206.3	345.6	326.01	328.58	1.00:1.06:1.04:0.30:0.28:0.28	1620.4	333.4	1198.5	333.4	3.59478	1.00:0.28	110663
1223	7962	| huntingtin-interacting protein 1 isoform X4 | 3092 | HIP1 | 1003 | nan | nan	XP_005250362	60.23	5	4	4	Carbamidomethylation	1162.2	1226.9	1628.2	345.6	326.01	328.58	1162.2	1226.9	1206.3	345.6	326.01	328.58	1.00:1.06:1.04:0.30:0.28:0.28	1620.4	333.4	1198.5	333.4	3.59478	1.00:0.28	112500
1223	7963	| huntingtin-interacting protein 1 isoform X3 | 3092 | HIP1 | 1008 | O00291 | sp	XP_005250361	60.23	5	4	4	Carbamidomethylation	1162.2	1226.9	1628.2	345.6	326.01	328.58	1162.2	1226.9	1206.3	345.6	326.01	328.58	1.00:1.06:1.04:0.30:0.28:0.28	1620.4	333.4	1198.5	333.4	3.59478	1.00:0.28	113075
1223	7964	| huntingtin-interacting protein 1 isoform X2 | 3092 | HIP1 | 1023 | nan | nan	XP_016867588	60.23	5	4	4	Carbamidomethylation	1162.2	1226.9	1628.2	345.6	326.01	328.58	1162.2	1226.9	1206.3	345.6	326.01	328.58	1.00:1.06:1.04:0.30:0.28:0.28	1620.4	333.4	1198.5	333.4	3.59478	1.00:0.28	114712
1223	7965	| huntingtin-interacting protein 1 isoform 1 | 3092 | HIP1 | 1037 | O00291 | sp	NP_005329	60.23	5	4	4	Carbamidomethylation	1162.2	1226.9	1628.2	345.6	326.01	328.58	1162.2	1226.9	1206.3	345.6	326.01	328.58	1.00:1.06:1.04:0.30:0.28:0.28	1620.4	333.4	1198.5	333.4	3.59478	1.00:0.28	116221
1223	7966	| huntingtin-interacting protein 1 isoform X1 | 3092 | HIP1 | 1037 | O00291 | sp	XP_011514418	60.23	5	4	4	Carbamidomethylation	1162.2	1226.9	1628.2	345.6	326.01	328.58	1162.2	1226.9	1206.3	345.6	326.01	328.58	1.00:1.06:1.04:0.30:0.28:0.28	1620.4	333.4	1198.5	333.4	3.59478	1.00:0.28	116221
75	253	| microtubule-associated protein 4 isoform X28 | 4134 | MAP4 | 1111 | nan | nan	XP_016861900	48.17	36	29	29	Carbamidomethylation; Acetylation (Protein N-term)	39542	35474	38669	633.35	563.33	1113.2	8900	8893.2	9065.5	0	290.3	295.71	1.00:1.00:1.02:0:0.03:0.03	38407	1706	8952.9	586.01	15.2777	1.00:0.07	116816
75	257	| microtubule-associated protein 4 isoform X27 | 4134 | MAP4 | 1113 | nan | nan	XP_016861899	48.17	36	29	29	Carbamidomethylation; Acetylation (Protein N-term)	39542	35474	38669	633.35	563.33	1113.2	8900	8893.2	9065.5	0	290.3	295.71	1.00:1.00:1.02:0:0.03:0.03	38407	1706	8952.9	586.01	15.2777	1.00:0.07	117131
75	258	| microtubule-associated protein 4 isoform X26 | 4134 | MAP4 | 1114 | nan | nan	XP_016861898	48.17	36	29	29	Carbamidomethylation; Acetylation (Protein N-term)	39542	35474	38669	633.35	563.33	1113.2	8900	8893.2	9065.5	0	290.3	295.71	1.00:1.00:1.02:0:0.03:0.03	38407	1706	8952.9	586.01	15.2777	1.00:0.07	117157
75	270	| microtubule-associated protein 4 isoform X22 | 4134 | MAP4 | 1128 | nan | nan	XP_016861890	48.17	36	29	29	Carbamidomethylation; Acetylation (Protein N-term)	39542	35474	38669	633.35	563.33	1113.2	8900	8893.2	9065.5	0	290.3	295.71	1.00:1.00:1.02:0:0.03:0.03	38407	1706	8952.9	586.01	15.2777	1.00:0.07	118649
75	271	| microtubule-associated protein 4 isoform X21 | 4134 | MAP4 | 1129 | nan | nan	XP_024309298	48.17	36	29	29	Carbamidomethylation; Acetylation (Protein N-term)	39542	35474	38669	633.35	563.33	1113.2	8900	8893.2	9065.5	0	290.3	295.71	1.00:1.00:1.02:0:0.03:0.03	38407	1706	8952.9	586.01	15.2777	1.00:0.07	118781
75	273	| microtubule-associated protein 4 isoform X25 | 4134 | MAP4 | 1131 | nan | nan	XP_016861895	48.17	35	29	29	Carbamidomethylation; Acetylation (Protein N-term)	39542	35474	38669	633.35	563.33	1113.2	8900	8893.2	9065.5	0	290.3	295.71	1.00:1.00:1.02:0:0.03:0.03	38407	1706	8952.9	586.01	15.2777	1.00:0.07	118991
75	316	| microtubule-associated protein 4 isoform X18 | 4134 | MAP4 | 1166 | nan | nan	XP_016861885	48.17	34	29	29	Carbamidomethylation; Acetylation (Protein N-term)	39542	35474	38669	633.35	563.33	1113.2	8900	8893.2	9065.5	0	290.3	295.71	1.00:1.00:1.02:0:0.03:0.03	38407	1706	8952.9	586.01	15.2777	1.00:0.07	122412
75	319	| microtubule-associated protein 4 isoform X17 | 4134 | MAP4 | 1169 | nan | nan	XP_024309297	48.17	34	29	29	Carbamidomethylation; Acetylation (Protein N-term)	39542	35474	38669	633.35	563.33	1113.2	8900	8893.2	9065.5	0	290.3	295.71	1.00:1.00:1.02:0:0.03:0.03	38407	1706	8952.9	586.01	15.2777	1.00:0.07	122838
75	333	| microtubule-associated protein 4 isoform X15 | 4134 | MAP4 | 1181 | nan | nan	XP_011532021	48.17	34	29	29	Carbamidomethylation; Acetylation (Protein N-term)	39542	35474	38669	633.35	563.33	1113.2	8900	8893.2	9065.5	0	290.3	295.71	1.00:1.00:1.02:0:0.03:0.03	38407	1706	8952.9	586.01	15.2777	1.00:0.07	123930
653	4908	| protein KRI1 homolog | 65095 | KRI1 | 709 | Q8N9T8 | sp	NP_075384	47.28	11	6	6	Carbamidomethylation	4679.5	3259.9	4530.8	240.67	193.13	226.14	2933.3	2288.6	2798.2	240.67	193.13	226.14	1.00:0.78:0.95:0.08:0.07:0.08	4397.4	443.04	2673.4	443.04	6.03422	1.00:0.17	83252
653	5081	| protein KRI1 homolog isoform X1 | 65095 | KRI1 | 591 | nan | nan	XP_011526492	47.28	13	6	6	Carbamidomethylation	4679.5	3259.9	4530.8	240.67	193.13	226.14	2933.3	2288.6	2798.2	240.67	193.13	226.14	1.00:0.78:0.95:0.08:0.07:0.08	4397.4	443.04	2673.4	443.04	6.03422	1.00:0.17	69424
1290	9492	| 60S ribosomal protein L10a | 4736 | RPL10A | 217 | P62906 | sp	NP_009035	47.12	13	2	2	Carbamidomethylation	2121.2	1807.6	1969	415.63	425.91	477.17	2121.2	1807.6	1969	415.63	425.91	477.17	1.00:0.85:0.93:0.20:0.20:0.22	1965.9	439.57	1965.9	439.57	4.47233	1.00:0.22	24831
398	2289	| deoxynucleotidyltransferase terminal-interacting protein 2 | 30836 | DNTTIP2 | 756 | Q5QJE6 | sp	NP_055412	46.75	26	14	14	Carbamidomethylation	15404	14496	19252	324.06	405.64	303	6004	4904.9	6244.7	324.06	405.64	303	1.00:0.82:1.04:0.05:0.07:0.05	16658	667.84	5717.9	667.84	8.56178	1.00:0.12	84469
43	141	| heat shock protein 105 kDa isoform 2 | 10808 | HSPH1 | 814 | Q92598 | sp	NP_001273432	46.35	17	11	11	Carbamidomethylation	12156	10075	12915	1187.3	1351.4	1431.7	8227.2	7222.2	7139.8	1187.3	1351.4	1431.7	1.00:0.88:0.87:0.14:0.16:0.17	13110	1431.1	7529.7	1431.1	5.26148	1.00:0.19	92116
43	186	| heat shock protein 105 kDa isoform X4 | 10808 | HSPH1 | 807 | nan | nan	XP_016875852	46.35	17	11	11	Carbamidomethylation	12156	10075	12915	1187.3	1351.4	1431.7	8227.2	7222.2	7139.8	1187.3	1351.4	1431.7	1.00:0.88:0.87:0.14:0.16:0.17	13110	1431.1	7529.7	1431.1	5.26148	1.00:0.19	91245
43	194	| heat shock protein 105 kDa isoform 1 | 10808 | HSPH1 | 858 | Q92598 | sp	NP_006635	46.35	16	11	11	Carbamidomethylation	12156	10075	12915	1187.3	1351.4	1431.7	8227.2	7222.2	7139.8	1187.3	1351.4	1431.7	1.00:0.88:0.87:0.14:0.16:0.17	13110	1431.1	7529.7	1431.1	5.26148	1.00:0.19	96865
43	250	| heat shock protein 105 kDa isoform 5 | 10808 | HSPH1 | 851 | nan | nan	NP_001336633	46.35	17	11	11	Carbamidomethylation	12156	10075	12915	1187.3	1351.4	1431.7	8227.2	7222.2	7139.8	1187.3	1351.4	1431.7	1.00:0.88:0.87:0.14:0.16:0.17	13110	1431.1	7529.7	1431.1	5.26148	1.00:0.19	95994
522	4951	| src substrate cortactin isoform b | 2017 | CTTN | 513 | Q14247 | sp	NP_612632	46.24	27	10	10		9834.8	8962.6	8525.4	413.4	409.13	434.6	4413.6	4086.6	4688.8	413.4	409.13	434.6	1.00:0.93:1.06:0.09:0.09:0.10	9297.8	419.04	4396.4	419.04	10.4916	1.00:0.10	57467
522	4952	| src substrate cortactin isoform a | 2017 | CTTN | 550 | Q14247 | sp	NP_005222	46.24	25	10	10		9834.8	8962.6	8525.4	413.4	409.13	434.6	4413.6	4086.6	4688.8	413.4	409.13	434.6	1.00:0.93:1.06:0.09:0.09:0.10	9297.8	419.04	4396.4	419.04	10.4916	1.00:0.10	61586
522	4978	| src substrate cortactin isoform X1 | 2017 | CTTN | 476 | nan | nan	XP_006718510	46.24	29	10	10		9834.8	8962.6	8525.4	413.4	409.13	434.6	4413.6	4086.6	4688.8	413.4	409.13	434.6	1.00:0.93:1.06:0.09:0.09:0.10	9297.8	419.04	4396.4	419.04	10.4916	1.00:0.10	53207
623	6159	| TAR DNA-binding protein 43 isoform X1 | 23435 | TARDBP | 414 | Q13148 | sp	XP_016856355	45.62	18	5	5		6654.4	5784.3	7259.8	645.77	395.17	463.82	5355.5	4599.5	5871.8	416.55	395.17	463.82	1.00:0.86:1.10:0.08:0.07:0.09	6566.1	654.4	5275.6	425.18	12.4079	1.00:0.08	44740
623	6160	| TAR DNA-binding protein 43 | 23435 | TARDBP | 414 | Q13148 | sp	NP_031401	45.62	18	5	5		6654.4	5784.3	7259.8	645.77	395.17	463.82	5355.5	4599.5	5871.8	416.55	395.17	463.82	1.00:0.86:1.10:0.08:0.07:0.09	6566.1	654.4	5275.6	425.18	12.4079	1.00:0.08	44740
623	6161	| TAR DNA-binding protein 43 isoform X1 | 23435 | TARDBP | 414 | Q13148 | sp	XP_016856353	45.62	18	5	5		6654.4	5784.3	7259.8	645.77	395.17	463.82	5355.5	4599.5	5871.8	416.55	395.17	463.82	1.00:0.86:1.10:0.08:0.07:0.09	6566.1	654.4	5275.6	425.18	12.4079	1.00:0.08	44740
623	6162	| TAR DNA-binding protein 43 isoform X1 | 23435 | TARDBP | 414 | Q13148 | sp	XP_016856352	45.62	18	5	5		6654.4	5784.3	7259.8	645.77	395.17	463.82	5355.5	4599.5	5871.8	416.55	395.17	463.82	1.00:0.86:1.10:0.08:0.07:0.09	6566.1	654.4	5275.6	425.18	12.4079	1.00:0.08	44740
623	6163	| TAR DNA-binding protein 43 isoform X1 | 23435 | TARDBP | 414 | Q13148 | sp	XP_016856357	45.62	18	5	5		6654.4	5784.3	7259.8	645.77	395.17	463.82	5355.5	4599.5	5871.8	416.55	395.17	463.82	1.00:0.86:1.10:0.08:0.07:0.09	6566.1	654.4	5275.6	425.18	12.4079	1.00:0.08	44740
623	6164	| TAR DNA-binding protein 43 isoform X1 | 23435 | TARDBP | 414 | Q13148 | sp	XP_016856356	45.62	18	5	5		6654.4	5784.3	7259.8	645.77	395.17	463.82	5355.5	4599.5	5871.8	416.55	395.17	463.82	1.00:0.86:1.10:0.08:0.07:0.09	6566.1	654.4	5275.6	425.18	12.4079	1.00:0.08	44740
623	6165	| TAR DNA-binding protein 43 isoform X1 | 23435 | TARDBP | 414 | Q13148 | sp	XP_016856354	45.62	18	5	5		6654.4	5784.3	7259.8	645.77	395.17	463.82	5355.5	4599.5	5871.8	416.55	395.17	463.82	1.00:0.86:1.10:0.08:0.07:0.09	6566.1	654.4	5275.6	425.18	12.4079	1.00:0.08	44740
796	6264	| signal recognition particle receptor subunit beta | 58477 | SRPRB | 271 | Q9Y5M8 | sp	NP_067026	45.44	31	6	6	Carbamidomethylation	6998.9	6094.6	6998.5	355.27	280.42	531.39	4612.4	3985.2	4516.5	355.27	280.42	294.36	1.00:0.86:0.98:0.08:0.06:0.06	6697.3	842.27	4371.4	605.23	7.22271	1.00:0.14	29702
44	25	| T-complex protein 1 subunit beta isoform 1 | 10576 | CCT2 | 535 | P78371 | sp	NP_006422	45.16	67	28	28	Carbamidomethylation; Acetylation (Protein N-term); Oxidation (M)	63912	60247	66172	2859.5	2758.2	2534.8	16620	17026	19135	793.22	983.47	998.77	1.00:1.02:1.15:0.05:0.06:0.06	64194	3037.1	17594	925.15	19.0175	1.00:0.05	57488
30	59	| lamin isoform A | 4000 | LMNA | 664 | P02545 | sp	NP_733821	44.18	7	2	2		9846.6	7835.1	10252	942.33	692.34	794.13	9846.6	7835.1	10252	942.33	692.34	794.13	1.00:0.80:1.04:0.10:0.07:0.08	9311.2	1093.5	9311.2	1093.5	8.51504	1.00:0.12	74140
954	6252	| ubiquitin-associated protein 2 isoform 1 | 55833 | UBAP2 | 1119 | Q5T6F2 | sp	NP_060919	43.7	11	7	7		5060.4	4872.6	3343.2	0	0	0	3736.9	3189.5	1550.1	0	0	0	1.00:0.85:0.41:0:0:0	4582.3	0	2825.5	0	#DIV/0!	1.00:0	117144
488	4543	| heme oxygenase 2 isoform X2 | 3163 | HMOX2 | 316 | P30519 | sp	XP_016878685	43.54	40	9	9	Acetylation (Protein N-term)	5254.1	3531.5	7142.8	0	0	0	2879.3	1450.6	3436.5	0	0	0	1.00:0.50:1.19:0:0:0	6328.3	0	3030	0	#DIV/0!	1.00:0	36033
488	4544	| heme oxygenase 2 isoform b | 3163 | HMOX2 | 316 | P30519 | sp	NP_001120677	43.54	40	9	9	Acetylation (Protein N-term)	5254.1	3531.5	7142.8	0	0	0	2879.3	1450.6	3436.5	0	0	0	1.00:0.50:1.19:0:0:0	6328.3	0	3030	0	#DIV/0!	1.00:0	36033
488	4545	| heme oxygenase 2 isoform X2 | 3163 | HMOX2 | 316 | P30519 | sp	XP_016878686	43.54	40	9	9	Acetylation (Protein N-term)	5254.1	3531.5	7142.8	0	0	0	2879.3	1450.6	3436.5	0	0	0	1.00:0.50:1.19:0:0:0	6328.3	0	3030	0	#DIV/0!	1.00:0	36033
488	4546	| heme oxygenase 2 isoform b | 3163 | HMOX2 | 316 | P30519 | sp	NP_001120678	43.54	40	9	9	Acetylation (Protein N-term)	5254.1	3531.5	7142.8	0	0	0	2879.3	1450.6	3436.5	0	0	0	1.00:0.50:1.19:0:0:0	6328.3	0	3030	0	#DIV/0!	1.00:0	36033
488	4547	| heme oxygenase 2 isoform b | 3163 | HMOX2 | 316 | P30519 | sp	NP_002125	43.54	40	9	9	Acetylation (Protein N-term)	5254.1	3531.5	7142.8	0	0	0	2879.3	1450.6	3436.5	0	0	0	1.00:0.50:1.19:0:0:0	6328.3	0	3030	0	#DIV/0!	1.00:0	36033
488	4548	| heme oxygenase 2 isoform b | 3163 | HMOX2 | 316 | P30519 | sp	NP_001273198	43.54	40	9	9	Acetylation (Protein N-term)	5254.1	3531.5	7142.8	0	0	0	2879.3	1450.6	3436.5	0	0	0	1.00:0.50:1.19:0:0:0	6328.3	0	3030	0	#DIV/0!	1.00:0	36033
488	4549	| heme oxygenase 2 isoform b | 3163 | HMOX2 | 316 | P30519 | sp	NP_001273199	43.54	40	9	9	Acetylation (Protein N-term)	5254.1	3531.5	7142.8	0	0	0	2879.3	1450.6	3436.5	0	0	0	1.00:0.50:1.19:0:0:0	6328.3	0	3030	0	#DIV/0!	1.00:0	36033
488	4550	| heme oxygenase 2 isoform b | 3163 | HMOX2 | 316 | P30519 | sp	NP_001273197	43.54	40	9	9	Acetylation (Protein N-term)	5254.1	3531.5	7142.8	0	0	0	2879.3	1450.6	3436.5	0	0	0	1.00:0.50:1.19:0:0:0	6328.3	0	3030	0	#DIV/0!	1.00:0	36033
488	4551	| heme oxygenase 2 isoform X2 | 3163 | HMOX2 | 316 | nan | nan	XP_024306018	43.54	40	9	9	Acetylation (Protein N-term)	5254.1	3531.5	7142.8	0	0	0	2879.3	1450.6	3436.5	0	0	0	1.00:0.50:1.19:0:0:0	6328.3	0	3030	0	#DIV/0!	1.00:0	36033
488	4552	| heme oxygenase 2 isoform b | 3163 | HMOX2 | 316 | P30519 | sp	NP_001120676	43.54	40	9	9	Acetylation (Protein N-term)	5254.1	3531.5	7142.8	0	0	0	2879.3	1450.6	3436.5	0	0	0	1.00:0.50:1.19:0:0:0	6328.3	0	3030	0	#DIV/0!	1.00:0	36033
869	3574	| constitutive coactivator of PPAR-gamma-like protein 1 isoform X4 | 23196 | FAM120A | 1117 | nan | nan	XP_005251899	42.93	9	7	7	Carbamidomethylation	3715.6	3284.2	4260.8	227.41	0	587.62	1973.2	2050.1	2339.2	227.41	0	242.73	1.00:1.04:1.19:0.12:0:0.12	3925.5	579.96	2120.8	235.07	9.02199	1.00:0.11	121831
869	3575	| constitutive coactivator of PPAR-gamma-like protein 1 isoform b | 23196 | FAM120A | 1117 | Q9NZB2 | sp	NP_001273651	42.93	9	7	7	Carbamidomethylation	3715.6	3284.2	4260.8	227.41	0	587.62	1973.2	2050.1	2339.2	227.41	0	242.73	1.00:1.04:1.19:0.12:0:0.12	3925.5	579.96	2120.8	235.07	9.02199	1.00:0.11	121817
869	3576	| constitutive coactivator of PPAR-gamma-like protein 1 isoform a | 23196 | FAM120A | 1118 | Q9NZB2 | sp	NP_055427	42.93	9	7	7	Carbamidomethylation	3715.6	3284.2	4260.8	227.41	0	587.62	1973.2	2050.1	2339.2	227.41	0	242.73	1.00:1.04:1.19:0.12:0:0.12	3925.5	579.96	2120.8	235.07	9.02199	1.00:0.11	121888
869	3577	| constitutive coactivator of PPAR-gamma-like protein 1 isoform X2 | 23196 | FAM120A | 1145 | nan | nan	XP_011516715	42.93	9	7	7	Carbamidomethylation	3715.6	3284.2	4260.8	227.41	0	587.62	1973.2	2050.1	2339.2	227.41	0	242.73	1.00:1.04:1.19:0.12:0:0.12	3925.5	579.96	2120.8	235.07	9.02199	1.00:0.11	125215
869	3578	| constitutive coactivator of PPAR-gamma-like protein 1 isoform X3 | 23196 | FAM120A | 1145 | nan | nan	XP_011516716	42.93	9	7	7	Carbamidomethylation	3715.6	3284.2	4260.8	227.41	0	587.62	1973.2	2050.1	2339.2	227.41	0	242.73	1.00:1.04:1.19:0.12:0:0.12	3925.5	579.96	2120.8	235.07	9.02199	1.00:0.11	125201
869	3579	| constitutive coactivator of PPAR-gamma-like protein 1 isoform X1 | 23196 | FAM120A | 1146 | Q9NZB2 | sp	XP_011516714	42.93	9	7	7	Carbamidomethylation	3715.6	3284.2	4260.8	227.41	0	587.62	1973.2	2050.1	2339.2	227.41	0	242.73	1.00:1.04:1.19:0.12:0:0.12	3925.5	579.96	2120.8	235.07	9.02199	1.00:0.11	125272
585	3807	| dihydropyrimidinase-related protein 3 isoform 1 | 1809 | DPYSL3 | 684 | Q14195 | sp	NP_001184223	42.47	21	9	9	Carbamidomethylation	4075.9	3215	3589.6	0	282.13	504.9	1804	1587.3	1827.3	0	282.13	266.3	1.00:0.88:1.01:0:0.16:0.15	3798.7	787.03	1739.5	548.43	3.17178	1.00:0.32	73911
1051	8707	| nucleoporin NUP53 isoform X2 | 129401 | NUP35 | 309 | Q8NFH5 | sp	XP_011508878	42.44	20	4	4		1972.4	940.23	2396.4	0	0	0	1790.4	940.23	2155.9	0	0	0	1.00:0.53:1.20:0:0:0	2307.9	0	2096.6	0	#DIV/0!	1.00:0	33120
1051	8708	| nucleoporin NUP53 isoform X2 | 129401 | NUP35 | 309 | Q8NFH5 | sp	XP_006712317	42.44	20	4	4		1972.4	940.23	2396.4	0	0	0	1790.4	940.23	2155.9	0	0	0	1.00:0.53:1.20:0:0:0	2307.9	0	2096.6	0	#DIV/0!	1.00:0	33120
1051	8709	| nucleoporin NUP53 isoform b | 129401 | NUP35 | 309 | Q8NFH5 | sp	NP_001274513	42.44	20	4	4		1972.4	940.23	2396.4	0	0	0	1790.4	940.23	2155.9	0	0	0	1.00:0.53:1.20:0:0:0	2307.9	0	2096.6	0	#DIV/0!	1.00:0	33120
1051	8710	| nucleoporin NUP53 isoform X2 | 129401 | NUP35 | 309 | Q8NFH5 | sp	XP_011508879	42.44	20	4	4		1972.4	940.23	2396.4	0	0	0	1790.4	940.23	2155.9	0	0	0	1.00:0.53:1.20:0:0:0	2307.9	0	2096.6	0	#DIV/0!	1.00:0	33120
1051	8711	| nucleoporin NUP53 isoform a | 129401 | NUP35 | 326 | Q8NFH5 | sp	NP_612142	42.44	19	4	4		1972.4	940.23	2396.4	0	0	0	1790.4	940.23	2155.9	0	0	0	1.00:0.53:1.20:0:0:0	2307.9	0	2096.6	0	#DIV/0!	1.00:0	34774
1051	8712	| nucleoporin NUP53 isoform X1 | 129401 | NUP35 | 329 | nan | nan	XP_016858797	42.44	19	4	4		1972.4	940.23	2396.4	0	0	0	1790.4	940.23	2155.9	0	0	0	1.00:0.53:1.20:0:0:0	2307.9	0	2096.6	0	#DIV/0!	1.00:0	35215
1104	5286	| mediator of RNA polymerase II transcription subunit 17 | 9440 | MED17 | 651 | Q9NVC6 | sp	NP_004259	42.41	11	4	4	Carbamidomethylation	2437.3	2090.5	1473	0	0	0	2131.2	2090.5	1027.5	0	0	0	1.00:0.98:0.48:0:0:0	2320.8	0	1945	0	#DIV/0!	1.00:0	72890
925	9344	| glutamyl-tRNA(Gln) amidotransferase subunit A mitochondrial | 55278 | QRSL1 | 528 | Q9H0R6 | sp	NP_060762	41.99	13	4	4	Carbamidomethylation	1683.2	840.62	2106.8	0	0	0	1683.2	840.62	1782.8	0	0	0	1.00:0.50:1.06:0:0:0	1916.5	0	1592.5	0	#DIV/0!	1.00:0	57461
862	8040	| catechol O-methyltransferase isoform X1 | 1312 | COMT | 408 | nan | nan	XP_011528188	41.81	12	3	3	Carbamidomethylation	872.74	942.87	1930.4	0	0	0	872.74	942.87	1930.4	0	0	0	1.00:1.08:2.21:0:0:0	1662	0	1662	0	#DIV/0!	1.00:0	45090
862	8659	| catechol O-methyltransferase isoform S-COMT | 1312 | COMT | 221 | P21964 | sp	NP_009294	41.81	22	3	3	Carbamidomethylation	872.74	942.87	1930.4	0	0	0	872.74	942.87	1930.4	0	0	0	1.00:1.08:2.21:0:0:0	1662	0	1662	0	#DIV/0!	1.00:0	24449
862	8660	| catechol O-methyltransferase isoform MB-COMT | 1312 | COMT | 271 | P21964 | sp	NP_001128634	41.81	18	3	3	Carbamidomethylation	872.74	942.87	1930.4	0	0	0	872.74	942.87	1930.4	0	0	0	1.00:1.08:2.21:0:0:0	1662	0	1662	0	#DIV/0!	1.00:0	30037
862	8661	| catechol O-methyltransferase isoform MB-COMT | 1312 | COMT | 271 | P21964 | sp	NP_001128633	41.81	18	3	3	Carbamidomethylation	872.74	942.87	1930.4	0	0	0	872.74	942.87	1930.4	0	0	0	1.00:1.08:2.21:0:0:0	1662	0	1662	0	#DIV/0!	1.00:0	30037
862	8662	| catechol O-methyltransferase isoform X2 | 1312 | COMT | 271 | P21964 | sp	XP_016884084	41.81	18	3	3	Carbamidomethylation	872.74	942.87	1930.4	0	0	0	872.74	942.87	1930.4	0	0	0	1.00:1.08:2.21:0:0:0	1662	0	1662	0	#DIV/0!	1.00:0	30037
862	8663	| catechol O-methyltransferase isoform MB-COMT | 1312 | COMT | 271 | P21964 | sp	NP_000745	41.81	18	3	3	Carbamidomethylation	872.74	942.87	1930.4	0	0	0	872.74	942.87	1930.4	0	0	0	1.00:1.08:2.21:0:0:0	1662	0	1662	0	#DIV/0!	1.00:0	30037
862	8664	| catechol O-methyltransferase isoform X2 | 1312 | COMT | 271 | P21964 | sp	XP_016884083	41.81	18	3	3	Carbamidomethylation	872.74	942.87	1930.4	0	0	0	872.74	942.87	1930.4	0	0	0	1.00:1.08:2.21:0:0:0	1662	0	1662	0	#DIV/0!	1.00:0	30037
24	19	| elongation factor 2 | 1938 | EEF2 | 858 | P13639 | sp	NP_001952	41.62	58	40	40	Carbamidomethylation; Oxidation (M)	74934	80340	78798	20713	22844	29128	20243	21319	21216	7577	6912.2	7581.7	1.00:1.05:1.05:0.37:0.34:0.37	79499	27945	20926	7356.9	2.8444	1.00:0.35	95338
1578	12259	| adenylyl cyclase-associated protein 2 isoform X2 | 10486 | CAP2 | 365 | nan | nan	XP_024302072	41.57	13	3	3		1158.8	693.06	1616.5	0	0	0	1158.8	693.06	1616.5	0	0	0	1.00:0.60:1.40:0:0:0	1622.6	0	1622.6	0	#DIV/0!	1.00:0	39911
1578	12260	| adenylyl cyclase-associated protein 2 | 10486 | CAP2 | 477 | P40123 | sp	NP_006357	41.57	10	3	3		1158.8	693.06	1616.5	0	0	0	1158.8	693.06	1616.5	0	0	0	1.00:0.60:1.40:0:0:0	1622.6	0	1622.6	0	#DIV/0!	1.00:0	52824
688	7627	| OCIA domain-containing protein 1 isoform 4 | 54940 | OCIAD1 | 250 | nan | nan	NP_001161726	41.55	30	7	7	Carbamidomethylation	6286.7	5332.2	8853	0	0	212.67	3126.1	2734.6	5149.2	0	0	0	1.00:0.87:1.65:0:0:0	6824	212.67	3670	0	#DIV/0!	1.00:0	28175
688	7941	| OCIA domain-containing protein 1 isoform X2 | 54940 | OCIAD1 | 245 | nan | nan	XP_024309875	41.55	30	7	7	Carbamidomethylation	6286.7	5332.2	8853	0	0	212.67	3126.1	2734.6	5149.2	0	0	0	1.00:0.87:1.65:0:0:0	6824	212.67	3670	0	#DIV/0!	1.00:0	27626
688	7942	| OCIA domain-containing protein 1 isoform 1 | 54940 | OCIAD1 | 245 | Q9NX40 | sp	NP_001073308	41.55	30	7	7	Carbamidomethylation	6286.7	5332.2	8853	0	0	212.67	3126.1	2734.6	5149.2	0	0	0	1.00:0.87:1.65:0:0:0	6824	212.67	3670	0	#DIV/0!	1.00:0	27626
688	7943	| OCIA domain-containing protein 1 isoform X2 | 54940 | OCIAD1 | 245 | nan | nan	XP_024309876	41.55	30	7	7	Carbamidomethylation	6286.7	5332.2	8853	0	0	212.67	3126.1	2734.6	5149.2	0	0	0	1.00:0.87:1.65:0:0:0	6824	212.67	3670	0	#DIV/0!	1.00:0	27626
688	7944	| OCIA domain-containing protein 1 isoform 1 | 54940 | OCIAD1 | 245 | Q9NX40 | sp	NP_060300	41.55	30	7	7	Carbamidomethylation	6286.7	5332.2	8853	0	0	212.67	3126.1	2734.6	5149.2	0	0	0	1.00:0.87:1.65:0:0:0	6824	212.67	3670	0	#DIV/0!	1.00:0	27626
688	7945	| OCIA domain-containing protein 1 isoform X2 | 54940 | OCIAD1 | 245 | nan | nan	XP_024309874	41.55	30	7	7	Carbamidomethylation	6286.7	5332.2	8853	0	0	212.67	3126.1	2734.6	5149.2	0	0	0	1.00:0.87:1.65:0:0:0	6824	212.67	3670	0	#DIV/0!	1.00:0	27626
688	7946	| OCIA domain-containing protein 1 isoform X1 | 54940 | OCIAD1 | 260 | nan | nan	XP_024309873	41.55	28	7	7	Carbamidomethylation	6286.7	5332.2	8853	0	0	212.67	3126.1	2734.6	5149.2	0	0	0	1.00:0.87:1.65:0:0:0	6824	212.67	3670	0	#DIV/0!	1.00:0	29127
1112	7246	| lysophosphatidylcholine acyltransferase 1 | 79888 | LPCAT1 | 534 | Q8NF37 | sp	NP_079106	41.4	7	3	3	Carbamidomethylation	3562.5	1789.7	2602.9	0	0	0	3562.5	1789.7	2602.9	0	0	0	1.00:0.50:0.73:0:0:0	2651.7	0	2651.7	0	#DIV/0!	1.00:0	59151
1112	7502	| lysophosphatidylcholine acyltransferase 1 isoform X3 | 79888 | LPCAT1 | 486 | D3DTC2 | tr	XP_005248430	41.4	8	3	3	Carbamidomethylation	3562.5	1789.7	2602.9	0	0	0	3562.5	1789.7	2602.9	0	0	0	1.00:0.50:0.73:0:0:0	2651.7	0	2651.7	0	#DIV/0!	1.00:0	54190
1112	7503	| lysophosphatidylcholine acyltransferase 1 isoform X2 | 79888 | LPCAT1 | 493 | nan | nan	XP_011512436	41.4	8	3	3	Carbamidomethylation	3562.5	1789.7	2602.9	0	0	0	3562.5	1789.7	2602.9	0	0	0	1.00:0.50:0.73:0:0:0	2651.7	0	2651.7	0	#DIV/0!	1.00:0	54843
1112	7504	| lysophosphatidylcholine acyltransferase 1 isoform X1 | 79888 | LPCAT1 | 571 | nan | nan	XP_011512434	41.4	6	3	3	Carbamidomethylation	3562.5	1789.7	2602.9	0	0	0	3562.5	1789.7	2602.9	0	0	0	1.00:0.50:0.73:0:0:0	2651.7	0	2651.7	0	#DIV/0!	1.00:0	63037
967	8620	| atlastin-2 isoform 7 | 64225 | ATL2 | 579 | nan | nan	NP_001317391	41.35	16	5	5	Carbamidomethylation	1008.5	1154.4	2526.6	0	0	0	1008.5	1001.6	1979.2	0	0	0	1.00:0.99:1.96:0:0:0	2249	0	1745.4	0	#DIV/0!	1.00:0	66267
967	8929	| atlastin-2 isoform 1 | 64225 | ATL2 | 579 | Q8NHH9 | sp	NP_071769	41.35	16	5	5	Carbamidomethylation	1008.5	1154.4	2526.6	0	0	0	1008.5	1001.6	1979.2	0	0	0	1.00:0.99:1.96:0:0:0	2249	0	1745.4	0	#DIV/0!	1.00:0	66087
967	8930	| atlastin-2 isoform 2 | 64225 | ATL2 | 583 | Q8NHH9 | sp	NP_001129145	41.35	16	5	5	Carbamidomethylation	1008.5	1154.4	2526.6	0	0	0	1008.5	1001.6	1979.2	0	0	0	1.00:0.99:1.96:0:0:0	2249	0	1745.4	0	#DIV/0!	1.00:0	66229
967	8931	| atlastin-2 isoform 8 | 64225 | ATL2 | 584 | nan | nan	NP_001317392	41.35	16	5	5	Carbamidomethylation	1008.5	1154.4	2526.6	0	0	0	1008.5	1001.6	1979.2	0	0	0	1.00:0.99:1.96:0:0:0	2249	0	1745.4	0	#DIV/0!	1.00:0	66712
967	9229	| atlastin-2 isoform 3 | 64225 | ATL2 | 565 | Q8NHH9 | sp	NP_001295005	41.35	16	5	5	Carbamidomethylation	1008.5	1154.4	2526.6	0	0	0	1008.5	1001.6	1979.2	0	0	0	1.00:0.99:1.96:0:0:0	2249	0	1745.4	0	#DIV/0!	1.00:0	64522
967	9230	| atlastin-2 isoform 5 | 64225 | ATL2 | 566 | Q8NHH9 | sp	NP_001317388	41.35	16	5	5	Carbamidomethylation	1008.5	1154.4	2526.6	0	0	0	1008.5	1001.6	1979.2	0	0	0	1.00:0.99:1.96:0:0:0	2249	0	1745.4	0	#DIV/0!	1.00:0	65005
793	4882	| metastasis-associated protein MTA1 isoform X13 | 9112 | MTA1 | 726 | nan | nan	XP_016877247	41.32	7	4	4		1270.2	583.78	1745.4	0	0	0	1270.2	583.78	1202	0	0	0	1.00:0.46:0.95:0:0:0	1694.2	0	1150.7	0	#DIV/0!	1.00:0	82106
994	6376	| peroxisomal acyl-coenzyme A oxidase 1 isoform a | 51 | ACOX1 | 660 | Q15067 | sp	NP_004026	41.25	12	5	5	Carbamidomethylation	1426.1	901.34	2853.3	0	0	0	1141.8	901.34	1921.3	0	0	0	1.00:0.79:1.68:0:0:0	2240	0	1321.5	0	#DIV/0!	1.00:0	74668
2110	16478	| 39S ribosomal protein L43 mitochondrial isoform a | 84545 | MRPL43 | 159 | Q8N983 | sp	NP_115488	41.23	14	2	2		1544.5	1258.7	592.9	0	0	0	1544.5	1258.7	592.9	0	0	0	1.00:0.81:0.38:0:0:0	1415.4	0	1415.4	0	#DIV/0!	1.00:0	17853
2110	16479	| 39S ribosomal protein L43 mitochondrial isoform X2 | 84545 | MRPL43 | 159 | Q8N983 | sp	XP_005270288	41.23	14	2	2		1544.5	1258.7	592.9	0	0	0	1544.5	1258.7	592.9	0	0	0	1.00:0.81:0.38:0:0:0	1415.4	0	1415.4	0	#DIV/0!	1.00:0	17853
2110	16480	| 39S ribosomal protein L43 mitochondrial isoform X2 | 84545 | MRPL43 | 159 | Q8N983 | sp	XP_006718098	41.23	14	2	2		1544.5	1258.7	592.9	0	0	0	1544.5	1258.7	592.9	0	0	0	1.00:0.81:0.38:0:0:0	1415.4	0	1415.4	0	#DIV/0!	1.00:0	17853
2110	16481	| 39S ribosomal protein L43 mitochondrial isoform e | 84545 | MRPL43 | 164 | Q8N983 | sp	NP_001295325	41.23	13	2	2		1544.5	1258.7	592.9	0	0	0	1544.5	1258.7	592.9	0	0	0	1.00:0.81:0.38:0:0:0	1415.4	0	1415.4	0	#DIV/0!	1.00:0	18311
2110	16482	| 39S ribosomal protein L43 mitochondrial isoform X1 | 84545 | MRPL43 | 197 | nan | nan	XP_016872279	41.23	11	2	2		1544.5	1258.7	592.9	0	0	0	1544.5	1258.7	592.9	0	0	0	1.00:0.81:0.38:0:0:0	1415.4	0	1415.4	0	#DIV/0!	1.00:0	21896
2110	16483	| 39S ribosomal protein L43 mitochondrial isoform c | 84545 | MRPL43 | 202 | Q8N983 | sp	NP_789763	41.23	11	2	2		1544.5	1258.7	592.9	0	0	0	1544.5	1258.7	592.9	0	0	0	1.00:0.81:0.38:0:0:0	1415.4	0	1415.4	0	#DIV/0!	1.00:0	22580
2110	16484	| 39S ribosomal protein L43 mitochondrial isoform b | 84545 | MRPL43 | 215 | Q8N983 | sp	NP_789762	41.23	10	2	2		1544.5	1258.7	592.9	0	0	0	1544.5	1258.7	592.9	0	0	0	1.00:0.81:0.38:0:0:0	1415.4	0	1415.4	0	#DIV/0!	1.00:0	23431
2110	16485	| 39S ribosomal protein L43 mitochondrial isoform d | 84545 | MRPL43 | 235 | Q8N983 | sp	NP_789764	41.23	9	2	2		1544.5	1258.7	592.9	0	0	0	1544.5	1258.7	592.9	0	0	0	1.00:0.81:0.38:0:0:0	1415.4	0	1415.4	0	#DIV/0!	1.00:0	25862
63	21	| nucleolar protein 56 | 10528 | NOP56 | 594 | O00567 | sp	NP_006383	41.11	50	21	21	Carbamidomethylation; Oxidation (M)	27292	24282	32584	1699.8	2575.4	3676.4	13375	10892	14189	1699.8	1865	2240	1.00:0.81:1.06:0.13:0.14:0.17	29915	3358.6	12819	1934.9	6.62515	1.00:0.15	66050
2071	17675	| aldose reductase isoform 1 | 231 | AKR1B1 | 316 | P15121 | sp	NP_001619	41.11	9	2	2	Carbamidomethylation	1244.9	546.17	1029.5	0	0	0	1244.9	546.17	1029.5	0	0	0	1.00:0.44:0.83:0:0:0	1124.9	0	1124.9	0	#DIV/0!	1.00:0	35853
711	2633	| zinc finger MYM-type protein 3 isoform X2 | 9203 | ZMYM3 | 1358 | Q14202 | sp	XP_005262367	40.99	8	7	7	Carbamidomethylation	2479.9	1387.7	2899.9	0	0	0	1696.9	895.96	1703.2	0	0	0	1.00:0.53:1.00:0:0:0	3244.1	0	1599.4	0	#DIV/0!	1.00:0	151083
711	2634	| zinc finger MYM-type protein 3 isoform 2 | 9203 | ZMYM3 | 1358 | Q14202 | sp	NP_001164633	40.99	8	7	7	Carbamidomethylation	2479.9	1387.7	2899.9	0	0	0	1696.9	895.96	1703.2	0	0	0	1.00:0.53:1.00:0:0:0	3244.1	0	1599.4	0	#DIV/0!	1.00:0	151083
711	2635	| zinc finger MYM-type protein 3 isoform X1 | 9203 | ZMYM3 | 1370 | Q14202 | sp	XP_005262366	40.99	8	7	7	Carbamidomethylation	2479.9	1387.7	2899.9	0	0	0	1696.9	895.96	1703.2	0	0	0	1.00:0.53:1.00:0:0:0	3244.1	0	1599.4	0	#DIV/0!	1.00:0	152379
711	2636	| zinc finger MYM-type protein 3 isoform 1 | 9203 | ZMYM3 | 1370 | Q14202 | sp	NP_963893	40.99	8	7	7	Carbamidomethylation	2479.9	1387.7	2899.9	0	0	0	1696.9	895.96	1703.2	0	0	0	1.00:0.53:1.00:0:0:0	3244.1	0	1599.4	0	#DIV/0!	1.00:0	152379
711	2637	| zinc finger MYM-type protein 3 isoform X1 | 9203 | ZMYM3 | 1370 | Q14202 | sp	XP_011529364	40.99	8	7	7	Carbamidomethylation	2479.9	1387.7	2899.9	0	0	0	1696.9	895.96	1703.2	0	0	0	1.00:0.53:1.00:0:0:0	3244.1	0	1599.4	0	#DIV/0!	1.00:0	152379
711	2638	| zinc finger MYM-type protein 3 isoform 1 | 9203 | ZMYM3 | 1370 | Q14202 | sp	NP_005087	40.99	8	7	7	Carbamidomethylation	2479.9	1387.7	2899.9	0	0	0	1696.9	895.96	1703.2	0	0	0	1.00:0.53:1.00:0:0:0	3244.1	0	1599.4	0	#DIV/0!	1.00:0	152379
437	3598	| serine--tRNA ligase mitochondrial isoform b precursor | 54938 | SARS2 | 518 | Q9NP81 | sp	NP_060297	40.97	27	9	9	Carbamidomethylation	5604.5	4948.9	7986.5	0	0	0	2861.2	2445	4564.9	0	0	0	1.00:0.85:1.60:0:0:0	6510.4	0	3290.4	0	#DIV/0!	1.00:0	58283
1002	4702	| sorting and assembly machinery component 50 homolog | 25813 | SAMM50 | 469 | Q9Y512 | sp	NP_056195	40.95	11	4	4	Carbamidomethylation	716.43	901.17	1922.6	0	0	0	716.43	901.17	1553.2	0	0	0	1.00:1.26:2.17:0:0:0	1740.7	0	1371.3	0	#DIV/0!	1.00:0	51976
1349	11300	| pentatricopeptide repeat domain-containing protein 3 mitochondrial | 55037 | PTCD3 | 689 | Q96EY7 | sp	NP_060422	40.92	6	3	3		1429.6	539.32	1141.3	0	0	0	1429.6	539.32	1141.3	0	0	0	1.00:0.38:0.80:0:0:0	1158.5	0	1158.5	0	#DIV/0!	1.00:0	78550
1268	10875	| 14-3-3 protein gamma | 7532 | YWHAG | 247 | P61981 | sp	NP_036611	40.9	13	2	2		1182.8	1150	1257.3	431.21	398.86	457.62	1182.8	1150	1257.3	431.21	398.86	457.62	1.00:0.97:1.06:0.36:0.34:0.39	1196.7	429.23	1196.7	429.23	2.78802	1.00:0.36	28303
825	7908	| elongin-A | 6924 | ELOA | 798 | Q14241 | sp	NP_003189	40.85	9	4	4		1031	888.12	2292	0	0	0	1031	888.12	1813	0	0	0	1.00:0.86:1.76:0:0:0	2081.9	0	1602.9	0	#DIV/0!	1.00:0	89909
1687	13330	| oxysterol-binding protein-related protein 3 isoform d | 26031 | OSBPL3 | 820 | Q9H4L5 | sp	NP_663162	40.85	5	3	3	Carbamidomethylation	566.78	851.53	1549.7	0	0	0	566.78	851.53	1549.7	0	0	0	1.00:1.50:2.73:0:0:0	1504.2	0	1504.2	0	#DIV/0!	1.00:0	93788
1687	13331	| oxysterol-binding protein-related protein 3 isoform X5 | 26031 | OSBPL3 | 820 | Q9H4L5 | sp	XP_006715746	40.85	5	3	3	Carbamidomethylation	566.78	851.53	1549.7	0	0	0	566.78	851.53	1549.7	0	0	0	1.00:1.50:2.73:0:0:0	1504.2	0	1504.2	0	#DIV/0!	1.00:0	93788
1687	13332	| oxysterol-binding protein-related protein 3 isoform c | 26031 | OSBPL3 | 851 | Q9H4L5 | sp	NP_663161	40.85	5	3	3	Carbamidomethylation	566.78	851.53	1549.7	0	0	0	566.78	851.53	1549.7	0	0	0	1.00:1.50:2.73:0:0:0	1504.2	0	1504.2	0	#DIV/0!	1.00:0	97325
1687	13333	| oxysterol-binding protein-related protein 3 isoform X3 | 26031 | OSBPL3 | 851 | Q9H4L5 | sp	XP_006715745	40.85	5	3	3	Carbamidomethylation	566.78	851.53	1549.7	0	0	0	566.78	851.53	1549.7	0	0	0	1.00:1.50:2.73:0:0:0	1504.2	0	1504.2	0	#DIV/0!	1.00:0	97325
1687	13334	| oxysterol-binding protein-related protein 3 isoform b | 26031 | OSBPL3 | 856 | Q9H4L5 | sp	NP_663160	40.85	5	3	3	Carbamidomethylation	566.78	851.53	1549.7	0	0	0	566.78	851.53	1549.7	0	0	0	1.00:1.50:2.73:0:0:0	1504.2	0	1504.2	0	#DIV/0!	1.00:0	97687
1687	13335	| oxysterol-binding protein-related protein 3 isoform X2 | 26031 | OSBPL3 | 856 | Q9H4L5 | sp	XP_006715744	40.85	5	3	3	Carbamidomethylation	566.78	851.53	1549.7	0	0	0	566.78	851.53	1549.7	0	0	0	1.00:1.50:2.73:0:0:0	1504.2	0	1504.2	0	#DIV/0!	1.00:0	97687
1687	13336	| oxysterol-binding protein-related protein 3 isoform X1 | 26031 | OSBPL3 | 887 | Q9H4L5 | sp	XP_011513560	40.85	5	3	3	Carbamidomethylation	566.78	851.53	1549.7	0	0	0	566.78	851.53	1549.7	0	0	0	1.00:1.50:2.73:0:0:0	1504.2	0	1504.2	0	#DIV/0!	1.00:0	101224
1687	13337	| oxysterol-binding protein-related protein 3 isoform X1 | 26031 | OSBPL3 | 887 | Q9H4L5 | sp	XP_005249755	40.85	5	3	3	Carbamidomethylation	566.78	851.53	1549.7	0	0	0	566.78	851.53	1549.7	0	0	0	1.00:1.50:2.73:0:0:0	1504.2	0	1504.2	0	#DIV/0!	1.00:0	101224
1687	13338	| oxysterol-binding protein-related protein 3 isoform a | 26031 | OSBPL3 | 887 | Q9H4L5 | sp	NP_056365	40.85	5	3	3	Carbamidomethylation	566.78	851.53	1549.7	0	0	0	566.78	851.53	1549.7	0	0	0	1.00:1.50:2.73:0:0:0	1504.2	0	1504.2	0	#DIV/0!	1.00:0	101224
1687	14007	| oxysterol-binding protein-related protein 3 isoform X6 | 26031 | OSBPL3 | 807 | nan | nan	XP_016867438	40.85	5	3	3	Carbamidomethylation	566.78	851.53	1549.7	0	0	0	566.78	851.53	1549.7	0	0	0	1.00:1.50:2.73:0:0:0	1504.2	0	1504.2	0	#DIV/0!	1.00:0	92555
1687	14008	| oxysterol-binding protein-related protein 3 isoform X4 | 26031 | OSBPL3 | 843 | nan | nan	XP_011513561	40.85	5	3	3	Carbamidomethylation	566.78	851.53	1549.7	0	0	0	566.78	851.53	1549.7	0	0	0	1.00:1.50:2.73:0:0:0	1504.2	0	1504.2	0	#DIV/0!	1.00:0	96453
1687	14009	| oxysterol-binding protein-related protein 3 isoform X4 | 26031 | OSBPL3 | 843 | nan | nan	XP_016867437	40.85	5	3	3	Carbamidomethylation	566.78	851.53	1549.7	0	0	0	566.78	851.53	1549.7	0	0	0	1.00:1.50:2.73:0:0:0	1504.2	0	1504.2	0	#DIV/0!	1.00:0	96453
1041	7692	| MAU2 chromatid cohesion factor homolog | 23383 | MAU2 | 613 | Q9Y6X3 | sp	NP_056144	40.85	9	4	4	Carbamidomethylation	576.45	1304	2098.2	0	0	0	576.45	1009.6	1623.7	0	0	0	1.00:1.75:2.82:0:0:0	1660.9	0	1276.5	0	#DIV/0!	1.00:0	69082
1616	12235	| survival of motor neuron-related-splicing factor 30 | 10285 | SMNDC1 | 238 | O75940 | sp	NP_005862	40.81	21	3	3		1782.2	966.84	896.37	0	0	0	1782.2	966.84	896.37	0	0	0	1.00:0.54:0.50:0:0:0	1427.3	0	1427.3	0	#DIV/0!	1.00:0	26711
489	5990	| heat shock protein beta-1 | 3315 | HSPB1 | 205 | P04792 | sp	NP_001531	40.81	72	10	10		68150	61817	61586	3114.6	3566.3	4797.6	60312	49754	51083	3114.6	3566.3	4361.2	1.00:0.82:0.85:0.05:0.06:0.07	64174	4117.1	53716	3680.7	14.594	1.00:0.07	22783
1668	15931	| sterol O-acyltransferase 1 isoform X1 | 6646 | SOAT1 | 550 | P35610 | sp	XP_011508213	40.79	5	2	2		1022.3	504.86	1061.7	0	0	0	1022.3	504.86	1061.7	0	0	0	1.00:0.49:1.04:0:0:0	1493.5	0	1493.5	0	#DIV/0!	1.00:0	64735
1668	15932	| sterol O-acyltransferase 1 isoform 1 | 6646 | SOAT1 | 550 | P35610 | sp	NP_003092	40.79	5	2	2		1022.3	504.86	1061.7	0	0	0	1022.3	504.86	1061.7	0	0	0	1.00:0.49:1.04:0:0:0	1493.5	0	1493.5	0	#DIV/0!	1.00:0	64735
1668	16032	| sterol O-acyltransferase 1 isoform X2 | 6646 | SOAT1 | 331 | nan | nan	XP_011508214	40.79	9	2	2		1022.3	504.86	1061.7	0	0	0	1022.3	504.86	1061.7	0	0	0	1.00:0.49:1.04:0:0:0	1493.5	0	1493.5	0	#DIV/0!	1.00:0	38188
1583	13199	| translational activator of cytochrome c oxidase 1 | 51204 | TACO1 | 297 | Q9BSH4 | sp	NP_057444	40.76	13	2	2	Carbamidomethylation	688.15	974.32	1494.5	0	0	0	688.15	974.32	1494.5	0	0	0	1.00:1.42:2.17:0:0:0	1398.9	0	1398.9	0	#DIV/0!	1.00:0	32477
1478	14156	| TELO2-interacting protein 1 homolog isoform X1 | 9675 | TTI1 | 1042 | nan | nan	XP_016883637	40.73	3	2	2	Carbamidomethylation	1104.2	1029.2	456.69	0	0	0	1104.2	1029.2	456.69	0	0	0	1.00:0.93:0.41:0:0:0	863.36	0	863.36	0	#DIV/0!	1.00:0	116580
1478	14157	| TELO2-interacting protein 1 homolog | 9675 | TTI1 | 1089 | O43156 | sp	NP_055472	40.73	3	2	2	Carbamidomethylation	1104.2	1029.2	456.69	0	0	0	1104.2	1029.2	456.69	0	0	0	1.00:0.93:0.41:0:0:0	863.36	0	863.36	0	#DIV/0!	1.00:0	122069
1478	14158	| TELO2-interacting protein 1 homolog | 9675 | TTI1 | 1089 | O43156 | sp	NP_001290386	40.73	3	2	2	Carbamidomethylation	1104.2	1029.2	456.69	0	0	0	1104.2	1029.2	456.69	0	0	0	1.00:0.93:0.41:0:0:0	863.36	0	863.36	0	#DIV/0!	1.00:0	122069
304	1387	| protein CIP2A isoform X1 | 57650 | CIP2A | 904 | nan | nan	XP_006713779	40.73	20	14	14	Carbamidomethylation	5751	7446.5	7407.5	3469.2	3441.5	3709.8	2173.2	2043.4	2027.8	3469.2	3441.5	3709.8	1.00:0.94:0.93:1.60:1.58:1.71	7511	3540.2	2081.5	3540.2	0.587961	1.00:1.70	102114
304	1388	| protein CIP2A | 57650 | CIP2A | 905 | Q8TCG1 | sp	NP_065941	40.73	20	14	14	Carbamidomethylation	5751	7446.5	7407.5	3469.2	3441.5	3709.8	2173.2	2043.4	2027.8	3469.2	3441.5	3709.8	1.00:0.94:0.93:1.60:1.58:1.71	7511	3540.2	2081.5	3540.2	0.587961	1.00:1.70	102185
1743	12266	| protein Mis18-alpha | 54069 | MIS18A | 233 | Q9NYP9 | sp	NP_061817	40.69	19	3	3	Carbamidomethylation	1179.4	540.59	964.07	0	0	0	1179.4	540.59	964.07	0	0	0	1.00:0.46:0.82:0:0:0	1433.3	0	1433.3	0	#DIV/0!	1.00:0	25863
536	6236	| signal peptidase complex subunit 2 | 9789 | SPCS2 | 226 | Q15005 | sp	NP_055567	40.67	30	7	7		6400.3	5581.2	9965.8	0	0	0	4848.9	4420.4	7725.9	0	0	0	1.00:0.91:1.59:0:0:0	7874.9	0	5665.1	0	#DIV/0!	1.00:0	25003
983	8002	| annexin A1 isoform X2 | 301 | ANXA1 | 346 | P04083 | sp	XP_011516911	40.66	24	5	5		1503.6	2174.4	1512.3	0	0	0	1170.1	1470.9	702.8	0	0	0	1.00:1.26:0.60:0:0:0	2041.2	0	1276	0	#DIV/0!	1.00:0	38714
983	8003	| annexin A1 | 301 | ANXA1 | 346 | P04083 | sp	NP_000691	40.66	24	5	5		1503.6	2174.4	1512.3	0	0	0	1170.1	1470.9	702.8	0	0	0	1.00:1.26:0.60:0:0:0	2041.2	0	1276	0	#DIV/0!	1.00:0	38714
983	8100	| annexin A1 isoform X1 | 301 | ANXA1 | 357 | nan | nan	XP_016870146	40.66	24	5	5		1503.6	2174.4	1512.3	0	0	0	1170.1	1470.9	702.8	0	0	0	1.00:1.26:0.60:0:0:0	2041.2	0	1276	0	#DIV/0!	1.00:0	40082
1797	17205	| rhotekin isoform X4 | 6242 | RTKN | 465 | nan | nan	XP_005264536	40.65	7	2	2	Carbamidomethylation	635.46	491.42	1208.2	0	0	0	635.46	491.42	1208.2	0	0	0	1.00:0.77:1.90:0:0:0	1243.2	0	1243.2	0	#DIV/0!	1.00:0	52064
1797	17324	| rhotekin isoform X2 | 6242 | RTKN | 490 | nan | nan	XP_005264535	40.65	7	2	2	Carbamidomethylation	635.46	491.42	1208.2	0	0	0	635.46	491.42	1208.2	0	0	0	1.00:0.77:1.90:0:0:0	1243.2	0	1243.2	0	#DIV/0!	1.00:0	54532
1797	17332	| rhotekin isoform a | 6242 | RTKN | 563 | Q9BST9 | sp	NP_001015055	40.65	6	2	2	Carbamidomethylation	635.46	491.42	1208.2	0	0	0	635.46	491.42	1208.2	0	0	0	1.00:0.77:1.90:0:0:0	1243.2	0	1243.2	0	#DIV/0!	1.00:0	62667
1774	15860	| serine/arginine-rich splicing factor 11 isoform 2 | 9295 | SRSF11 | 483 | nan | nan	NP_001337536	40.65	8	2	2		496.14	918.23	1089.6	0	0	0	496.14	918.23	1089.6	0	0	0	1.00:1.85:2.20:0:0:0	1025.4	0	1025.4	0	#DIV/0!	1.00:0	53414
1774	15861	| serine/arginine-rich splicing factor 11 isoform 2 | 9295 | SRSF11 | 483 | Q05519 | sp	NP_001177916	40.65	8	2	2		496.14	918.23	1089.6	0	0	0	496.14	918.23	1089.6	0	0	0	1.00:1.85:2.20:0:0:0	1025.4	0	1025.4	0	#DIV/0!	1.00:0	53414
1774	15862	| serine/arginine-rich splicing factor 11 isoform 1 | 9295 | SRSF11 | 484 | Q05519 | sp	NP_004759	40.65	8	2	2		496.14	918.23	1089.6	0	0	0	496.14	918.23	1089.6	0	0	0	1.00:1.85:2.20:0:0:0	1025.4	0	1025.4	0	#DIV/0!	1.00:0	53542
1774	15863	| serine/arginine-rich splicing factor 11 isoform 1 | 9295 | SRSF11 | 484 | nan | nan	NP_001337535	40.65	8	2	2		496.14	918.23	1089.6	0	0	0	496.14	918.23	1089.6	0	0	0	1.00:1.85:2.20:0:0:0	1025.4	0	1025.4	0	#DIV/0!	1.00:0	53542
1774	15864	| serine/arginine-rich splicing factor 11 isoform 1 | 9295 | SRSF11 | 484 | nan | nan	NP_001337534	40.65	8	2	2		496.14	918.23	1089.6	0	0	0	496.14	918.23	1089.6	0	0	0	1.00:1.85:2.20:0:0:0	1025.4	0	1025.4	0	#DIV/0!	1.00:0	53542
1774	15865	| serine/arginine-rich splicing factor 11 isoform 4 | 9295 | SRSF11 | 490 | nan | nan	NP_001337538	40.65	8	2	2		496.14	918.23	1089.6	0	0	0	496.14	918.23	1089.6	0	0	0	1.00:1.85:2.20:0:0:0	1025.4	0	1025.4	0	#DIV/0!	1.00:0	54170
1774	15866	| serine/arginine-rich splicing factor 11 isoform X1 | 9295 | SRSF11 | 491 | nan | nan	XP_005271395	40.65	8	2	2		496.14	918.23	1089.6	0	0	0	496.14	918.23	1089.6	0	0	0	1.00:1.85:2.20:0:0:0	1025.4	0	1025.4	0	#DIV/0!	1.00:0	54298
1774	15867	| serine/arginine-rich splicing factor 11 isoform X1 | 9295 | SRSF11 | 491 | nan | nan	XP_024306673	40.65	8	2	2		496.14	918.23	1089.6	0	0	0	496.14	918.23	1089.6	0	0	0	1.00:1.85:2.20:0:0:0	1025.4	0	1025.4	0	#DIV/0!	1.00:0	54298
1774	15868	| serine/arginine-rich splicing factor 11 isoform 3 | 9295 | SRSF11 | 491 | nan | nan	NP_001337537	40.65	8	2	2		496.14	918.23	1089.6	0	0	0	496.14	918.23	1089.6	0	0	0	1.00:1.85:2.20:0:0:0	1025.4	0	1025.4	0	#DIV/0!	1.00:0	54298
1767	12927	| NADH-cytochrome b5 reductase 3 isoform 3 | 1727 | CYB5R3 | 334 | P00387 | sp	NP_001165131	40.6	15	3	3		583.68	505.96	1199	0	0	0	583.68	505.96	1199	0	0	0	1.00:0.87:2.05:0:0:0	1014.2	0	1014.2	0	#DIV/0!	1.00:0	38226
1767	13129	| NADH-cytochrome b5 reductase 3 isoform 2 | 1727 | CYB5R3 | 278 | P00387 | sp	NP_001165132	40.6	18	3	3		583.68	505.96	1199	0	0	0	583.68	505.96	1199	0	0	0	1.00:0.87:2.05:0:0:0	1014.2	0	1014.2	0	#DIV/0!	1.00:0	31629
1767	13130	| NADH-cytochrome b5 reductase 3 isoform 2 | 1727 | CYB5R3 | 278 | P00387 | sp	NP_015565	40.6	18	3	3		583.68	505.96	1199	0	0	0	583.68	505.96	1199	0	0	0	1.00:0.87:2.05:0:0:0	1014.2	0	1014.2	0	#DIV/0!	1.00:0	31629
1767	13131	| NADH-cytochrome b5 reductase 3 isoform 2 | 1727 | CYB5R3 | 278 | P00387 | sp	NP_001123291	40.6	18	3	3		583.68	505.96	1199	0	0	0	583.68	505.96	1199	0	0	0	1.00:0.87:2.05:0:0:0	1014.2	0	1014.2	0	#DIV/0!	1.00:0	31629
1767	13133	| NADH-cytochrome b5 reductase 3 isoform 1 | 1727 | CYB5R3 | 301 | P00387 | sp	NP_000389	40.6	17	3	3		583.68	505.96	1199	0	0	0	583.68	505.96	1199	0	0	0	1.00:0.87:2.05:0:0:0	1014.2	0	1014.2	0	#DIV/0!	1.00:0	34235
95	53	| T-complex protein 1 subunit alpha isoform a | 6950 | TCP1 | 556 | P17987 | sp	NP_110379	40.56	51	22	22	Carbamidomethylation; Acetylation (Protein N-term)	21374	20691	21854	3572.9	5063.2	6044.9	6402.6	6196	5607.3	1990.1	1843.6	2188.4	1.00:0.97:0.88:0.31:0.29:0.34	22176	6602.9	6068.6	2191.3	2.76941	1.00:0.36	60344
1210	8846	| zinc finger CCCH domain-containing protein 15 | 55854 | ZC3H15 | 426 | Q8WU90 | sp	NP_060941	40.43	8	2	2		434.53	624.89	1099.1	0	0	0	434.53	624.89	1099.1	0	0	0	1.00:1.44:2.53:0:0:0	1079.3	0	1079.3	0	#DIV/0!	1.00:0	48603
1101	5638	| mitoguardin 1 isoform X3 | 374986 | MIGA1 | 600 | nan | nan	XP_016856716	40.4	8	3	3	Carbamidomethylation; Acetylation (Protein N-term)	1064.4	1452.3	2126.8	0	0	0	1064.4	1452.3	2126.8	0	0	0	1.00:1.36:2.00:0:0:0	1818.6	0	1818.6	0	#DIV/0!	1.00:0	67739
1101	5639	| mitoguardin 1 isoform X3 | 374986 | MIGA1 | 600 | nan | nan	XP_016856717	40.4	8	3	3	Carbamidomethylation; Acetylation (Protein N-term)	1064.4	1452.3	2126.8	0	0	0	1064.4	1452.3	2126.8	0	0	0	1.00:1.36:2.00:0:0:0	1818.6	0	1818.6	0	#DIV/0!	1.00:0	67739
1101	5640	| mitoguardin 1 isoform X3 | 374986 | MIGA1 | 600 | nan | nan	XP_016856719	40.4	8	3	3	Carbamidomethylation; Acetylation (Protein N-term)	1064.4	1452.3	2126.8	0	0	0	1064.4	1452.3	2126.8	0	0	0	1.00:1.36:2.00:0:0:0	1818.6	0	1818.6	0	#DIV/0!	1.00:0	67739
1101	5641	| mitoguardin 1 isoform X3 | 374986 | MIGA1 | 600 | nan | nan	XP_016856718	40.4	8	3	3	Carbamidomethylation; Acetylation (Protein N-term)	1064.4	1452.3	2126.8	0	0	0	1064.4	1452.3	2126.8	0	0	0	1.00:1.36:2.00:0:0:0	1818.6	0	1818.6	0	#DIV/0!	1.00:0	67739
1101	5642	| mitoguardin 1 isoform X2 | 374986 | MIGA1 | 601 | nan | nan	XP_005270905	40.4	8	3	3	Carbamidomethylation; Acetylation (Protein N-term)	1064.4	1452.3	2126.8	0	0	0	1064.4	1452.3	2126.8	0	0	0	1.00:1.36:2.00:0:0:0	1818.6	0	1818.6	0	#DIV/0!	1.00:0	67867
1101	5643	| mitoguardin 1 isoform X2 | 374986 | MIGA1 | 601 | nan | nan	XP_011539724	40.4	8	3	3	Carbamidomethylation; Acetylation (Protein N-term)	1064.4	1452.3	2126.8	0	0	0	1064.4	1452.3	2126.8	0	0	0	1.00:1.36:2.00:0:0:0	1818.6	0	1818.6	0	#DIV/0!	1.00:0	67867
1101	5644	| mitoguardin 1 isoform X2 | 374986 | MIGA1 | 601 | nan | nan	XP_005270904	40.4	8	3	3	Carbamidomethylation; Acetylation (Protein N-term)	1064.4	1452.3	2126.8	0	0	0	1064.4	1452.3	2126.8	0	0	0	1.00:1.36:2.00:0:0:0	1818.6	0	1818.6	0	#DIV/0!	1.00:0	67867
1923	14654	| probable U3 small nucleolar RNA-associated protein 11 isoform X1 | 51118 | UTP11 | 184 | nan | nan	XP_011539857	40.39	11	2	2		621.54	489.87	1277.8	0	0	0	621.54	489.87	1277.8	0	0	0	1.00:0.79:2.06:0:0:0	1294.4	0	1294.4	0	#DIV/0!	1.00:0	22007
1923	14655	| probable U3 small nucleolar RNA-associated protein 11 | 51118 | UTP11 | 253 | Q9Y3A2 | sp	NP_057121	40.39	8	2	2		621.54	489.87	1277.8	0	0	0	621.54	489.87	1277.8	0	0	0	1.00:0.79:2.06:0:0:0	1294.4	0	1294.4	0	#DIV/0!	1.00:0	30447
1670	16542	| cyclic AMP-responsive element-binding protein 1 isoform X5 | 1385 | CREB1 | 301 | nan | nan	XP_011508952	40.37	14	2	2		732.35	1418.8	1328.5	0	0	0	732.35	1418.8	1328.5	0	0	0	1.00:1.94:1.81:0:0:0	1350.6	0	1350.6	0	#DIV/0!	1.00:0	32512
1670	17015	| cyclic AMP-responsive element-binding protein 1 isoform X7 | 1385 | CREB1 | 287 | nan | nan	XP_011508953	40.37	15	2	2		732.35	1418.8	1328.5	0	0	0	732.35	1418.8	1328.5	0	0	0	1.00:1.94:1.81:0:0:0	1350.6	0	1350.6	0	#DIV/0!	1.00:0	30960
1670	17018	| cyclic AMP-responsive element-binding protein 1 isoform A | 1385 | CREB1 | 327 | P16220 | sp	NP_004370	40.37	13	2	2		732.35	1418.8	1328.5	0	0	0	732.35	1418.8	1328.5	0	0	0	1.00:1.94:1.81:0:0:0	1350.6	0	1350.6	0	#DIV/0!	1.00:0	35136
1670	17019	| cyclic AMP-responsive element-binding protein 1 isoform X3 | 1385 | CREB1 | 327 | P16220 | sp	XP_011508949	40.37	13	2	2		732.35	1418.8	1328.5	0	0	0	732.35	1418.8	1328.5	0	0	0	1.00:1.94:1.81:0:0:0	1350.6	0	1350.6	0	#DIV/0!	1.00:0	35136
1670	17022	| cyclic AMP-responsive element-binding protein 1 isoform B | 1385 | CREB1 | 341 | P16220 | sp	NP_604391	40.37	13	2	2		732.35	1418.8	1328.5	0	0	0	732.35	1418.8	1328.5	0	0	0	1.00:1.94:1.81:0:0:0	1350.6	0	1350.6	0	#DIV/0!	1.00:0	36688
1670	17023	| cyclic AMP-responsive element-binding protein 1 isoform X1 | 1385 | CREB1 | 341 | P16220 | sp	XP_011508947	40.37	13	2	2		732.35	1418.8	1328.5	0	0	0	732.35	1418.8	1328.5	0	0	0	1.00:1.94:1.81:0:0:0	1350.6	0	1350.6	0	#DIV/0!	1.00:0	36688
1670	17145	| cyclic AMP-responsive element-binding protein 1 isoform X2 | 1385 | CREB1 | 336 | nan | nan	XP_011508948	40.37	13	2	2		732.35	1418.8	1328.5	0	0	0	732.35	1418.8	1328.5	0	0	0	1.00:1.94:1.81:0:0:0	1350.6	0	1350.6	0	#DIV/0!	1.00:0	35769
1670	20632	| cyclic AMP-responsive element-binding protein 1 isoform X6 | 1385 | CREB1 | 294 | nan | nan	XP_016858888	40.37	15	2	2		732.35	1418.8	1328.5	0	0	0	732.35	1418.8	1328.5	0	0	0	1.00:1.94:1.81:0:0:0	1350.6	0	1350.6	0	#DIV/0!	1.00:0	31008
1670	20633	| cyclic AMP-responsive element-binding protein 1 isoform X4 | 1385 | CREB1 | 308 | nan | nan	XP_011508950	40.37	14	2	2		732.35	1418.8	1328.5	0	0	0	732.35	1418.8	1328.5	0	0	0	1.00:1.94:1.81:0:0:0	1350.6	0	1350.6	0	#DIV/0!	1.00:0	32560
875	5893	| ribonuclease P protein subunit p30 isoform b | 10556 | RPP30 | 268 | P78346 | sp	NP_006404	40.34	28	5	5	Carbamidomethylation	1601.8	1332.4	2858.3	0	0	0	1601.8	707.92	2142	0	0	0	1.00:0.44:1.34:0:0:0	2306.8	0	1636.4	0	#DIV/0!	1.00:0	29321
875	5894	| ribonuclease P protein subunit p30 isoform a | 10556 | RPP30 | 322 | P78346 | sp	NP_001098016	40.34	23	5	5	Carbamidomethylation	1601.8	1332.4	2858.3	0	0	0	1601.8	707.92	2142	0	0	0	1.00:0.44:1.34:0:0:0	2306.8	0	1636.4	0	#DIV/0!	1.00:0	35564
1982	12921	| homeobox protein Hox-B4 | 3214 | HOXB4 | 251 | P17483 | sp	NP_076920	40.27	12	2	2		493.04	800.79	1084.3	0	0	0	493.04	800.79	1084.3	0	0	0	1.00:1.62:2.20:0:0:0	870.83	0	870.83	0	#DIV/0!	1.00:0	27604
742	6684	| dihydrolipoyllysine-residue succinyltransferase component of | 1743 | DLST | 453 | P36957 | sp	NP_001924	40.17	18	6	6		11234	8997.8	10917	1865.2	1745.6	1991.2	9333.8	7770.3	9285.9	1865.2	1745.6	1991.2	1.00:0.83:0.99:0.20:0.19:0.21	10734	1867.3	8796.7	1867.3	4.71092	1.00:0.21	48755
1555	10617	| TATA box-binding protein-associated factor RNA polymerase I subunit | 9013 | TAF1C | 775 | Q15572 | sp	NP_647610	40.17	6	3	3	Carbamidomethylation	1180.1	704.26	1413.3	0	0	0	1180.1	704.26	1413.3	0	0	0	1.00:0.60:1.20:0:0:0	1265.3	0	1265.3	0	#DIV/0!	1.00:0	85045
1555	10618	| TATA box-binding protein-associated factor RNA polymerase I subunit | 9013 | TAF1C | 776 | nan | nan	XP_016879336	40.17	6	3	3	Carbamidomethylation	1180.1	704.26	1413.3	0	0	0	1180.1	704.26	1413.3	0	0	0	1.00:0.60:1.20:0:0:0	1265.3	0	1265.3	0	#DIV/0!	1.00:0	85042
1555	10619	| TATA box-binding protein-associated factor RNA polymerase I subunit | 9013 | TAF1C | 802 | nan | nan	XP_016879335	40.17	6	3	3	Carbamidomethylation	1180.1	704.26	1413.3	0	0	0	1180.1	704.26	1413.3	0	0	0	1.00:0.60:1.20:0:0:0	1265.3	0	1265.3	0	#DIV/0!	1.00:0	87971
1555	10620	| TATA box-binding protein-associated factor RNA polymerase I subunit | 9013 | TAF1C | 802 | nan | nan	XP_005256284	40.17	6	3	3	Carbamidomethylation	1180.1	704.26	1413.3	0	0	0	1180.1	704.26	1413.3	0	0	0	1.00:0.60:1.20:0:0:0	1265.3	0	1265.3	0	#DIV/0!	1.00:0	87971
1555	10621	| TATA box-binding protein-associated factor RNA polymerase I subunit | 9013 | TAF1C | 843 | Q15572 | sp	XP_016879334	40.17	6	3	3	Carbamidomethylation	1180.1	704.26	1413.3	0	0	0	1180.1	704.26	1413.3	0	0	0	1.00:0.60:1.20:0:0:0	1265.3	0	1265.3	0	#DIV/0!	1.00:0	92284
1555	10622	| TATA box-binding protein-associated factor RNA polymerase I subunit | 9013 | TAF1C | 843 | Q15572 | sp	NP_001230085	40.17	6	3	3	Carbamidomethylation	1180.1	704.26	1413.3	0	0	0	1180.1	704.26	1413.3	0	0	0	1.00:0.60:1.20:0:0:0	1265.3	0	1265.3	0	#DIV/0!	1.00:0	92344
1555	10623	| TATA box-binding protein-associated factor RNA polymerase I subunit | 9013 | TAF1C | 844 | nan | nan	XP_006721389	40.17	6	3	3	Carbamidomethylation	1180.1	704.26	1413.3	0	0	0	1180.1	704.26	1413.3	0	0	0	1.00:0.60:1.20:0:0:0	1265.3	0	1265.3	0	#DIV/0!	1.00:0	92415
1555	10624	| TATA box-binding protein-associated factor RNA polymerase I subunit | 9013 | TAF1C | 869 | Q15572 | sp	XP_005256283	40.17	5	3	3	Carbamidomethylation	1180.1	704.26	1413.3	0	0	0	1180.1	704.26	1413.3	0	0	0	1.00:0.60:1.20:0:0:0	1265.3	0	1265.3	0	#DIV/0!	1.00:0	95213
1555	10625	| TATA box-binding protein-associated factor RNA polymerase I subunit | 9013 | TAF1C | 869 | Q15572 | sp	NP_005670	40.17	5	3	3	Carbamidomethylation	1180.1	704.26	1413.3	0	0	0	1180.1	704.26	1413.3	0	0	0	1.00:0.60:1.20:0:0:0	1265.3	0	1265.3	0	#DIV/0!	1.00:0	95274
1555	10626	| TATA box-binding protein-associated factor RNA polymerase I subunit | 9013 | TAF1C | 870 | nan | nan	XP_006721388	40.17	5	3	3	Carbamidomethylation	1180.1	704.26	1413.3	0	0	0	1180.1	704.26	1413.3	0	0	0	1.00:0.60:1.20:0:0:0	1265.3	0	1265.3	0	#DIV/0!	1.00:0	95345
2061	14744	| FH1/FH2 domain-containing protein 1 isoform X3 | 29109 | FHOD1 | 1097 | nan | nan	XP_011521347	40.07	2	2	2		846.17	450.69	932.85	0	0	0	846.17	450.69	932.85	0	0	0	1.00:0.53:1.10:0:0:0	898.83	0	898.83	0	#DIV/0!	1.00:0	119317
2061	14745	| FH1/FH2 domain-containing protein 1 isoform X2 | 29109 | FHOD1 | 1136 | nan | nan	XP_011521346	40.07	2	2	2		846.17	450.69	932.85	0	0	0	846.17	450.69	932.85	0	0	0	1.00:0.53:1.10:0:0:0	898.83	0	898.83	0	#DIV/0!	1.00:0	123209
2061	14746	| FH1/FH2 domain-containing protein 1 isoform 2 | 29109 | FHOD1 | 1164 | Q9Y613 | sp	NP_037373	40.07	2	2	2		846.17	450.69	932.85	0	0	0	846.17	450.69	932.85	0	0	0	1.00:0.53:1.10:0:0:0	898.83	0	898.83	0	#DIV/0!	1.00:0	126551
2061	14747	| FH1/FH2 domain-containing protein 1 isoform X1 | 29109 | FHOD1 | 1180 | nan | nan	XP_011521345	40.07	2	2	2		846.17	450.69	932.85	0	0	0	846.17	450.69	932.85	0	0	0	1.00:0.53:1.10:0:0:0	898.83	0	898.83	0	#DIV/0!	1.00:0	128492
2061	14748	| FH1/FH2 domain-containing protein 1 isoform 1 | 29109 | FHOD1 | 1190 | A0A068F7M9 | tr	NP_001305131	40.07	2	2	2		846.17	450.69	932.85	0	0	0	846.17	450.69	932.85	0	0	0	1.00:0.53:1.10:0:0:0	898.83	0	898.83	0	#DIV/0!	1.00:0	129313
1795	10603	| phenylalanine--tRNA ligase mitochondrial isoform X3 | 10667 | FARS2 | 416 | nan | nan	XP_011512550	40.06	6	2	2		799.43	362.94	911.71	0	0	0	799.43	362.94	911.71	0	0	0	1.00:0.45:1.14:0:0:0	844.77	0	844.77	0	#DIV/0!	1.00:0	48093
1795	11846	| phenylalanine--tRNA ligase mitochondrial isoform X2 | 10667 | FARS2 | 439 | nan | nan	XP_011512549	40.06	6	2	2		799.43	362.94	911.71	0	0	0	799.43	362.94	911.71	0	0	0	1.00:0.45:1.14:0:0:0	844.77	0	844.77	0	#DIV/0!	1.00:0	50510
1795	12268	| phenylalanine--tRNA ligase mitochondrial isoform X4 | 10667 | FARS2 | 412 | nan | nan	XP_011512551	40.06	6	2	2		799.43	362.94	911.71	0	0	0	799.43	362.94	911.71	0	0	0	1.00:0.45:1.14:0:0:0	844.77	0	844.77	0	#DIV/0!	1.00:0	47761
1795	12269	| phenylalanine--tRNA ligase mitochondrial isoform X1 | 10667 | FARS2 | 451 | O95363 | sp	XP_016865675	40.06	6	2	2		799.43	362.94	911.71	0	0	0	799.43	362.94	911.71	0	0	0	1.00:0.45:1.14:0:0:0	844.77	0	844.77	0	#DIV/0!	1.00:0	52357
1795	12270	| phenylalanine--tRNA ligase mitochondrial | 10667 | FARS2 | 451 | O95363 | sp	NP_001305801	40.06	6	2	2		799.43	362.94	911.71	0	0	0	799.43	362.94	911.71	0	0	0	1.00:0.45:1.14:0:0:0	844.77	0	844.77	0	#DIV/0!	1.00:0	52357
1795	12271	| phenylalanine--tRNA ligase mitochondrial | 10667 | FARS2 | 451 | O95363 | sp	NP_006558	40.06	6	2	2		799.43	362.94	911.71	0	0	0	799.43	362.94	911.71	0	0	0	1.00:0.45:1.14:0:0:0	844.77	0	844.77	0	#DIV/0!	1.00:0	52357
1795	12272	| phenylalanine--tRNA ligase mitochondrial isoform X1 | 10667 | FARS2 | 451 | O95363 | sp	XP_016865676	40.06	6	2	2		799.43	362.94	911.71	0	0	0	799.43	362.94	911.71	0	0	0	1.00:0.45:1.14:0:0:0	844.77	0	844.77	0	#DIV/0!	1.00:0	52357
1795	12273	| phenylalanine--tRNA ligase mitochondrial isoform X1 | 10667 | FARS2 | 451 | O95363 | sp	XP_005248869	40.06	6	2	2		799.43	362.94	911.71	0	0	0	799.43	362.94	911.71	0	0	0	1.00:0.45:1.14:0:0:0	844.77	0	844.77	0	#DIV/0!	1.00:0	52357
1335	5571	| dedicator of cytokinesis protein 7 isoform 1 | 85440 | DOCK7 | 2129 | Q96N67 | sp	NP_001258928	40.03	2	3	3	Carbamidomethylation	977.35	433.83	578.3	0	0	0	977.35	433.83	578.3	0	0	0	1.00:0.44:0.59:0:0:0	1116.3	0	1116.3	0	#DIV/0!	1.00:0	241410
1335	5572	| dedicator of cytokinesis protein 7 isoform 6 | 85440 | DOCK7 | 2131 | Q96N67 | sp	NP_001317543	40.03	2	3	3	Carbamidomethylation	977.35	433.83	578.3	0	0	0	977.35	433.83	578.3	0	0	0	1.00:0.44:0.59:0:0:0	1116.3	0	1116.3	0	#DIV/0!	1.00:0	241670
1335	5573	| dedicator of cytokinesis protein 7 isoform X3 | 85440 | DOCK7 | 2135 | nan | nan	XP_011540630	40.03	2	3	3	Carbamidomethylation	977.35	433.83	578.3	0	0	0	977.35	433.83	578.3	0	0	0	1.00:0.44:0.59:0:0:0	1116.3	0	1116.3	0	#DIV/0!	1.00:0	241998
1335	5574	| dedicator of cytokinesis protein 7 isoform X2 | 85440 | DOCK7 | 2138 | nan | nan	XP_011540629	40.03	2	3	3	Carbamidomethylation	977.35	433.83	578.3	0	0	0	977.35	433.83	578.3	0	0	0	1.00:0.44:0.59:0:0:0	1116.3	0	1116.3	0	#DIV/0!	1.00:0	242298
1335	5575	| dedicator of cytokinesis protein 7 isoform X1 | 85440 | DOCK7 | 2140 | Q96N67 | sp	XP_011540628	40.03	2	3	3	Carbamidomethylation	977.35	433.83	578.3	0	0	0	977.35	433.83	578.3	0	0	0	1.00:0.44:0.59:0:0:0	1116.3	0	1116.3	0	#DIV/0!	1.00:0	242558
1335	5682	| dedicator of cytokinesis protein 7 isoform 4 | 85440 | DOCK7 | 2098 | Q96N67 | sp	NP_001258930	40.03	2	3	3	Carbamidomethylation	977.35	433.83	578.3	0	0	0	977.35	433.83	578.3	0	0	0	1.00:0.44:0.59:0:0:0	1116.3	0	1116.3	0	#DIV/0!	1.00:0	238272
1335	5683	| dedicator of cytokinesis protein 7 isoform 3 | 85440 | DOCK7 | 2100 | Q96N67 | sp	NP_001258929	40.03	2	3	3	Carbamidomethylation	977.35	433.83	578.3	0	0	0	977.35	433.83	578.3	0	0	0	1.00:0.44:0.59:0:0:0	1116.3	0	1116.3	0	#DIV/0!	1.00:0	238532
1335	5685	| dedicator of cytokinesis protein 7 isoform X4 | 85440 | DOCK7 | 2107 | nan | nan	XP_016858128	40.03	2	3	3	Carbamidomethylation	977.35	433.83	578.3	0	0	0	977.35	433.83	578.3	0	0	0	1.00:0.44:0.59:0:0:0	1116.3	0	1116.3	0	#DIV/0!	1.00:0	239160
1335	5686	| dedicator of cytokinesis protein 7 isoform 2 | 85440 | DOCK7 | 2109 | Q96N67 | sp	NP_212132	40.03	2	3	3	Carbamidomethylation	977.35	433.83	578.3	0	0	0	977.35	433.83	578.3	0	0	0	1.00:0.44:0.59:0:0:0	1116.3	0	1116.3	0	#DIV/0!	1.00:0	239420
1328	9573	| GRB10-interacting GYF protein 2 isoform c | 26058 | GIGYF2 | 1293 | Q6Y7W6 | sp	NP_001096618	40.02	2	2	2	Acetylation (Protein N-term)	523.03	1110	841.08	0	0	0	523.03	1110	841.08	0	0	0	1.00:2.12:1.61:0:0:0	957.21	0	957.21	0	#DIV/0!	1.00:0	149486
1328	9574	| GRB10-interacting GYF protein 2 isoform b | 26058 | GIGYF2 | 1299 | Q6Y7W6 | sp	NP_001096616	40.02	2	2	2	Acetylation (Protein N-term)	523.03	1110	841.08	0	0	0	523.03	1110	841.08	0	0	0	1.00:2.12:1.61:0:0:0	957.21	0	957.21	0	#DIV/0!	1.00:0	150070
1328	9575	| GRB10-interacting GYF protein 2 isoform b | 26058 | GIGYF2 | 1299 | Q6Y7W6 | sp	NP_056390	40.02	2	2	2	Acetylation (Protein N-term)	523.03	1110	841.08	0	0	0	523.03	1110	841.08	0	0	0	1.00:2.12:1.61:0:0:0	957.21	0	957.21	0	#DIV/0!	1.00:0	150070
1328	9660	| GRB10-interacting GYF protein 2 isoform a | 26058 | GIGYF2 | 1320 | Q6Y7W6 | sp	NP_001096617	40.02	2	2	2	Acetylation (Protein N-term)	523.03	1110	841.08	0	0	0	523.03	1110	841.08	0	0	0	1.00:2.12:1.61:0:0:0	957.21	0	957.21	0	#DIV/0!	1.00:0	152398
1507	10175	| protein MMS22-like isoform X2 | 253714 | MMS22L | 1221 | nan | nan	XP_011533977	39.99	2	2	2		820.6	335.15	688.52	0	0	0	820.6	335.15	688.52	0	0	0	1.00:0.41:0.84:0:0:0	717.64	0	717.64	0	#DIV/0!	1.00:0	139624
1507	10199	| protein MMS22-like isoform X3 | 253714 | MMS22L | 1035 | nan | nan	XP_011533978	39.99	2	2	2		820.6	335.15	688.52	0	0	0	820.6	335.15	688.52	0	0	0	1.00:0.41:0.84:0:0:0	717.64	0	717.64	0	#DIV/0!	1.00:0	118618
1507	10200	| protein MMS22-like isoform X3 | 253714 | MMS22L | 1035 | nan | nan	XP_016866145	39.99	2	2	2		820.6	335.15	688.52	0	0	0	820.6	335.15	688.52	0	0	0	1.00:0.41:0.84:0:0:0	717.64	0	717.64	0	#DIV/0!	1.00:0	118618
1507	10201	| protein MMS22-like isoform a | 253714 | MMS22L | 1243 | nan | nan	NP_001337528	39.99	2	2	2		820.6	335.15	688.52	0	0	0	820.6	335.15	688.52	0	0	0	1.00:0.41:0.84:0:0:0	717.64	0	717.64	0	#DIV/0!	1.00:0	142320
1507	10202	| protein MMS22-like isoform a | 253714 | MMS22L | 1243 | Q6ZRQ5 | sp	NP_940870	39.99	2	2	2		820.6	335.15	688.52	0	0	0	820.6	335.15	688.52	0	0	0	1.00:0.41:0.84:0:0:0	717.64	0	717.64	0	#DIV/0!	1.00:0	142320
1507	10203	| protein MMS22-like isoform X1 | 253714 | MMS22L | 1261 | nan | nan	XP_011533972	39.99	2	2	2		820.6	335.15	688.52	0	0	0	820.6	335.15	688.52	0	0	0	1.00:0.41:0.84:0:0:0	717.64	0	717.64	0	#DIV/0!	1.00:0	144441
1507	10204	| protein MMS22-like isoform X1 | 253714 | MMS22L | 1261 | nan | nan	XP_011533973	39.99	2	2	2		820.6	335.15	688.52	0	0	0	820.6	335.15	688.52	0	0	0	1.00:0.41:0.84:0:0:0	717.64	0	717.64	0	#DIV/0!	1.00:0	144441
1507	10205	| protein MMS22-like isoform X1 | 253714 | MMS22L | 1261 | nan | nan	XP_011533976	39.99	2	2	2		820.6	335.15	688.52	0	0	0	820.6	335.15	688.52	0	0	0	1.00:0.41:0.84:0:0:0	717.64	0	717.64	0	#DIV/0!	1.00:0	144441
1507	10206	| protein MMS22-like isoform X1 | 253714 | MMS22L | 1261 | nan | nan	XP_011533974	39.99	2	2	2		820.6	335.15	688.52	0	0	0	820.6	335.15	688.52	0	0	0	1.00:0.41:0.84:0:0:0	717.64	0	717.64	0	#DIV/0!	1.00:0	144441
1507	10516	| protein MMS22-like isoform X6 | 253714 | MMS22L | 858 | nan | nan	XP_011533981	39.99	3	2	2		820.6	335.15	688.52	0	0	0	820.6	335.15	688.52	0	0	0	1.00:0.41:0.84:0:0:0	717.64	0	717.64	0	#DIV/0!	1.00:0	97716
1507	10517	| protein MMS22-like isoform b precursor | 253714 | MMS22L | 960 | nan | nan	NP_001337529	39.99	2	2	2		820.6	335.15	688.52	0	0	0	820.6	335.15	688.52	0	0	0	1.00:0.41:0.84:0:0:0	717.64	0	717.64	0	#DIV/0!	1.00:0	109968
1507	10518	| protein MMS22-like isoform X5 | 253714 | MMS22L | 967 | nan | nan	XP_011533980	39.99	2	2	2		820.6	335.15	688.52	0	0	0	820.6	335.15	688.52	0	0	0	1.00:0.41:0.84:0:0:0	717.64	0	717.64	0	#DIV/0!	1.00:0	110777
1507	10519	| protein MMS22-like isoform X4 | 253714 | MMS22L | 978 | nan | nan	XP_011533979	39.99	2	2	2		820.6	335.15	688.52	0	0	0	820.6	335.15	688.52	0	0	0	1.00:0.41:0.84:0:0:0	717.64	0	717.64	0	#DIV/0!	1.00:0	112089
1507	10707	| protein MMS22-like isoform X7 | 253714 | MMS22L | 742 | nan | nan	XP_011533982	39.99	3	2	2		820.6	335.15	688.52	0	0	0	820.6	335.15	688.52	0	0	0	1.00:0.41:0.84:0:0:0	717.64	0	717.64	0	#DIV/0!	1.00:0	84191
1872	12440	| cohesin subunit SA-2 isoform X1 | 10735 | STAG2 | 1268 | Q8N3U4 | sp	XP_005262417	39.99	2	2	2		428	953.83	519.42	0	0	0	428	953.83	519.42	0	0	0	1.00:2.23:1.21:0:0:0	815.89	0	815.89	0	#DIV/0!	1.00:0	145751
1023	6843	| S1 RNA-binding domain-containing protein 1 isoform X1 | 55133 | SRBD1 | 979 | nan | nan	XP_011531248	39.98	3	2	2		714.27	722.88	331.29	0	0	0	714.27	722.88	331.29	0	0	0	1.00:1.01:0.46:0:0:0	688.39	0	688.39	0	#DIV/0!	1.00:0	110376
1023	6844	| S1 RNA-binding domain-containing protein 1 | 55133 | SRBD1 | 995 | Q8N5C6 | sp	NP_060549	39.98	3	2	2		714.27	722.88	331.29	0	0	0	714.27	722.88	331.29	0	0	0	1.00:1.01:0.46:0:0:0	688.39	0	688.39	0	#DIV/0!	1.00:0	111776
1182	10349	| neurochondrin isoform 1 | 23154 | NCDN | 729 | Q9UBB6 | sp	NP_055099	39.97	8	4	4	Carbamidomethylation	1535.9	1349.9	612.37	0	0	0	1212.3	1074.8	612.37	0	0	0	1.00:0.89:0.51:0:0:0	1388.4	0	1089.1	0	#DIV/0!	1.00:0	78864
1182	10350	| neurochondrin isoform 1 | 23154 | NCDN | 729 | Q9UBB6 | sp	NP_001014839	39.97	8	4	4	Carbamidomethylation	1535.9	1349.9	612.37	0	0	0	1212.3	1074.8	612.37	0	0	0	1.00:0.89:0.51:0:0:0	1388.4	0	1089.1	0	#DIV/0!	1.00:0	78864
1701	14844	| actin filament-associated protein 1 isoform X1 | 60312 | AFAP1 | 814 | Q8N556 | sp	XP_011511846	39.95	4	2	2		559.91	1056.1	1069.5	0	0	0	559.91	1056.1	1069.5	0	0	0	1.00:1.89:1.91:0:0:0	1015	0	1015	0	#DIV/0!	1.00:0	89795
1701	14845	| actin filament-associated protein 1 isoform A | 60312 | AFAP1 | 814 | Q8N556 | sp	NP_001128119	39.95	4	2	2		559.91	1056.1	1069.5	0	0	0	559.91	1056.1	1069.5	0	0	0	1.00:1.89:1.91:0:0:0	1015	0	1015	0	#DIV/0!	1.00:0	89795
1701	14879	| actin filament-associated protein 1 isoform X3 | 60312 | AFAP1 | 751 | nan | nan	XP_006713972	39.95	5	2	2		559.91	1056.1	1069.5	0	0	0	559.91	1056.1	1069.5	0	0	0	1.00:1.89:1.91:0:0:0	1015	0	1015	0	#DIV/0!	1.00:0	83210
1701	14893	| actin filament-associated protein 1 isoform B | 60312 | AFAP1 | 730 | Q8N556 | sp	NP_940997	39.95	5	2	2		559.91	1056.1	1069.5	0	0	0	559.91	1056.1	1069.5	0	0	0	1.00:1.89:1.91:0:0:0	1015	0	1015	0	#DIV/0!	1.00:0	80725
1701	14894	| actin filament-associated protein 1 isoform X2 | 60312 | AFAP1 | 748 | nan | nan	XP_016864024	39.95	5	2	2		559.91	1056.1	1069.5	0	0	0	559.91	1056.1	1069.5	0	0	0	1.00:1.89:1.91:0:0:0	1015	0	1015	0	#DIV/0!	1.00:0	82673
1701	16186	| actin filament-associated protein 1 isoform X4 | 60312 | AFAP1 | 555 | nan | nan	XP_016864025	39.95	6	2	2		559.91	1056.1	1069.5	0	0	0	559.91	1056.1	1069.5	0	0	0	1.00:1.89:1.91:0:0:0	1015	0	1015	0	#DIV/0!	1.00:0	61767
1535	14335	| cleavage and polyadenylation specificity factor subunit 4 isoform 3 | 10898 | CPSF4 | 243 | O95639 | sp	NP_001305089	39.92	17	3	3	Carbamidomethylation; Acetylation (Protein N-term)	716.19	431.53	1237.9	0	0	0	716.19	431.53	1237.9	0	0	0	1.00:0.60:1.73:0:0:0	1172.9	0	1172.9	0	#DIV/0!	1.00:0	27419
1535	14336	| cleavage and polyadenylation specificity factor subunit 4 isoform 2 | 10898 | CPSF4 | 244 | O95639 | sp	NP_001075028	39.92	17	3	3	Carbamidomethylation; Acetylation (Protein N-term)	716.19	431.53	1237.9	0	0	0	716.19	431.53	1237.9	0	0	0	1.00:0.60:1.73:0:0:0	1172.9	0	1172.9	0	#DIV/0!	1.00:0	27547
1535	14337	| cleavage and polyadenylation specificity factor subunit 4 isoform | 10898 | CPSF4 | 247 | nan | nan	XP_016867190	39.92	17	3	3	Carbamidomethylation; Acetylation (Protein N-term)	716.19	431.53	1237.9	0	0	0	716.19	431.53	1237.9	0	0	0	1.00:0.60:1.73:0:0:0	1172.9	0	1172.9	0	#DIV/0!	1.00:0	27968
1535	14338	| cleavage and polyadenylation specificity factor subunit 4 isoform | 10898 | CPSF4 | 248 | nan | nan	XP_011514059	39.92	17	3	3	Carbamidomethylation; Acetylation (Protein N-term)	716.19	431.53	1237.9	0	0	0	716.19	431.53	1237.9	0	0	0	1.00:0.60:1.73:0:0:0	1172.9	0	1172.9	0	#DIV/0!	1.00:0	27923
1535	14339	| cleavage and polyadenylation specificity factor subunit 4 isoform | 10898 | CPSF4 | 249 | nan | nan	XP_011514058	39.92	16	3	3	Carbamidomethylation; Acetylation (Protein N-term)	716.19	431.53	1237.9	0	0	0	716.19	431.53	1237.9	0	0	0	1.00:0.60:1.73:0:0:0	1172.9	0	1172.9	0	#DIV/0!	1.00:0	28052
1535	14340	| cleavage and polyadenylation specificity factor subunit 4 isoform | 10898 | CPSF4 | 252 | nan | nan	XP_016867189	39.92	16	3	3	Carbamidomethylation; Acetylation (Protein N-term)	716.19	431.53	1237.9	0	0	0	716.19	431.53	1237.9	0	0	0	1.00:0.60:1.73:0:0:0	1172.9	0	1172.9	0	#DIV/0!	1.00:0	28473
1535	14341	| cleavage and polyadenylation specificity factor subunit 4 isoform 1 | 10898 | CPSF4 | 269 | O95639 | sp	NP_006684	39.92	15	3	3	Carbamidomethylation; Acetylation (Protein N-term)	716.19	431.53	1237.9	0	0	0	716.19	431.53	1237.9	0	0	0	1.00:0.60:1.73:0:0:0	1172.9	0	1172.9	0	#DIV/0!	1.00:0	30255
1535	14342	| cleavage and polyadenylation specificity factor subunit 4 isoform | 10898 | CPSF4 | 274 | nan | nan	XP_011514057	39.92	15	3	3	Carbamidomethylation; Acetylation (Protein N-term)	716.19	431.53	1237.9	0	0	0	716.19	431.53	1237.9	0	0	0	1.00:0.60:1.73:0:0:0	1172.9	0	1172.9	0	#DIV/0!	1.00:0	30759
1283	7619	| U5 small nuclear ribonucleoprotein 40 kDa protein | 9410 | SNRNP40 | 357 | Q96DI7 | sp	NP_004805	39.92	14	3	3		1070.7	700.77	2199.9	0	0	0	1070.7	700.77	2199.9	0	0	0	1.00:0.65:2.05:0:0:0	1929	0	1929	0	#DIV/0!	1.00:0	39311
1159	8881	| mitochondrial carrier homolog 1 PSAP-LS | 23787 | MTCH1 | 372 | Q9NZJ7 | sp	NP_055156	39.89	12	4	4	Carbamidomethylation	3614.2	1975.3	2603.1	0	0	0	3614.2	1975.3	2376.4	0	0	0	1.00:0.55:0.66:0:0:0	2882	0	2655.3	0	#DIV/0!	1.00:0	39920
1159	8882	| mitochondrial carrier homolog 1 PSAP-LL | 23787 | MTCH1 | 389 | Q9NZJ7 | sp	NP_001258570	39.89	12	4	4	Carbamidomethylation	3614.2	1975.3	2603.1	0	0	0	3614.2	1975.3	2376.4	0	0	0	1.00:0.55:0.66:0:0:0	2882	0	2655.3	0	#DIV/0!	1.00:0	41544
673	5741	| G-rich sequence factor 1 isoform X1 | 2926 | GRSF1 | 561 | nan | nan	XP_005265738	39.84	26	7	7		1617.8	2135.7	5318.2	0	0	0	1617.8	2135.7	3032.5	0	0	0	1.00:1.32:1.87:0:0:0	4787.9	0	2502.3	0	#DIV/0!	1.00:0	61521
673	5996	| G-rich sequence factor 1 isoform 1 | 2926 | GRSF1 | 480 | Q12849 | sp	NP_002083	39.84	31	7	7		1617.8	2135.7	5318.2	0	0	0	1617.8	2135.7	3032.5	0	0	0	1.00:1.32:1.87:0:0:0	4787.9	0	2502.3	0	#DIV/0!	1.00:0	53136
1786	14254	| protein CMSS1 isoform 2 | 84319 | CMSS1 | 261 | Q9BQ75 | sp	NP_001161396	39.83	10	2	2		318.65	600.38	796.35	0	0	0	318.65	600.38	796.35	0	0	0	1.00:1.88:2.50:0:0:0	675.1	0	675.1	0	#DIV/0!	1.00:0	29964
1786	14255	| protein CMSS1 isoform 1 | 84319 | CMSS1 | 279 | Q9BQ75 | sp	NP_115735	39.83	9	2	2		318.65	600.38	796.35	0	0	0	318.65	600.38	796.35	0	0	0	1.00:1.88:2.50:0:0:0	675.1	0	675.1	0	#DIV/0!	1.00:0	31884
2150	15093	| probable ATP-dependent RNA helicase DDX41 isoform 2 | 51428 | DDX41 | 496 | Q9UJV9 | sp	NP_001308661	39.82	6	2	2		418.59	388.53	886.64	0	0	0	418.59	388.53	886.64	0	0	0	1.00:0.93:2.12:0:0:0	890.53	0	890.53	0	#DIV/0!	1.00:0	55410
2150	15094	| probable ATP-dependent RNA helicase DDX41 isoform 2 | 51428 | DDX41 | 496 | Q9UJV9 | sp	NP_001308759	39.82	6	2	2		418.59	388.53	886.64	0	0	0	418.59	388.53	886.64	0	0	0	1.00:0.93:2.12:0:0:0	890.53	0	890.53	0	#DIV/0!	1.00:0	55410
2150	15095	| probable ATP-dependent RNA helicase DDX41 isoform X1 | 51428 | DDX41 | 503 | nan | nan	XP_024301877	39.82	6	2	2		418.59	388.53	886.64	0	0	0	418.59	388.53	886.64	0	0	0	1.00:0.93:2.12:0:0:0	890.53	0	890.53	0	#DIV/0!	1.00:0	56100
2150	15096	| probable ATP-dependent RNA helicase DDX41 isoform 1 | 51428 | DDX41 | 622 | Q9UJV9 | sp	NP_057306	39.82	5	2	2		418.59	388.53	886.64	0	0	0	418.59	388.53	886.64	0	0	0	1.00:0.93:2.12:0:0:0	890.53	0	890.53	0	#DIV/0!	1.00:0	69838
1703	12741	| ubiquitin carboxyl-terminal hydrolase 16 isoform X2 | 10600 | USP16 | 822 | Q9Y5T5 | sp	XP_016883748	39.82	4	2	2	Carbamidomethylation	318.5	580.79	775.57	0	0	0	318.5	580.79	775.57	0	0	0	1.00:1.82:2.44:0:0:0	667	0	667	0	#DIV/0!	1.00:0	93499
1703	12742	| ubiquitin carboxyl-terminal hydrolase 16 isoform b | 10600 | USP16 | 822 | Q9Y5T5 | sp	NP_001001992	39.82	4	2	2	Carbamidomethylation	318.5	580.79	775.57	0	0	0	318.5	580.79	775.57	0	0	0	1.00:1.82:2.44:0:0:0	667	0	667	0	#DIV/0!	1.00:0	93499
1703	12743	| ubiquitin carboxyl-terminal hydrolase 16 isoform X2 | 10600 | USP16 | 822 | Q9Y5T5 | sp	XP_016883747	39.82	4	2	2	Carbamidomethylation	318.5	580.79	775.57	0	0	0	318.5	580.79	775.57	0	0	0	1.00:1.82:2.44:0:0:0	667	0	667	0	#DIV/0!	1.00:0	93499
1703	12744	| ubiquitin carboxyl-terminal hydrolase 16 isoform a | 10600 | USP16 | 823 | Q9Y5T5 | sp	NP_006438	39.82	4	2	2	Carbamidomethylation	318.5	580.79	775.57	0	0	0	318.5	580.79	775.57	0	0	0	1.00:1.82:2.44:0:0:0	667	0	667	0	#DIV/0!	1.00:0	93570
1703	12745	| ubiquitin carboxyl-terminal hydrolase 16 isoform a | 10600 | USP16 | 823 | Q9Y5T5 | sp	NP_001027582	39.82	4	2	2	Carbamidomethylation	318.5	580.79	775.57	0	0	0	318.5	580.79	775.57	0	0	0	1.00:1.82:2.44:0:0:0	667	0	667	0	#DIV/0!	1.00:0	93570
1703	12746	| ubiquitin carboxyl-terminal hydrolase 16 isoform X1 | 10600 | USP16 | 823 | Q9Y5T5 | sp	XP_016883746	39.82	4	2	2	Carbamidomethylation	318.5	580.79	775.57	0	0	0	318.5	580.79	775.57	0	0	0	1.00:1.82:2.44:0:0:0	667	0	667	0	#DIV/0!	1.00:0	93570
1692	15342	| syntaxin-binding protein 4 isoform X5 | 252983 | STXBP4 | 494 | nan | nan	XP_016879902	39.81	6	2	2		904.41	444.3	1296	0	0	0	904.41	444.3	1296	0	0	0	1.00:0.49:1.43:0:0:0	1100.6	0	1100.6	0	#DIV/0!	1.00:0	55353
1692	15786	| syntaxin-binding protein 4 | 252983 | STXBP4 | 553 | Q6ZWJ1 | sp	NP_848604	39.81	5	2	2		904.41	444.3	1296	0	0	0	904.41	444.3	1296	0	0	0	1.00:0.49:1.43:0:0:0	1100.6	0	1100.6	0	#DIV/0!	1.00:0	61662
1692	15787	| syntaxin-binding protein 4 isoform X3 | 252983 | STXBP4 | 555 | nan | nan	XP_005257244	39.81	5	2	2		904.41	444.3	1296	0	0	0	904.41	444.3	1296	0	0	0	1.00:0.49:1.43:0:0:0	1100.6	0	1100.6	0	#DIV/0!	1.00:0	61850
1692	15788	| syntaxin-binding protein 4 isoform X2 | 252983 | STXBP4 | 569 | nan | nan	XP_016879900	39.81	5	2	2		904.41	444.3	1296	0	0	0	904.41	444.3	1296	0	0	0	1.00:0.49:1.43:0:0:0	1100.6	0	1100.6	0	#DIV/0!	1.00:0	63434
1692	15789	| syntaxin-binding protein 4 isoform X1 | 252983 | STXBP4 | 571 | nan | nan	XP_016879899	39.81	5	2	2		904.41	444.3	1296	0	0	0	904.41	444.3	1296	0	0	0	1.00:0.49:1.43:0:0:0	1100.6	0	1100.6	0	#DIV/0!	1.00:0	63622
1692	15880	| syntaxin-binding protein 4 isoform X4 | 252983 | STXBP4 | 496 | nan | nan	XP_016879901	39.81	6	2	2		904.41	444.3	1296	0	0	0	904.41	444.3	1296	0	0	0	1.00:0.49:1.43:0:0:0	1100.6	0	1100.6	0	#DIV/0!	1.00:0	55062
1737	12901	| WD repeat-containing protein 74 isoform X1 | 54663 | WDR74 | 477 | nan | nan	XP_024304353	39.75	6	2	2		750.45	799.54	391	0	0	0	750.45	799.54	391	0	0	0	1.00:1.07:0.52:0:0:0	784.97	0	784.97	0	#DIV/0!	1.00:0	52598
1737	13989	| WD repeat-containing protein 74 isoform 2 | 54663 | WDR74 | 366 | Q6RFH5 | sp	NP_001294906	39.75	8	2	2		750.45	799.54	391	0	0	0	750.45	799.54	391	0	0	0	1.00:1.07:0.52:0:0:0	784.97	0	784.97	0	#DIV/0!	1.00:0	40208
1737	13990	| WD repeat-containing protein 74 isoform 1 | 54663 | WDR74 | 385 | Q6RFH5 | sp	NP_060563	39.75	8	2	2		750.45	799.54	391	0	0	0	750.45	799.54	391	0	0	0	1.00:1.07:0.52:0:0:0	784.97	0	784.97	0	#DIV/0!	1.00:0	42441
1737	13991	| WD repeat-containing protein 74 isoform X3 | 54663 | WDR74 | 385 | Q6RFH5 | sp	XP_005274112	39.75	8	2	2		750.45	799.54	391	0	0	0	750.45	799.54	391	0	0	0	1.00:1.07:0.52:0:0:0	784.97	0	784.97	0	#DIV/0!	1.00:0	42441
1737	13992	| WD repeat-containing protein 74 isoform X2 | 54663 | WDR74 | 424 | nan | nan	XP_024304354	39.75	7	2	2		750.45	799.54	391	0	0	0	750.45	799.54	391	0	0	0	1.00:1.07:0.52:0:0:0	784.97	0	784.97	0	#DIV/0!	1.00:0	47076
728	5290	| leukocyte receptor cluster member 8 isoform X5 | 114823 | LENG8 | 800 | Q96PV6 | sp	XP_011524717	39.72	12	6	6	Carbamidomethylation	1341.7	1172.6	2605.4	0	0	0	1189.9	739.07	1449.7	0	0	0	1.00:0.62:1.22:0:0:0	2159.6	0	1261.2	0	#DIV/0!	1.00:0	88157
728	5291	| leukocyte receptor cluster member 8 | 114823 | LENG8 | 800 | Q96PV6 | sp	NP_443157	39.72	12	6	6	Carbamidomethylation	1341.7	1172.6	2605.4	0	0	0	1189.9	739.07	1449.7	0	0	0	1.00:0.62:1.22:0:0:0	2159.6	0	1261.2	0	#DIV/0!	1.00:0	88157
1249	9752	| lysophospholipid acyltransferase 7 isoform 3 | 79143 | MBOAT7 | 344 | Q96N66 | sp	NP_001139554	39.71	12	3	3	Carbamidomethylation	1076.2	1092.2	1936.9	0	0	0	1076.2	1092.2	1936.9	0	0	0	1.00:1.01:1.80:0:0:0	1785.8	0	1785.8	0	#DIV/0!	1.00:0	38470
1249	9753	| lysophospholipid acyltransferase 7 isoform X2 | 79143 | MBOAT7 | 345 | nan | nan	XP_016882785	39.71	12	3	3	Carbamidomethylation	1076.2	1092.2	1936.9	0	0	0	1076.2	1092.2	1936.9	0	0	0	1.00:1.01:1.80:0:0:0	1785.8	0	1785.8	0	#DIV/0!	1.00:0	38583
1249	9754	| lysophospholipid acyltransferase 7 isoform 1 | 79143 | MBOAT7 | 472 | Q96N66 | sp	NP_077274	39.71	9	3	3	Carbamidomethylation	1076.2	1092.2	1936.9	0	0	0	1076.2	1092.2	1936.9	0	0	0	1.00:1.01:1.80:0:0:0	1785.8	0	1785.8	0	#DIV/0!	1.00:0	52765
1249	9755	| lysophospholipid acyltransferase 7 isoform X1 | 79143 | MBOAT7 | 472 | Q96N66 | sp	XP_011525602	39.71	9	3	3	Carbamidomethylation	1076.2	1092.2	1936.9	0	0	0	1076.2	1092.2	1936.9	0	0	0	1.00:1.01:1.80:0:0:0	1785.8	0	1785.8	0	#DIV/0!	1.00:0	52765
1249	9756	| lysophospholipid acyltransferase 7 isoform X1 | 79143 | MBOAT7 | 472 | Q96N66 | sp	XP_011525601	39.71	9	3	3	Carbamidomethylation	1076.2	1092.2	1936.9	0	0	0	1076.2	1092.2	1936.9	0	0	0	1.00:1.01:1.80:0:0:0	1785.8	0	1785.8	0	#DIV/0!	1.00:0	52765
1599	13461	| perilipin-2 | 123 | PLIN2 | 437 | Q99541 | sp	NP_001113	39.7	7	2	2		693.24	328.79	663.54	0	0	0	693.24	328.79	663.54	0	0	0	1.00:0.47:0.96:0:0:0	701.47	0	701.47	0	#DIV/0!	1.00:0	48075
1599	13462	| perilipin-2 isoform X1 | 123 | PLIN2 | 445 | nan | nan	XP_016869748	39.7	7	2	2		693.24	328.79	663.54	0	0	0	693.24	328.79	663.54	0	0	0	1.00:0.47:0.96:0:0:0	701.47	0	701.47	0	#DIV/0!	1.00:0	48719
615	4480	| heterogeneous nuclear ribonucleoprotein L-like isoform 2 | 92906 | HNRNPLL | 537 | Q8WVV9 | sp	NP_001136122	39.67	29	10	10	Carbamidomethylation	4039.9	4114.8	6448.5	0	0	0	1972	1976.3	3366.4	0	0	0	1.00:1.00:1.71:0:0:0	6249.4	0	3037.3	0	#DIV/0!	1.00:0	59648
615	4481	| heterogeneous nuclear ribonucleoprotein L-like isoform 1 | 92906 | HNRNPLL | 542 | Q8WVV9 | sp	NP_612403	39.67	28	10	10	Carbamidomethylation	4039.9	4114.8	6448.5	0	0	0	1972	1976.3	3366.4	0	0	0	1.00:1.00:1.71:0:0:0	6249.4	0	3037.3	0	#DIV/0!	1.00:0	60083
615	4482	| heterogeneous nuclear ribonucleoprotein L-like isoform X4 | 92906 | HNRNPLL | 570 | nan | nan	XP_011531468	39.67	27	10	10	Carbamidomethylation	4039.9	4114.8	6448.5	0	0	0	1972	1976.3	3366.4	0	0	0	1.00:1.00:1.71:0:0:0	6249.4	0	3037.3	0	#DIV/0!	1.00:0	63778
615	4483	| heterogeneous nuclear ribonucleoprotein L-like isoform X2 | 92906 | HNRNPLL | 590 | nan | nan	XP_005264697	39.67	26	10	10	Carbamidomethylation	4039.9	4114.8	6448.5	0	0	0	1972	1976.3	3366.4	0	0	0	1.00:1.00:1.71:0:0:0	6249.4	0	3037.3	0	#DIV/0!	1.00:0	66033
615	4484	| heterogeneous nuclear ribonucleoprotein L-like isoform X1 | 92906 | HNRNPLL | 595 | nan | nan	XP_005264696	39.67	26	10	10	Carbamidomethylation	4039.9	4114.8	6448.5	0	0	0	1972	1976.3	3366.4	0	0	0	1.00:1.00:1.71:0:0:0	6249.4	0	3037.3	0	#DIV/0!	1.00:0	66469
1900	21070	| core histone macro-H2A.1 isoform X6 | 9555 | H2AFY | 266 | nan | nan	XP_024302031	39.66	12	2	2		368.91	390.8	833.93	0	0	0	368.91	390.8	833.93	0	0	0	1.00:1.06:2.26:0:0:0	796.82	0	796.82	0	#DIV/0!	1.00:0	28177
1900	21071	| core histone macro-H2A.1 isoform X5 | 9555 | H2AFY | 269 | nan | nan	XP_011542034	39.66	12	2	2		368.91	390.8	833.93	0	0	0	368.91	390.8	833.93	0	0	0	1.00:1.06:2.26:0:0:0	796.82	0	796.82	0	#DIV/0!	1.00:0	28610
1900	21072	| core histone macro-H2A.1 isoform X4 | 9555 | H2AFY | 270 | nan | nan	XP_011542033	39.66	12	2	2		368.91	390.8	833.93	0	0	0	368.91	390.8	833.93	0	0	0	1.00:1.06:2.26:0:0:0	796.82	0	796.82	0	#DIV/0!	1.00:0	28738
1900	21073	| core histone macro-H2A.1 isoform X3 | 9555 | H2AFY | 368 | nan | nan	XP_005272189	39.66	9	2	2		368.91	390.8	833.93	0	0	0	368.91	390.8	833.93	0	0	0	1.00:1.06:2.26:0:0:0	796.82	0	796.82	0	#DIV/0!	1.00:0	39055
1900	21074	| core histone macro-H2A.1 isoform 1 | 9555 | H2AFY | 369 | O75367 | sp	NP_613075	39.66	9	2	2		368.91	390.8	833.93	0	0	0	368.91	390.8	833.93	0	0	0	1.00:1.06:2.26:0:0:0	796.82	0	796.82	0	#DIV/0!	1.00:0	39184
1900	21075	| core histone macro-H2A.1 isoform 2 | 9555 | H2AFY | 371 | O75367 | sp	NP_001035248	39.66	9	2	2		368.91	390.8	833.93	0	0	0	368.91	390.8	833.93	0	0	0	1.00:1.06:2.26:0:0:0	796.82	0	796.82	0	#DIV/0!	1.00:0	39489
1900	21076	| core histone macro-H2A.1 isoform 2 | 9555 | H2AFY | 371 | O75367 | sp	NP_004884	39.66	9	2	2		368.91	390.8	833.93	0	0	0	368.91	390.8	833.93	0	0	0	1.00:1.06:2.26:0:0:0	796.82	0	796.82	0	#DIV/0!	1.00:0	39489
1900	21077	| core histone macro-H2A.1 isoform X2 | 9555 | H2AFY | 371 | O75367 | sp	XP_011542032	39.66	9	2	2		368.91	390.8	833.93	0	0	0	368.91	390.8	833.93	0	0	0	1.00:1.06:2.26:0:0:0	796.82	0	796.82	0	#DIV/0!	1.00:0	39489
1900	21078	| core histone macro-H2A.1 isoform X1 | 9555 | H2AFY | 372 | O75367 | sp	XP_011542031	39.66	9	2	2		368.91	390.8	833.93	0	0	0	368.91	390.8	833.93	0	0	0	1.00:1.06:2.26:0:0:0	796.82	0	796.82	0	#DIV/0!	1.00:0	39617
1900	21079	| core histone macro-H2A.1 isoform 3 | 9555 | H2AFY | 372 | O75367 | sp	NP_613258	39.66	9	2	2		368.91	390.8	833.93	0	0	0	368.91	390.8	833.93	0	0	0	1.00:1.06:2.26:0:0:0	796.82	0	796.82	0	#DIV/0!	1.00:0	39617
1677	16560	| G2/mitotic-specific cyclin-B1 isoform 3 | 891 | CCNB1 | 380 | nan | nan	NP_001341774	39.64	8	2	2		555.73	341.73	934.82	0	0	0	555.73	341.73	934.82	0	0	0	1.00:0.61:1.68:0:0:0	714.16	0	714.16	0	#DIV/0!	1.00:0	41965
1677	16562	| G2/mitotic-specific cyclin-B1 isoform 1 | 891 | CCNB1 | 433 | P14635 | sp	NP_114172	39.64	7	2	2		555.73	341.73	934.82	0	0	0	555.73	341.73	934.82	0	0	0	1.00:0.61:1.68:0:0:0	714.16	0	714.16	0	#DIV/0!	1.00:0	48337
1677	17212	| G2/mitotic-specific cyclin-B1 isoform 2 | 891 | CCNB1 | 396 | nan | nan	NP_001341773	39.64	8	2	2		555.73	341.73	934.82	0	0	0	555.73	341.73	934.82	0	0	0	1.00:0.61:1.68:0:0:0	714.16	0	714.16	0	#DIV/0!	1.00:0	44103
1558	12107	| acyl-protein thioesterase 1 isoform X4 | 10434 | LYPLA1 | 166 | A0A087X1K9 | tr	XP_016868448	39.63	34	4	4	Carbamidomethylation	2504	1192.1	2418	0	0	0	2185.8	1192.1	1931.9	0	0	0	1.00:0.55:0.88:0:0:0	2347.4	0	1945.2	0	#DIV/0!	1.00:0	17981
1558	12108	| acyl-protein thioesterase 1 isoform 6 | 10434 | LYPLA1 | 166 | O75608 | sp	NP_001266289	39.63	34	4	4	Carbamidomethylation	2504	1192.1	2418	0	0	0	2185.8	1192.1	1931.9	0	0	0	1.00:0.55:0.88:0:0:0	2347.4	0	1945.2	0	#DIV/0!	1.00:0	17981
1558	12109	| acyl-protein thioesterase 1 isoform X4 | 10434 | LYPLA1 | 166 | A0A087X1K9 | tr	XP_016868449	39.63	34	4	4	Carbamidomethylation	2504	1192.1	2418	0	0	0	2185.8	1192.1	1931.9	0	0	0	1.00:0.55:0.88:0:0:0	2347.4	0	1945.2	0	#DIV/0!	1.00:0	17981
1558	12110	| acyl-protein thioesterase 1 isoform X2 | 10434 | LYPLA1 | 181 | nan | nan	XP_016868446	39.63	31	4	4	Carbamidomethylation	2504	1192.1	2418	0	0	0	2185.8	1192.1	1931.9	0	0	0	1.00:0.55:0.88:0:0:0	2347.4	0	1945.2	0	#DIV/0!	1.00:0	19662
1558	12111	| acyl-protein thioesterase 1 isoform X2 | 10434 | LYPLA1 | 181 | nan | nan	XP_005251184	39.63	31	4	4	Carbamidomethylation	2504	1192.1	2418	0	0	0	2185.8	1192.1	1931.9	0	0	0	1.00:0.55:0.88:0:0:0	2347.4	0	1945.2	0	#DIV/0!	1.00:0	19662
1558	12112	| acyl-protein thioesterase 1 isoform 5 | 10434 | LYPLA1 | 181 | O75608 | sp	NP_001266288	39.63	31	4	4	Carbamidomethylation	2504	1192.1	2418	0	0	0	2185.8	1192.1	1931.9	0	0	0	1.00:0.55:0.88:0:0:0	2347.4	0	1945.2	0	#DIV/0!	1.00:0	19662
1558	12117	| acyl-protein thioesterase 1 isoform X1 | 10434 | LYPLA1 | 208 | nan | nan	XP_016868445	39.63	27	4	4	Carbamidomethylation	2504	1192.1	2418	0	0	0	2185.8	1192.1	1931.9	0	0	0	1.00:0.55:0.88:0:0:0	2347.4	0	1945.2	0	#DIV/0!	1.00:0	22236
1558	12118	| acyl-protein thioesterase 1 isoform 3 | 10434 | LYPLA1 | 214 | O75608 | sp	NP_001266286	39.63	26	4	4	Carbamidomethylation	2504	1192.1	2418	0	0	0	2185.8	1192.1	1931.9	0	0	0	1.00:0.55:0.88:0:0:0	2347.4	0	1945.2	0	#DIV/0!	1.00:0	22875
1558	12121	| acyl-protein thioesterase 1 isoform 1 | 10434 | LYPLA1 | 230 | O75608 | sp	NP_006321	39.63	24	4	4	Carbamidomethylation	2504	1192.1	2418	0	0	0	2185.8	1192.1	1931.9	0	0	0	1.00:0.55:0.88:0:0:0	2347.4	0	1945.2	0	#DIV/0!	1.00:0	24670
836	7836	| 14-3-3 protein beta/alpha | 7529 | YWHAB | 246 | P31946 | sp	NP_003395	39.61	20	3	3		634.9	924.26	1289.2	0	0	0	634.9	924.26	1289.2	0	0	0	1.00:1.46:2.03:0:0:0	1119.6	0	1119.6	0	#DIV/0!	1.00:0	28082
836	7837	| 14-3-3 protein beta/alpha | 7529 | YWHAB | 246 | P31946 | sp	NP_647539	39.61	20	3	3		634.9	924.26	1289.2	0	0	0	634.9	924.26	1289.2	0	0	0	1.00:1.46:2.03:0:0:0	1119.6	0	1119.6	0	#DIV/0!	1.00:0	28082
836	7838	| 14-3-3 protein beta/alpha isoform X1 | 7529 | YWHAB | 246 | P31946 | sp	XP_016883528	39.61	20	3	3		634.9	924.26	1289.2	0	0	0	634.9	924.26	1289.2	0	0	0	1.00:1.46:2.03:0:0:0	1119.6	0	1119.6	0	#DIV/0!	1.00:0	28082
1875	18385	| sorbitol dehydrogenase | 6652 | SORD | 357 | Q00796 | sp	NP_003095	39.61	10	2	2	Acetylation (Protein N-term)	1102.8	884.03	542.57	0	0	0	1102.8	884.03	542.57	0	0	0	1.00:0.80:0.49:0:0:0	994.9	0	994.9	0	#DIV/0!	1.00:0	38325
1889	15165	| mediator of RNA polymerase II transcription subunit 29 isoform 1 | 55588 | MED29 | 221 | Q9NX70 | sp	NP_060062	39.6	13	2	2	Carbamidomethylation	285.66	626.04	628.62	0	0	0	285.66	626.04	628.62	0	0	0	1.00:2.19:2.20:0:0:0	608.06	0	608.06	0	#DIV/0!	1.00:0	23473
1341	11264	| BAG family molecular chaperone regulator 2 | 9532 | BAG2 | 211 | O95816 | sp	NP_004273	39.59	23	4	4	Carbamidomethylation	4028.3	2892.5	3411.1	503.64	514.69	630.95	3342.9	2540.6	2822.6	503.64	514.69	630.95	1.00:0.76:0.84:0.15:0.15:0.19	3608.5	549.76	3066.5	549.76	5.57789	1.00:0.18	23772
1587	12908	| vacuolar protein sorting-associated protein 16 homolog isoform 3 | 64601 | VPS16 | 695 | Q9H269 | sp	NP_536338	39.59	6	3	3	Carbamidomethylation	1094.3	532.48	839.58	0	0	0	1094.3	532.48	839.58	0	0	0	1.00:0.49:0.77:0:0:0	1355.2	0	1355.2	0	#DIV/0!	1.00:0	78300
1587	13135	| vacuolar protein sorting-associated protein 16 homolog isoform 1 | 64601 | VPS16 | 839 | Q9H269 | sp	NP_072097	39.59	5	3	3	Carbamidomethylation	1094.3	532.48	839.58	0	0	0	1094.3	532.48	839.58	0	0	0	1.00:0.49:0.77:0:0:0	1355.2	0	1355.2	0	#DIV/0!	1.00:0	94694
1614	9410	| protein SOGA1 isoform 1 | 140710 | SOGA1 | 1661 | O94964 | sp	NP_542194	39.56	2	2	2		288.97	661.07	569.45	0	0	0	288.97	661.07	569.45	0	0	0	1.00:2.29:1.97:0:0:0	623.15	0	623.15	0	#DIV/0!	1.00:0	183857
1815	15783	| putative oxidoreductase GLYR1 isoform 5 | 84656 | GLYR1 | 558 | D3DUE6 | tr	NP_001311027	39.55	6	2	2		1047.7	558.8	535.67	0	0	0	1047.7	558.8	535.67	0	0	0	1.00:0.53:0.51:0:0:0	794.54	0	794.54	0	#DIV/0!	1.00:0	60986
1815	15951	| putative oxidoreductase GLYR1 isoform 3 | 84656 | GLYR1 | 488 | nan | nan	NP_001311025	39.55	6	2	2		1047.7	558.8	535.67	0	0	0	1047.7	558.8	535.67	0	0	0	1.00:0.53:0.51:0:0:0	794.54	0	794.54	0	#DIV/0!	1.00:0	53137
1815	15952	| putative oxidoreductase GLYR1 isoform 4 | 84656 | GLYR1 | 494 | nan | nan	NP_001311026	39.55	6	2	2		1047.7	558.8	535.67	0	0	0	1047.7	558.8	535.67	0	0	0	1.00:0.53:0.51:0:0:0	794.54	0	794.54	0	#DIV/0!	1.00:0	53857
1815	17142	| putative oxidoreductase GLYR1 isoform X7 | 84656 | GLYR1 | 467 | nan | nan	XP_016879278	39.55	7	2	2		1047.7	558.8	535.67	0	0	0	1047.7	558.8	535.67	0	0	0	1.00:0.53:0.51:0:0:0	794.54	0	794.54	0	#DIV/0!	1.00:0	50631
1815	17298	| putative oxidoreductase GLYR1 isoform X6 | 84656 | GLYR1 | 478 | nan | nan	XP_016879277	39.55	6	2	2		1047.7	558.8	535.67	0	0	0	1047.7	558.8	535.67	0	0	0	1.00:0.53:0.51:0:0:0	794.54	0	794.54	0	#DIV/0!	1.00:0	51830
1815	17300	| putative oxidoreductase GLYR1 isoform X5 | 84656 | GLYR1 | 484 | Q49A26 | sp	XP_011521019	39.55	6	2	2		1047.7	558.8	535.67	0	0	0	1047.7	558.8	535.67	0	0	0	1.00:0.53:0.51:0:0:0	794.54	0	794.54	0	#DIV/0!	1.00:0	52550
1815	17320	| putative oxidoreductase GLYR1 isoform X2 | 84656 | GLYR1 | 580 | nan | nan	XP_016879276	39.55	5	2	2		1047.7	558.8	535.67	0	0	0	1047.7	558.8	535.67	0	0	0	1.00:0.53:0.51:0:0:0	794.54	0	794.54	0	#DIV/0!	1.00:0	63099
1815	17619	| putative oxidoreductase GLYR1 isoform 2 | 84656 | GLYR1 | 547 | Q49A26 | sp	NP_001295025	39.55	6	2	2		1047.7	558.8	535.67	0	0	0	1047.7	558.8	535.67	0	0	0	1.00:0.53:0.51:0:0:0	794.54	0	794.54	0	#DIV/0!	1.00:0	59828
1815	17620	| putative oxidoreductase GLYR1 isoform X3 | 84656 | GLYR1 | 548 | nan | nan	XP_011521018	39.55	6	2	2		1047.7	558.8	535.67	0	0	0	1047.7	558.8	535.67	0	0	0	1.00:0.53:0.51:0:0:0	794.54	0	794.54	0	#DIV/0!	1.00:0	60108
1815	17622	| putative oxidoreductase GLYR1 isoform 1 | 84656 | GLYR1 | 553 | Q49A26 | sp	NP_115958	39.55	6	2	2		1047.7	558.8	535.67	0	0	0	1047.7	558.8	535.67	0	0	0	1.00:0.53:0.51:0:0:0	794.54	0	794.54	0	#DIV/0!	1.00:0	60547
1815	18569	| putative oxidoreductase GLYR1 isoform X4 | 84656 | GLYR1 | 505 | nan | nan	XP_005255696	39.55	6	2	2		1047.7	558.8	535.67	0	0	0	1047.7	558.8	535.67	0	0	0	1.00:0.53:0.51:0:0:0	794.54	0	794.54	0	#DIV/0!	1.00:0	54771
1074	5382	| receptor-interacting serine/threonine-protein kinase 2 | 8767 | RIPK2 | 540 | O43353 | sp	NP_003812	39.53	14	5	5	Carbamidomethylation	2193.2	1999.1	2202	339.34	0	316.26	1794.8	1677	1518.4	339.34	0	316.26	1.00:0.93:0.85:0.19:0:0.18	2301.8	327.8	1663.4	327.8	5.07444	1.00:0.20	61195
1074	5867	| receptor-interacting serine/threonine-protein kinase 2 isoform X1 | 8767 | RIPK2 | 403 | O43353 | sp	XP_005251149	39.53	19	5	5	Carbamidomethylation	2193.2	1999.1	2202	339.34	0	316.26	1794.8	1677	1518.4	339.34	0	316.26	1.00:0.93:0.85:0.19:0:0.18	2301.8	327.8	1663.4	327.8	5.07444	1.00:0.20	45582
1074	6068	| receptor-interacting serine/threonine-protein kinase 2 isoform X2 | 8767 | RIPK2 | 369 | nan | nan	XP_011515659	39.53	21	5	5	Carbamidomethylation	2193.2	1999.1	2202	339.34	0	316.26	1794.8	1677	1518.4	339.34	0	316.26	1.00:0.93:0.85:0.19:0:0.18	2301.8	327.8	1663.4	327.8	5.07444	1.00:0.20	41571
1897	11946	| AP-1 complex subunit gamma-1 isoform b | 164 | AP1G1 | 822 | O43747 | sp	NP_001119	39.52	2	1	1	Carbamidomethylation	417.23	406.91	835.68	0	0	0	417.23	406.91	835.68	0	0	0	1.00:0.98:2.00:0:0:0	553.27	0	553.27	0	#DIV/0!	1.00:0	91351
1897	11948	| AP-1 complex subunit gamma-1 isoform a | 164 | AP1G1 | 825 | O43747 | sp	NP_001025178	39.52	2	1	1	Carbamidomethylation	417.23	406.91	835.68	0	0	0	417.23	406.91	835.68	0	0	0	1.00:0.98:2.00:0:0:0	553.27	0	553.27	0	#DIV/0!	1.00:0	91723
1373	12082	| m7GpppX diphosphatase isoform 2 | 28960 | DCPS | 337 | Q96C86 | sp	NP_054745	39.51	9	2	2		901.71	501.49	977.97	0	0	0	901.71	501.49	977.97	0	0	0	1.00:0.56:1.08:0:0:0	916.41	0	916.41	0	#DIV/0!	1.00:0	38609
1313	10729	| synaptic functional regulator FMR1 isoform ISO9 | 2332 | FMR1 | 586 | Q06787 | sp	NP_001172011	39.45	5	2	2		328.32	378.6	772.17	0	0	0	328.32	378.6	772.17	0	0	0	1.00:1.15:2.35:0:0:0	798.44	0	798.44	0	#DIV/0!	1.00:0	66246
1313	10731	| synaptic functional regulator FMR1 isoform ISO7 | 2332 | FMR1 | 611 | Q06787 | sp	NP_001172005	39.45	4	2	2		328.32	378.6	772.17	0	0	0	328.32	378.6	772.17	0	0	0	1.00:1.15:2.35:0:0:0	798.44	0	798.44	0	#DIV/0!	1.00:0	68966
1313	10732	| synaptic functional regulator FMR1 isoform ISO1 | 2332 | FMR1 | 632 | Q06787 | sp	NP_002015	39.45	4	2	2		328.32	378.6	772.17	0	0	0	328.32	378.6	772.17	0	0	0	1.00:1.15:2.35:0:0:0	798.44	0	798.44	0	#DIV/0!	1.00:0	71175
1062	5387	| dipeptidyl peptidase 9 isoform X3 | 91039 | DPP9 | 863 | nan | nan	XP_024307538	39.37	5	2	2		407.88	708.3	838.78	0	0	0	407.88	708.3	838.78	0	0	0	1.00:1.74:2.06:0:0:0	798.79	0	798.79	0	#DIV/0!	1.00:0	98263
1062	5388	| dipeptidyl peptidase 9 isoform X3 | 91039 | DPP9 | 863 | Q86TI2 | sp	XP_011526712	39.37	5	2	2		407.88	708.3	838.78	0	0	0	407.88	708.3	838.78	0	0	0	1.00:1.74:2.06:0:0:0	798.79	0	798.79	0	#DIV/0!	1.00:0	98263
1062	5411	| dipeptidyl peptidase 9 | 91039 | DPP9 | 892 | Q86TI2 | sp	NP_631898	39.37	5	2	2		407.88	708.3	838.78	0	0	0	407.88	708.3	838.78	0	0	0	1.00:1.74:2.06:0:0:0	798.79	0	798.79	0	#DIV/0!	1.00:0	101669
1062	5412	| dipeptidyl peptidase 9 isoform X2 | 91039 | DPP9 | 892 | Q86TI2 | sp	XP_011526710	39.37	5	2	2		407.88	708.3	838.78	0	0	0	407.88	708.3	838.78	0	0	0	1.00:1.74:2.06:0:0:0	798.79	0	798.79	0	#DIV/0!	1.00:0	101669
1062	5413	| dipeptidyl peptidase 9 isoform X2 | 91039 | DPP9 | 892 | Q86TI2 | sp	XP_005259730	39.37	5	2	2		407.88	708.3	838.78	0	0	0	407.88	708.3	838.78	0	0	0	1.00:1.74:2.06:0:0:0	798.79	0	798.79	0	#DIV/0!	1.00:0	101669
1062	5516	| dipeptidyl peptidase 9 isoform X1 | 91039 | DPP9 | 946 | nan | nan	XP_016882943	39.37	4	2	2		407.88	708.3	838.78	0	0	0	407.88	708.3	838.78	0	0	0	1.00:1.74:2.06:0:0:0	798.79	0	798.79	0	#DIV/0!	1.00:0	107571
1062	5517	| dipeptidyl peptidase 9 isoform X1 | 91039 | DPP9 | 946 | nan | nan	XP_011526708	39.37	4	2	2		407.88	708.3	838.78	0	0	0	407.88	708.3	838.78	0	0	0	1.00:1.74:2.06:0:0:0	798.79	0	798.79	0	#DIV/0!	1.00:0	107571
1062	5518	| dipeptidyl peptidase 9 isoform X1 | 91039 | DPP9 | 946 | nan | nan	XP_016882942	39.37	4	2	2		407.88	708.3	838.78	0	0	0	407.88	708.3	838.78	0	0	0	1.00:1.74:2.06:0:0:0	798.79	0	798.79	0	#DIV/0!	1.00:0	107571
1062	5519	| dipeptidyl peptidase 9 isoform X1 | 91039 | DPP9 | 946 | nan | nan	XP_011526707	39.37	4	2	2		407.88	708.3	838.78	0	0	0	407.88	708.3	838.78	0	0	0	1.00:1.74:2.06:0:0:0	798.79	0	798.79	0	#DIV/0!	1.00:0	107571
471	2186	| signal recognition particle receptor subunit alpha isoform X1 | 6734 | SRPRA | 634 | nan | nan	XP_016873668	39.37	27	13	13	Carbamidomethylation	9038.5	7093.6	10850	0	609.36	805.1	4630.5	3992.5	5147.5	0	403.17	444.7	1.00:0.86:1.11:0:0.09:0.10	10087	707.23	4590.2	423.94	10.8275	1.00:0.09	69819
471	2187	| signal recognition particle receptor subunit alpha isoform 1 | 6734 | SRPRA | 638 | P08240 | sp	NP_003130	39.37	27	13	13	Carbamidomethylation	9038.5	7093.6	10850	0	609.36	805.1	4630.5	3992.5	5147.5	0	403.17	444.7	1.00:0.86:1.11:0:0.09:0.10	10087	707.23	4590.2	423.94	10.8275	1.00:0.09	69811
1546	9501	| 14-3-3 protein eta | 7533 | YWHAH | 246 | Q04917 | sp	NP_003396	39.34	6	1	1		641.54	488.53	1011.3	0	0	0	641.54	488.53	1011.3	0	0	0	1.00:0.76:1.58:0:0:0	713.79	0	713.79	0	#DIV/0!	1.00:0	28219
1562	13692	| zinc finger and BTB domain-containing protein 21 isoform L | 49854 | ZBTB21 | 1066 | Q9ULJ3 | sp	NP_001307660	39.3	4	2	2		362.89	792.92	478.29	0	0	0	362.89	792.92	478.29	0	0	0	1.00:2.19:1.32:0:0:0	784.39	0	784.39	0	#DIV/0!	1.00:0	118870
1562	13693	| zinc finger and BTB domain-containing protein 21 isoform X1 | 49854 | ZBTB21 | 1066 | Q9ULJ3 | sp	XP_011527890	39.3	4	2	2		362.89	792.92	478.29	0	0	0	362.89	792.92	478.29	0	0	0	1.00:2.19:1.32:0:0:0	784.39	0	784.39	0	#DIV/0!	1.00:0	118870
1562	13694	| zinc finger and BTB domain-containing protein 21 isoform X1 | 49854 | ZBTB21 | 1066 | Q9ULJ3 | sp	XP_011527892	39.3	4	2	2		362.89	792.92	478.29	0	0	0	362.89	792.92	478.29	0	0	0	1.00:2.19:1.32:0:0:0	784.39	0	784.39	0	#DIV/0!	1.00:0	118870
1562	13695	| zinc finger and BTB domain-containing protein 21 isoform X1 | 49854 | ZBTB21 | 1066 | Q9ULJ3 | sp	XP_005261178	39.3	4	2	2		362.89	792.92	478.29	0	0	0	362.89	792.92	478.29	0	0	0	1.00:2.19:1.32:0:0:0	784.39	0	784.39	0	#DIV/0!	1.00:0	118870
1562	13696	| zinc finger and BTB domain-containing protein 21 isoform L | 49854 | ZBTB21 | 1066 | Q9ULJ3 | sp	NP_065778	39.3	4	2	2		362.89	792.92	478.29	0	0	0	362.89	792.92	478.29	0	0	0	1.00:2.19:1.32:0:0:0	784.39	0	784.39	0	#DIV/0!	1.00:0	118870
1562	13697	| zinc finger and BTB domain-containing protein 21 isoform L | 49854 | ZBTB21 | 1066 | Q9ULJ3 | sp	NP_001091872	39.3	4	2	2		362.89	792.92	478.29	0	0	0	362.89	792.92	478.29	0	0	0	1.00:2.19:1.32:0:0:0	784.39	0	784.39	0	#DIV/0!	1.00:0	118870
1562	13698	| zinc finger and BTB domain-containing protein 21 isoform X1 | 49854 | ZBTB21 | 1066 | Q9ULJ3 | sp	XP_016883849	39.3	4	2	2		362.89	792.92	478.29	0	0	0	362.89	792.92	478.29	0	0	0	1.00:2.19:1.32:0:0:0	784.39	0	784.39	0	#DIV/0!	1.00:0	118870
1562	13699	| zinc finger and BTB domain-containing protein 21 isoform X1 | 49854 | ZBTB21 | 1066 | Q9ULJ3 | sp	XP_016883850	39.3	4	2	2		362.89	792.92	478.29	0	0	0	362.89	792.92	478.29	0	0	0	1.00:2.19:1.32:0:0:0	784.39	0	784.39	0	#DIV/0!	1.00:0	118870
1562	14016	| zinc finger and BTB domain-containing protein 21 isoform S | 49854 | ZBTB21 | 865 | Q9ULJ3 | sp	NP_001091873	39.3	4	2	2		362.89	792.92	478.29	0	0	0	362.89	792.92	478.29	0	0	0	1.00:2.19:1.32:0:0:0	784.39	0	784.39	0	#DIV/0!	1.00:0	95807
1562	14017	| zinc finger and BTB domain-containing protein 21 isoform S | 49854 | ZBTB21 | 865 | Q9ULJ3 | sp	NP_001307658	39.3	4	2	2		362.89	792.92	478.29	0	0	0	362.89	792.92	478.29	0	0	0	1.00:2.19:1.32:0:0:0	784.39	0	784.39	0	#DIV/0!	1.00:0	95807
290	3635	| poly(rC)-binding protein 2 isoform b | 5094 | PCBP2 | 362 | Q15366 | sp	NP_114366	39.29	3	1	1	Carbamidomethylation	792.79	673.88	1310.3	0	0	0	792.79	673.88	1310.3	0	0	0	1.00:0.85:1.65:0:0:0	925.67	0	925.67	0	#DIV/0!	1.00:0	38222
579	3977	| DBIRD complex subunit ZNF326 isoform 1 | 284695 | ZNF326 | 582 | Q5BKZ1 | sp	NP_892021	39.29	26	11	11	Carbamidomethylation; Acetylation (Protein N-term)	8617.7	7010.7	10705	0	0	0	4084.2	3460.6	5974	0	0	0	1.00:0.85:1.46:0:0:0	8777.9	0	4506.3	0	#DIV/0!	1.00:0	65654
1278	7835	| probable proline--tRNA ligase mitochondrial precursor | 25973 | PARS2 | 475 | Q7L3T8 | sp	NP_689481	39.26	12	4	4	Carbamidomethylation	1054.7	917.68	1660	0	0	0	698.86	917.68	1376	0	0	0	1.00:1.31:1.97:0:0:0	1424.2	0	1104.3	0	#DIV/0!	1.00:0	53263
1672	18035	| coiled-coil domain-containing protein 97 isoform 2 | 90324 | CCDC97 | 278 | nan | nan	NP_001333029	39.23	12	2	2	Carbamidomethylation	398.09	390.05	784.9	0	0	0	398.09	390.05	784.9	0	0	0	1.00:0.98:1.97:0:0:0	723.68	0	723.68	0	#DIV/0!	1.00:0	32448
1672	18036	| coiled-coil domain-containing protein 97 isoform 1 | 90324 | CCDC97 | 343 | Q96F63 | sp	NP_443080	39.23	10	2	2	Carbamidomethylation	398.09	390.05	784.9	0	0	0	398.09	390.05	784.9	0	0	0	1.00:0.98:1.97:0:0:0	723.68	0	723.68	0	#DIV/0!	1.00:0	38947
1672	18037	| coiled-coil domain-containing protein 97 isoform X1 | 90324 | CCDC97 | 428 | nan | nan	XP_016882931	39.23	8	2	2	Carbamidomethylation	398.09	390.05	784.9	0	0	0	398.09	390.05	784.9	0	0	0	1.00:0.98:1.97:0:0:0	723.68	0	723.68	0	#DIV/0!	1.00:0	47681
1674	14605	| vacuolar fusion protein CCZ1 homolog | 51622 | CCZ1 | 482 | P86790 | sp	NP_056437	39.21	6	2	2	Acetylation (Protein N-term)	338.06	353.22	715.72	0	0	0	338.06	353.22	715.72	0	0	0	1.00:1.04:2.12:0:0:0	667.7	0	667.7	0	#DIV/0!	1.00:0	55866
1674	14606	| vacuolar fusion protein CCZ1 homolog B | 221960 | CCZ1B | 482 | P86790 | sp	NP_932765	39.21	6	2	2	Acetylation (Protein N-term)	338.06	353.22	715.72	0	0	0	338.06	353.22	715.72	0	0	0	1.00:1.04:2.12:0:0:0	667.7	0	667.7	0	#DIV/0!	1.00:0	55866
1490	10465	| nucleolar protein 10 isoform 3 | 79954 | NOL10 | 638 | Q9BSC4 | sp	NP_001248323	39.21	7	3	3		661.54	613.26	1169.6	0	0	0	661.54	613.26	1169.6	0	0	0	1.00:0.93:1.77:0:0:0	1062.1	0	1062.1	0	#DIV/0!	1.00:0	74509
1490	10466	| nucleolar protein 10 isoform 1 | 79954 | NOL10 | 688 | Q9BSC4 | sp	NP_079170	39.21	7	3	3		661.54	613.26	1169.6	0	0	0	661.54	613.26	1169.6	0	0	0	1.00:0.93:1.77:0:0:0	1062.1	0	1062.1	0	#DIV/0!	1.00:0	80302
860	5746	| BEN domain-containing protein 3 | 57673 | BEND3 | 828 | Q5T5X7 | sp	NP_001073919	39.2	10	6	6	Carbamidomethylation	2142.7	1003.8	2314.3	0	0	0	1269.7	725.87	1314.5	0	0	0	1.00:0.57:1.04:0:0:0	2189.8	0	1236.7	0	#DIV/0!	1.00:0	94475
860	5747	| BEN domain-containing protein 3 isoform X1 | 57673 | BEND3 | 828 | Q5T5X7 | sp	XP_005267137	39.2	10	6	6	Carbamidomethylation	2142.7	1003.8	2314.3	0	0	0	1269.7	725.87	1314.5	0	0	0	1.00:0.57:1.04:0:0:0	2189.8	0	1236.7	0	#DIV/0!	1.00:0	94475
860	5748	| BEN domain-containing protein 3 isoform X1 | 57673 | BEND3 | 828 | Q5T5X7 | sp	XP_011534307	39.2	10	6	6	Carbamidomethylation	2142.7	1003.8	2314.3	0	0	0	1269.7	725.87	1314.5	0	0	0	1.00:0.57:1.04:0:0:0	2189.8	0	1236.7	0	#DIV/0!	1.00:0	94475
860	5749	| BEN domain-containing protein 3 isoform X1 | 57673 | BEND3 | 828 | Q5T5X7 | sp	XP_005267136	39.2	10	6	6	Carbamidomethylation	2142.7	1003.8	2314.3	0	0	0	1269.7	725.87	1314.5	0	0	0	1.00:0.57:1.04:0:0:0	2189.8	0	1236.7	0	#DIV/0!	1.00:0	94475
163	2396	| poly(rC)-binding protein 1 | 5093 | PCBP1 | 356 | Q15365 | sp	NP_006187	39.19	59	12	12	Carbamidomethylation; Oxidation (M)	81496	66651	70066	1631.5	1967.6	2470.6	53467	42402	45233	1631.5	1967.6	2470.6	1.00:0.79:0.85:0.03:0.04:0.05	73557	2023.2	47034	2023.2	23.2473	1.00:0.04	37498
1693	11317	| insulin-like growth factor 2 mRNA-binding protein 3 isoform X3 | 10643 | IGF2BP3 | 422 | nan | nan	XP_011513393	39.13	7	2	2	Carbamidomethylation	766.58	334.67	324.71	0	0	0	766.58	334.67	324.71	0	0	0	1.00:0.44:0.42:0:0:0	723.89	0	723.89	0	#DIV/0!	1.00:0	46125
1693	11318	| insulin-like growth factor 2 mRNA-binding protein 3 isoform X3 | 10643 | IGF2BP3 | 422 | nan | nan	XP_006715702	39.13	7	2	2	Carbamidomethylation	766.58	334.67	324.71	0	0	0	766.58	334.67	324.71	0	0	0	1.00:0.44:0.42:0:0:0	723.89	0	723.89	0	#DIV/0!	1.00:0	46125
1693	11319	| insulin-like growth factor 2 mRNA-binding protein 3 isoform X2 | 10643 | IGF2BP3 | 471 | nan | nan	XP_011513392	39.13	6	2	2	Carbamidomethylation	766.58	334.67	324.71	0	0	0	766.58	334.67	324.71	0	0	0	1.00:0.44:0.42:0:0:0	723.89	0	723.89	0	#DIV/0!	1.00:0	51721
1693	11320	| insulin-like growth factor 2 mRNA-binding protein 3 isoform X4 | 10643 | IGF2BP3 | 486 | nan | nan	XP_011513395	39.13	6	2	2	Carbamidomethylation	766.58	334.67	324.71	0	0	0	766.58	334.67	324.71	0	0	0	1.00:0.44:0.42:0:0:0	723.89	0	723.89	0	#DIV/0!	1.00:0	53236
1693	11321	| insulin-like growth factor 2 mRNA-binding protein 3 isoform X4 | 10643 | IGF2BP3 | 486 | nan | nan	XP_011513394	39.13	6	2	2	Carbamidomethylation	766.58	334.67	324.71	0	0	0	766.58	334.67	324.71	0	0	0	1.00:0.44:0.42:0:0:0	723.89	0	723.89	0	#DIV/0!	1.00:0	53236
1693	11322	| insulin-like growth factor 2 mRNA-binding protein 3 | 10643 | IGF2BP3 | 579 | O00425 | sp	NP_006538	39.13	5	2	2	Carbamidomethylation	766.58	334.67	324.71	0	0	0	766.58	334.67	324.71	0	0	0	1.00:0.44:0.42:0:0:0	723.89	0	723.89	0	#DIV/0!	1.00:0	63705
1693	11323	| insulin-like growth factor 2 mRNA-binding protein 3 isoform X1 | 10643 | IGF2BP3 | 584 | nan | nan	XP_011513391	39.13	5	2	2	Carbamidomethylation	766.58	334.67	324.71	0	0	0	766.58	334.67	324.71	0	0	0	1.00:0.44:0.42:0:0:0	723.89	0	723.89	0	#DIV/0!	1.00:0	64250
28	101	| nucleolar protein 58 | 51602 | NOP58 | 529 | Q9Y2X3 | sp	NP_057018	39.12	53	24	24	Carbamidomethylation; Oxidation (M)	86176	72513	97894	3959.6	3693	4960	22297	17286	22993	1170.5	1375.6	1795.7	1.00:0.78:1.03:0.05:0.06:0.08	86837	4950.8	20859	1548	13.4748	1.00:0.07	59578
992	5809	| tRNA (guanine(26)-N(2))-dimethyltransferase isoform 3 | 55621 | TRMT1 | 623 | nan | nan	NP_001338690	39.11	11	4	4	Carbamidomethylation	1403.8	1377.3	1836.7	0	0	0	1114.2	1006	1836.7	0	0	0	1.00:0.90:1.65:0:0:0	2190.3	0	1859.8	0	#DIV/0!	1.00:0	68182
992	6093	| tRNA (guanine(26)-N(2))-dimethyltransferase isoform 2 | 55621 | TRMT1 | 630 | nan | nan	NP_001338689	39.11	11	4	4	Carbamidomethylation	1403.8	1377.3	1836.7	0	0	0	1114.2	1006	1836.7	0	0	0	1.00:0.90:1.65:0:0:0	2190.3	0	1859.8	0	#DIV/0!	1.00:0	69306
992	6094	| tRNA (guanine(26)-N(2))-dimethyltransferase isoform 2 | 55621 | TRMT1 | 630 | Q9NXH9 | sp	NP_001136026	39.11	11	4	4	Carbamidomethylation	1403.8	1377.3	1836.7	0	0	0	1114.2	1006	1836.7	0	0	0	1.00:0.90:1.65:0:0:0	2190.3	0	1859.8	0	#DIV/0!	1.00:0	69306
992	6095	| tRNA (guanine(26)-N(2))-dimethyltransferase isoform 1 | 55621 | TRMT1 | 659 | Q9NXH9 | sp	NP_001129507	39.11	10	4	4	Carbamidomethylation	1403.8	1377.3	1836.7	0	0	0	1114.2	1006	1836.7	0	0	0	1.00:0.90:1.65:0:0:0	2190.3	0	1859.8	0	#DIV/0!	1.00:0	72234
992	6096	| tRNA (guanine(26)-N(2))-dimethyltransferase isoform 1 | 55621 | TRMT1 | 659 | Q9NXH9 | sp	NP_060192	39.11	10	4	4	Carbamidomethylation	1403.8	1377.3	1836.7	0	0	0	1114.2	1006	1836.7	0	0	0	1.00:0.90:1.65:0:0:0	2190.3	0	1859.8	0	#DIV/0!	1.00:0	72234
1417	8824	| signal recognition particle subunit SRP68 isoform 2 | 6730 | SRP68 | 589 | Q9UHB9 | sp	NP_001247431	39.1	4	2	2		839.45	482.42	934.29	0	0	0	839.45	482.42	934.29	0	0	0	1.00:0.57:1.11:0:0:0	856.94	0	856.94	0	#DIV/0!	1.00:0	66108
1417	8825	| signal recognition particle subunit SRP68 isoform 1 | 6730 | SRP68 | 627 | Q9UHB9 | sp	NP_055045	39.1	4	2	2		839.45	482.42	934.29	0	0	0	839.45	482.42	934.29	0	0	0	1.00:0.57:1.11:0:0:0	856.94	0	856.94	0	#DIV/0!	1.00:0	70730
1121	7508	| ATP-dependent RNA helicase DDX50 isoform X1 | 79009 | DDX50 | 737 | Q9BQ39 | sp	XP_016872115	39.06	4	2	2	Carbamidomethylation	332.35	296.92	661.19	0	0	0	332.35	296.92	661.19	0	0	0	1.00:0.89:1.99:0:0:0	636.14	0	636.14	0	#DIV/0!	1.00:0	82565
1121	7509	| ATP-dependent RNA helicase DDX50 | 79009 | DDX50 | 737 | Q9BQ39 | sp	NP_076950	39.06	4	2	2	Carbamidomethylation	332.35	296.92	661.19	0	0	0	332.35	296.92	661.19	0	0	0	1.00:0.89:1.99:0:0:0	636.14	0	636.14	0	#DIV/0!	1.00:0	82565
1121	7752	| ATP-dependent RNA helicase DDX50 isoform X2 | 79009 | DDX50 | 672 | nan | nan	XP_016872116	39.06	4	2	2	Carbamidomethylation	332.35	296.92	661.19	0	0	0	332.35	296.92	661.19	0	0	0	1.00:0.89:1.99:0:0:0	636.14	0	636.14	0	#DIV/0!	1.00:0	75013
1121	7753	| ATP-dependent RNA helicase DDX50 isoform X2 | 79009 | DDX50 | 672 | nan | nan	XP_005270205	39.06	4	2	2	Carbamidomethylation	332.35	296.92	661.19	0	0	0	332.35	296.92	661.19	0	0	0	1.00:0.89:1.99:0:0:0	636.14	0	636.14	0	#DIV/0!	1.00:0	75013
1121	7754	| ATP-dependent RNA helicase DDX50 isoform X2 | 79009 | DDX50 | 672 | nan | nan	XP_016872117	39.06	4	2	2	Carbamidomethylation	332.35	296.92	661.19	0	0	0	332.35	296.92	661.19	0	0	0	1.00:0.89:1.99:0:0:0	636.14	0	636.14	0	#DIV/0!	1.00:0	75013
1121	7755	| ATP-dependent RNA helicase DDX50 isoform X2 | 79009 | DDX50 | 672 | nan | nan	XP_024303930	39.06	4	2	2	Carbamidomethylation	332.35	296.92	661.19	0	0	0	332.35	296.92	661.19	0	0	0	1.00:0.89:1.99:0:0:0	636.14	0	636.14	0	#DIV/0!	1.00:0	75013
1121	7756	| ATP-dependent RNA helicase DDX50 isoform X2 | 79009 | DDX50 | 672 | nan | nan	XP_011538446	39.06	4	2	2	Carbamidomethylation	332.35	296.92	661.19	0	0	0	332.35	296.92	661.19	0	0	0	1.00:0.89:1.99:0:0:0	636.14	0	636.14	0	#DIV/0!	1.00:0	75013
1854	16660	| elongation factor Ts mitochondrial isoform 2 precursor | 10102 | TSFM | 325 | P43897 | sp	NP_005717	39.03	9	2	2	Carbamidomethylation	1057.2	534.97	845.81	0	0	0	1057.2	534.97	845.81	0	0	0	1.00:0.51:0.80:0:0:0	914.52	0	914.52	0	#DIV/0!	1.00:0	35391
1135	12044	| CUGBP Elav-like family member 1 isoform X6 | 10658 | CELF1 | 486 | nan | nan	XP_024304102	39.03	10	3	3	Carbamidomethylation	2053.5	1114.7	1671.9	0	0	0	2053.5	1114.7	1671.9	0	0	0	1.00:0.54:0.81:0:0:0	1715.8	0	1715.8	0	#DIV/0!	1.00:0	52063
1135	12045	| CUGBP Elav-like family member 1 isoform X6 | 10658 | CELF1 | 486 | nan | nan	XP_024304101	39.03	10	3	3	Carbamidomethylation	2053.5	1114.7	1671.9	0	0	0	2053.5	1114.7	1671.9	0	0	0	1.00:0.54:0.81:0:0:0	1715.8	0	1715.8	0	#DIV/0!	1.00:0	52063
1135	12046	| CUGBP Elav-like family member 1 isoform X5 | 10658 | CELF1 | 487 | nan | nan	XP_011518158	39.03	10	3	3	Carbamidomethylation	2053.5	1114.7	1671.9	0	0	0	2053.5	1114.7	1671.9	0	0	0	1.00:0.54:0.81:0:0:0	1715.8	0	1715.8	0	#DIV/0!	1.00:0	52134
1135	12047	| CUGBP Elav-like family member 1 isoform X5 | 10658 | CELF1 | 487 | nan | nan	XP_011518156	39.03	10	3	3	Carbamidomethylation	2053.5	1114.7	1671.9	0	0	0	2053.5	1114.7	1671.9	0	0	0	1.00:0.54:0.81:0:0:0	1715.8	0	1715.8	0	#DIV/0!	1.00:0	52134
1135	12048	| CUGBP Elav-like family member 1 isoform X5 | 10658 | CELF1 | 487 | nan | nan	XP_016872607	39.03	10	3	3	Carbamidomethylation	2053.5	1114.7	1671.9	0	0	0	2053.5	1114.7	1671.9	0	0	0	1.00:0.54:0.81:0:0:0	1715.8	0	1715.8	0	#DIV/0!	1.00:0	52134
1135	12049	| CUGBP Elav-like family member 1 isoform X5 | 10658 | CELF1 | 487 | nan | nan	XP_011518157	39.03	10	3	3	Carbamidomethylation	2053.5	1114.7	1671.9	0	0	0	2053.5	1114.7	1671.9	0	0	0	1.00:0.54:0.81:0:0:0	1715.8	0	1715.8	0	#DIV/0!	1.00:0	52134
1135	12050	| CUGBP Elav-like family member 1 isoform X5 | 10658 | CELF1 | 487 | nan | nan	XP_011518159	39.03	10	3	3	Carbamidomethylation	2053.5	1114.7	1671.9	0	0	0	2053.5	1114.7	1671.9	0	0	0	1.00:0.54:0.81:0:0:0	1715.8	0	1715.8	0	#DIV/0!	1.00:0	52134
1135	12051	| CUGBP Elav-like family member 1 isoform X5 | 10658 | CELF1 | 487 | nan | nan	XP_016872612	39.03	10	3	3	Carbamidomethylation	2053.5	1114.7	1671.9	0	0	0	2053.5	1114.7	1671.9	0	0	0	1.00:0.54:0.81:0:0:0	1715.8	0	1715.8	0	#DIV/0!	1.00:0	52134
1135	12052	| CUGBP Elav-like family member 1 isoform X5 | 10658 | CELF1 | 487 | nan | nan	XP_016872610	39.03	10	3	3	Carbamidomethylation	2053.5	1114.7	1671.9	0	0	0	2053.5	1114.7	1671.9	0	0	0	1.00:0.54:0.81:0:0:0	1715.8	0	1715.8	0	#DIV/0!	1.00:0	52134
1135	12053	| CUGBP Elav-like family member 1 isoform X5 | 10658 | CELF1 | 487 | nan | nan	XP_016872609	39.03	10	3	3	Carbamidomethylation	2053.5	1114.7	1671.9	0	0	0	2053.5	1114.7	1671.9	0	0	0	1.00:0.54:0.81:0:0:0	1715.8	0	1715.8	0	#DIV/0!	1.00:0	52134
1135	12054	| CUGBP Elav-like family member 1 isoform X5 | 10658 | CELF1 | 487 | nan | nan	XP_011518160	39.03	10	3	3	Carbamidomethylation	2053.5	1114.7	1671.9	0	0	0	2053.5	1114.7	1671.9	0	0	0	1.00:0.54:0.81:0:0:0	1715.8	0	1715.8	0	#DIV/0!	1.00:0	52134
1135	12055	| CUGBP Elav-like family member 1 isoform X5 | 10658 | CELF1 | 487 | nan | nan	XP_016872611	39.03	10	3	3	Carbamidomethylation	2053.5	1114.7	1671.9	0	0	0	2053.5	1114.7	1671.9	0	0	0	1.00:0.54:0.81:0:0:0	1715.8	0	1715.8	0	#DIV/0!	1.00:0	52134
1135	12056	| CUGBP Elav-like family member 1 isoform X4 | 10658 | CELF1 | 509 | nan | nan	XP_016872603	39.03	9	3	3	Carbamidomethylation	2053.5	1114.7	1671.9	0	0	0	2053.5	1114.7	1671.9	0	0	0	1.00:0.54:0.81:0:0:0	1715.8	0	1715.8	0	#DIV/0!	1.00:0	54554
1135	12057	| CUGBP Elav-like family member 1 isoform X4 | 10658 | CELF1 | 509 | nan | nan	XP_016872600	39.03	9	3	3	Carbamidomethylation	2053.5	1114.7	1671.9	0	0	0	2053.5	1114.7	1671.9	0	0	0	1.00:0.54:0.81:0:0:0	1715.8	0	1715.8	0	#DIV/0!	1.00:0	54554
1135	12058	| CUGBP Elav-like family member 1 isoform X4 | 10658 | CELF1 | 509 | nan | nan	XP_016872602	39.03	9	3	3	Carbamidomethylation	2053.5	1114.7	1671.9	0	0	0	2053.5	1114.7	1671.9	0	0	0	1.00:0.54:0.81:0:0:0	1715.8	0	1715.8	0	#DIV/0!	1.00:0	54554
1135	12059	| CUGBP Elav-like family member 1 isoform X4 | 10658 | CELF1 | 509 | nan | nan	XP_016872601	39.03	9	3	3	Carbamidomethylation	2053.5	1114.7	1671.9	0	0	0	2053.5	1114.7	1671.9	0	0	0	1.00:0.54:0.81:0:0:0	1715.8	0	1715.8	0	#DIV/0!	1.00:0	54554
64	106	| lamin isoform C | 4000 | LMNA | 572 | P02545 | sp	NP_005563	39.02	5	1	1		730.54	1244.5	2501.2	0	0	0	730.54	1244.5	2501.2	0	0	0	1.00:1.70:3.42:0:0:0	1660.5	0	1660.5	0	#DIV/0!	1.00:0	65135
64	107	| lamin isoform C | 4000 | LMNA | 572 | P02545 | sp	NP_001269554	39.02	5	1	1		730.54	1244.5	2501.2	0	0	0	730.54	1244.5	2501.2	0	0	0	1.00:1.70:3.42:0:0:0	1660.5	0	1660.5	0	#DIV/0!	1.00:0	65135
1688	17177	| leucine-rich repeat and calponin homology domain-containing protein | 4034 | LRCH4 | 683 | O75427 | sp	NP_002310	39	5	2	2		508.81	334.02	721.65	0	0	0	508.81	334.02	721.65	0	0	0	1.00:0.66:1.42:0:0:0	669.38	0	669.38	0	#DIV/0!	1.00:0	73450
1688	17509	| leucine-rich repeat and calponin homology domain-containing protein | 4034 | LRCH4 | 652 | O75427 | sp	NP_001276863	39	5	2	2		508.81	334.02	721.65	0	0	0	508.81	334.02	721.65	0	0	0	1.00:0.66:1.42:0:0:0	669.38	0	669.38	0	#DIV/0!	1.00:0	70220
1166	8769	| acyl-coenzyme A thioesterase 8 | 10005 | ACOT8 | 319 | O14734 | sp	NP_005460	38.98	15	3	3		974.37	686.59	1336.9	0	0	0	974.37	686.59	1336.9	0	0	0	1.00:0.70:1.37:0:0:0	1133.5	0	1133.5	0	#DIV/0!	1.00:0	35914
517	2222	| regulation of nuclear pre-mRNA domain-containing protein 2 isoform | 23248 | RPRD2 | 1435 | Q5VT52 | sp	NP_001284603	38.95	7	7	7		1905.9	1446.7	3128.3	0	305.33	0	870.64	1202.3	1654.8	0	0	0	1.00:1.38:1.90:0:0:0	2856.8	305.33	1435	0	#DIV/0!	1.00:0	152875
517	2223	| regulation of nuclear pre-mRNA domain-containing protein 2 isoform | 23248 | RPRD2 | 1461 | Q5VT52 | sp	NP_056018	38.95	7	7	7		1905.9	1446.7	3128.3	0	305.33	0	870.64	1202.3	1654.8	0	0	0	1.00:1.38:1.90:0:0:0	2856.8	305.33	1435	0	#DIV/0!	1.00:0	156019
134	192	| dihydropyrimidinase-related protein 2 isoform 1 | 1808 | DPYSL2 | 677 | Q16555 | sp	NP_001184222	38.91	44	19	19	Carbamidomethylation	12080	13702	13818	0	0	0	3550.8	6080.7	4328.8	0	0	0	1.00:1.71:1.22:0:0:0	14442	0	5210.3	0	#DIV/0!	1.00:0	73503
1296	7346	| BRCA2 and CDKN1A-interacting protein isoform BCCIPbeta | 56647 | BCCIP | 314 | Q9P287 | sp	NP_510868	38.87	17	4	4		1584.2	1724.7	1303.8	0	0	0	1584.2	1724.7	966.47	0	0	0	1.00:1.09:0.61:0:0:0	1927.9	0	1590.6	0	#DIV/0!	1.00:0	35979
592	4770	| serine beta-lactamase-like protein LACTB mitochondrial isoform a | 114294 | LACTB | 547 | P83111 | sp	NP_116246	38.82	3	1	1		428.09	328.06	702.46	0	0	0	428.09	328.06	702.46	0	0	0	1.00:0.77:1.64:0:0:0	486.2	0	486.2	0	#DIV/0!	1.00:0	60694
1771	11961	| chromosome alignment-maintaining phosphoprotein 1 | 283489 | CHAMP1 | 812 | Q96JM3 | sp	NP_001157616	38.8	3	2	2		336.04	287.73	734.77	0	0	0	336.04	287.73	734.77	0	0	0	1.00:0.86:2.19:0:0:0	596.1	0	596.1	0	#DIV/0!	1.00:0	89099
1771	11962	| chromosome alignment-maintaining phosphoprotein 1 | 283489 | CHAMP1 | 812 | Q96JM3 | sp	NP_115812	38.8	3	2	2		336.04	287.73	734.77	0	0	0	336.04	287.73	734.77	0	0	0	1.00:0.86:2.19:0:0:0	596.1	0	596.1	0	#DIV/0!	1.00:0	89099
1771	11963	| chromosome alignment-maintaining phosphoprotein 1 | 283489 | CHAMP1 | 812 | Q96JM3 | sp	NP_001157617	38.8	3	2	2		336.04	287.73	734.77	0	0	0	336.04	287.73	734.77	0	0	0	1.00:0.86:2.19:0:0:0	596.1	0	596.1	0	#DIV/0!	1.00:0	89099
2213	28291	| transmembrane emp24 domain-containing protein 1 precursor | 11018 | TMED1 | 227 | Q13445 | sp	NP_006849	38.78	6	1	1	Carbamidomethylation	525.07	296.62	617.99	0	0	0	525.07	296.62	617.99	0	0	0	1.00:0.56:1.18:0:0:0	479.89	0	479.89	0	#DIV/0!	1.00:0	25206
1020	5784	| protein virilizer homolog isoform X1 | 25962 | VIRMA | 1477 | nan | nan	XP_016868796	38.76	3	3	3		915.37	413.09	1289.8	0	0	0	915.37	413.09	1289.8	0	0	0	1.00:0.45:1.41:0:0:0	1107.5	0	1107.5	0	#DIV/0!	1.00:0	164391
1020	5785	| protein virilizer homolog isoform X1 | 25962 | VIRMA | 1477 | nan | nan	XP_016868795	38.76	3	3	3		915.37	413.09	1289.8	0	0	0	915.37	413.09	1289.8	0	0	0	1.00:0.45:1.41:0:0:0	1107.5	0	1107.5	0	#DIV/0!	1.00:0	164391
1020	5786	| protein virilizer homolog isoform X1 | 25962 | VIRMA | 1477 | nan | nan	XP_016868797	38.76	3	3	3		915.37	413.09	1289.8	0	0	0	915.37	413.09	1289.8	0	0	0	1.00:0.45:1.41:0:0:0	1107.5	0	1107.5	0	#DIV/0!	1.00:0	164391
1020	5805	| protein virilizer homolog isoform 1 | 25962 | VIRMA | 1812 | Q69YN4 | sp	NP_056311	38.76	2	3	3		915.37	413.09	1289.8	0	0	0	915.37	413.09	1289.8	0	0	0	1.00:0.45:1.41:0:0:0	1107.5	0	1107.5	0	#DIV/0!	1.00:0	202023
22	413	| nuclear mitotic apparatus protein 1 isoform X4 | 4926 | NUMA1 | 2101 | A0A024R5M9 | tr	XP_011543368	38.75	0	1	1		565.57	240.47	358.92	0	0	0	565.57	240.47	358.92	0	0	0	1.00:0.43:0.63:0:0:0	388.32	0	388.32	0	#DIV/0!	1.00:0	236513
22	414	| nuclear mitotic apparatus protein 1 isoform 2 | 4926 | NUMA1 | 2101 | Q14980 | sp	NP_001273490	38.75	0	1	1		565.57	240.47	358.92	0	0	0	565.57	240.47	358.92	0	0	0	1.00:0.43:0.63:0:0:0	388.32	0	388.32	0	#DIV/0!	1.00:0	236513
22	415	| nuclear mitotic apparatus protein 1 isoform X4 | 4926 | NUMA1 | 2101 | A0A024R5M9 | tr	XP_016873319	38.75	0	1	1		565.57	240.47	358.92	0	0	0	565.57	240.47	358.92	0	0	0	1.00:0.43:0.63:0:0:0	388.32	0	388.32	0	#DIV/0!	1.00:0	236513
22	416	| nuclear mitotic apparatus protein 1 isoform X4 | 4926 | NUMA1 | 2101 | A0A024R5M9 | tr	XP_016873320	38.75	0	1	1		565.57	240.47	358.92	0	0	0	565.57	240.47	358.92	0	0	0	1.00:0.43:0.63:0:0:0	388.32	0	388.32	0	#DIV/0!	1.00:0	236513
22	424	| nuclear mitotic apparatus protein 1 isoform X2 | 4926 | NUMA1 | 2119 | nan | nan	XP_011543367	38.75	0	1	1		565.57	240.47	358.92	0	0	0	565.57	240.47	358.92	0	0	0	1.00:0.43:0.63:0:0:0	388.32	0	388.32	0	#DIV/0!	1.00:0	238526
1136	6757	| N-alpha-acetyltransferase 25 NatB auxiliary subunit isoform X1 | 80018 | NAA25 | 944 | nan | nan	XP_006719669	38.75	5	3	3	Carbamidomethylation	832.05	363.06	1087.2	0	0	0	832.05	363.06	1087.2	0	0	0	1.00:0.44:1.31:0:0:0	1098.9	0	1098.9	0	#DIV/0!	1.00:0	108980
1136	6758	| N-alpha-acetyltransferase 25 NatB auxiliary subunit | 80018 | NAA25 | 972 | Q14CX7 | sp	NP_079229	38.75	5	3	3	Carbamidomethylation	832.05	363.06	1087.2	0	0	0	832.05	363.06	1087.2	0	0	0	1.00:0.44:1.31:0:0:0	1098.9	0	1098.9	0	#DIV/0!	1.00:0	112292
1136	6945	| N-alpha-acetyltransferase 25 NatB auxiliary subunit isoform X2 | 80018 | NAA25 | 836 | nan | nan	XP_005253995	38.75	6	3	3	Carbamidomethylation	832.05	363.06	1087.2	0	0	0	832.05	363.06	1087.2	0	0	0	1.00:0.44:1.31:0:0:0	1098.9	0	1098.9	0	#DIV/0!	1.00:0	96702
2018	17528	| TBC1 domain family member 5 isoform X3 | 9779 | TBC1D5 | 659 | nan | nan	XP_024309608	38.73	4	2	2		438.65	536.49	243.87	0	0	0	438.65	536.49	243.87	0	0	0	1.00:1.22:0.56:0:0:0	581.19	0	581.19	0	#DIV/0!	1.00:0	73158
2018	17529	| TBC1 domain family member 5 isoform e | 9779 | TBC1D5 | 659 | nan | nan	NP_001336018	38.73	4	2	2		438.65	536.49	243.87	0	0	0	438.65	536.49	243.87	0	0	0	1.00:1.22:0.56:0:0:0	581.19	0	581.19	0	#DIV/0!	1.00:0	73158
2018	17530	| TBC1 domain family member 5 isoform e | 9779 | TBC1D5 | 659 | nan | nan	NP_001336019	38.73	4	2	2		438.65	536.49	243.87	0	0	0	438.65	536.49	243.87	0	0	0	1.00:1.22:0.56:0:0:0	581.19	0	581.19	0	#DIV/0!	1.00:0	73158
2018	17531	| TBC1 domain family member 5 isoform e | 9779 | TBC1D5 | 659 | nan | nan	NP_001336017	38.73	4	2	2		438.65	536.49	243.87	0	0	0	438.65	536.49	243.87	0	0	0	1.00:1.22:0.56:0:0:0	581.19	0	581.19	0	#DIV/0!	1.00:0	73158
2018	17532	| TBC1 domain family member 5 isoform e | 9779 | TBC1D5 | 659 | nan | nan	NP_001336016	38.73	4	2	2		438.65	536.49	243.87	0	0	0	438.65	536.49	243.87	0	0	0	1.00:1.22:0.56:0:0:0	581.19	0	581.19	0	#DIV/0!	1.00:0	73158
2018	17533	| TBC1 domain family member 5 isoform e | 9779 | TBC1D5 | 659 | nan | nan	NP_001336020	38.73	4	2	2		438.65	536.49	243.87	0	0	0	438.65	536.49	243.87	0	0	0	1.00:1.22:0.56:0:0:0	581.19	0	581.19	0	#DIV/0!	1.00:0	73158
2018	17534	| TBC1 domain family member 5 isoform d | 9779 | TBC1D5 | 681 | nan | nan	NP_001336015	38.73	4	2	2		438.65	536.49	243.87	0	0	0	438.65	536.49	243.87	0	0	0	1.00:1.22:0.56:0:0:0	581.19	0	581.19	0	#DIV/0!	1.00:0	75369
2018	17535	| TBC1 domain family member 5 isoform d | 9779 | TBC1D5 | 681 | nan | nan	NP_001336012	38.73	4	2	2		438.65	536.49	243.87	0	0	0	438.65	536.49	243.87	0	0	0	1.00:1.22:0.56:0:0:0	581.19	0	581.19	0	#DIV/0!	1.00:0	75369
2018	17536	| TBC1 domain family member 5 isoform d | 9779 | TBC1D5 | 681 | nan | nan	NP_001336011	38.73	4	2	2		438.65	536.49	243.87	0	0	0	438.65	536.49	243.87	0	0	0	1.00:1.22:0.56:0:0:0	581.19	0	581.19	0	#DIV/0!	1.00:0	75369
2018	17537	| TBC1 domain family member 5 isoform d | 9779 | TBC1D5 | 681 | nan | nan	NP_001336014	38.73	4	2	2		438.65	536.49	243.87	0	0	0	438.65	536.49	243.87	0	0	0	1.00:1.22:0.56:0:0:0	581.19	0	581.19	0	#DIV/0!	1.00:0	75369
2018	17538	| TBC1 domain family member 5 isoform d | 9779 | TBC1D5 | 681 | nan | nan	NP_001336013	38.73	4	2	2		438.65	536.49	243.87	0	0	0	438.65	536.49	243.87	0	0	0	1.00:1.22:0.56:0:0:0	581.19	0	581.19	0	#DIV/0!	1.00:0	75369
2018	21180	| TBC1 domain family member 5 isoform b | 9779 | TBC1D5 | 795 | nan | nan	NP_001336006	38.73	3	2	2		438.65	536.49	243.87	0	0	0	438.65	536.49	243.87	0	0	0	1.00:1.22:0.56:0:0:0	581.19	0	581.19	0	#DIV/0!	1.00:0	89004
2018	21181	| TBC1 domain family member 5 isoform b | 9779 | TBC1D5 | 795 | nan | nan	NP_001336005	38.73	3	2	2		438.65	536.49	243.87	0	0	0	438.65	536.49	243.87	0	0	0	1.00:1.22:0.56:0:0:0	581.19	0	581.19	0	#DIV/0!	1.00:0	89004
2018	21182	| TBC1 domain family member 5 isoform b | 9779 | TBC1D5 | 795 | nan | nan	NP_001336009	38.73	3	2	2		438.65	536.49	243.87	0	0	0	438.65	536.49	243.87	0	0	0	1.00:1.22:0.56:0:0:0	581.19	0	581.19	0	#DIV/0!	1.00:0	89004
2018	21183	| TBC1 domain family member 5 isoform b | 9779 | TBC1D5 | 795 | nan | nan	NP_001336007	38.73	3	2	2		438.65	536.49	243.87	0	0	0	438.65	536.49	243.87	0	0	0	1.00:1.22:0.56:0:0:0	581.19	0	581.19	0	#DIV/0!	1.00:0	89004
2018	21184	| TBC1 domain family member 5 isoform b | 9779 | TBC1D5 | 795 | nan | nan	NP_001336008	38.73	3	2	2		438.65	536.49	243.87	0	0	0	438.65	536.49	243.87	0	0	0	1.00:1.22:0.56:0:0:0	581.19	0	581.19	0	#DIV/0!	1.00:0	89004
2018	21185	| TBC1 domain family member 5 isoform b | 9779 | TBC1D5 | 795 | Q92609 | sp	NP_055559	38.73	3	2	2		438.65	536.49	243.87	0	0	0	438.65	536.49	243.87	0	0	0	1.00:1.22:0.56:0:0:0	581.19	0	581.19	0	#DIV/0!	1.00:0	89004
2018	21186	| TBC1 domain family member 5 isoform X2 | 9779 | TBC1D5 | 795 | Q92609 | sp	XP_016863046	38.73	3	2	2		438.65	536.49	243.87	0	0	0	438.65	536.49	243.87	0	0	0	1.00:1.22:0.56:0:0:0	581.19	0	581.19	0	#DIV/0!	1.00:0	89004
2018	21187	| TBC1 domain family member 5 isoform c | 9779 | TBC1D5 | 802 | nan | nan	NP_001336010	38.73	3	2	2		438.65	536.49	243.87	0	0	0	438.65	536.49	243.87	0	0	0	1.00:1.22:0.56:0:0:0	581.19	0	581.19	0	#DIV/0!	1.00:0	89275
2018	21188	| TBC1 domain family member 5 isoform a | 9779 | TBC1D5 | 817 | nan | nan	NP_001336002	38.73	3	2	2		438.65	536.49	243.87	0	0	0	438.65	536.49	243.87	0	0	0	1.00:1.22:0.56:0:0:0	581.19	0	581.19	0	#DIV/0!	1.00:0	91216
2018	21189	| TBC1 domain family member 5 isoform a | 9779 | TBC1D5 | 817 | nan | nan	NP_001336003	38.73	3	2	2		438.65	536.49	243.87	0	0	0	438.65	536.49	243.87	0	0	0	1.00:1.22:0.56:0:0:0	581.19	0	581.19	0	#DIV/0!	1.00:0	91216
2018	21190	| TBC1 domain family member 5 isoform X1 | 9779 | TBC1D5 | 817 | Q92609 | sp	XP_011532585	38.73	3	2	2		438.65	536.49	243.87	0	0	0	438.65	536.49	243.87	0	0	0	1.00:1.22:0.56:0:0:0	581.19	0	581.19	0	#DIV/0!	1.00:0	91216
2018	21191	| TBC1 domain family member 5 isoform X1 | 9779 | TBC1D5 | 817 | Q92609 | sp	XP_016863043	38.73	3	2	2		438.65	536.49	243.87	0	0	0	438.65	536.49	243.87	0	0	0	1.00:1.22:0.56:0:0:0	581.19	0	581.19	0	#DIV/0!	1.00:0	91216
2018	21192	| TBC1 domain family member 5 isoform X1 | 9779 | TBC1D5 | 817 | Q92609 | sp	XP_016863045	38.73	3	2	2		438.65	536.49	243.87	0	0	0	438.65	536.49	243.87	0	0	0	1.00:1.22:0.56:0:0:0	581.19	0	581.19	0	#DIV/0!	1.00:0	91216
2018	21193	| TBC1 domain family member 5 isoform X1 | 9779 | TBC1D5 | 817 | Q92609 | sp	XP_016863041	38.73	3	2	2		438.65	536.49	243.87	0	0	0	438.65	536.49	243.87	0	0	0	1.00:1.22:0.56:0:0:0	581.19	0	581.19	0	#DIV/0!	1.00:0	91216
2018	21194	| TBC1 domain family member 5 isoform X1 | 9779 | TBC1D5 | 817 | nan | nan	XP_024309607	38.73	3	2	2		438.65	536.49	243.87	0	0	0	438.65	536.49	243.87	0	0	0	1.00:1.22:0.56:0:0:0	581.19	0	581.19	0	#DIV/0!	1.00:0	91216
2018	21195	| TBC1 domain family member 5 isoform X1 | 9779 | TBC1D5 | 817 | Q92609 | sp	XP_016863044	38.73	3	2	2		438.65	536.49	243.87	0	0	0	438.65	536.49	243.87	0	0	0	1.00:1.22:0.56:0:0:0	581.19	0	581.19	0	#DIV/0!	1.00:0	91216
2018	21196	| TBC1 domain family member 5 isoform a | 9779 | TBC1D5 | 817 | nan | nan	NP_001336004	38.73	3	2	2		438.65	536.49	243.87	0	0	0	438.65	536.49	243.87	0	0	0	1.00:1.22:0.56:0:0:0	581.19	0	581.19	0	#DIV/0!	1.00:0	91216
2018	21197	| TBC1 domain family member 5 isoform X1 | 9779 | TBC1D5 | 817 | Q92609 | sp	XP_016863042	38.73	3	2	2		438.65	536.49	243.87	0	0	0	438.65	536.49	243.87	0	0	0	1.00:1.22:0.56:0:0:0	581.19	0	581.19	0	#DIV/0!	1.00:0	91216
2018	21198	| TBC1 domain family member 5 isoform X1 | 9779 | TBC1D5 | 817 | Q92609 | sp	XP_011532586	38.73	3	2	2		438.65	536.49	243.87	0	0	0	438.65	536.49	243.87	0	0	0	1.00:1.22:0.56:0:0:0	581.19	0	581.19	0	#DIV/0!	1.00:0	91216
2153	15056	| myomegalin isoform X35 | 9659 | PDE4DIP | 2243 | nan | nan	XP_016858392	38.71	1	2	2	Carbamidomethylation	696.81	249.98	470.59	0	0	0	696.81	249.98	470.59	0	0	0	1.00:0.36:0.68:0:0:0	601.31	0	601.31	0	#DIV/0!	1.00:0	254625
2153	15060	| myomegalin isoform X27 | 9659 | PDE4DIP | 2367 | nan | nan	XP_016858380	38.71	1	2	2	Carbamidomethylation	696.81	249.98	470.59	0	0	0	696.81	249.98	470.59	0	0	0	1.00:0.36:0.68:0:0:0	601.31	0	601.31	0	#DIV/0!	1.00:0	266299
2153	15061	| myomegalin isoform X27 | 9659 | PDE4DIP | 2367 | nan | nan	XP_016858384	38.71	1	2	2	Carbamidomethylation	696.81	249.98	470.59	0	0	0	696.81	249.98	470.59	0	0	0	1.00:0.36:0.68:0:0:0	601.31	0	601.31	0	#DIV/0!	1.00:0	266299
2153	15062	| myomegalin isoform X27 | 9659 | PDE4DIP | 2367 | nan | nan	XP_016858383	38.71	1	2	2	Carbamidomethylation	696.81	249.98	470.59	0	0	0	696.81	249.98	470.59	0	0	0	1.00:0.36:0.68:0:0:0	601.31	0	601.31	0	#DIV/0!	1.00:0	266299
2153	15063	| myomegalin isoform X27 | 9659 | PDE4DIP | 2367 | nan | nan	XP_016858382	38.71	1	2	2	Carbamidomethylation	696.81	249.98	470.59	0	0	0	696.81	249.98	470.59	0	0	0	1.00:0.36:0.68:0:0:0	601.31	0	601.31	0	#DIV/0!	1.00:0	266299
2153	15064	| myomegalin isoform X27 | 9659 | PDE4DIP | 2367 | nan | nan	XP_016858381	38.71	1	2	2	Carbamidomethylation	696.81	249.98	470.59	0	0	0	696.81	249.98	470.59	0	0	0	1.00:0.36:0.68:0:0:0	601.31	0	601.31	0	#DIV/0!	1.00:0	266299
2153	15066	| myomegalin isoform X25 | 9659 | PDE4DIP | 2397 | nan | nan	XP_016858376	38.71	1	2	2	Carbamidomethylation	696.81	249.98	470.59	0	0	0	696.81	249.98	470.59	0	0	0	1.00:0.36:0.68:0:0:0	601.31	0	601.31	0	#DIV/0!	1.00:0	270314
2153	15067	| myomegalin isoform X25 | 9659 | PDE4DIP | 2397 | nan | nan	XP_016858378	38.71	1	2	2	Carbamidomethylation	696.81	249.98	470.59	0	0	0	696.81	249.98	470.59	0	0	0	1.00:0.36:0.68:0:0:0	601.31	0	601.31	0	#DIV/0!	1.00:0	270314
2153	15068	| myomegalin isoform X25 | 9659 | PDE4DIP | 2397 | nan | nan	XP_016858377	38.71	1	2	2	Carbamidomethylation	696.81	249.98	470.59	0	0	0	696.81	249.98	470.59	0	0	0	1.00:0.36:0.68:0:0:0	601.31	0	601.31	0	#DIV/0!	1.00:0	270314
2153	15069	| myomegalin isoform X21 | 9659 | PDE4DIP | 2428 | nan | nan	XP_006711715	38.71	1	2	2	Carbamidomethylation	696.81	249.98	470.59	0	0	0	696.81	249.98	470.59	0	0	0	1.00:0.36:0.68:0:0:0	601.31	0	601.31	0	#DIV/0!	1.00:0	274169
2153	15070	| myomegalin isoform X19 | 9659 | PDE4DIP | 2429 | nan | nan	XP_006711714	38.71	1	2	2	Carbamidomethylation	696.81	249.98	470.59	0	0	0	696.81	249.98	470.59	0	0	0	1.00:0.36:0.68:0:0:0	601.31	0	601.31	0	#DIV/0!	1.00:0	274240
2153	15071	| myomegalin isoform X18 | 9659 | PDE4DIP | 2432 | nan | nan	XP_006711713	38.71	1	2	2	Carbamidomethylation	696.81	249.98	470.59	0	0	0	696.81	249.98	470.59	0	0	0	1.00:0.36:0.68:0:0:0	601.31	0	601.31	0	#DIV/0!	1.00:0	274716
2153	15105	| myomegalin isoform 8 | 9659 | PDE4DIP | 2240 | Q5VU43 | sp	NP_001185761	38.71	1	2	2	Carbamidomethylation	696.81	249.98	470.59	0	0	0	696.81	249.98	470.59	0	0	0	1.00:0.36:0.68:0:0:0	601.31	0	601.31	0	#DIV/0!	1.00:0	254066
2153	15107	| myomegalin isoform 13 | 9659 | PDE4DIP | 2255 | nan | nan	NP_001337452	38.71	1	2	2	Carbamidomethylation	696.81	249.98	470.59	0	0	0	696.81	249.98	470.59	0	0	0	1.00:0.36:0.68:0:0:0	601.31	0	601.31	0	#DIV/0!	1.00:0	256093
2153	15108	| myomegalin isoform X34 | 9659 | PDE4DIP | 2257 | nan | nan	XP_016858390	38.71	1	2	2	Carbamidomethylation	696.81	249.98	470.59	0	0	0	696.81	249.98	470.59	0	0	0	1.00:0.36:0.68:0:0:0	601.31	0	601.31	0	#DIV/0!	1.00:0	254010
2153	15109	| myomegalin isoform X33 | 9659 | PDE4DIP | 2273 | nan | nan	XP_016858389	38.71	1	2	2	Carbamidomethylation	696.81	249.98	470.59	0	0	0	696.81	249.98	470.59	0	0	0	1.00:0.36:0.68:0:0:0	601.31	0	601.31	0	#DIV/0!	1.00:0	256107
2153	15110	| myomegalin isoform X32 | 9659 | PDE4DIP | 2302 | nan | nan	XP_016858388	38.71	1	2	2	Carbamidomethylation	696.81	249.98	470.59	0	0	0	696.81	249.98	470.59	0	0	0	1.00:0.36:0.68:0:0:0	601.31	0	601.31	0	#DIV/0!	1.00:0	260664
2153	15111	| myomegalin isoform X31 | 9659 | PDE4DIP | 2311 | nan | nan	XP_011508478	38.71	1	2	2	Carbamidomethylation	696.81	249.98	470.59	0	0	0	696.81	249.98	470.59	0	0	0	1.00:0.36:0.68:0:0:0	601.31	0	601.31	0	#DIV/0!	1.00:0	261794
2153	15112	| myomegalin isoform X30 | 9659 | PDE4DIP | 2326 | nan | nan	XP_024306836	38.71	1	2	2	Carbamidomethylation	696.81	249.98	470.59	0	0	0	696.81	249.98	470.59	0	0	0	1.00:0.36:0.68:0:0:0	601.31	0	601.31	0	#DIV/0!	1.00:0	263820
2153	15113	| myomegalin isoform 12 | 9659 | PDE4DIP | 2345 | nan | nan	NP_001337451	38.71	1	2	2	Carbamidomethylation	696.81	249.98	470.59	0	0	0	696.81	249.98	470.59	0	0	0	1.00:0.36:0.68:0:0:0	601.31	0	601.31	0	#DIV/0!	1.00:0	266324
2153	15114	| myomegalin isoform X36 | 9659 | PDE4DIP | 2345 | nan | nan	XP_011508481	38.71	1	2	2	Carbamidomethylation	696.81	249.98	470.59	0	0	0	696.81	249.98	470.59	0	0	0	1.00:0.36:0.68:0:0:0	601.31	0	601.31	0	#DIV/0!	1.00:0	265029
2153	15116	| myomegalin isoform X29 | 9659 | PDE4DIP | 2366 | nan | nan	XP_016858386	38.71	1	2	2	Carbamidomethylation	696.81	249.98	470.59	0	0	0	696.81	249.98	470.59	0	0	0	1.00:0.36:0.68:0:0:0	601.31	0	601.31	0	#DIV/0!	1.00:0	266084
2153	15117	| myomegalin isoform X28 | 9659 | PDE4DIP | 2367 | nan | nan	XP_016858385	38.71	1	2	2	Carbamidomethylation	696.81	249.98	470.59	0	0	0	696.81	249.98	470.59	0	0	0	1.00:0.36:0.68:0:0:0	601.31	0	601.31	0	#DIV/0!	1.00:0	266155
2153	15118	| myomegalin isoform X26 | 9659 | PDE4DIP | 2383 | nan | nan	XP_016858379	38.71	1	2	2	Carbamidomethylation	696.81	249.98	470.59	0	0	0	696.81	249.98	470.59	0	0	0	1.00:0.36:0.68:0:0:0	601.31	0	601.31	0	#DIV/0!	1.00:0	268252
2153	15119	| myomegalin isoform X24 | 9659 | PDE4DIP | 2398 | nan | nan	XP_016858375	38.71	1	2	2	Carbamidomethylation	696.81	249.98	470.59	0	0	0	696.81	249.98	470.59	0	0	0	1.00:0.36:0.68:0:0:0	601.31	0	601.31	0	#DIV/0!	1.00:0	269117
2153	15120	| myomegalin isoform X23 | 9659 | PDE4DIP | 2399 | nan | nan	XP_016858374	38.71	1	2	2	Carbamidomethylation	696.81	249.98	470.59	0	0	0	696.81	249.98	470.59	0	0	0	1.00:0.36:0.68:0:0:0	601.31	0	601.31	0	#DIV/0!	1.00:0	269188
2153	15121	| myomegalin isoform X22 | 9659 | PDE4DIP | 2416 | nan | nan	XP_024306835	38.71	1	2	2	Carbamidomethylation	696.81	249.98	470.59	0	0	0	696.81	249.98	470.59	0	0	0	1.00:0.36:0.68:0:0:0	601.31	0	601.31	0	#DIV/0!	1.00:0	274052
2153	15122	| myomegalin isoform X20 | 9659 | PDE4DIP | 2429 | nan | nan	XP_016858373	38.71	1	2	2	Carbamidomethylation	696.81	249.98	470.59	0	0	0	696.81	249.98	470.59	0	0	0	1.00:0.36:0.68:0:0:0	601.31	0	601.31	0	#DIV/0!	1.00:0	272752
2153	15123	| myomegalin isoform X17 | 9659 | PDE4DIP | 2445 | nan | nan	XP_016858372	38.71	1	2	2	Carbamidomethylation	696.81	249.98	470.59	0	0	0	696.81	249.98	470.59	0	0	0	1.00:0.36:0.68:0:0:0	601.31	0	601.31	0	#DIV/0!	1.00:0	274850
2153	15124	| myomegalin isoform X16 | 9659 | PDE4DIP | 2446 | nan | nan	XP_016858371	38.71	1	2	2	Carbamidomethylation	696.81	249.98	470.59	0	0	0	696.81	249.98	470.59	0	0	0	1.00:0.36:0.68:0:0:0	601.31	0	601.31	0	#DIV/0!	1.00:0	274664
2153	15125	| myomegalin isoform X15 | 9659 | PDE4DIP | 2447 | nan | nan	XP_016858370	38.71	1	2	2	Carbamidomethylation	696.81	249.98	470.59	0	0	0	696.81	249.98	470.59	0	0	0	1.00:0.36:0.68:0:0:0	601.31	0	601.31	0	#DIV/0!	1.00:0	274736
374	1339	| FAST kinase domain-containing protein 5 mitochondrial | 60493 | FASTKD5 | 764 | Q7L8L6 | sp	NP_068598	38.69	22	11	11	Carbamidomethylation	4155.8	3078.4	7483	0	0	400.05	2099.8	2048.3	3408.4	0	0	0	1.00:0.98:1.62:0:0:0	6936.9	400.05	2820.9	0	#DIV/0!	1.00:0	86574
1447	14018	| exosome complex component RRP4 isoform 1 | 23404 | EXOSC2 | 293 | Q13868 | sp	NP_055100	38.66	15	3	3		627.71	409.22	1277.9	0	0	0	627.71	409.22	1277.9	0	0	0	1.00:0.65:2.04:0:0:0	1289.2	0	1289.2	0	#DIV/0!	1.00:0	32789
1944	12007	| inner centromere protein isoform 2 | 3619 | INCENP | 914 | Q9NQS7 | sp	NP_064623	38.66	3	2	2	Carbamidomethylation	273.5	299.17	588.05	0	0	0	273.5	299.17	588.05	0	0	0	1.00:1.09:2.15:0:0:0	543.58	0	543.58	0	#DIV/0!	1.00:0	104992
1944	12008	| inner centromere protein isoform 1 | 3619 | INCENP | 918 | Q9NQS7 | sp	NP_001035784	38.66	3	2	2	Carbamidomethylation	273.5	299.17	588.05	0	0	0	273.5	299.17	588.05	0	0	0	1.00:1.09:2.15:0:0:0	543.58	0	543.58	0	#DIV/0!	1.00:0	105429
1944	12009	| inner centromere protein isoform X5 | 3619 | INCENP | 922 | nan | nan	XP_006718596	38.66	3	2	2	Carbamidomethylation	273.5	299.17	588.05	0	0	0	273.5	299.17	588.05	0	0	0	1.00:1.09:2.15:0:0:0	543.58	0	543.58	0	#DIV/0!	1.00:0	105883
1944	12010	| inner centromere protein isoform X4 | 3619 | INCENP | 925 | nan | nan	XP_011543300	38.66	3	2	2	Carbamidomethylation	273.5	299.17	588.05	0	0	0	273.5	299.17	588.05	0	0	0	1.00:1.09:2.15:0:0:0	543.58	0	543.58	0	#DIV/0!	1.00:0	106183
1944	12011	| inner centromere protein isoform X3 | 3619 | INCENP | 929 | nan | nan	XP_011543299	38.66	3	2	2	Carbamidomethylation	273.5	299.17	588.05	0	0	0	273.5	299.17	588.05	0	0	0	1.00:1.09:2.15:0:0:0	543.58	0	543.58	0	#DIV/0!	1.00:0	106637
1944	12012	| inner centromere protein isoform X2 | 3619 | INCENP | 929 | nan | nan	XP_011543298	38.66	3	2	2	Carbamidomethylation	273.5	299.17	588.05	0	0	0	273.5	299.17	588.05	0	0	0	1.00:1.09:2.15:0:0:0	543.58	0	543.58	0	#DIV/0!	1.00:0	106619
1944	12013	| inner centromere protein isoform X1 | 3619 | INCENP | 933 | nan | nan	XP_011543297	38.66	3	2	2	Carbamidomethylation	273.5	299.17	588.05	0	0	0	273.5	299.17	588.05	0	0	0	1.00:1.09:2.15:0:0:0	543.58	0	543.58	0	#DIV/0!	1.00:0	107074
1666	9792	| alpha-aminoadipic semialdehyde dehydrogenase isoform 2 | 501 | ALDH7A1 | 511 | P49419 | sp	NP_001188306	38.65	9	3	3	Carbamidomethylation	316.65	465.62	926.8	0	0	0	316.65	465.62	926.8	0	0	0	1.00:1.47:2.93:0:0:0	832.66	0	832.66	0	#DIV/0!	1.00:0	55366
1666	10198	| alpha-aminoadipic semialdehyde dehydrogenase isoform 1 precursor | 501 | ALDH7A1 | 539 | P49419 | sp	NP_001173	38.65	8	3	3	Carbamidomethylation	316.65	465.62	926.8	0	0	0	316.65	465.62	926.8	0	0	0	1.00:1.47:2.93:0:0:0	832.66	0	832.66	0	#DIV/0!	1.00:0	58487
1666	11559	| alpha-aminoadipic semialdehyde dehydrogenase isoform 3 | 501 | ALDH7A1 | 475 | P49419 | sp	NP_001189333	38.65	9	3	3	Carbamidomethylation	316.65	465.62	926.8	0	0	0	316.65	465.62	926.8	0	0	0	1.00:1.47:2.93:0:0:0	832.66	0	832.66	0	#DIV/0!	1.00:0	51411
1618	10965	| multiple myeloma tumor-associated protein 2 | 79169 | C1orf35 | 263 | Q9BU76 | sp	NP_077295	38.64	19	4	4		2571.1	1640	2533.3	0	0	334.07	2216.2	1314.3	2172.2	0	0	0	1.00:0.59:0.98:0:0:0	2562.5	334.07	2215.2	0	#DIV/0!	1.00:0	29412
1320	8398	| kinesin-like protein KIF15 isoform X4 | 56992 | KIF15 | 1314 | nan | nan	XP_016862375	38.63	3	3	3		713.42	900.52	310.62	0	0	0	713.42	900.52	310.62	0	0	0	1.00:1.26:0.44:0:0:0	815.23	0	815.23	0	#DIV/0!	1.00:0	152552
1320	8488	| kinesin-like protein KIF15 isoform X2 | 56992 | KIF15 | 1372 | nan | nan	XP_016862374	38.63	3	3	3		713.42	900.52	310.62	0	0	0	713.42	900.52	310.62	0	0	0	1.00:1.26:0.44:0:0:0	815.23	0	815.23	0	#DIV/0!	1.00:0	159208
1320	8503	| kinesin-like protein KIF15 isoform X3 | 56992 | KIF15 | 1322 | nan | nan	XP_011532266	38.63	3	3	3		713.42	900.52	310.62	0	0	0	713.42	900.52	310.62	0	0	0	1.00:1.26:0.44:0:0:0	815.23	0	815.23	0	#DIV/0!	1.00:0	152803
1320	8504	| kinesin-like protein KIF15 | 56992 | KIF15 | 1388 | Q9NS87 | sp	NP_064627	38.63	3	3	3		713.42	900.52	310.62	0	0	0	713.42	900.52	310.62	0	0	0	1.00:1.26:0.44:0:0:0	815.23	0	815.23	0	#DIV/0!	1.00:0	160159
1320	8505	| kinesin-like protein KIF15 isoform X1 | 56992 | KIF15 | 1411 | nan | nan	XP_016862373	38.63	3	3	3		713.42	900.52	310.62	0	0	0	713.42	900.52	310.62	0	0	0	1.00:1.26:0.44:0:0:0	815.23	0	815.23	0	#DIV/0!	1.00:0	162929
1320	8547	| kinesin-like protein KIF15 isoform X7 | 56992 | KIF15 | 1218 | nan | nan	XP_016862378	38.63	3	3	3		713.42	900.52	310.62	0	0	0	713.42	900.52	310.62	0	0	0	1.00:1.26:0.44:0:0:0	815.23	0	815.23	0	#DIV/0!	1.00:0	139683
1320	8548	| kinesin-like protein KIF15 isoform X5 | 56992 | KIF15 | 1308 | nan | nan	XP_016862376	38.63	3	3	3		713.42	900.52	310.62	0	0	0	713.42	900.52	310.62	0	0	0	1.00:1.26:0.44:0:0:0	815.23	0	815.23	0	#DIV/0!	1.00:0	150783
1320	9114	| kinesin-like protein KIF15 isoform X6 | 56992 | KIF15 | 1297 | nan | nan	XP_016862377	38.63	3	3	3		713.42	900.52	310.62	0	0	0	713.42	900.52	310.62	0	0	0	1.00:1.26:0.44:0:0:0	815.23	0	815.23	0	#DIV/0!	1.00:0	150884
1403	12822	| splicing regulatory glutamine/lysine-rich protein 1 isoform X2 | 140890 | SREK1 | 503 | nan | nan	XP_016864544	38.63	6	2	2		1337.8	700.44	990.42	0	0	0	1337.8	700.44	990.42	0	0	0	1.00:0.52:0.74:0:0:0	1009.5	0	1009.5	0	#DIV/0!	1.00:0	56241
1403	12823	| splicing regulatory glutamine/lysine-rich protein 1 isoform f | 140890 | SREK1 | 538 | nan | nan	NP_001310462	38.63	6	2	2		1337.8	700.44	990.42	0	0	0	1337.8	700.44	990.42	0	0	0	1.00:0.52:0.74:0:0:0	1009.5	0	1009.5	0	#DIV/0!	1.00:0	61597
1403	12824	| splicing regulatory glutamine/lysine-rich protein 1 isoform e | 140890 | SREK1 | 623 | nan | nan	NP_001310458	38.63	5	2	2		1337.8	700.44	990.42	0	0	0	1337.8	700.44	990.42	0	0	0	1.00:0.52:0.74:0:0:0	1009.5	0	1009.5	0	#DIV/0!	1.00:0	71562
1403	12825	| splicing regulatory glutamine/lysine-rich protein 1 isoform a | 140890 | SREK1 | 624 | Q8WXA9 | sp	NP_001070667	38.63	5	2	2		1337.8	700.44	990.42	0	0	0	1337.8	700.44	990.42	0	0	0	1.00:0.52:0.74:0:0:0	1009.5	0	1009.5	0	#DIV/0!	1.00:0	71650
1908	17157	| 60S acidic ribosomal protein P1 isoform 1 | 6176 | RPLP1 | 114 | P05386 | sp	NP_000994	38.63	14	1	1		1712.8	1367.8	2463.8	0	0	0	1712.8	1367.8	2463.8	0	0	0	1.00:0.80:1.44:0:0:0	1848.1	0	1848.1	0	#DIV/0!	1.00:0	11514
1404	13902	| histone H1.2 | 3006 | HIST1H1C | 213 | P16403 | sp	NP_005310	38.61	8	1	1	Acetylation (Protein N-term)	313.14	287.08	602.2	0	0	0	313.14	287.08	602.2	0	0	0	1.00:0.92:1.92:0:0:0	400.81	0	400.81	0	#DIV/0!	1.00:0	21365
1665	10412	| baculoviral IAP repeat-containing protein 6 isoform X10 | 57448 | BIRC6 | 4847 | nan | nan	XP_016860046	38.59	0	1	1		262.71	475.15	549.4	0	0	0	262.71	475.15	549.4	0	0	0	1.00:1.81:2.09:0:0:0	429.09	0	429.09	0	#DIV/0!	1.00:0	529205
1665	10417	| baculoviral IAP repeat-containing protein 6 isoform X15 | 57448 | BIRC6 | 4715 | nan | nan	XP_016860048	38.59	0	1	1		262.71	475.15	549.4	0	0	0	262.71	475.15	549.4	0	0	0	1.00:1.81:2.09:0:0:0	429.09	0	429.09	0	#DIV/0!	1.00:0	514029
1665	10418	| baculoviral IAP repeat-containing protein 6 isoform X14 | 57448 | BIRC6 | 4779 | nan | nan	XP_011531305	38.59	0	1	1		262.71	475.15	549.4	0	0	0	262.71	475.15	549.4	0	0	0	1.00:1.81:2.09:0:0:0	429.09	0	429.09	0	#DIV/0!	1.00:0	523413
1665	10419	| baculoviral IAP repeat-containing protein 6 isoform X13 | 57448 | BIRC6 | 4837 | nan | nan	XP_016860047	38.59	0	1	1		262.71	475.15	549.4	0	0	0	262.71	475.15	549.4	0	0	0	1.00:1.81:2.09:0:0:0	429.09	0	429.09	0	#DIV/0!	1.00:0	528054
1665	10420	| baculoviral IAP repeat-containing protein 6 isoform X12 | 57448 | BIRC6 | 4840 | nan | nan	XP_005264512	38.59	0	1	1		262.71	475.15	549.4	0	0	0	262.71	475.15	549.4	0	0	0	1.00:1.81:2.09:0:0:0	429.09	0	429.09	0	#DIV/0!	1.00:0	528327
1665	10421	| baculoviral IAP repeat-containing protein 6 isoform X11 | 57448 | BIRC6 | 4847 | nan | nan	XP_005264511	38.59	0	1	1		262.71	475.15	549.4	0	0	0	262.71	475.15	549.4	0	0	0	1.00:1.81:2.09:0:0:0	429.09	0	429.09	0	#DIV/0!	1.00:0	529086
1665	10422	| baculoviral IAP repeat-containing protein 6 isoform X9 | 57448 | BIRC6 | 4851 | nan | nan	XP_006712119	38.59	0	1	1		262.71	475.15	549.4	0	0	0	262.71	475.15	549.4	0	0	0	1.00:1.81:2.09:0:0:0	429.09	0	429.09	0	#DIV/0!	1.00:0	529610
1665	10423	| baculoviral IAP repeat-containing protein 6 isoform X8 | 57448 | BIRC6 | 4858 | nan | nan	XP_016860045	38.59	0	1	1		262.71	475.15	549.4	0	0	0	262.71	475.15	549.4	0	0	0	1.00:1.81:2.09:0:0:0	429.09	0	429.09	0	#DIV/0!	1.00:0	530688
1665	10424	| baculoviral IAP repeat-containing protein 6 isoform X7 | 57448 | BIRC6 | 4861 | nan | nan	XP_005264510	38.59	0	1	1		262.71	475.15	549.4	0	0	0	262.71	475.15	549.4	0	0	0	1.00:1.81:2.09:0:0:0	429.09	0	429.09	0	#DIV/0!	1.00:0	530679
1665	10425	| baculoviral IAP repeat-containing protein 6 isoform X6 | 57448 | BIRC6 | 4864 | nan | nan	XP_006712118	38.59	0	1	1		262.71	475.15	549.4	0	0	0	262.71	475.15	549.4	0	0	0	1.00:1.81:2.09:0:0:0	429.09	0	429.09	0	#DIV/0!	1.00:0	531236
1665	10426	| baculoviral IAP repeat-containing protein 6 isoform X5 | 57448 | BIRC6 | 4870 | nan | nan	XP_005264509	38.59	0	1	1		262.71	475.15	549.4	0	0	0	262.71	475.15	549.4	0	0	0	1.00:1.81:2.09:0:0:0	429.09	0	429.09	0	#DIV/0!	1.00:0	531782
1665	10427	| baculoviral IAP repeat-containing protein 6 isoform X4 | 57448 | BIRC6 | 4875 | nan | nan	XP_005264508	38.59	0	1	1		262.71	475.15	549.4	0	0	0	262.71	475.15	549.4	0	0	0	1.00:1.81:2.09:0:0:0	429.09	0	429.09	0	#DIV/0!	1.00:0	532234
1665	10428	| baculoviral IAP repeat-containing protein 6 isoform X3 | 57448 | BIRC6 | 4878 | nan | nan	XP_006712117	38.59	0	1	1		262.71	475.15	549.4	0	0	0	262.71	475.15	549.4	0	0	0	1.00:1.81:2.09:0:0:0	429.09	0	429.09	0	#DIV/0!	1.00:0	532789
1665	10429	| baculoviral IAP repeat-containing protein 6 isoform X2 | 57448 | BIRC6 | 4880 | nan | nan	XP_005264507	38.59	0	1	1		262.71	475.15	549.4	0	0	0	262.71	475.15	549.4	0	0	0	1.00:1.81:2.09:0:0:0	429.09	0	429.09	0	#DIV/0!	1.00:0	532933
1665	10430	| baculoviral IAP repeat-containing protein 6 isoform X1 | 57448 | BIRC6 | 4884 | nan | nan	XP_005264506	38.59	0	1	1		262.71	475.15	549.4	0	0	0	262.71	475.15	549.4	0	0	0	1.00:1.81:2.09:0:0:0	429.09	0	429.09	0	#DIV/0!	1.00:0	533338
1659	14082	| eukaryotic translation initiation factor 4B isoform 3 | 1975 | EIF4B | 572 | P23588 | sp	NP_001317583	38.59	6	2	2		369.19	303.01	641.37	0	0	0	369.19	303.01	641.37	0	0	0	1.00:0.82:1.74:0:0:0	656.78	0	656.78	0	#DIV/0!	1.00:0	64805
1659	14083	| eukaryotic translation initiation factor 4B isoform 2 | 1975 | EIF4B | 611 | P23588 | sp	NP_001408	38.59	6	2	2		369.19	303.01	641.37	0	0	0	369.19	303.01	641.37	0	0	0	1.00:0.82:1.74:0:0:0	656.78	0	656.78	0	#DIV/0!	1.00:0	69151
1659	14084	| eukaryotic translation initiation factor 4B isoform 1 | 1975 | EIF4B | 616 | B4DRM3 | tr	NP_001287750	38.59	6	2	2		369.19	303.01	641.37	0	0	0	369.19	303.01	641.37	0	0	0	1.00:0.82:1.74:0:0:0	656.78	0	656.78	0	#DIV/0!	1.00:0	69698
852	6795	| protein NOXP20 isoform 5 | 92689 | FAM114A1 | 561 | nan | nan	NP_001337561	38.58	12	4	4		855.6	894.32	1728.2	0	0	0	855.6	894.32	1517.7	0	0	0	1.00:1.05:1.77:0:0:0	1533.6	0	1323.1	0	#DIV/0!	1.00:0	60527
852	6796	| protein NOXP20 isoform X1 | 92689 | FAM114A1 | 563 | Q8IWE2 | sp	XP_005262729	38.58	12	4	4		855.6	894.32	1728.2	0	0	0	855.6	894.32	1517.7	0	0	0	1.00:1.05:1.77:0:0:0	1533.6	0	1323.1	0	#DIV/0!	1.00:0	60742
852	6797	| protein NOXP20 isoform 1 | 92689 | FAM114A1 | 563 | Q8IWE2 | sp	NP_612398	38.58	12	4	4		855.6	894.32	1728.2	0	0	0	855.6	894.32	1517.7	0	0	0	1.00:1.05:1.77:0:0:0	1533.6	0	1323.1	0	#DIV/0!	1.00:0	60742
1551	14020	| aurora kinase B isoform X2 | 9212 | AURKB | 271 | nan | nan	XP_016880797	38.58	10	2	2		929.11	466.04	673.87	0	0	0	929.11	466.04	673.87	0	0	0	1.00:0.50:0.73:0:0:0	996.35	0	996.35	0	#DIV/0!	1.00:0	30752
1551	14021	| aurora kinase B isoform X1 | 9212 | AURKB | 303 | Q96GD4 | sp	XP_011522374	38.58	9	2	2		929.11	466.04	673.87	0	0	0	929.11	466.04	673.87	0	0	0	1.00:0.50:0.73:0:0:0	996.35	0	996.35	0	#DIV/0!	1.00:0	34760
1551	14022	| aurora kinase B isoform 2 | 9212 | AURKB | 303 | Q96GD4 | sp	NP_001243763	38.58	9	2	2		929.11	466.04	673.87	0	0	0	929.11	466.04	673.87	0	0	0	1.00:0.50:0.73:0:0:0	996.35	0	996.35	0	#DIV/0!	1.00:0	34760
1551	14023	| aurora kinase B isoform 2 | 9212 | AURKB | 303 | Q96GD4 | sp	NP_001300880	38.58	9	2	2		929.11	466.04	673.87	0	0	0	929.11	466.04	673.87	0	0	0	1.00:0.50:0.73:0:0:0	996.35	0	996.35	0	#DIV/0!	1.00:0	34760
1551	14024	| aurora kinase B isoform X1 | 9212 | AURKB | 303 | Q96GD4 | sp	XP_016880796	38.58	9	2	2		929.11	466.04	673.87	0	0	0	929.11	466.04	673.87	0	0	0	1.00:0.50:0.73:0:0:0	996.35	0	996.35	0	#DIV/0!	1.00:0	34760
1551	14025	| aurora kinase B isoform 4 | 9212 | AURKB | 304 | Q96GD4 | sp	NP_001300881	38.58	9	2	2		929.11	466.04	673.87	0	0	0	929.11	466.04	673.87	0	0	0	1.00:0.50:0.73:0:0:0	996.35	0	996.35	0	#DIV/0!	1.00:0	34916
1551	14026	| aurora kinase B isoform 5 | 9212 | AURKB | 312 | Q96GD4 | sp	NP_001300882	38.58	9	2	2		929.11	466.04	673.87	0	0	0	929.11	466.04	673.87	0	0	0	1.00:0.50:0.73:0:0:0	996.35	0	996.35	0	#DIV/0!	1.00:0	35302
1551	14027	| aurora kinase B isoform 1 | 9212 | AURKB | 344 | Q96GD4 | sp	NP_001300879	38.58	8	2	2		929.11	466.04	673.87	0	0	0	929.11	466.04	673.87	0	0	0	1.00:0.50:0.73:0:0:0	996.35	0	996.35	0	#DIV/0!	1.00:0	39311
1551	14028	| aurora kinase B isoform 1 | 9212 | AURKB | 344 | Q96GD4 | sp	NP_004208	38.58	8	2	2		929.11	466.04	673.87	0	0	0	929.11	466.04	673.87	0	0	0	1.00:0.50:0.73:0:0:0	996.35	0	996.35	0	#DIV/0!	1.00:0	39311
1551	14029	| aurora kinase B isoform 3 | 9212 | AURKB | 345 | Q96GD4 | sp	NP_001271455	38.58	8	2	2		929.11	466.04	673.87	0	0	0	929.11	466.04	673.87	0	0	0	1.00:0.50:0.73:0:0:0	996.35	0	996.35	0	#DIV/0!	1.00:0	39467
811	6529	| 60S ribosomal protein L18a | 6142 | RPL18A | 176 | Q02543 | sp	NP_000971	38.55	26	5	5	Carbamidomethylation	22441	17533	18358	1819.1	2180.4	2625	20794	15143	16456	1819.1	2180.4	2625	1.00:0.73:0.79:0.09:0.10:0.13	19444	2426.9	17464	2426.9	7.19601	1.00:0.14	20762
1158	9011	| MAP/microtubule affinity-regulating kinase 3 isoform X23 | 4140 | MARK3 | 572 | nan | nan	XP_024305359	38.51	9	3	3	Carbamidomethylation	807.37	540.19	1047.6	0	0	0	807.37	540.19	1047.6	0	0	0	1.00:0.67:1.30:0:0:0	985.56	0	985.56	0	#DIV/0!	1.00:0	63566
1158	9012	| MAP/microtubule affinity-regulating kinase 3 isoform X23 | 4140 | MARK3 | 572 | nan | nan	XP_024305358	38.51	9	3	3	Carbamidomethylation	807.37	540.19	1047.6	0	0	0	807.37	540.19	1047.6	0	0	0	1.00:0.67:1.30:0:0:0	985.56	0	985.56	0	#DIV/0!	1.00:0	63566
1158	9013	| MAP/microtubule affinity-regulating kinase 3 isoform X22 | 4140 | MARK3 | 587 | nan | nan	XP_024305357	38.51	9	3	3	Carbamidomethylation	807.37	540.19	1047.6	0	0	0	807.37	540.19	1047.6	0	0	0	1.00:0.67:1.30:0:0:0	985.56	0	985.56	0	#DIV/0!	1.00:0	65375
1158	9014	| MAP/microtubule affinity-regulating kinase 3 isoform X20 | 4140 | MARK3 | 596 | nan | nan	XP_016876796	38.51	8	3	3	Carbamidomethylation	807.37	540.19	1047.6	0	0	0	807.37	540.19	1047.6	0	0	0	1.00:0.67:1.30:0:0:0	985.56	0	985.56	0	#DIV/0!	1.00:0	66555
1158	9015	| MAP/microtubule affinity-regulating kinase 3 isoform X20 | 4140 | MARK3 | 596 | nan | nan	XP_016876795	38.51	8	3	3	Carbamidomethylation	807.37	540.19	1047.6	0	0	0	807.37	540.19	1047.6	0	0	0	1.00:0.67:1.30:0:0:0	985.56	0	985.56	0	#DIV/0!	1.00:0	66555
1158	9016	| MAP/microtubule affinity-regulating kinase 3 isoform X18 | 4140 | MARK3 | 598 | nan | nan	XP_024305355	38.51	8	3	3	Carbamidomethylation	807.37	540.19	1047.6	0	0	0	807.37	540.19	1047.6	0	0	0	1.00:0.67:1.30:0:0:0	985.56	0	985.56	0	#DIV/0!	1.00:0	66581
1158	9017	| MAP/microtubule affinity-regulating kinase 3 isoform X17 | 4140 | MARK3 | 607 | nan | nan	XP_024305354	38.51	8	3	3	Carbamidomethylation	807.37	540.19	1047.6	0	0	0	807.37	540.19	1047.6	0	0	0	1.00:0.67:1.30:0:0:0	985.56	0	985.56	0	#DIV/0!	1.00:0	67761
1158	9018	| MAP/microtubule affinity-regulating kinase 3 isoform X16 | 4140 | MARK3 | 613 | nan | nan	XP_024305353	38.51	8	3	3	Carbamidomethylation	807.37	540.19	1047.6	0	0	0	807.37	540.19	1047.6	0	0	0	1.00:0.67:1.30:0:0:0	985.56	0	985.56	0	#DIV/0!	1.00:0	68390
1158	9019	| MAP/microtubule affinity-regulating kinase 3 isoform X15 | 4140 | MARK3 | 622 | nan | nan	XP_024305352	38.51	8	3	3	Carbamidomethylation	807.37	540.19	1047.6	0	0	0	807.37	540.19	1047.6	0	0	0	1.00:0.67:1.30:0:0:0	985.56	0	985.56	0	#DIV/0!	1.00:0	69570
1158	9020	| MAP/microtubule affinity-regulating kinase 3 isoform X15 | 4140 | MARK3 | 622 | nan | nan	XP_016876790	38.51	8	3	3	Carbamidomethylation	807.37	540.19	1047.6	0	0	0	807.37	540.19	1047.6	0	0	0	1.00:0.67:1.30:0:0:0	985.56	0	985.56	0	#DIV/0!	1.00:0	69570
1158	9021	| MAP/microtubule affinity-regulating kinase 3 isoform X12 | 4140 | MARK3 | 665 | nan | nan	XP_016876787	38.51	8	3	3	Carbamidomethylation	807.37	540.19	1047.6	0	0	0	807.37	540.19	1047.6	0	0	0	1.00:0.67:1.30:0:0:0	985.56	0	985.56	0	#DIV/0!	1.00:0	74412
1158	9022	| MAP/microtubule affinity-regulating kinase 3 isoform X10 | 4140 | MARK3 | 673 | nan | nan	XP_011535071	38.51	7	3	3	Carbamidomethylation	807.37	540.19	1047.6	0	0	0	807.37	540.19	1047.6	0	0	0	1.00:0.67:1.30:0:0:0	985.56	0	985.56	0	#DIV/0!	1.00:0	75590
1158	9023	| MAP/microtubule affinity-regulating kinase 3 isoform X9 | 4140 | MARK3 | 674 | nan | nan	XP_016876785	38.51	7	3	3	Carbamidomethylation	807.37	540.19	1047.6	0	0	0	807.37	540.19	1047.6	0	0	0	1.00:0.67:1.30:0:0:0	985.56	0	985.56	0	#DIV/0!	1.00:0	75593
1158	9024	| MAP/microtubule affinity-regulating kinase 3 isoform X8 | 4140 | MARK3 | 680 | nan | nan	XP_016876784	38.51	7	3	3	Carbamidomethylation	807.37	540.19	1047.6	0	0	0	807.37	540.19	1047.6	0	0	0	1.00:0.67:1.30:0:0:0	985.56	0	985.56	0	#DIV/0!	1.00:0	76221
1158	9025	| MAP/microtubule affinity-regulating kinase 3 isoform X7 | 4140 | MARK3 | 689 | nan | nan	XP_016876783	38.51	7	3	3	Carbamidomethylation	807.37	540.19	1047.6	0	0	0	807.37	540.19	1047.6	0	0	0	1.00:0.67:1.30:0:0:0	985.56	0	985.56	0	#DIV/0!	1.00:0	77402
1158	9026	| MAP/microtubule affinity-regulating kinase 3 isoform c | 4140 | MARK3 | 729 | P27448 | sp	NP_002367	38.51	7	3	3	Carbamidomethylation	807.37	540.19	1047.6	0	0	0	807.37	540.19	1047.6	0	0	0	1.00:0.67:1.30:0:0:0	985.56	0	985.56	0	#DIV/0!	1.00:0	81439
1158	9027	| MAP/microtubule affinity-regulating kinase 3 isoform X2 | 4140 | MARK3 | 738 | nan | nan	XP_005267698	38.51	7	3	3	Carbamidomethylation	807.37	540.19	1047.6	0	0	0	807.37	540.19	1047.6	0	0	0	1.00:0.67:1.30:0:0:0	985.56	0	985.56	0	#DIV/0!	1.00:0	82620
1158	9028	| MAP/microtubule affinity-regulating kinase 3 isoform X1 | 4140 | MARK3 | 739 | nan | nan	XP_024305351	38.51	7	3	3	Carbamidomethylation	807.37	540.19	1047.6	0	0	0	807.37	540.19	1047.6	0	0	0	1.00:0.67:1.30:0:0:0	985.56	0	985.56	0	#DIV/0!	1.00:0	82932
1158	9029	| MAP/microtubule affinity-regulating kinase 3 isoform b | 4140 | MARK3 | 744 | P27448 | sp	NP_001122391	38.51	7	3	3	Carbamidomethylation	807.37	540.19	1047.6	0	0	0	807.37	540.19	1047.6	0	0	0	1.00:0.67:1.30:0:0:0	985.56	0	985.56	0	#DIV/0!	1.00:0	83248
1158	9030	| MAP/microtubule affinity-regulating kinase 3 isoform a | 4140 | MARK3 | 753 | P27448 | sp	NP_001122390	38.51	7	3	3	Carbamidomethylation	807.37	540.19	1047.6	0	0	0	807.37	540.19	1047.6	0	0	0	1.00:0.67:1.30:0:0:0	985.56	0	985.56	0	#DIV/0!	1.00:0	84428
1538	10847	| xaa-Pro aminopeptidase 1 isoform 5 | 7511 | XPNPEP1 | 623 | Q9NQW7 | sp	NP_001311061	38.5	5	2	2		261.92	392.47	574.98	0	0	0	261.92	392.47	574.98	0	0	0	1.00:1.50:2.20:0:0:0	614.68	0	614.68	0	#DIV/0!	1.00:0	69918
1538	11372	| xaa-Pro aminopeptidase 1 isoform 4 | 7511 | XPNPEP1 | 535 | nan | nan	NP_001311060	38.5	6	2	2		261.92	392.47	574.98	0	0	0	261.92	392.47	574.98	0	0	0	1.00:1.50:2.20:0:0:0	614.68	0	614.68	0	#DIV/0!	1.00:0	60136
1538	11373	| xaa-Pro aminopeptidase 1 isoform 3 | 7511 | XPNPEP1 | 552 | Q5T6H7 | tr	NP_001311057	38.5	5	2	2		261.92	392.47	574.98	0	0	0	261.92	392.47	574.98	0	0	0	1.00:1.50:2.20:0:0:0	614.68	0	614.68	0	#DIV/0!	1.00:0	62139
1538	11374	| xaa-Pro aminopeptidase 1 isoform X3 | 7511 | XPNPEP1 | 552 | Q5T6H7 | tr	XP_016872104	38.5	5	2	2		261.92	392.47	574.98	0	0	0	261.92	392.47	574.98	0	0	0	1.00:1.50:2.20:0:0:0	614.68	0	614.68	0	#DIV/0!	1.00:0	62139
1538	11375	| xaa-Pro aminopeptidase 1 isoform X3 | 7511 | XPNPEP1 | 552 | Q5T6H7 | tr	XP_016872103	38.5	5	2	2		261.92	392.47	574.98	0	0	0	261.92	392.47	574.98	0	0	0	1.00:1.50:2.20:0:0:0	614.68	0	614.68	0	#DIV/0!	1.00:0	62139
1538	11376	| xaa-Pro aminopeptidase 1 isoform X2 | 7511 | XPNPEP1 | 608 | nan | nan	XP_011538436	38.5	5	2	2		261.92	392.47	574.98	0	0	0	261.92	392.47	574.98	0	0	0	1.00:1.50:2.20:0:0:0	614.68	0	614.68	0	#DIV/0!	1.00:0	68638
1538	11377	| xaa-Pro aminopeptidase 1 isoform 8 | 7511 | XPNPEP1 | 649 | nan | nan	NP_001311064	38.5	5	2	2		261.92	392.47	574.98	0	0	0	261.92	392.47	574.98	0	0	0	1.00:1.50:2.20:0:0:0	614.68	0	614.68	0	#DIV/0!	1.00:0	72795
1538	11378	| xaa-Pro aminopeptidase 1 isoform 9 | 7511 | XPNPEP1 | 661 | nan | nan	NP_001311065	38.5	5	2	2		261.92	392.47	574.98	0	0	0	261.92	392.47	574.98	0	0	0	1.00:1.50:2.20:0:0:0	614.68	0	614.68	0	#DIV/0!	1.00:0	74164
1538	11379	| xaa-Pro aminopeptidase 1 isoform 1 | 7511 | XPNPEP1 | 666 | Q9NQW7 | sp	NP_065116	38.5	5	2	2		261.92	392.47	574.98	0	0	0	261.92	392.47	574.98	0	0	0	1.00:1.50:2.20:0:0:0	614.68	0	614.68	0	#DIV/0!	1.00:0	74798
1538	11380	| xaa-Pro aminopeptidase 1 isoform 6 | 7511 | XPNPEP1 | 695 | nan | nan	NP_001311062	38.5	4	2	2		261.92	392.47	574.98	0	0	0	261.92	392.47	574.98	0	0	0	1.00:1.50:2.20:0:0:0	614.68	0	614.68	0	#DIV/0!	1.00:0	77563
2224	17714	| serpin B9 isoform X2 | 5272 | SERPINB9 | 325 | nan | nan	XP_016866432	38.42	5	1	1		458.57	197.71	364.49	0	0	0	458.57	197.71	364.49	0	0	0	1.00:0.43:0.79:0:0:0	340.26	0	340.26	0	#DIV/0!	1.00:0	37100
2224	17715	| serpin B9 isoform X2 | 5272 | SERPINB9 | 325 | nan | nan	XP_011512980	38.42	5	1	1		458.57	197.71	364.49	0	0	0	458.57	197.71	364.49	0	0	0	1.00:0.43:0.79:0:0:0	340.26	0	340.26	0	#DIV/0!	1.00:0	37100
2224	17716	| serpin B9 isoform X2 | 5272 | SERPINB9 | 325 | nan | nan	XP_016866431	38.42	5	1	1		458.57	197.71	364.49	0	0	0	458.57	197.71	364.49	0	0	0	1.00:0.43:0.79:0:0:0	340.26	0	340.26	0	#DIV/0!	1.00:0	37100
990	7118	| ribosome production factor 2 homolog isoform 1 | 84154 | RPF2 | 306 | Q9H7B2 | sp	NP_115570	38.42	19	4	4	Carbamidomethylation	2003.4	2300.2	3332.7	0	0	0	1638	2300.2	2886.4	0	0	0	1.00:1.40:1.76:0:0:0	3246.5	0	2840.6	0	#DIV/0!	1.00:0	35583
990	7352	| ribosome production factor 2 homolog isoform 2 | 84154 | RPF2 | 243 | nan | nan	NP_001276040	38.42	24	4	4	Carbamidomethylation	2003.4	2300.2	3332.7	0	0	0	1638	2300.2	2886.4	0	0	0	1.00:1.40:1.76:0:0:0	3246.5	0	2840.6	0	#DIV/0!	1.00:0	28443
752	5738	| ras-related protein Rab-14 | 51552 | RAB14 | 215 | P61106 | sp	NP_057406	38.4	39	6	6		4089.9	4303.8	3995.9	412.71	348.56	902.51	2900.6	2601.2	2336.7	412.71	348.56	473.78	1.00:0.90:0.81:0.14:0.12:0.16	4329	840.41	2612.8	411.68	6.34668	1.00:0.16	23897
1807	13232	| transmembrane 9 superfamily member 3 precursor | 56889 | TM9SF3 | 589 | Q9HD45 | sp	NP_064508	38.39	5	2	2	Carbamidomethylation	411.36	367.06	724.98	0	0	0	411.36	367.06	724.98	0	0	0	1.00:0.89:1.76:0:0:0	697.85	0	697.85	0	#DIV/0!	1.00:0	67888
1807	13740	| transmembrane 9 superfamily member 3 isoform X2 | 56889 | TM9SF3 | 593 | nan | nan	XP_011538279	38.39	5	2	2	Carbamidomethylation	411.36	367.06	724.98	0	0	0	411.36	367.06	724.98	0	0	0	1.00:0.89:1.76:0:0:0	697.85	0	697.85	0	#DIV/0!	1.00:0	68529
1807	13741	| transmembrane 9 superfamily member 3 isoform X1 | 56889 | TM9SF3 | 607 | nan | nan	XP_011538278	38.39	5	2	2	Carbamidomethylation	411.36	367.06	724.98	0	0	0	411.36	367.06	724.98	0	0	0	1.00:0.89:1.76:0:0:0	697.85	0	697.85	0	#DIV/0!	1.00:0	70244
1829	12630	| translation initiation factor IF-2 mitochondrial isoform X2 | 4528 | MTIF2 | 668 | nan | nan	XP_016859653	38.34	4	2	2		494.9	256.25	497.9	0	0	0	494.9	256.25	497.9	0	0	0	1.00:0.52:1.01:0:0:0	494.69	0	494.69	0	#DIV/0!	1.00:0	75156
1829	12631	| translation initiation factor IF-2 mitochondrial isoform a | 4528 | MTIF2 | 727 | P46199 | sp	NP_001307930	38.34	4	2	2		494.9	256.25	497.9	0	0	0	494.9	256.25	497.9	0	0	0	1.00:0.52:1.01:0:0:0	494.69	0	494.69	0	#DIV/0!	1.00:0	81317
1829	12632	| translation initiation factor IF-2 mitochondrial isoform a | 4528 | MTIF2 | 727 | P46199 | sp	NP_001005369	38.34	4	2	2		494.9	256.25	497.9	0	0	0	494.9	256.25	497.9	0	0	0	1.00:0.52:1.01:0:0:0	494.69	0	494.69	0	#DIV/0!	1.00:0	81317
1829	12633	| translation initiation factor IF-2 mitochondrial isoform X1 | 4528 | MTIF2 | 727 | P46199 | sp	XP_011531173	38.34	4	2	2		494.9	256.25	497.9	0	0	0	494.9	256.25	497.9	0	0	0	1.00:0.52:1.01:0:0:0	494.69	0	494.69	0	#DIV/0!	1.00:0	81317
1829	12634	| translation initiation factor IF-2 mitochondrial isoform a | 4528 | MTIF2 | 727 | P46199 | sp	NP_002444	38.34	4	2	2		494.9	256.25	497.9	0	0	0	494.9	256.25	497.9	0	0	0	1.00:0.52:1.01:0:0:0	494.69	0	494.69	0	#DIV/0!	1.00:0	81317
1829	12635	| translation initiation factor IF-2 mitochondrial isoform X1 | 4528 | MTIF2 | 727 | P46199 | sp	XP_016859651	38.34	4	2	2		494.9	256.25	497.9	0	0	0	494.9	256.25	497.9	0	0	0	1.00:0.52:1.01:0:0:0	494.69	0	494.69	0	#DIV/0!	1.00:0	81317
1829	12636	| translation initiation factor IF-2 mitochondrial isoform a | 4528 | MTIF2 | 727 | P46199 | sp	NP_001307933	38.34	4	2	2		494.9	256.25	497.9	0	0	0	494.9	256.25	497.9	0	0	0	1.00:0.52:1.01:0:0:0	494.69	0	494.69	0	#DIV/0!	1.00:0	81317
1829	12637	| translation initiation factor IF-2 mitochondrial isoform X1 | 4528 | MTIF2 | 727 | P46199 | sp	XP_005264392	38.34	4	2	2		494.9	256.25	497.9	0	0	0	494.9	256.25	497.9	0	0	0	1.00:0.52:1.01:0:0:0	494.69	0	494.69	0	#DIV/0!	1.00:0	81317
1829	12638	| translation initiation factor IF-2 mitochondrial isoform X1 | 4528 | MTIF2 | 727 | P46199 | sp	XP_016859652	38.34	4	2	2		494.9	256.25	497.9	0	0	0	494.9	256.25	497.9	0	0	0	1.00:0.52:1.01:0:0:0	494.69	0	494.69	0	#DIV/0!	1.00:0	81317
1829	12639	| translation initiation factor IF-2 mitochondrial isoform a | 4528 | MTIF2 | 727 | P46199 | sp	NP_001307931	38.34	4	2	2		494.9	256.25	497.9	0	0	0	494.9	256.25	497.9	0	0	0	1.00:0.52:1.01:0:0:0	494.69	0	494.69	0	#DIV/0!	1.00:0	81317
1829	12640	| translation initiation factor IF-2 mitochondrial isoform a | 4528 | MTIF2 | 727 | P46199 | sp	NP_001307932	38.34	4	2	2		494.9	256.25	497.9	0	0	0	494.9	256.25	497.9	0	0	0	1.00:0.52:1.01:0:0:0	494.69	0	494.69	0	#DIV/0!	1.00:0	81317
1937	18381	| copper transport protein ATOX1 | 475 | ATOX1 | 68 | O00244 | sp	NP_004036	38.32	40	2	2	Carbamidomethylation	711.04	609.08	1141.8	0	0	0	711.04	609.08	1141.8	0	0	0	1.00:0.86:1.61:0:0:0	1125.6	0	1125.6	0	#DIV/0!	1.00:0	7402
2156	14793	| gelsolin isoform X2 | 2934 | GSN | 761 | nan | nan	XP_011516887	38.32	4	2	2		364.29	435.69	183.54	0	0	0	364.29	435.69	183.54	0	0	0	1.00:1.20:0.50:0:0:0	709.61	0	709.61	0	#DIV/0!	1.00:0	83890
2156	14794	| gelsolin isoform X1 | 2934 | GSN | 780 | nan | nan	XP_024303290	38.32	4	2	2		364.29	435.69	183.54	0	0	0	364.29	435.69	183.54	0	0	0	1.00:1.20:0.50:0:0:0	709.61	0	709.61	0	#DIV/0!	1.00:0	86110
978	5942	| eukaryotic translation initiation factor 5B | 9669 | EIF5B | 1220 | O60841 | sp	NP_056988	38.31	7	6	6		1592.7	2197.2	1958	0	0	0	871.87	1552.7	1383.8	0	0	0	1.00:1.78:1.59:0:0:0	2416.9	0	1454.9	0	#DIV/0!	1.00:0	138827
1286	12184	| zinc transporter 7 isoform X1 | 148867 | SLC30A7 | 376 | Q8NEW0 | sp	XP_016855889	38.27	15	4	4	Carbamidomethylation; Acetylation (Protein N-term)	2882.8	1516.8	2395.4	0	0	0	2553.6	1516.8	2395.4	0	0	0	1.00:0.59:0.94:0:0:0	2605.6	0	2276.4	0	#DIV/0!	1.00:0	41626
1286	12185	| zinc transporter 7 | 148867 | SLC30A7 | 376 | Q8NEW0 | sp	NP_001138356	38.27	15	4	4	Carbamidomethylation; Acetylation (Protein N-term)	2882.8	1516.8	2395.4	0	0	0	2553.6	1516.8	2395.4	0	0	0	1.00:0.59:0.94:0:0:0	2605.6	0	2276.4	0	#DIV/0!	1.00:0	41626
1286	12186	| zinc transporter 7 | 148867 | SLC30A7 | 376 | Q8NEW0 | sp	NP_598003	38.27	15	4	4	Carbamidomethylation; Acetylation (Protein N-term)	2882.8	1516.8	2395.4	0	0	0	2553.6	1516.8	2395.4	0	0	0	1.00:0.59:0.94:0:0:0	2605.6	0	2276.4	0	#DIV/0!	1.00:0	41626
393	2575	| histone-lysine N-methyltransferase NSD2 isoform X2 | 7468 | NSD2 | 1296 | nan | nan	XP_005248059	38.26	12	10	10	Carbamidomethylation	5629.1	4027.7	6287.1	0	0	0	2987.8	1753.2	2645.8	0	0	0	1.00:0.59:0.89:0:0:0	5670.3	0	2462.3	0	#DIV/0!	1.00:0	145063
393	2580	| histone-lysine N-methyltransferase NSD2 isoform 1 | 7468 | NSD2 | 1365 | O96028 | sp	NP_579878	38.26	12	10	10	Carbamidomethylation	5629.1	4027.7	6287.1	0	0	0	2987.8	1753.2	2645.8	0	0	0	1.00:0.59:0.89:0:0:0	5670.3	0	2462.3	0	#DIV/0!	1.00:0	152258
393	2581	| histone-lysine N-methyltransferase NSD2 isoform X1 | 7468 | NSD2 | 1365 | O96028 | sp	XP_005248058	38.26	12	10	10	Carbamidomethylation	5629.1	4027.7	6287.1	0	0	0	2987.8	1753.2	2645.8	0	0	0	1.00:0.59:0.89:0:0:0	5670.3	0	2462.3	0	#DIV/0!	1.00:0	152258
393	2582	| histone-lysine N-methyltransferase NSD2 isoform 1 | 7468 | NSD2 | 1365 | O96028 | sp	NP_579890	38.26	12	10	10	Carbamidomethylation	5629.1	4027.7	6287.1	0	0	0	2987.8	1753.2	2645.8	0	0	0	1.00:0.59:0.89:0:0:0	5670.3	0	2462.3	0	#DIV/0!	1.00:0	152258
393	2583	| histone-lysine N-methyltransferase NSD2 isoform 1 | 7468 | NSD2 | 1365 | O96028 | sp	NP_001035889	38.26	12	10	10	Carbamidomethylation	5629.1	4027.7	6287.1	0	0	0	2987.8	1753.2	2645.8	0	0	0	1.00:0.59:0.89:0:0:0	5670.3	0	2462.3	0	#DIV/0!	1.00:0	152258
393	2584	| histone-lysine N-methyltransferase NSD2 isoform 1 | 7468 | NSD2 | 1365 | O96028 | sp	NP_579877	38.26	12	10	10	Carbamidomethylation	5629.1	4027.7	6287.1	0	0	0	2987.8	1753.2	2645.8	0	0	0	1.00:0.59:0.89:0:0:0	5670.3	0	2462.3	0	#DIV/0!	1.00:0	152258
393	2585	| histone-lysine N-methyltransferase NSD2 isoform X1 | 7468 | NSD2 | 1365 | O96028 | sp	XP_011511859	38.26	12	10	10	Carbamidomethylation	5629.1	4027.7	6287.1	0	0	0	2987.8	1753.2	2645.8	0	0	0	1.00:0.59:0.89:0:0:0	5670.3	0	2462.3	0	#DIV/0!	1.00:0	152258
1173	8558	| protein arginine methyltransferase NDUFAF7 mitochondrial isoform | 55471 | NDUFAF7 | 399 | nan | nan	XP_005264467	38.26	6	2	2		820.59	636.19	279.4	0	0	0	820.59	636.19	279.4	0	0	0	1.00:0.78:0.34:0:0:0	868.09	0	868.09	0	#DIV/0!	1.00:0	44782
1173	8559	| protein arginine methyltransferase NDUFAF7 mitochondrial isoform 4 | 55471 | NDUFAF7 | 400 | nan | nan	NP_001336953	38.26	6	2	2		820.59	636.19	279.4	0	0	0	820.59	636.19	279.4	0	0	0	1.00:0.78:0.34:0:0:0	868.09	0	868.09	0	#DIV/0!	1.00:0	44421
1173	8560	| protein arginine methyltransferase NDUFAF7 mitochondrial isoform 1 | 55471 | NDUFAF7 | 441 | Q7L592 | sp	NP_653337	38.26	5	2	2		820.59	636.19	279.4	0	0	0	820.59	636.19	279.4	0	0	0	1.00:0.78:0.34:0:0:0	868.09	0	868.09	0	#DIV/0!	1.00:0	49238
1173	8725	| protein arginine methyltransferase NDUFAF7 mitochondrial isoform 5 | 55471 | NDUFAF7 | 373 | nan | nan	NP_001336954	38.26	6	2	2		820.59	636.19	279.4	0	0	0	820.59	636.19	279.4	0	0	0	1.00:0.78:0.34:0:0:0	868.09	0	868.09	0	#DIV/0!	1.00:0	41324
1629	9146	| E3 ubiquitin-protein ligase HECTD1 isoform X4 | 25831 | HECTD1 | 2561 | nan | nan	XP_016876638	38.25	1	2	2		346.68	322.07	635.86	0	0	0	346.68	322.07	635.86	0	0	0	1.00:0.93:1.83:0:0:0	652.3	0	652.3	0	#DIV/0!	1.00:0	284223
1629	9147	| E3 ubiquitin-protein ligase HECTD1 isoform X3 | 25831 | HECTD1 | 2563 | nan | nan	XP_016876637	38.25	1	2	2		346.68	322.07	635.86	0	0	0	346.68	322.07	635.86	0	0	0	1.00:0.93:1.83:0:0:0	652.3	0	652.3	0	#DIV/0!	1.00:0	284453
1629	9148	| E3 ubiquitin-protein ligase HECTD1 isoform X2 | 25831 | HECTD1 | 2608 | nan | nan	XP_024305294	38.25	1	2	2		346.68	322.07	635.86	0	0	0	346.68	322.07	635.86	0	0	0	1.00:0.93:1.83:0:0:0	652.3	0	652.3	0	#DIV/0!	1.00:0	289137
1629	9149	| E3 ubiquitin-protein ligase HECTD1 isoform X2 | 25831 | HECTD1 | 2608 | nan | nan	XP_011534921	38.25	1	2	2		346.68	322.07	635.86	0	0	0	346.68	322.07	635.86	0	0	0	1.00:0.93:1.83:0:0:0	652.3	0	652.3	0	#DIV/0!	1.00:0	289137
1629	9150	| E3 ubiquitin-protein ligase HECTD1 | 25831 | HECTD1 | 2610 | Q9ULT8 | sp	NP_056197	38.25	1	2	2		346.68	322.07	635.86	0	0	0	346.68	322.07	635.86	0	0	0	1.00:0.93:1.83:0:0:0	652.3	0	652.3	0	#DIV/0!	1.00:0	289367
1629	9151	| E3 ubiquitin-protein ligase HECTD1 isoform X1 | 25831 | HECTD1 | 2610 | Q9ULT8 | sp	XP_005267559	38.25	1	2	2		346.68	322.07	635.86	0	0	0	346.68	322.07	635.86	0	0	0	1.00:0.93:1.83:0:0:0	652.3	0	652.3	0	#DIV/0!	1.00:0	289367
1629	9156	| E3 ubiquitin-protein ligase HECTD1 isoform X5 | 25831 | HECTD1 | 2549 | nan | nan	XP_024305295	38.25	1	2	2		346.68	322.07	635.86	0	0	0	346.68	322.07	635.86	0	0	0	1.00:0.93:1.83:0:0:0	652.3	0	652.3	0	#DIV/0!	1.00:0	282319
1629	9186	| E3 ubiquitin-protein ligase HECTD1 isoform X7 | 25831 | HECTD1 | 2329 | nan | nan	XP_016876641	38.25	1	2	2		346.68	322.07	635.86	0	0	0	346.68	322.07	635.86	0	0	0	1.00:0.93:1.83:0:0:0	652.3	0	652.3	0	#DIV/0!	1.00:0	260586
1629	9187	| E3 ubiquitin-protein ligase HECTD1 isoform X7 | 25831 | HECTD1 | 2329 | nan | nan	XP_016876642	38.25	1	2	2		346.68	322.07	635.86	0	0	0	346.68	322.07	635.86	0	0	0	1.00:0.93:1.83:0:0:0	652.3	0	652.3	0	#DIV/0!	1.00:0	260586
1629	9188	| E3 ubiquitin-protein ligase HECTD1 isoform X6 | 25831 | HECTD1 | 2331 | nan | nan	XP_016876640	38.25	1	2	2		346.68	322.07	635.86	0	0	0	346.68	322.07	635.86	0	0	0	1.00:0.93:1.83:0:0:0	652.3	0	652.3	0	#DIV/0!	1.00:0	260816
1629	9189	| E3 ubiquitin-protein ligase HECTD1 isoform X6 | 25831 | HECTD1 | 2331 | nan | nan	XP_011534923	38.25	1	2	2		346.68	322.07	635.86	0	0	0	346.68	322.07	635.86	0	0	0	1.00:0.93:1.83:0:0:0	652.3	0	652.3	0	#DIV/0!	1.00:0	260816
763	4840	| target of EGR1 protein 1 | 114034 | TOE1 | 510 | Q96GM8 | sp	NP_079353	38.24	25	8	8	Carbamidomethylation	1874.4	1785.5	2773.1	0	0	0	1651	915.99	1383.5	0	0	0	1.00:0.55:0.84:0:0:0	3029	0	1477	0	#DIV/0!	1.00:0	56548
1621	11669	| pyrroline-5-carboxylate reductase 2 isoform 2 | 29920 | PYCR2 | 246 | Q96C36 | sp	NP_001258610	38.24	12	2	2	Carbamidomethylation	1029.4	821.73	1514.9	0	0	0	1029.4	821.73	1514.9	0	0	0	1.00:0.80:1.47:0:0:0	1122	0	1122	0	#DIV/0!	1.00:0	25868
1621	11670	| pyrroline-5-carboxylate reductase 2 isoform 1 | 29920 | PYCR2 | 320 | Q96C36 | sp	NP_037460	38.24	9	2	2	Carbamidomethylation	1029.4	821.73	1514.9	0	0	0	1029.4	821.73	1514.9	0	0	0	1.00:0.80:1.47:0:0:0	1122	0	1122	0	#DIV/0!	1.00:0	33637
1484	10897	| 1 4-alpha-glucan-branching enzyme | 2632 | GBE1 | 702 | Q04446 | sp	NP_000149	38.21	4	2	2		378.78	233.27	505.49	0	0	0	378.78	233.27	505.49	0	0	0	1.00:0.62:1.33:0:0:0	586.03	0	586.03	0	#DIV/0!	1.00:0	80460
1999	13464	| succinate-semialdehyde dehydrogenase mitochondrial isoform 2 | 7915 | ALDH5A1 | 535 | P51649 | sp	NP_001071	38.2	6	2	2	Carbamidomethylation	325.15	414.72	665.07	0	0	0	325.15	414.72	665.07	0	0	0	1.00:1.28:2.05:0:0:0	643.79	0	643.79	0	#DIV/0!	1.00:0	57215
635	5871	| mitotic checkpoint protein BUB3 isoform b | 9184 | BUB3 | 326 | O43684 | sp	NP_001007794	38.12	24	6	6		7356.6	4930.2	5727	0	0	0	5574.9	3320.7	4197	0	0	0	1.00:0.60:0.75:0:0:0	6542.2	0	4901.8	0	#DIV/0!	1.00:0	36955
635	5873	| mitotic checkpoint protein BUB3 isoform a | 9184 | BUB3 | 328 | O43684 | sp	NP_004716	38.12	24	6	6		7356.6	4930.2	5727	0	0	0	5574.9	3320.7	4197	0	0	0	1.00:0.60:0.75:0:0:0	6542.2	0	4901.8	0	#DIV/0!	1.00:0	37155
848	4916	| ubiquitin carboxyl-terminal hydrolase 15 isoform 2 | 9958 | USP15 | 952 | Q9Y4E8 | sp	NP_006304	38.08	10	6	6	Carbamidomethylation	1559.7	2956.6	2064.6	0	0	0	1285	2155.5	1319	0	0	0	1.00:1.68:1.03:0:0:0	2708.3	0	1586.5	0	#DIV/0!	1.00:0	109297
848	4917	| ubiquitin carboxyl-terminal hydrolase 15 isoform 1 | 9958 | USP15 | 981 | Q9Y4E8 | sp	NP_001239007	38.08	9	6	6	Carbamidomethylation	1559.7	2956.6	2064.6	0	0	0	1285	2155.5	1319	0	0	0	1.00:1.68:1.03:0:0:0	2708.3	0	1586.5	0	#DIV/0!	1.00:0	112419
1016	9913	| UPF0598 protein C8orf82 | 414919 | C8orf82 | 216 | Q6P1X6 | sp	NP_001001795	38.04	26	4	4	Carbamidomethylation	1039.2	1559	2369.8	0	0	0	1039.2	1559	1837.4	0	0	0	1.00:1.50:1.77:0:0:0	2156.6	0	1624.2	0	#DIV/0!	1.00:0	23889
1906	20812	| tight junction-associated protein 1 isoform b | 93643 | TJAP1 | 547 | nan | nan	NP_001337498	38.02	4	2	2		347.15	574.92	277.55	0	0	0	347.15	574.92	277.55	0	0	0	1.00:1.66:0.80:0:0:0	560.3	0	560.3	0	#DIV/0!	1.00:0	60721
1906	20813	| tight junction-associated protein 1 isoform X2 | 93643 | TJAP1 | 547 | nan | nan	XP_024302355	38.02	4	2	2		347.15	574.92	277.55	0	0	0	347.15	574.92	277.55	0	0	0	1.00:1.66:0.80:0:0:0	560.3	0	560.3	0	#DIV/0!	1.00:0	60721
1906	20814	| tight junction-associated protein 1 isoform b | 93643 | TJAP1 | 547 | nan | nan	NP_001337499	38.02	4	2	2		347.15	574.92	277.55	0	0	0	347.15	574.92	277.55	0	0	0	1.00:1.66:0.80:0:0:0	560.3	0	560.3	0	#DIV/0!	1.00:0	60721
1906	20818	| tight junction-associated protein 1 isoform X1 | 93643 | TJAP1 | 557 | nan | nan	XP_024302354	38.02	4	2	2		347.15	574.92	277.55	0	0	0	347.15	574.92	277.55	0	0	0	1.00:1.66:0.80:0:0:0	560.3	0	560.3	0	#DIV/0!	1.00:0	61821
1548	7870	| zinc finger MYM-type protein 4 isoform X2 | 9202 | ZMYM4 | 1516 | Q5VZL5 | sp	XP_016858292	38.01	3	3	3	Carbamidomethylation	1007.7	608.11	1083	0	0	0	1007.7	608.11	1083	0	0	0	1.00:0.60:1.07:0:0:0	1034.5	0	1034.5	0	#DIV/0!	1.00:0	169236
1548	7871	| zinc finger MYM-type protein 4 isoform 2 | 9202 | ZMYM4 | 1516 | nan | nan	NP_001337067	38.01	3	3	3	Carbamidomethylation	1007.7	608.11	1083	0	0	0	1007.7	608.11	1083	0	0	0	1.00:0.60:1.07:0:0:0	1034.5	0	1034.5	0	#DIV/0!	1.00:0	169236
1548	7872	| zinc finger MYM-type protein 4 isoform 1 | 9202 | ZMYM4 | 1548 | Q5VZL5 | sp	NP_005086	38.01	3	3	3	Carbamidomethylation	1007.7	608.11	1083	0	0	0	1007.7	608.11	1083	0	0	0	1.00:0.60:1.07:0:0:0	1034.5	0	1034.5	0	#DIV/0!	1.00:0	172787
1548	7873	| zinc finger MYM-type protein 4 isoform X1 | 9202 | ZMYM4 | 1551 | nan | nan	XP_005271385	38.01	3	3	3	Carbamidomethylation	1007.7	608.11	1083	0	0	0	1007.7	608.11	1083	0	0	0	1.00:0.60:1.07:0:0:0	1034.5	0	1034.5	0	#DIV/0!	1.00:0	173072
1983	21201	| DNA-directed RNA polymerase I subunit RPA43 | 221830 | TWISTNB | 338 | Q3B726 | sp	NP_001002926	37.96	5	1	1		199.45	425.15	552.65	0	0	0	199.45	425.15	552.65	0	0	0	1.00:2.13:2.77:0:0:0	392.42	0	392.42	0	#DIV/0!	1.00:0	37432
1394	5634	| probable global transcription activator SNF2L1 isoform X2 | 6594 | SMARCA1 | 1048 | nan | nan	XP_005262519	37.96	1	1	1		425.81	199.12	355.68	0	0	0	425.81	199.12	355.68	0	0	0	1.00:0.47:0.84:0:0:0	326.87	0	326.87	0	#DIV/0!	1.00:0	121951
1394	5635	| probable global transcription activator SNF2L1 isoform a | 6594 | SMARCA1 | 1054 | P28370 | sp	NP_003060	37.96	1	1	1		425.81	199.12	355.68	0	0	0	425.81	199.12	355.68	0	0	0	1.00:0.47:0.84:0:0:0	326.87	0	326.87	0	#DIV/0!	1.00:0	122605
1394	5636	| probable global transcription activator SNF2L1 isoform X1 | 6594 | SMARCA1 | 1054 | P28370 | sp	XP_005262518	37.96	1	1	1		425.81	199.12	355.68	0	0	0	425.81	199.12	355.68	0	0	0	1.00:0.47:0.84:0:0:0	326.87	0	326.87	0	#DIV/0!	1.00:0	122605
1394	5637	| probable global transcription activator SNF2L1 isoform d | 6594 | SMARCA1 | 1070 | B7ZLQ5 | tr	NP_001269803	37.96	1	1	1		425.81	199.12	355.68	0	0	0	425.81	199.12	355.68	0	0	0	1.00:0.47:0.84:0:0:0	326.87	0	326.87	0	#DIV/0!	1.00:0	124327
1394	5692	| probable global transcription activator SNF2L1 isoform X4 | 6594 | SMARCA1 | 1036 | nan | nan	XP_016885240	37.96	1	1	1		425.81	199.12	355.68	0	0	0	425.81	199.12	355.68	0	0	0	1.00:0.47:0.84:0:0:0	326.87	0	326.87	0	#DIV/0!	1.00:0	120488
1394	5693	| probable global transcription activator SNF2L1 isoform X3 | 6594 | SMARCA1 | 1042 | P28370 | sp	XP_016885239	37.96	1	1	1		425.81	199.12	355.68	0	0	0	425.81	199.12	355.68	0	0	0	1.00:0.47:0.84:0:0:0	326.87	0	326.87	0	#DIV/0!	1.00:0	121142
1394	5694	| probable global transcription activator SNF2L1 isoform X3 | 6594 | SMARCA1 | 1042 | P28370 | sp	XP_006724845	37.96	1	1	1		425.81	199.12	355.68	0	0	0	425.81	199.12	355.68	0	0	0	1.00:0.47:0.84:0:0:0	326.87	0	326.87	0	#DIV/0!	1.00:0	121142
1394	5696	| probable global transcription activator SNF2L1 isoform c | 6594 | SMARCA1 | 1058 | P28370 | sp	NP_001269804	37.96	1	1	1		425.81	199.12	355.68	0	0	0	425.81	199.12	355.68	0	0	0	1.00:0.47:0.84:0:0:0	326.87	0	326.87	0	#DIV/0!	1.00:0	122864
1498	12205	| WASH complex subunit 5 isoform 2 | 9897 | WASHC5 | 1011 | E7EQI7 | tr	NP_001317538	37.95	3	2	2	Carbamidomethylation	391.11	412.09	732.13	0	0	0	391.11	412.09	732.13	0	0	0	1.00:1.05:1.87:0:0:0	726.95	0	726.95	0	#DIV/0!	1.00:0	117066
1498	12206	| WASH complex subunit 5 isoform X2 | 9897 | WASHC5 | 1095 | nan | nan	XP_011515711	37.95	3	2	2	Carbamidomethylation	391.11	412.09	732.13	0	0	0	391.11	412.09	732.13	0	0	0	1.00:1.05:1.87:0:0:0	726.95	0	726.95	0	#DIV/0!	1.00:0	127089
1498	12207	| WASH complex subunit 5 isoform X1 | 9897 | WASHC5 | 1159 | Q12768 | sp	XP_016869602	37.95	3	2	2	Carbamidomethylation	391.11	412.09	732.13	0	0	0	391.11	412.09	732.13	0	0	0	1.00:1.05:1.87:0:0:0	726.95	0	726.95	0	#DIV/0!	1.00:0	134286
1498	12208	| WASH complex subunit 5 isoform 1 | 9897 | WASHC5 | 1159 | Q12768 | sp	NP_055661	37.95	3	2	2	Carbamidomethylation	391.11	412.09	732.13	0	0	0	391.11	412.09	732.13	0	0	0	1.00:1.05:1.87:0:0:0	726.95	0	726.95	0	#DIV/0!	1.00:0	134286
681	7313	| reticulon-4 isoform B | 57142 | RTN4 | 373 | Q9NQC3 | sp	NP_722550	37.94	4	1	1		547.13	630.51	1015.5	0	0	0	547.13	630.51	1015.5	0	0	0	1.00:1.15:1.86:0:0:0	731.05	0	731.05	0	#DIV/0!	1.00:0	40318
1467	12156	| ras-related protein Rab-5A isoform 2 | 5868 | RAB5A | 201 | P20339 | sp	NP_001278977	37.89	7	1	1		240.79	253.17	487.89	0	0	0	240.79	253.17	487.89	0	0	0	1.00:1.05:2.03:0:0:0	327.28	0	327.28	0	#DIV/0!	1.00:0	22178
1467	12162	| ras-related protein Rab-5A isoform 1 | 5868 | RAB5A | 215 | P20339 | sp	NP_004153	37.89	7	1	1		240.79	253.17	487.89	0	0	0	240.79	253.17	487.89	0	0	0	1.00:1.05:2.03:0:0:0	327.28	0	327.28	0	#DIV/0!	1.00:0	23659
1689	13757	| centrosomal protein of 44 kDa isoform b | 80817 | CEP44 | 399 | Q9C0F1 | sp	NP_001138786	37.86	10	3	3		1283.4	754.56	1260.9	0	0	0	1283.4	754.56	1260.9	0	0	0	1.00:0.59:0.98:0:0:0	1203.6	0	1203.6	0	#DIV/0!	1.00:0	44762
1689	13758	| centrosomal protein of 44 kDa isoform X1 | 80817 | CEP44 | 399 | nan | nan	XP_024309999	37.86	10	3	3		1283.4	754.56	1260.9	0	0	0	1283.4	754.56	1260.9	0	0	0	1.00:0.59:0.98:0:0:0	1203.6	0	1203.6	0	#DIV/0!	1.00:0	44762
1689	13759	| centrosomal protein of 44 kDa isoform X1 | 80817 | CEP44 | 399 | nan | nan	XP_024309998	37.86	10	3	3		1283.4	754.56	1260.9	0	0	0	1283.4	754.56	1260.9	0	0	0	1.00:0.59:0.98:0:0:0	1203.6	0	1203.6	0	#DIV/0!	1.00:0	44762
1689	13760	| centrosomal protein of 44 kDa isoform X1 | 80817 | CEP44 | 399 | Q9C0F1 | sp	XP_011530589	37.86	10	3	3		1283.4	754.56	1260.9	0	0	0	1283.4	754.56	1260.9	0	0	0	1.00:0.59:0.98:0:0:0	1203.6	0	1203.6	0	#DIV/0!	1.00:0	44762
1689	13761	| centrosomal protein of 44 kDa isoform X1 | 80817 | CEP44 | 399 | Q9C0F1 | sp	XP_011530587	37.86	10	3	3		1283.4	754.56	1260.9	0	0	0	1283.4	754.56	1260.9	0	0	0	1.00:0.59:0.98:0:0:0	1203.6	0	1203.6	0	#DIV/0!	1.00:0	44762
1689	13762	| centrosomal protein of 44 kDa isoform X1 | 80817 | CEP44 | 399 | Q9C0F1 | sp	XP_011530588	37.86	10	3	3		1283.4	754.56	1260.9	0	0	0	1283.4	754.56	1260.9	0	0	0	1.00:0.59:0.98:0:0:0	1203.6	0	1203.6	0	#DIV/0!	1.00:0	44762
1689	13763	| centrosomal protein of 44 kDa isoform X1 | 80817 | CEP44 | 399 | nan | nan	XP_024309997	37.86	10	3	3		1283.4	754.56	1260.9	0	0	0	1283.4	754.56	1260.9	0	0	0	1.00:0.59:0.98:0:0:0	1203.6	0	1203.6	0	#DIV/0!	1.00:0	44762
1689	13952	| centrosomal protein of 44 kDa isoform X3 | 80817 | CEP44 | 363 | nan | nan	XP_016864146	37.86	11	3	3		1283.4	754.56	1260.9	0	0	0	1283.4	754.56	1260.9	0	0	0	1.00:0.59:0.98:0:0:0	1203.6	0	1203.6	0	#DIV/0!	1.00:0	40814
1689	13953	| centrosomal protein of 44 kDa isoform X3 | 80817 | CEP44 | 363 | nan | nan	XP_024310002	37.86	11	3	3		1283.4	754.56	1260.9	0	0	0	1283.4	754.56	1260.9	0	0	0	1.00:0.59:0.98:0:0:0	1203.6	0	1203.6	0	#DIV/0!	1.00:0	40814
1689	13954	| centrosomal protein of 44 kDa isoform X3 | 80817 | CEP44 | 363 | nan | nan	XP_016864145	37.86	11	3	3		1283.4	754.56	1260.9	0	0	0	1283.4	754.56	1260.9	0	0	0	1.00:0.59:0.98:0:0:0	1203.6	0	1203.6	0	#DIV/0!	1.00:0	40814
1689	13955	| centrosomal protein of 44 kDa isoform X3 | 80817 | CEP44 | 363 | nan | nan	XP_024310003	37.86	11	3	3		1283.4	754.56	1260.9	0	0	0	1283.4	754.56	1260.9	0	0	0	1.00:0.59:0.98:0:0:0	1203.6	0	1203.6	0	#DIV/0!	1.00:0	40814
1689	13956	| centrosomal protein of 44 kDa isoform X2 | 80817 | CEP44 | 390 | nan | nan	XP_024310000	37.86	10	3	3		1283.4	754.56	1260.9	0	0	0	1283.4	754.56	1260.9	0	0	0	1.00:0.59:0.98:0:0:0	1203.6	0	1203.6	0	#DIV/0!	1.00:0	44140
1689	13957	| centrosomal protein of 44 kDa isoform X2 | 80817 | CEP44 | 390 | Q9C0F1 | sp	XP_016864143	37.86	10	3	3		1283.4	754.56	1260.9	0	0	0	1283.4	754.56	1260.9	0	0	0	1.00:0.59:0.98:0:0:0	1203.6	0	1203.6	0	#DIV/0!	1.00:0	44140
1689	13958	| centrosomal protein of 44 kDa isoform a | 80817 | CEP44 | 390 | Q9C0F1 | sp	NP_001035247	37.86	10	3	3		1283.4	754.56	1260.9	0	0	0	1283.4	754.56	1260.9	0	0	0	1.00:0.59:0.98:0:0:0	1203.6	0	1203.6	0	#DIV/0!	1.00:0	44140
1689	13959	| centrosomal protein of 44 kDa isoform X2 | 80817 | CEP44 | 390 | Q9C0F1 | sp	XP_016864144	37.86	10	3	3		1283.4	754.56	1260.9	0	0	0	1283.4	754.56	1260.9	0	0	0	1.00:0.59:0.98:0:0:0	1203.6	0	1203.6	0	#DIV/0!	1.00:0	44140
1689	13960	| centrosomal protein of 44 kDa isoform X2 | 80817 | CEP44 | 390 | nan | nan	XP_024310001	37.86	10	3	3		1283.4	754.56	1260.9	0	0	0	1283.4	754.56	1260.9	0	0	0	1.00:0.59:0.98:0:0:0	1203.6	0	1203.6	0	#DIV/0!	1.00:0	44140
1689	14212	| centrosomal protein of 44 kDa isoform X4 | 80817 | CEP44 | 257 | nan | nan	XP_024310004	37.86	15	3	3		1283.4	754.56	1260.9	0	0	0	1283.4	754.56	1260.9	0	0	0	1.00:0.59:0.98:0:0:0	1203.6	0	1203.6	0	#DIV/0!	1.00:0	28762
1770	17149	| something about silencing protein 10 | 57050 | UTP3 | 479 | Q9NQZ2 | sp	NP_065101	37.84	7	2	2		850.94	314.52	911.48	0	0	0	850.94	314.52	911.48	0	0	0	1.00:0.37:1.07:0:0:0	784.5	0	784.5	0	#DIV/0!	1.00:0	54558
1372	9060	| septin-9 isoform a | 10801 | SEPT9 | 586 | Q9UHD8 | sp	NP_001106963	37.84	4	2	2		672.11	524.73	993.08	0	0	0	672.11	524.73	993.08	0	0	0	1.00:0.78:1.48:0:0:0	1042.6	0	1042.6	0	#DIV/0!	1.00:0	65402
1372	9384	| septin-9 isoform g | 10801 | SEPT9 | 567 | Q9UHD8 | sp	NP_001280624	37.84	4	2	2		672.11	524.73	993.08	0	0	0	672.11	524.73	993.08	0	0	0	1.00:0.78:1.48:0:0:0	1042.6	0	1042.6	0	#DIV/0!	1.00:0	63503
1372	9385	| septin-9 isoform c | 10801 | SEPT9 | 568 | Q9UHD8 | sp	NP_006631	37.84	4	2	2		672.11	524.73	993.08	0	0	0	672.11	524.73	993.08	0	0	0	1.00:0.78:1.48:0:0:0	1042.6	0	1042.6	0	#DIV/0!	1.00:0	63666
1372	9386	| septin-9 isoform b | 10801 | SEPT9 | 579 | Q9UHD8 | sp	NP_001106965	37.84	4	2	2		672.11	524.73	993.08	0	0	0	672.11	524.73	993.08	0	0	0	1.00:0.78:1.48:0:0:0	1042.6	0	1042.6	0	#DIV/0!	1.00:0	64682
1398	9039	| transport and Golgi organization protein 6 homolog | 79613 | TANGO6 | 1094 | Q9C0B7 | sp	NP_078838	37.83	6	4	4	Carbamidomethylation	549.1	833.62	1250.8	0	0	0	549.1	627.87	1012.3	0	0	0	1.00:1.14:1.84:0:0:0	1142.2	0	920.09	0	#DIV/0!	1.00:0	120747
1678	11255	| adenylosuccinate lyase isoform X6 | 158 | ADSL | 410 | nan | nan	XP_024307934	37.81	6	2	2	Carbamidomethylation	769.48	760.43	434.26	0	0	0	769.48	760.43	434.26	0	0	0	1.00:0.99:0.56:0:0:0	762.12	0	762.12	0	#DIV/0!	1.00:0	46626
1678	11256	| adenylosuccinate lyase isoform b | 158 | ADSL | 425 | P30566 | sp	NP_001116850	37.81	6	2	2	Carbamidomethylation	769.48	760.43	434.26	0	0	0	769.48	760.43	434.26	0	0	0	1.00:0.99:0.56:0:0:0	762.12	0	762.12	0	#DIV/0!	1.00:0	48328
1678	11257	| adenylosuccinate lyase isoform X5 | 158 | ADSL | 467 | nan | nan	XP_011528282	37.81	5	2	2	Carbamidomethylation	769.48	760.43	434.26	0	0	0	769.48	760.43	434.26	0	0	0	1.00:0.99:0.56:0:0:0	762.12	0	762.12	0	#DIV/0!	1.00:0	52811
1678	11258	| adenylosuccinate lyase isoform X4 | 158 | ADSL | 469 | nan | nan	XP_016884126	37.81	5	2	2	Carbamidomethylation	769.48	760.43	434.26	0	0	0	769.48	760.43	434.26	0	0	0	1.00:0.99:0.56:0:0:0	762.12	0	762.12	0	#DIV/0!	1.00:0	53187
1678	11259	| adenylosuccinate lyase isoform X3 | 158 | ADSL | 480 | A0A1B0GWJ0 | tr	XP_011528281	37.81	5	2	2	Carbamidomethylation	769.48	760.43	434.26	0	0	0	769.48	760.43	434.26	0	0	0	1.00:0.99:0.56:0:0:0	762.12	0	762.12	0	#DIV/0!	1.00:0	54466
1678	11260	| adenylosuccinate lyase isoform a | 158 | ADSL | 484 | P30566 | sp	NP_000017	37.81	5	2	2	Carbamidomethylation	769.48	760.43	434.26	0	0	0	769.48	760.43	434.26	0	0	0	1.00:0.99:0.56:0:0:0	762.12	0	762.12	0	#DIV/0!	1.00:0	54889
1678	11261	| adenylosuccinate lyase isoform X2 | 158 | ADSL | 511 | nan | nan	XP_016884125	37.81	5	2	2	Carbamidomethylation	769.48	760.43	434.26	0	0	0	769.48	760.43	434.26	0	0	0	1.00:0.99:0.56:0:0:0	762.12	0	762.12	0	#DIV/0!	1.00:0	57670
1678	11262	| adenylosuccinate lyase isoform X1 | 158 | ADSL | 526 | nan | nan	XP_011528279	37.81	5	2	2	Carbamidomethylation	769.48	760.43	434.26	0	0	0	769.48	760.43	434.26	0	0	0	1.00:0.99:0.56:0:0:0	762.12	0	762.12	0	#DIV/0!	1.00:0	59372
1675	13093	| R3H domain-containing protein 1 isoform X16 | 23518 | R3HDM1 | 1001 | nan | nan	XP_016859213	37.74	3	2	2		773.45	671.26	413.42	0	0	0	773.45	671.26	413.42	0	0	0	1.00:0.87:0.53:0:0:0	711.92	0	711.92	0	#DIV/0!	1.00:0	110909
1675	13113	| R3H domain-containing protein 1 isoform X15 | 23518 | R3HDM1 | 1014 | nan | nan	XP_005263686	37.74	3	2	2		773.45	671.26	413.42	0	0	0	773.45	671.26	413.42	0	0	0	1.00:0.87:0.53:0:0:0	711.92	0	711.92	0	#DIV/0!	1.00:0	112353
1675	13114	| R3H domain-containing protein 1 isoform X14 | 23518 | R3HDM1 | 1015 | nan | nan	XP_005263685	37.74	3	2	2		773.45	671.26	413.42	0	0	0	773.45	671.26	413.42	0	0	0	1.00:0.87:0.53:0:0:0	711.92	0	711.92	0	#DIV/0!	1.00:0	112481
1675	13115	| R3H domain-containing protein 1 isoform X12 | 23518 | R3HDM1 | 1037 | nan | nan	XP_005263684	37.74	3	2	2		773.45	671.26	413.42	0	0	0	773.45	671.26	413.42	0	0	0	1.00:0.87:0.53:0:0:0	711.92	0	711.92	0	#DIV/0!	1.00:0	114534
1675	13116	| R3H domain-containing protein 1 isoform X11 | 23518 | R3HDM1 | 1038 | nan | nan	XP_005263683	37.74	3	2	2		773.45	671.26	413.42	0	0	0	773.45	671.26	413.42	0	0	0	1.00:0.87:0.53:0:0:0	711.92	0	711.92	0	#DIV/0!	1.00:0	114662
1675	13117	| R3H domain-containing protein 1 isoform X10 | 23518 | R3HDM1 | 1049 | nan | nan	XP_011509180	37.74	3	2	2		773.45	671.26	413.42	0	0	0	773.45	671.26	413.42	0	0	0	1.00:0.87:0.53:0:0:0	711.92	0	711.92	0	#DIV/0!	1.00:0	116178
1675	13118	| R3H domain-containing protein 1 isoform X8 | 23518 | R3HDM1 | 1056 | nan | nan	XP_016859212	37.74	3	2	2		773.45	671.26	413.42	0	0	0	773.45	671.26	413.42	0	0	0	1.00:0.87:0.53:0:0:0	711.92	0	711.92	0	#DIV/0!	1.00:0	116049
1675	13119	| R3H domain-containing protein 1 isoform X8 | 23518 | R3HDM1 | 1056 | nan | nan	XP_016859211	37.74	3	2	2		773.45	671.26	413.42	0	0	0	773.45	671.26	413.42	0	0	0	1.00:0.87:0.53:0:0:0	711.92	0	711.92	0	#DIV/0!	1.00:0	116049
1675	13314	| R3H domain-containing protein 1 isoform X24 | 23518 | R3HDM1 | 847 | nan | nan	XP_016859225	37.74	3	2	2		773.45	671.26	413.42	0	0	0	773.45	671.26	413.42	0	0	0	1.00:0.87:0.53:0:0:0	711.92	0	711.92	0	#DIV/0!	1.00:0	93305
1675	13315	| R3H domain-containing protein 1 isoform X22 | 23518 | R3HDM1 | 964 | nan | nan	XP_016859221	37.74	3	2	2		773.45	671.26	413.42	0	0	0	773.45	671.26	413.42	0	0	0	1.00:0.87:0.53:0:0:0	711.92	0	711.92	0	#DIV/0!	1.00:0	105356
1675	13316	| R3H domain-containing protein 1 isoform X21 | 23518 | R3HDM1 | 965 | nan | nan	XP_016859220	37.74	3	2	2		773.45	671.26	413.42	0	0	0	773.45	671.26	413.42	0	0	0	1.00:0.87:0.53:0:0:0	711.92	0	711.92	0	#DIV/0!	1.00:0	105484
1675	13317	| R3H domain-containing protein 1 isoform X20 | 23518 | R3HDM1 | 966 | nan | nan	XP_016859218	37.74	3	2	2		773.45	671.26	413.42	0	0	0	773.45	671.26	413.42	0	0	0	1.00:0.87:0.53:0:0:0	711.92	0	711.92	0	#DIV/0!	1.00:0	105346
1675	13318	| R3H domain-containing protein 1 isoform X20 | 23518 | R3HDM1 | 966 | nan | nan	XP_016859219	37.74	3	2	2		773.45	671.26	413.42	0	0	0	773.45	671.26	413.42	0	0	0	1.00:0.87:0.53:0:0:0	711.92	0	711.92	0	#DIV/0!	1.00:0	105346
1675	13319	| R3H domain-containing protein 1 isoform X17 | 23518 | R3HDM1 | 999 | nan | nan	XP_016859214	37.74	3	2	2		773.45	671.26	413.42	0	0	0	773.45	671.26	413.42	0	0	0	1.00:0.87:0.53:0:0:0	711.92	0	711.92	0	#DIV/0!	1.00:0	109181
1675	13320	| R3H domain-containing protein 1 isoform X17 | 23518 | R3HDM1 | 999 | nan | nan	XP_016859215	37.74	3	2	2		773.45	671.26	413.42	0	0	0	773.45	671.26	413.42	0	0	0	1.00:0.87:0.53:0:0:0	711.92	0	711.92	0	#DIV/0!	1.00:0	109181
1675	13321	| R3H domain-containing protein 1 isoform X17 | 23518 | R3HDM1 | 999 | nan | nan	XP_016859216	37.74	3	2	2		773.45	671.26	413.42	0	0	0	773.45	671.26	413.42	0	0	0	1.00:0.87:0.53:0:0:0	711.92	0	711.92	0	#DIV/0!	1.00:0	109181
1675	13344	| R3H domain-containing protein 1 isoform X18 | 23518 | R3HDM1 | 999 | nan | nan	XP_016859217	37.74	3	2	2		773.45	671.26	413.42	0	0	0	773.45	671.26	413.42	0	0	0	1.00:0.87:0.53:0:0:0	711.92	0	711.92	0	#DIV/0!	1.00:0	110932
1675	13345	| R3H domain-containing protein 1 isoform X13 | 23518 | R3HDM1 | 1033 | nan | nan	XP_011509181	37.74	3	2	2		773.45	671.26	413.42	0	0	0	773.45	671.26	413.42	0	0	0	1.00:0.87:0.53:0:0:0	711.92	0	711.92	0	#DIV/0!	1.00:0	114629
1355	9424	| tRNA (guanine-N(7)-)-methyltransferase non-catalytic subunit WDR4 | 10785 | WDR4 | 411 | P57081 | sp	NP_001247403	37.74	16	4	4	Carbamidomethylation; Acetylation (Protein N-term)	933.12	950.69	1985.1	0	0	0	933.12	950.69	1575.5	0	0	0	1.00:1.02:1.69:0:0:0	1838.4	0	1428.8	0	#DIV/0!	1.00:0	45362
1355	9425	| tRNA (guanine-N(7)-)-methyltransferase non-catalytic subunit WDR4 | 10785 | WDR4 | 412 | P57081 | sp	NP_387510	37.74	16	4	4	Carbamidomethylation; Acetylation (Protein N-term)	933.12	950.69	1985.1	0	0	0	933.12	950.69	1575.5	0	0	0	1.00:1.02:1.69:0:0:0	1838.4	0	1428.8	0	#DIV/0!	1.00:0	45490
1355	9426	| tRNA (guanine-N(7)-)-methyltransferase non-catalytic subunit WDR4 | 10785 | WDR4 | 412 | P57081 | sp	NP_061139	37.74	16	4	4	Carbamidomethylation; Acetylation (Protein N-term)	933.12	950.69	1985.1	0	0	0	933.12	950.69	1575.5	0	0	0	1.00:1.02:1.69:0:0:0	1838.4	0	1428.8	0	#DIV/0!	1.00:0	45490
280	1897	| eukaryotic translation initiation factor 3 subunit E | 3646 | EIF3E | 445 | P60228 | sp	NP_001559	37.74	39	14	14	Carbamidomethylation	8687.8	7940.7	7611.6	963.02	850.33	1007.3	2478.8	2811.5	2355.4	963.02	850.33	1007.3	1.00:1.13:0.95:0.39:0.34:0.41	8404.2	1137.2	2548.6	1137.2	2.24112	1.00:0.45	52221
144	1059	| host cell factor 1 isoform X2 | 3054 | HCFC1 | 2079 | P51610 | sp	XP_006724879	37.68	1	1	1		325.26	163.69	343	0	0	0	325.26	163.69	343	0	0	0	1.00:0.50:1.05:0:0:0	277.32	0	277.32	0	#DIV/0!	1.00:0	213403
144	1060	| host cell factor 1 isoform X1 | 3054 | HCFC1 | 2080 | A6NEM2 | tr	XP_006724878	37.68	1	1	1		325.26	163.69	343	0	0	0	325.26	163.69	343	0	0	0	1.00:0.50:1.05:0:0:0	277.32	0	277.32	0	#DIV/0!	1.00:0	213474
1491	14294	| NADH dehydrogenase subunit 5 (mitochondrion) | 4540 | ND5 | 603 | P03915 | sp	YP_003024036	37.68	5	2	2		1380.9	838.55	1407.7	0	0	0	1380.9	838.55	1407.7	0	0	0	1.00:0.61:1.02:0:0:0	1209.1	0	1209.1	0	#DIV/0!	1.00:0	67027
2113	16679	| acyl-CoA-binding domain-containing protein 5 isoform 16 | 91452 | ACBD5 | 466 | nan | nan	NP_001339515	37.67	2	1	1		470.74	329.3	653.81	0	0	0	470.74	329.3	653.81	0	0	0	1.00:0.70:1.39:0:0:0	484.62	0	484.62	0	#DIV/0!	1.00:0	52596
2113	16680	| acyl-CoA-binding domain-containing protein 5 isoform 13 | 91452 | ACBD5 | 468 | nan | nan	NP_001339510	37.67	2	1	1		470.74	329.3	653.81	0	0	0	470.74	329.3	653.81	0	0	0	1.00:0.70:1.39:0:0:0	484.62	0	484.62	0	#DIV/0!	1.00:0	52781
2113	16681	| acyl-CoA-binding domain-containing protein 5 isoform X13 | 91452 | ACBD5 | 477 | nan | nan	XP_024304016	37.67	2	1	1		470.74	329.3	653.81	0	0	0	470.74	329.3	653.81	0	0	0	1.00:0.70:1.39:0:0:0	484.62	0	484.62	0	#DIV/0!	1.00:0	53760
2113	22734	| acyl-CoA-binding domain-containing protein 5 isoform X17 | 91452 | ACBD5 | 427 | nan | nan	XP_016872391	37.67	3	1	1		470.74	329.3	653.81	0	0	0	470.74	329.3	653.81	0	0	0	1.00:0.70:1.39:0:0:0	484.62	0	484.62	0	#DIV/0!	1.00:0	47568
2113	22735	| acyl-CoA-binding domain-containing protein 5 isoform 15 | 91452 | ACBD5 | 427 | nan | nan	NP_001339514	37.67	3	1	1		470.74	329.3	653.81	0	0	0	470.74	329.3	653.81	0	0	0	1.00:0.70:1.39:0:0:0	484.62	0	484.62	0	#DIV/0!	1.00:0	47568
2113	22736	| acyl-CoA-binding domain-containing protein 5 isoform X16 | 91452 | ACBD5 | 436 | nan | nan	XP_016872389	37.67	3	1	1		470.74	329.3	653.81	0	0	0	470.74	329.3	653.81	0	0	0	1.00:0.70:1.39:0:0:0	484.62	0	484.62	0	#DIV/0!	1.00:0	48547
2113	22737	| acyl-CoA-binding domain-containing protein 5 isoform X16 | 91452 | ACBD5 | 436 | nan | nan	XP_016872390	37.67	3	1	1		470.74	329.3	653.81	0	0	0	470.74	329.3	653.81	0	0	0	1.00:0.70:1.39:0:0:0	484.62	0	484.62	0	#DIV/0!	1.00:0	48547
2113	23517	| acyl-CoA-binding domain-containing protein 5 isoform 14 | 91452 | ACBD5 | 422 | nan | nan	NP_001339511	37.67	3	1	1		470.74	329.3	653.81	0	0	0	470.74	329.3	653.81	0	0	0	1.00:0.70:1.39:0:0:0	484.62	0	484.62	0	#DIV/0!	1.00:0	47289
2113	23519	| acyl-CoA-binding domain-containing protein 5 isoform 17 | 91452 | ACBD5 | 455 | nan | nan	NP_001339516	37.67	2	1	1		470.74	329.3	653.81	0	0	0	470.74	329.3	653.81	0	0	0	1.00:0.70:1.39:0:0:0	484.62	0	484.62	0	#DIV/0!	1.00:0	51296
2113	23520	| acyl-CoA-binding domain-containing protein 5 isoform 18 | 91452 | ACBD5 | 457 | nan | nan	NP_001339517	37.67	2	1	1		470.74	329.3	653.81	0	0	0	470.74	329.3	653.81	0	0	0	1.00:0.70:1.39:0:0:0	484.62	0	484.62	0	#DIV/0!	1.00:0	51481
2113	23521	| acyl-CoA-binding domain-containing protein 5 isoform X15 | 91452 | ACBD5 | 464 | nan | nan	XP_024304017	37.67	2	1	1		470.74	329.3	653.81	0	0	0	470.74	329.3	653.81	0	0	0	1.00:0.70:1.39:0:0:0	484.62	0	484.62	0	#DIV/0!	1.00:0	52060
2113	23522	| acyl-CoA-binding domain-containing protein 5 isoform X14 | 91452 | ACBD5 | 466 | nan | nan	XP_016872387	37.67	2	1	1		470.74	329.3	653.81	0	0	0	470.74	329.3	653.81	0	0	0	1.00:0.70:1.39:0:0:0	484.62	0	484.62	0	#DIV/0!	1.00:0	52460
2113	23523	| acyl-CoA-binding domain-containing protein 5 isoform 12 | 91452 | ACBD5 | 472 | nan | nan	NP_001339509	37.67	2	1	1		470.74	329.3	653.81	0	0	0	470.74	329.3	653.81	0	0	0	1.00:0.70:1.39:0:0:0	484.62	0	484.62	0	#DIV/0!	1.00:0	52975
2113	23528	| acyl-CoA-binding domain-containing protein 5 isoform 2 | 91452 | ACBD5 | 490 | nan | nan	NP_001339506	37.67	2	1	1		470.74	329.3	653.81	0	0	0	470.74	329.3	653.81	0	0	0	1.00:0.70:1.39:0:0:0	484.62	0	484.62	0	#DIV/0!	1.00:0	54786
2113	23529	| acyl-CoA-binding domain-containing protein 5 isoform 2 | 91452 | ACBD5 | 490 | nan | nan	NP_001339508	37.67	2	1	1		470.74	329.3	653.81	0	0	0	470.74	329.3	653.81	0	0	0	1.00:0.70:1.39:0:0:0	484.62	0	484.62	0	#DIV/0!	1.00:0	54786
2113	23530	| acyl-CoA-binding domain-containing protein 5 isoform 2 | 91452 | ACBD5 | 490 | nan | nan	NP_001339507	37.67	2	1	1		470.74	329.3	653.81	0	0	0	470.74	329.3	653.81	0	0	0	1.00:0.70:1.39:0:0:0	484.62	0	484.62	0	#DIV/0!	1.00:0	54786
2113	27996	| acyl-CoA-binding domain-containing protein 5 isoform 4 | 91452 | ACBD5 | 416 | nan | nan	NP_001339513	37.67	3	1	1		470.74	329.3	653.81	0	0	0	470.74	329.3	653.81	0	0	0	1.00:0.70:1.39:0:0:0	484.62	0	484.62	0	#DIV/0!	1.00:0	46268
2113	27997	| acyl-CoA-binding domain-containing protein 5 isoform 4 | 91452 | ACBD5 | 416 | nan | nan	NP_001339512	37.67	3	1	1		470.74	329.3	653.81	0	0	0	470.74	329.3	653.81	0	0	0	1.00:0.70:1.39:0:0:0	484.62	0	484.62	0	#DIV/0!	1.00:0	46268
2113	27998	| acyl-CoA-binding domain-containing protein 5 isoform X18 | 91452 | ACBD5 | 425 | nan | nan	XP_016872394	37.67	3	1	1		470.74	329.3	653.81	0	0	0	470.74	329.3	653.81	0	0	0	1.00:0.70:1.39:0:0:0	484.62	0	484.62	0	#DIV/0!	1.00:0	47247
2113	27999	| acyl-CoA-binding domain-containing protein 5 isoform X18 | 91452 | ACBD5 | 425 | nan | nan	XP_016872393	37.67	3	1	1		470.74	329.3	653.81	0	0	0	470.74	329.3	653.81	0	0	0	1.00:0.70:1.39:0:0:0	484.62	0	484.62	0	#DIV/0!	1.00:0	47247
1215	10367	| caspase activity and apoptosis inhibitor 1 isoform 1 | 79886 | CAAP1 | 361 | Q9H8G2 | sp	NP_079104	37.67	14	4	4	Carbamidomethylation	3415	1990.1	3833.5	0	0	0	2918.7	1990.1	3306.7	0	0	0	1.00:0.68:1.13:0:0:0	3250	0	2738.5	0	#DIV/0!	1.00:0	38368
1699	10604	| RNA exonuclease 4 isoform 1 | 57109 | REXO4 | 422 | Q9GZR2 | sp	NP_065118	37.66	11	3	3	Carbamidomethylation	777.24	690.63	1233.5	0	0	0	777.24	690.63	1233.5	0	0	0	1.00:0.89:1.59:0:0:0	1381.9	0	1381.9	0	#DIV/0!	1.00:0	46672
1730	11873	| integrator complex subunit 13 isoform X4 | 55726 | INTS13 | 681 | nan | nan	XP_016875123	37.64	4	2	2		391.87	384.06	700.38	0	0	0	391.87	384.06	700.38	0	0	0	1.00:0.98:1.79:0:0:0	671.7	0	671.7	0	#DIV/0!	1.00:0	77412
1730	11874	| integrator complex subunit 13 isoform X3 | 55726 | INTS13 | 687 | nan | nan	XP_016875122	37.64	3	2	2		391.87	384.06	700.38	0	0	0	391.87	384.06	700.38	0	0	0	1.00:0.98:1.79:0:0:0	671.7	0	671.7	0	#DIV/0!	1.00:0	78033
1730	11875	| integrator complex subunit 13 | 55726 | INTS13 | 706 | Q9NVM9 | sp	NP_060634	37.64	3	2	2		391.87	384.06	700.38	0	0	0	391.87	384.06	700.38	0	0	0	1.00:0.98:1.79:0:0:0	671.7	0	671.7	0	#DIV/0!	1.00:0	80225
1730	11876	| integrator complex subunit 13 isoform X2 | 55726 | INTS13 | 706 | Q9NVM9 | sp	XP_016875121	37.64	3	2	2		391.87	384.06	700.38	0	0	0	391.87	384.06	700.38	0	0	0	1.00:0.98:1.79:0:0:0	671.7	0	671.7	0	#DIV/0!	1.00:0	80225
1730	11877	| integrator complex subunit 13 isoform X1 | 55726 | INTS13 | 712 | nan | nan	XP_011519052	37.64	3	2	2		391.87	384.06	700.38	0	0	0	391.87	384.06	700.38	0	0	0	1.00:0.98:1.79:0:0:0	671.7	0	671.7	0	#DIV/0!	1.00:0	80846
1730	11968	| integrator complex subunit 13 isoform X9 | 55726 | INTS13 | 624 | nan | nan	XP_024304823	37.64	4	2	2		391.87	384.06	700.38	0	0	0	391.87	384.06	700.38	0	0	0	1.00:0.98:1.79:0:0:0	671.7	0	671.7	0	#DIV/0!	1.00:0	70555
1730	11969	| integrator complex subunit 13 isoform X8 | 55726 | INTS13 | 631 | nan | nan	XP_016875125	37.64	4	2	2		391.87	384.06	700.38	0	0	0	391.87	384.06	700.38	0	0	0	1.00:0.98:1.79:0:0:0	671.7	0	671.7	0	#DIV/0!	1.00:0	71924
1730	11970	| integrator complex subunit 13 isoform X7 | 55726 | INTS13 | 637 | nan | nan	XP_011519054	37.64	4	2	2		391.87	384.06	700.38	0	0	0	391.87	384.06	700.38	0	0	0	1.00:0.98:1.79:0:0:0	671.7	0	671.7	0	#DIV/0!	1.00:0	72544
1730	11971	| integrator complex subunit 13 isoform X6 | 55726 | INTS13 | 649 | nan | nan	XP_005253479	37.64	4	2	2		391.87	384.06	700.38	0	0	0	391.87	384.06	700.38	0	0	0	1.00:0.98:1.79:0:0:0	671.7	0	671.7	0	#DIV/0!	1.00:0	73368
1730	11972	| integrator complex subunit 13 isoform X6 | 55726 | INTS13 | 649 | nan | nan	XP_016875124	37.64	4	2	2		391.87	384.06	700.38	0	0	0	391.87	384.06	700.38	0	0	0	1.00:0.98:1.79:0:0:0	671.7	0	671.7	0	#DIV/0!	1.00:0	73368
1730	11973	| integrator complex subunit 13 isoform X5 | 55726 | INTS13 | 655 | nan | nan	XP_011519053	37.64	4	2	2		391.87	384.06	700.38	0	0	0	391.87	384.06	700.38	0	0	0	1.00:0.98:1.79:0:0:0	671.7	0	671.7	0	#DIV/0!	1.00:0	73989
1436	8771	| THO complex subunit 3 | 84321 | THOC3 | 351 | Q96J01 | sp	NP_115737	37.64	12	3	3	Carbamidomethylation	809.49	1070.3	1464.1	0	0	0	809.49	1070.3	1464.1	0	0	0	1.00:1.32:1.81:0:0:0	1238.9	0	1238.9	0	#DIV/0!	1.00:0	38772
1295	10171	| nucleolar MIF4G domain-containing protein 1 isoform 2 | 64434 | NOM1 | 861 | nan | nan	NP_001340295	37.64	5	3	3		1244.6	1407.1	2132.6	0	0	0	1244.6	1407.1	2132.6	0	0	0	1.00:1.13:1.71:0:0:0	1594.7	0	1594.7	0	#DIV/0!	1.00:0	96385
1295	10583	| nucleolar MIF4G domain-containing protein 1 isoform 1 | 64434 | NOM1 | 860 | Q5C9Z4 | sp	NP_612409	37.64	5	3	3		1244.6	1407.1	2132.6	0	0	0	1244.6	1407.1	2132.6	0	0	0	1.00:1.13:1.71:0:0:0	1594.7	0	1594.7	0	#DIV/0!	1.00:0	96257
1868	12915	| transcription initiation factor TFIID subunit 4 | 6874 | TAF4 | 1085 | O00268 | sp	NP_003176	37.63	1	1	1		464.37	237.34	423.14	0	0	0	464.37	237.34	423.14	0	0	0	1.00:0.51:0.91:0:0:0	374.95	0	374.95	0	#DIV/0!	1.00:0	110114
1880	10649	| extended synaptotagmin-2 | 57488 | ESYT2 | 893 | A0FGR8 | sp	NP_065779	37.62	3	2	2		361.4	396.44	681.34	0	0	0	361.4	396.44	681.34	0	0	0	1.00:1.10:1.89:0:0:0	718.25	0	718.25	0	#DIV/0!	1.00:0	98902
1501	9987	| kinesin-like protein KIFC1 isoform X3 | 3833 | KIFC1 | 633 | nan | nan	XP_016866326	37.61	8	3	3		278.76	583.79	890.11	0	0	0	278.76	583.79	890.11	0	0	0	1.00:2.09:3.19:0:0:0	876.33	0	876.33	0	#DIV/0!	1.00:0	69350
1501	9988	| kinesin-like protein KIFC1 isoform X2 | 3833 | KIFC1 | 666 | nan | nan	XP_011512887	37.61	8	3	3		278.76	583.79	890.11	0	0	0	278.76	583.79	890.11	0	0	0	1.00:2.09:3.19:0:0:0	876.33	0	876.33	0	#DIV/0!	1.00:0	73036
1501	9989	| kinesin-like protein KIFC1 | 3833 | KIFC1 | 673 | Q9BW19 | sp	NP_002254	37.61	7	3	3		278.76	583.79	890.11	0	0	0	278.76	583.79	890.11	0	0	0	1.00:2.09:3.19:0:0:0	876.33	0	876.33	0	#DIV/0!	1.00:0	73748
1501	9990	| kinesin-like protein KIFC1 isoform X1 | 3833 | KIFC1 | 674 | nan | nan	XP_016866325	37.61	7	3	3		278.76	583.79	890.11	0	0	0	278.76	583.79	890.11	0	0	0	1.00:2.09:3.19:0:0:0	876.33	0	876.33	0	#DIV/0!	1.00:0	73995
1896	12582	| cytoplasmic dynein 1 light intermediate chain 2 isoform 3 | 1783 | DYNC1LI2 | 453 | Q63HJ8 | tr	NP_001310884	37.49	6	2	2		470.76	270.3	230.63	0	0	0	470.76	270.3	230.63	0	0	0	1.00:0.57:0.49:0:0:0	509.94	0	509.94	0	#DIV/0!	1.00:0	49825
1896	12585	| cytoplasmic dynein 1 light intermediate chain 2 isoform 1 | 1783 | DYNC1LI2 | 492 | O43237 | sp	NP_006132	37.49	5	2	2		470.76	270.3	230.63	0	0	0	470.76	270.3	230.63	0	0	0	1.00:0.57:0.49:0:0:0	509.94	0	509.94	0	#DIV/0!	1.00:0	54099
720	4350	| SWI/SNF complex subunit SMARCC2 isoform X2 | 6601 | SMARCC2 | 1213 | nan | nan	XP_005269160	37.49	3	2	2		591.37	499.11	922.85	0	0	0	591.37	499.11	922.85	0	0	0	1.00:0.84:1.56:0:0:0	839.22	0	839.22	0	#DIV/0!	1.00:0	132751
720	4450	| SWI/SNF complex subunit SMARCC2 isoform X6 | 6601 | SMARCC2 | 1099 | nan | nan	XP_016875375	37.49	3	2	2		591.37	499.11	922.85	0	0	0	591.37	499.11	922.85	0	0	0	1.00:0.84:1.56:0:0:0	839.22	0	839.22	0	#DIV/0!	1.00:0	121536
720	4451	| SWI/SNF complex subunit SMARCC2 isoform X5 | 6601 | SMARCC2 | 1121 | nan | nan	XP_016875374	37.49	3	2	2		591.37	499.11	922.85	0	0	0	591.37	499.11	922.85	0	0	0	1.00:0.84:1.56:0:0:0	839.22	0	839.22	0	#DIV/0!	1.00:0	123620
720	4458	| SWI/SNF complex subunit SMARCC2 isoform a | 6601 | SMARCC2 | 1214 | Q8TAQ2 | sp	NP_003066	37.49	3	2	2		591.37	499.11	922.85	0	0	0	591.37	499.11	922.85	0	0	0	1.00:0.84:1.56:0:0:0	839.22	0	839.22	0	#DIV/0!	1.00:0	132879
720	4471	| SWI/SNF complex subunit SMARCC2 isoform X4 | 6601 | SMARCC2 | 1129 | nan | nan	XP_016875373	37.49	3	2	2		591.37	499.11	922.85	0	0	0	591.37	499.11	922.85	0	0	0	1.00:0.84:1.56:0:0:0	839.22	0	839.22	0	#DIV/0!	1.00:0	124713
720	4472	| SWI/SNF complex subunit SMARCC2 isoform b | 6601 | SMARCC2 | 1130 | Q8TAQ2 | sp	NP_620706	37.49	3	2	2		591.37	499.11	922.85	0	0	0	591.37	499.11	922.85	0	0	0	1.00:0.84:1.56:0:0:0	839.22	0	839.22	0	#DIV/0!	1.00:0	124841
720	4473	| SWI/SNF complex subunit SMARCC2 isoform X3 | 6601 | SMARCC2 | 1151 | nan | nan	XP_005269161	37.49	3	2	2		591.37	499.11	922.85	0	0	0	591.37	499.11	922.85	0	0	0	1.00:0.84:1.56:0:0:0	839.22	0	839.22	0	#DIV/0!	1.00:0	126796
720	4474	| SWI/SNF complex subunit SMARCC2 isoform c | 6601 | SMARCC2 | 1152 | Q8TAQ2 | sp	NP_001123892	37.49	3	2	2		591.37	499.11	922.85	0	0	0	591.37	499.11	922.85	0	0	0	1.00:0.84:1.56:0:0:0	839.22	0	839.22	0	#DIV/0!	1.00:0	126924
720	4475	| SWI/SNF complex subunit SMARCC2 isoform X1 | 6601 | SMARCC2 | 1244 | nan | nan	XP_005269159	37.49	3	2	2		591.37	499.11	922.85	0	0	0	591.37	499.11	922.85	0	0	0	1.00:0.84:1.56:0:0:0	839.22	0	839.22	0	#DIV/0!	1.00:0	136056
720	4476	| SWI/SNF complex subunit SMARCC2 isoform d | 6601 | SMARCC2 | 1245 | Q8TAQ2 | sp	NP_001317217	37.49	3	2	2		591.37	499.11	922.85	0	0	0	591.37	499.11	922.85	0	0	0	1.00:0.84:1.56:0:0:0	839.22	0	839.22	0	#DIV/0!	1.00:0	136184
1119	11638	| bolA-like protein 2 isoform 1 | 654483 | BOLA2B | 152 | Q9H3K6 | sp	NP_001034271	37.48	35	4	4	Carbamidomethylation	9927.7	6807	6634.2	0	0	0	9493.5	6399.5	6256.8	0	0	0	1.00:0.67:0.66:0:0:0	7789.6	0	7383.3	0	#DIV/0!	1.00:0	16932
1119	11639	| bolA-like protein 2 isoform 1 | 552900 | BOLA2 | 152 | Q9H3K6 | sp	NP_001026997	37.48	35	4	4	Carbamidomethylation	9927.7	6807	6634.2	0	0	0	9493.5	6399.5	6256.8	0	0	0	1.00:0.67:0.66:0:0:0	7789.6	0	7383.3	0	#DIV/0!	1.00:0	16932
1142	7192	| 26S proteasome regulatory subunit 4 isoform a | 5700 | PSMC1 | 440 | P62191 | sp	NP_002793	37.45	7	2	2		430.07	306.6	607.85	0	0	0	430.07	306.6	607.85	0	0	0	1.00:0.71:1.41:0:0:0	651.71	0	651.71	0	#DIV/0!	1.00:0	49185
1142	7249	| 26S proteasome regulatory subunit 4 isoform X1 | 5700 | PSMC1 | 367 | P62191 | sp	XP_016876959	37.45	9	2	2		430.07	306.6	607.85	0	0	0	430.07	306.6	607.85	0	0	0	1.00:0.71:1.41:0:0:0	651.71	0	651.71	0	#DIV/0!	1.00:0	41167
1142	7250	| 26S proteasome regulatory subunit 4 isoform b | 5700 | PSMC1 | 367 | P62191 | sp	NP_001317141	37.45	9	2	2		430.07	306.6	607.85	0	0	0	430.07	306.6	607.85	0	0	0	1.00:0.71:1.41:0:0:0	651.71	0	651.71	0	#DIV/0!	1.00:0	41167
1802	12491	| RNA-binding protein 5 isoform X3 | 10181 | RBM5 | 741 | nan | nan	XP_011531564	37.44	3	2	2		841.83	319.3	990	0	0	0	841.83	319.3	990	0	0	0	1.00:0.38:1.18:0:0:0	852.83	0	852.83	0	#DIV/0!	1.00:0	83655
1802	12505	| RNA-binding protein 5 isoform X2 | 10181 | RBM5 | 756 | nan | nan	XP_006712980	37.44	3	2	2		841.83	319.3	990	0	0	0	841.83	319.3	990	0	0	0	1.00:0.38:1.18:0:0:0	852.83	0	852.83	0	#DIV/0!	1.00:0	85864
1802	12506	| RNA-binding protein 5 isoform X1 | 10181 | RBM5 | 815 | P52756 | sp	XP_016860992	37.44	3	2	2		841.83	319.3	990	0	0	0	841.83	319.3	990	0	0	0	1.00:0.38:1.18:0:0:0	852.83	0	852.83	0	#DIV/0!	1.00:0	92154
1802	12507	| RNA-binding protein 5 | 10181 | RBM5 | 815 | P52756 | sp	NP_005769	37.44	3	2	2		841.83	319.3	990	0	0	0	841.83	319.3	990	0	0	0	1.00:0.38:1.18:0:0:0	852.83	0	852.83	0	#DIV/0!	1.00:0	92154
1802	12858	| RNA-binding protein 5 isoform X5 | 10181 | RBM5 | 682 | nan | nan	XP_016860993	37.44	4	2	2		841.83	319.3	990	0	0	0	841.83	319.3	990	0	0	0	1.00:0.38:1.18:0:0:0	852.83	0	852.83	0	#DIV/0!	1.00:0	77690
1802	12859	| RNA-binding protein 5 isoform X4 | 10181 | RBM5 | 741 | nan | nan	XP_011531563	37.44	3	2	2		841.83	319.3	990	0	0	0	841.83	319.3	990	0	0	0	1.00:0.38:1.18:0:0:0	852.83	0	852.83	0	#DIV/0!	1.00:0	83980
1170	7321	| caldesmon isoform X1 | 800 | CALD1 | 792 | nan | nan	XP_016868139	37.41	7	4	4		1342.8	1027.3	1760.2	0	0	0	1125.5	825.22	1474.4	0	0	0	1.00:0.73:1.31:0:0:0	1505.5	0	1270.4	0	#DIV/0!	1.00:0	93144
1170	7322	| caldesmon isoform 1 | 800 | CALD1 | 793 | Q05682 | sp	NP_149129	37.41	7	4	4		1342.8	1027.3	1760.2	0	0	0	1125.5	825.22	1474.4	0	0	0	1.00:0.73:1.31:0:0:0	1505.5	0	1270.4	0	#DIV/0!	1.00:0	93231
1170	7391	| caldesmon isoform 4 | 800 | CALD1 | 558 | Q05682 | sp	NP_149130	37.41	10	4	4		1342.8	1027.3	1760.2	0	0	0	1125.5	825.22	1474.4	0	0	0	1.00:0.73:1.31:0:0:0	1505.5	0	1270.4	0	#DIV/0!	1.00:0	64256
1170	7469	| caldesmon isoform 3 | 800 | CALD1 | 563 | Q05682 | sp	NP_149347	37.41	10	4	4		1342.8	1027.3	1760.2	0	0	0	1125.5	825.22	1474.4	0	0	0	1.00:0.73:1.31:0:0:0	1505.5	0	1270.4	0	#DIV/0!	1.00:0	65620
1170	7470	| caldesmon isoform X2 | 800 | CALD1 | 564 | nan | nan	XP_024302710	37.41	10	4	4		1342.8	1027.3	1760.2	0	0	0	1125.5	825.22	1474.4	0	0	0	1.00:0.73:1.31:0:0:0	1505.5	0	1270.4	0	#DIV/0!	1.00:0	65707
1170	7517	| caldesmon isoform X5 | 800 | CALD1 | 531 | nan | nan	XP_016868143	37.41	11	4	4		1342.8	1027.3	1760.2	0	0	0	1125.5	825.22	1474.4	0	0	0	1.00:0.73:1.31:0:0:0	1505.5	0	1270.4	0	#DIV/0!	1.00:0	61126
1170	7518	| caldesmon isoform 5 | 800 | CALD1 | 532 | Q05682 | sp	NP_149131	37.41	11	4	4		1342.8	1027.3	1760.2	0	0	0	1125.5	825.22	1474.4	0	0	0	1.00:0.73:1.31:0:0:0	1505.5	0	1270.4	0	#DIV/0!	1.00:0	61213
1170	7579	| caldesmon isoform X4 | 800 | CALD1 | 537 | nan | nan	XP_024302711	37.41	11	4	4		1342.8	1027.3	1760.2	0	0	0	1125.5	825.22	1474.4	0	0	0	1.00:0.73:1.31:0:0:0	1505.5	0	1270.4	0	#DIV/0!	1.00:0	62576
1170	7580	| caldesmon isoform 2 | 800 | CALD1 | 538 | Q05682 | sp	NP_004333	37.41	11	4	4		1342.8	1027.3	1760.2	0	0	0	1125.5	825.22	1474.4	0	0	0	1.00:0.73:1.31:0:0:0	1505.5	0	1270.4	0	#DIV/0!	1.00:0	62663
1170	7581	| caldesmon isoform X3 | 800 | CALD1 | 538 | Q05682 | sp	XP_016868141	37.41	11	4	4		1342.8	1027.3	1760.2	0	0	0	1125.5	825.22	1474.4	0	0	0	1.00:0.73:1.31:0:0:0	1505.5	0	1270.4	0	#DIV/0!	1.00:0	62663
1724	12758	| STE20/SPS1-related proline-alanine-rich protein kinase isoform X4 | 27347 | STK39 | 443 | nan | nan	XP_016859304	37.37	5	2	2	Carbamidomethylation	436.2	632.12	821.44	0	0	0	436.2	632.12	821.44	0	0	0	1.00:1.45:1.88:0:0:0	726.78	0	726.78	0	#DIV/0!	1.00:0	49395
1724	12759	| STE20/SPS1-related proline-alanine-rich protein kinase isoform X3 | 27347 | STK39 | 461 | nan | nan	XP_016859303	37.37	5	2	2	Carbamidomethylation	436.2	632.12	821.44	0	0	0	436.2	632.12	821.44	0	0	0	1.00:1.45:1.88:0:0:0	726.78	0	726.78	0	#DIV/0!	1.00:0	50560
1724	12761	| STE20/SPS1-related proline-alanine-rich protein kinase isoform X1 | 27347 | STK39 | 535 | nan | nan	XP_016859302	37.37	4	2	2	Carbamidomethylation	436.2	632.12	821.44	0	0	0	436.2	632.12	821.44	0	0	0	1.00:1.45:1.88:0:0:0	726.78	0	726.78	0	#DIV/0!	1.00:0	58617
1724	12762	| STE20/SPS1-related proline-alanine-rich protein kinase | 27347 | STK39 | 545 | Q9UEW8 | sp	NP_037365	37.37	4	2	2	Carbamidomethylation	436.2	632.12	821.44	0	0	0	436.2	632.12	821.44	0	0	0	1.00:1.45:1.88:0:0:0	726.78	0	726.78	0	#DIV/0!	1.00:0	59474
1724	12926	| STE20/SPS1-related proline-alanine-rich protein kinase isoform X2 | 27347 | STK39 | 524 | nan | nan	XP_005246522	37.37	4	2	2	Carbamidomethylation	436.2	632.12	821.44	0	0	0	436.2	632.12	821.44	0	0	0	1.00:1.45:1.88:0:0:0	726.78	0	726.78	0	#DIV/0!	1.00:0	57282
1428	11676	| DNA-(apurinic or apyrimidinic site) lyase | 328 | APEX1 | 318 | P27695 | sp	NP_001632	37.32	9	2	2		552.69	300.08	302.51	0	0	0	552.69	300.08	302.51	0	0	0	1.00:0.54:0.55:0:0:0	577.64	0	577.64	0	#DIV/0!	1.00:0	35555
1428	11677	| DNA-(apurinic or apyrimidinic site) lyase | 328 | APEX1 | 318 | P27695 | sp	NP_542380	37.32	9	2	2		552.69	300.08	302.51	0	0	0	552.69	300.08	302.51	0	0	0	1.00:0.54:0.55:0:0:0	577.64	0	577.64	0	#DIV/0!	1.00:0	35555
1428	11678	| DNA-(apurinic or apyrimidinic site) lyase | 328 | APEX1 | 318 | P27695 | sp	NP_542379	37.32	9	2	2		552.69	300.08	302.51	0	0	0	552.69	300.08	302.51	0	0	0	1.00:0.54:0.55:0:0:0	577.64	0	577.64	0	#DIV/0!	1.00:0	35555
1428	11679	| DNA-(apurinic or apyrimidinic site) lyase | 328 | APEX1 | 318 | P27695 | sp	NP_001231178	37.32	9	2	2		552.69	300.08	302.51	0	0	0	552.69	300.08	302.51	0	0	0	1.00:0.54:0.55:0:0:0	577.64	0	577.64	0	#DIV/0!	1.00:0	35555
1530	12217	| E3 SUMO-protein ligase NSE2 isoform 1 | 286053 | NSMCE2 | 247 | nan | nan	NP_001336414	37.28	14	2	2		605.6	471.89	880.32	0	0	0	605.6	471.89	880.32	0	0	0	1.00:0.78:1.45:0:0:0	805.22	0	805.22	0	#DIV/0!	1.00:0	27932
1530	12218	| E3 SUMO-protein ligase NSE2 isoform X2 | 286053 | NSMCE2 | 247 | nan | nan	XP_024302898	37.28	14	2	2		605.6	471.89	880.32	0	0	0	605.6	471.89	880.32	0	0	0	1.00:0.78:1.45:0:0:0	805.22	0	805.22	0	#DIV/0!	1.00:0	27932
1530	12219	| E3 SUMO-protein ligase NSE2 isoform X2 | 286053 | NSMCE2 | 247 | Q96MF7 | sp	XP_011515276	37.28	14	2	2		605.6	471.89	880.32	0	0	0	605.6	471.89	880.32	0	0	0	1.00:0.78:1.45:0:0:0	805.22	0	805.22	0	#DIV/0!	1.00:0	27932
1530	12220	| E3 SUMO-protein ligase NSE2 isoform X2 | 286053 | NSMCE2 | 247 | Q96MF7 | sp	XP_016868820	37.28	14	2	2		605.6	471.89	880.32	0	0	0	605.6	471.89	880.32	0	0	0	1.00:0.78:1.45:0:0:0	805.22	0	805.22	0	#DIV/0!	1.00:0	27932
1530	12221	| E3 SUMO-protein ligase NSE2 isoform 1 | 286053 | NSMCE2 | 247 | nan | nan	NP_001336415	37.28	14	2	2		605.6	471.89	880.32	0	0	0	605.6	471.89	880.32	0	0	0	1.00:0.78:1.45:0:0:0	805.22	0	805.22	0	#DIV/0!	1.00:0	27932
1530	12222	| E3 SUMO-protein ligase NSE2 isoform 1 | 286053 | NSMCE2 | 247 | Q96MF7 | sp	NP_775956	37.28	14	2	2		605.6	471.89	880.32	0	0	0	605.6	471.89	880.32	0	0	0	1.00:0.78:1.45:0:0:0	805.22	0	805.22	0	#DIV/0!	1.00:0	27932
1530	12223	| E3 SUMO-protein ligase NSE2 isoform X2 | 286053 | NSMCE2 | 247 | Q96MF7 | sp	XP_011515277	37.28	14	2	2		605.6	471.89	880.32	0	0	0	605.6	471.89	880.32	0	0	0	1.00:0.78:1.45:0:0:0	805.22	0	805.22	0	#DIV/0!	1.00:0	27932
1586	14292	| tRNA pseudouridine synthase-like 1 isoform 2 | 126789 | PUSL1 | 303 | Q8N0Z8 | sp	NP_699170	37.27	17	3	3		1557.4	882.37	1215.4	0	0	0	1557.4	882.37	1215.4	0	0	0	1.00:0.57:0.78:0:0:0	1310.2	0	1310.2	0	#DIV/0!	1.00:0	33233
1586	14293	| tRNA pseudouridine synthase-like 1 isoform 1 | 126789 | PUSL1 | 326 | nan | nan	NP_001333045	37.27	15	3	3		1557.4	882.37	1215.4	0	0	0	1557.4	882.37	1215.4	0	0	0	1.00:0.57:0.78:0:0:0	1310.2	0	1310.2	0	#DIV/0!	1.00:0	35640
2017	14808	| vitamin K epoxide reductase complex subunit 1-like protein 1 | 154807 | VKORC1L1 | 176 | Q8N0U8 | sp	NP_775788	37.21	12	2	2	Carbamidomethylation	595.33	493.79	906.37	0	0	0	595.33	493.79	906.37	0	0	0	1.00:0.83:1.52:0:0:0	923.86	0	923.86	0	#DIV/0!	1.00:0	19836
1705	14532	| HAUS augmin-like complex subunit 2 isoform 1 | 55142 | HAUS2 | 235 | Q9NVX0 | sp	NP_060567	37.15	10	2	2		667.46	440.47	349.35	0	0	0	667.46	440.47	349.35	0	0	0	1.00:0.66:0.52:0:0:0	703.64	0	703.64	0	#DIV/0!	1.00:0	26933
1953	14870	| endoribonuclease LACTB2 | 51110 | LACTB2 | 288 | Q53H82 | sp	NP_057111	37.12	3	1	1		659.28	385.07	362.15	0	0	0	659.28	385.07	362.15	0	0	0	1.00:0.58:0.55:0:0:0	468.83	0	468.83	0	#DIV/0!	1.00:0	32806
1949	19048	| DDB1- and CUL4-associated factor 7 | 10238 | DCAF7 | 342 | P61962 | sp	NP_005819	37.09	8	2	2		780.72	265.6	739.85	0	0	0	780.72	265.6	739.85	0	0	0	1.00:0.34:0.95:0:0:0	752.65	0	752.65	0	#DIV/0!	1.00:0	38926
1540	10121	| zinc finger protein 644 isoform X1 | 84146 | ZNF644 | 1368 | nan | nan	XP_016857976	37.04	3	3	3	Carbamidomethylation	661.42	339.25	1182.5	0	0	0	661.42	339.25	1182.5	0	0	0	1.00:0.51:1.79:0:0:0	1105.2	0	1105.2	0	#DIV/0!	1.00:0	153939
1497	9936	| U4/U6 small nuclear ribonucleoprotein Prp4 isoform 2 | 9128 | PRPF4 | 521 | O43172 | sp	NP_001231855	37.01	9	3	3	Carbamidomethylation	1546.9	966.04	1565.7	0	0	0	1546.9	966.04	1565.7	0	0	0	1.00:0.62:1.01:0:0:0	1501.2	0	1501.2	0	#DIV/0!	1.00:0	58321
1497	9937	| U4/U6 small nuclear ribonucleoprotein Prp4 isoform 1 | 9128 | PRPF4 | 522 | O43172 | sp	NP_004688	37.01	9	3	3	Carbamidomethylation	1546.9	966.04	1565.7	0	0	0	1546.9	966.04	1565.7	0	0	0	1.00:0.62:1.01:0:0:0	1501.2	0	1501.2	0	#DIV/0!	1.00:0	58449
156	644	| translocation protein SEC63 homolog | 11231 | SEC63 | 760 | Q9UGP8 | sp	NP_009145	36.98	32	19	19	Carbamidomethylation	14675	11494	14941	373.3	0	324.33	4934.5	3904.8	5099.9	373.3	0	324.33	1.00:0.79:1.03:0.08:0:0.07	14748	697.64	4646.4	697.64	6.66017	1.00:0.15	87997
1928	13124	| serine/threonine-protein kinase 3 isoform X6 | 6788 | STK3 | 456 | nan | nan	XP_016869247	36.94	9	3	3	Carbamidomethylation	981.42	699.52	1238.1	0	0	0	981.42	699.52	1238.1	0	0	0	1.00:0.71:1.26:0:0:0	1108.8	0	1108.8	0	#DIV/0!	1.00:0	51689
1928	14343	| serine/threonine-protein kinase 3 isoform X13 | 6788 | STK3 | 313 | nan | nan	XP_016869251	36.94	14	3	3	Carbamidomethylation	981.42	699.52	1238.1	0	0	0	981.42	699.52	1238.1	0	0	0	1.00:0.71:1.26:0:0:0	1108.8	0	1108.8	0	#DIV/0!	1.00:0	35420
1928	14344	| serine/threonine-protein kinase 3 isoform X12 | 6788 | STK3 | 313 | nan | nan	XP_011515559	36.94	14	3	3	Carbamidomethylation	981.42	699.52	1238.1	0	0	0	981.42	699.52	1238.1	0	0	0	1.00:0.71:1.26:0:0:0	1108.8	0	1108.8	0	#DIV/0!	1.00:0	35420
1928	14345	| serine/threonine-protein kinase 3 isoform X9 | 6788 | STK3 | 403 | nan | nan	XP_016869250	36.94	11	3	3	Carbamidomethylation	981.42	699.52	1238.1	0	0	0	981.42	699.52	1238.1	0	0	0	1.00:0.71:1.26:0:0:0	1108.8	0	1108.8	0	#DIV/0!	1.00:0	45986
1928	14346	| serine/threonine-protein kinase 3 isoform 1 | 6788 | STK3 | 491 | Q13188 | sp	NP_006272	36.94	9	3	3	Carbamidomethylation	981.42	699.52	1238.1	0	0	0	981.42	699.52	1238.1	0	0	0	1.00:0.71:1.26:0:0:0	1108.8	0	1108.8	0	#DIV/0!	1.00:0	56301
1928	14347	| serine/threonine-protein kinase 3 isoform 2 | 6788 | STK3 | 519 | Q13188 | sp	NP_001243241	36.94	8	3	3	Carbamidomethylation	981.42	699.52	1238.1	0	0	0	981.42	699.52	1238.1	0	0	0	1.00:0.71:1.26:0:0:0	1108.8	0	1108.8	0	#DIV/0!	1.00:0	59462
1928	14348	| serine/threonine-protein kinase 3 isoform X3 | 6788 | STK3 | 524 | nan | nan	XP_016869246	36.94	8	3	3	Carbamidomethylation	981.42	699.52	1238.1	0	0	0	981.42	699.52	1238.1	0	0	0	1.00:0.71:1.26:0:0:0	1108.8	0	1108.8	0	#DIV/0!	1.00:0	59811
1928	14349	| serine/threonine-protein kinase 3 isoform X2 | 6788 | STK3 | 576 | nan | nan	XP_011515550	36.94	7	3	3	Carbamidomethylation	981.42	699.52	1238.1	0	0	0	981.42	699.52	1238.1	0	0	0	1.00:0.71:1.26:0:0:0	1108.8	0	1108.8	0	#DIV/0!	1.00:0	66168
1928	14350	| serine/threonine-protein kinase 3 isoform X1 | 6788 | STK3 | 580 | nan | nan	XP_016869245	36.94	7	3	3	Carbamidomethylation	981.42	699.52	1238.1	0	0	0	981.42	699.52	1238.1	0	0	0	1.00:0.71:1.26:0:0:0	1108.8	0	1108.8	0	#DIV/0!	1.00:0	66199
1588	11597	| V-type proton ATPase subunit H isoform 2 | 51606 | ATP6V1H | 465 | Q9UI12 | sp	NP_998784	36.91	12	3	3		591.05	930.37	1020.6	0	0	0	591.05	930.37	1020.6	0	0	0	1.00:1.57:1.73:0:0:0	1470.7	0	1470.7	0	#DIV/0!	1.00:0	54151
1588	11598	| V-type proton ATPase subunit H isoform X1 | 51606 | ATP6V1H | 465 | Q9UI12 | sp	XP_006716518	36.91	12	3	3		591.05	930.37	1020.6	0	0	0	591.05	930.37	1020.6	0	0	0	1.00:1.57:1.73:0:0:0	1470.7	0	1470.7	0	#DIV/0!	1.00:0	54151
1588	11599	| V-type proton ATPase subunit H isoform 1 | 51606 | ATP6V1H | 483 | Q9UI12 | sp	NP_057025	36.91	12	3	3		591.05	930.37	1020.6	0	0	0	591.05	930.37	1020.6	0	0	0	1.00:1.57:1.73:0:0:0	1470.7	0	1470.7	0	#DIV/0!	1.00:0	55883
1588	11600	| V-type proton ATPase subunit H isoform 1 | 51606 | ATP6V1H | 483 | Q9UI12 | sp	NP_998785	36.91	12	3	3		591.05	930.37	1020.6	0	0	0	591.05	930.37	1020.6	0	0	0	1.00:1.57:1.73:0:0:0	1470.7	0	1470.7	0	#DIV/0!	1.00:0	55883
1483	7611	| 26S proteasome non-ATPase regulatory subunit 12 isoform 1 | 5718 | PSMD12 | 456 | O00232 | sp	NP_002807	36.87	5	2	2		489.77	789.51	851.17	0	0	0	489.77	789.51	851.17	0	0	0	1.00:1.61:1.74:0:0:0	784.57	0	784.57	0	#DIV/0!	1.00:0	52904
1483	7613	| 26S proteasome non-ATPase regulatory subunit 12 isoform X1 | 5718 | PSMD12 | 485 | nan | nan	XP_024306610	36.87	5	2	2		489.77	789.51	851.17	0	0	0	489.77	789.51	851.17	0	0	0	1.00:1.61:1.74:0:0:0	784.57	0	784.57	0	#DIV/0!	1.00:0	56065
2091	16076	| protein SMG5 isoform 4 | 23381 | SMG5 | 950 | nan | nan	NP_001310545	36.87	3	2	2		334.77	344.87	600.15	0	0	0	334.77	344.87	600.15	0	0	0	1.00:1.03:1.79:0:0:0	623.88	0	623.88	0	#DIV/0!	1.00:0	106397
2091	16077	| protein SMG5 isoform 4 | 23381 | SMG5 | 950 | nan | nan	NP_001310546	36.87	3	2	2		334.77	344.87	600.15	0	0	0	334.77	344.87	600.15	0	0	0	1.00:1.03:1.79:0:0:0	623.88	0	623.88	0	#DIV/0!	1.00:0	106397
2091	16078	| protein SMG5 isoform 2 | 23381 | SMG5 | 963 | nan | nan	NP_001310543	36.87	3	2	2		334.77	344.87	600.15	0	0	0	334.77	344.87	600.15	0	0	0	1.00:1.03:1.79:0:0:0	623.88	0	623.88	0	#DIV/0!	1.00:0	107963
2091	16079	| protein SMG5 isoform 3 | 23381 | SMG5 | 970 | nan | nan	NP_001310544	36.87	3	2	2		334.77	344.87	600.15	0	0	0	334.77	344.87	600.15	0	0	0	1.00:1.03:1.79:0:0:0	623.88	0	623.88	0	#DIV/0!	1.00:0	108974
2091	16080	| protein SMG5 isoform 1 | 23381 | SMG5 | 1016 | Q9UPR3 | sp	NP_056142	36.87	3	2	2		334.77	344.87	600.15	0	0	0	334.77	344.87	600.15	0	0	0	1.00:1.03:1.79:0:0:0	623.88	0	623.88	0	#DIV/0!	1.00:0	113928
1218	7008	| cytoskeleton-associated protein 4 | 10970 | CKAP4 | 602 | Q07065 | sp	NP_006816	36.85	8	3	3		1301.7	747.9	1084.1	0	0	0	1301.7	747.9	1084.1	0	0	0	1.00:0.57:0.83:0:0:0	1271.9	0	1271.9	0	#DIV/0!	1.00:0	66023
174	1254	| WD repeat-containing protein 43 | 23160 | WDR43 | 677 | Q15061 | sp	NP_055946	36.85	35	15	15	Carbamidomethylation	15258	13761	18149	1038.5	1346	1258.8	5618.8	5653.1	6527.1	1038.5	1346	1258.8	1.00:1.01:1.16:0.18:0.24:0.22	16170	1214.5	6064.9	1214.5	4.99374	1.00:0.20	74891
1444	12923	| replication factor C subunit 2 isoform 1 | 5982 | RFC2 | 354 | P35250 | sp	NP_852136	36.82	9	2	2		456.29	315.31	599.97	0	0	0	456.29	315.31	599.97	0	0	0	1.00:0.69:1.31:0:0:0	534.36	0	534.36	0	#DIV/0!	1.00:0	39157
1258	9359	| ras-related C3 botulinum toxin substrate 1 isoform Rac1 | 5879 | RAC1 | 192 | P63000 | sp	NP_008839	36.76	24	5	5	Carbamidomethylation	5246.8	4086	4266	217.9	0	250.28	4329.7	3116.4	3263.2	217.9	0	250.28	1.00:0.72:0.75:0.05:0:0.06	4532.9	234.09	3569.8	234.09	15.2497	1.00:0.07	21450
1884	15059	| annexin A11 isoform X1 | 311 | ANXA11 | 605 | nan | nan	XP_005269798	36.74	2	1	1		263.19	445.52	483.05	0	0	0	263.19	445.52	483.05	0	0	0	1.00:1.69:1.84:0:0:0	397.25	0	397.25	0	#DIV/0!	1.00:0	65624
1884	15398	| annexin A11 isoform 2 | 311 | ANXA11 | 472 | P50995 | sp	NP_001265338	36.74	2	1	1		263.19	445.52	483.05	0	0	0	263.19	445.52	483.05	0	0	0	1.00:1.69:1.84:0:0:0	397.25	0	397.25	0	#DIV/0!	1.00:0	51242
1884	15399	| annexin A11 isoform 1 | 311 | ANXA11 | 505 | P50995 | sp	NP_001148	36.74	2	1	1		263.19	445.52	483.05	0	0	0	263.19	445.52	483.05	0	0	0	1.00:1.69:1.84:0:0:0	397.25	0	397.25	0	#DIV/0!	1.00:0	54390
1884	15400	| annexin A11 isoform 1 | 311 | ANXA11 | 505 | P50995 | sp	NP_001265336	36.74	2	1	1		263.19	445.52	483.05	0	0	0	263.19	445.52	483.05	0	0	0	1.00:1.69:1.84:0:0:0	397.25	0	397.25	0	#DIV/0!	1.00:0	54390
1884	15401	| annexin A11 isoform 1 | 311 | ANXA11 | 505 | P50995 | sp	NP_665875	36.74	2	1	1		263.19	445.52	483.05	0	0	0	263.19	445.52	483.05	0	0	0	1.00:1.69:1.84:0:0:0	397.25	0	397.25	0	#DIV/0!	1.00:0	54390
1884	15402	| annexin A11 isoform 1 | 311 | ANXA11 | 505 | P50995 | sp	NP_665876	36.74	2	1	1		263.19	445.52	483.05	0	0	0	263.19	445.52	483.05	0	0	0	1.00:1.69:1.84:0:0:0	397.25	0	397.25	0	#DIV/0!	1.00:0	54390
1884	15403	| annexin A11 isoform 1 | 311 | ANXA11 | 505 | P50995 | sp	NP_001265337	36.74	2	1	1		263.19	445.52	483.05	0	0	0	263.19	445.52	483.05	0	0	0	1.00:1.69:1.84:0:0:0	397.25	0	397.25	0	#DIV/0!	1.00:0	54390
1884	15404	| annexin A11 isoform X3 | 311 | ANXA11 | 505 | P50995 | sp	XP_011538038	36.74	2	1	1		263.19	445.52	483.05	0	0	0	263.19	445.52	483.05	0	0	0	1.00:1.69:1.84:0:0:0	397.25	0	397.25	0	#DIV/0!	1.00:0	54390
1884	15405	| annexin A11 isoform X2 | 311 | ANXA11 | 542 | nan | nan	XP_006717876	36.74	2	1	1		263.19	445.52	483.05	0	0	0	263.19	445.52	483.05	0	0	0	1.00:1.69:1.84:0:0:0	397.25	0	397.25	0	#DIV/0!	1.00:0	58147
1884	15406	| annexin A11 isoform X2 | 311 | ANXA11 | 542 | nan | nan	XP_005269799	36.74	2	1	1		263.19	445.52	483.05	0	0	0	263.19	445.52	483.05	0	0	0	1.00:1.69:1.84:0:0:0	397.25	0	397.25	0	#DIV/0!	1.00:0	58147
169	212	| zinc finger CCHC domain-containing protein 8 isoform 1 | 55596 | ZCCHC8 | 707 | Q6NZY4 | sp	NP_060082	36.73	36	17	17	Carbamidomethylation	8329	6266.1	10572	464.75	431.62	866.27	3113.4	2379.4	3282.3	464.75	431.62	591.6	1.00:0.76:1.05:0.15:0.14:0.19	9769.6	770.65	2925	495.99	5.8973	1.00:0.17	78577
1503	10870	| bromodomain-containing protein 7 isoform 2 | 29117 | BRD7 | 651 | Q9NPI1 | sp	NP_037395	36.71	5	2	2		396	324.32	608.89	0	0	0	396	324.32	608.89	0	0	0	1.00:0.82:1.54:0:0:0	612.59	0	612.59	0	#DIV/0!	1.00:0	74139
1552	14268	| iron-sulfur cluster assembly enzyme ISCU mitochondrial isoform 1 | 23479 | ISCU | 142 | Q9H1K1 | sp	NP_055116	36.66	34	3	3	Carbamidomethylation	1291.4	923.01	1578.2	0	0	0	1291.4	923.01	1578.2	0	0	0	1.00:0.71:1.22:0:0:0	1264.2	0	1264.2	0	#DIV/0!	1.00:0	15263
1552	14269	| iron-sulfur cluster assembly enzyme ISCU mitochondrial isoform 2 | 23479 | ISCU | 167 | Q9H1K1 | sp	NP_998760	36.66	29	3	3	Carbamidomethylation	1291.4	923.01	1578.2	0	0	0	1291.4	923.01	1578.2	0	0	0	1.00:0.71:1.22:0:0:0	1264.2	0	1264.2	0	#DIV/0!	1.00:0	17999
1207	10509	| probable ATP-dependent RNA helicase DHX40 isoform 2 | 79665 | DHX40 | 702 | Q8IX18 | sp	NP_001159773	36.57	6	3	3	Carbamidomethylation	790.42	1193.9	1329	0	0	0	790.42	1193.9	1329	0	0	0	1.00:1.51:1.68:0:0:0	1343.3	0	1343.3	0	#DIV/0!	1.00:0	80221
1207	10510	| probable ATP-dependent RNA helicase DHX40 isoform X3 | 79665 | DHX40 | 718 | nan | nan	XP_011523555	36.57	6	3	3	Carbamidomethylation	790.42	1193.9	1329	0	0	0	790.42	1193.9	1329	0	0	0	1.00:1.51:1.68:0:0:0	1343.3	0	1343.3	0	#DIV/0!	1.00:0	81657
1207	10511	| probable ATP-dependent RNA helicase DHX40 isoform X1 | 79665 | DHX40 | 752 | nan | nan	XP_006722146	36.57	6	3	3	Carbamidomethylation	790.42	1193.9	1329	0	0	0	790.42	1193.9	1329	0	0	0	1.00:1.51:1.68:0:0:0	1343.3	0	1343.3	0	#DIV/0!	1.00:0	85343
1207	10512	| probable ATP-dependent RNA helicase DHX40 isoform 1 | 79665 | DHX40 | 779 | Q8IX18 | sp	NP_078888	36.57	6	3	3	Carbamidomethylation	790.42	1193.9	1329	0	0	0	790.42	1193.9	1329	0	0	0	1.00:1.51:1.68:0:0:0	1343.3	0	1343.3	0	#DIV/0!	1.00:0	88560
514	3377	| vigilin isoform X1 | 3069 | HDLBP | 1268 | nan | nan	XP_024308601	36.43	13	10	10	Carbamidomethylation; Acetylation (Protein N-term)	4793.3	4606.6	5551.7	641.46	771.97	606.7	2948.2	2636.5	2502.8	641.46	771.97	606.7	1.00:0.89:0.85:0.22:0.26:0.21	5432.4	772.59	2695.8	772.59	3.4893	1.00:0.29	141439
514	3378	| vigilin isoform a | 3069 | HDLBP | 1268 | Q00341 | sp	NP_001307894	36.43	13	10	10	Carbamidomethylation; Acetylation (Protein N-term)	4793.3	4606.6	5551.7	641.46	771.97	606.7	2948.2	2636.5	2502.8	641.46	771.97	606.7	1.00:0.89:0.85:0.22:0.26:0.21	5432.4	772.59	2695.8	772.59	3.4893	1.00:0.29	141439
514	3379	| vigilin isoform X1 | 3069 | HDLBP | 1268 | Q00341 | sp	XP_005247059	36.43	13	10	10	Carbamidomethylation; Acetylation (Protein N-term)	4793.3	4606.6	5551.7	641.46	771.97	606.7	2948.2	2636.5	2502.8	641.46	771.97	606.7	1.00:0.89:0.85:0.22:0.26:0.21	5432.4	772.59	2695.8	772.59	3.4893	1.00:0.29	141439
514	3380	| vigilin isoform a | 3069 | HDLBP | 1268 | Q00341 | sp	NP_001307895	36.43	13	10	10	Carbamidomethylation; Acetylation (Protein N-term)	4793.3	4606.6	5551.7	641.46	771.97	606.7	2948.2	2636.5	2502.8	641.46	771.97	606.7	1.00:0.89:0.85:0.22:0.26:0.21	5432.4	772.59	2695.8	772.59	3.4893	1.00:0.29	141439
514	3381	| vigilin isoform a | 3069 | HDLBP | 1268 | Q00341 | sp	NP_976221	36.43	13	10	10	Carbamidomethylation; Acetylation (Protein N-term)	4793.3	4606.6	5551.7	641.46	771.97	606.7	2948.2	2636.5	2502.8	641.46	771.97	606.7	1.00:0.89:0.85:0.22:0.26:0.21	5432.4	772.59	2695.8	772.59	3.4893	1.00:0.29	141439
514	3382	| vigilin isoform X1 | 3069 | HDLBP | 1268 | Q00341 | sp	XP_011509360	36.43	13	10	10	Carbamidomethylation; Acetylation (Protein N-term)	4793.3	4606.6	5551.7	641.46	771.97	606.7	2948.2	2636.5	2502.8	641.46	771.97	606.7	1.00:0.89:0.85:0.22:0.26:0.21	5432.4	772.59	2695.8	772.59	3.4893	1.00:0.29	141439
514	3383	| vigilin isoform X1 | 3069 | HDLBP | 1268 | nan | nan	XP_024308600	36.43	13	10	10	Carbamidomethylation; Acetylation (Protein N-term)	4793.3	4606.6	5551.7	641.46	771.97	606.7	2948.2	2636.5	2502.8	641.46	771.97	606.7	1.00:0.89:0.85:0.22:0.26:0.21	5432.4	772.59	2695.8	772.59	3.4893	1.00:0.29	141439
514	3384	| vigilin isoform X1 | 3069 | HDLBP | 1268 | Q00341 | sp	XP_011509362	36.43	13	10	10	Carbamidomethylation; Acetylation (Protein N-term)	4793.3	4606.6	5551.7	641.46	771.97	606.7	2948.2	2636.5	2502.8	641.46	771.97	606.7	1.00:0.89:0.85:0.22:0.26:0.21	5432.4	772.59	2695.8	772.59	3.4893	1.00:0.29	141439
514	3385	| vigilin isoform X1 | 3069 | HDLBP | 1268 | Q00341 | sp	XP_016859429	36.43	13	10	10	Carbamidomethylation; Acetylation (Protein N-term)	4793.3	4606.6	5551.7	641.46	771.97	606.7	2948.2	2636.5	2502.8	641.46	771.97	606.7	1.00:0.89:0.85:0.22:0.26:0.21	5432.4	772.59	2695.8	772.59	3.4893	1.00:0.29	141439
514	3386	| vigilin isoform a | 3069 | HDLBP | 1268 | Q00341 | sp	NP_005327	36.43	13	10	10	Carbamidomethylation; Acetylation (Protein N-term)	4793.3	4606.6	5551.7	641.46	771.97	606.7	2948.2	2636.5	2502.8	641.46	771.97	606.7	1.00:0.89:0.85:0.22:0.26:0.21	5432.4	772.59	2695.8	772.59	3.4893	1.00:0.29	141439
514	3387	| vigilin isoform X1 | 3069 | HDLBP | 1268 | Q00341 | sp	XP_006712538	36.43	13	10	10	Carbamidomethylation; Acetylation (Protein N-term)	4793.3	4606.6	5551.7	641.46	771.97	606.7	2948.2	2636.5	2502.8	641.46	771.97	606.7	1.00:0.89:0.85:0.22:0.26:0.21	5432.4	772.59	2695.8	772.59	3.4893	1.00:0.29	141439
1681	13974	| sorting nexin-9 isoform X2 | 51429 | SNX9 | 501 | nan | nan	XP_011534188	36.43	3	1	1		677.4	409.72	696.1	0	0	0	677.4	409.72	696.1	0	0	0	1.00:0.60:1.03:0:0:0	594.41	0	594.41	0	#DIV/0!	1.00:0	56783
1681	13975	| sorting nexin-9 isoform X1 | 51429 | SNX9 | 588 | nan | nan	XP_005267072	36.43	2	1	1		677.4	409.72	696.1	0	0	0	677.4	409.72	696.1	0	0	0	1.00:0.60:1.03:0:0:0	594.41	0	594.41	0	#DIV/0!	1.00:0	65834
1681	13976	| sorting nexin-9 | 51429 | SNX9 | 595 | Q9Y5X1 | sp	NP_057308	36.43	2	1	1		677.4	409.72	696.1	0	0	0	677.4	409.72	696.1	0	0	0	1.00:0.60:1.03:0:0:0	594.41	0	594.41	0	#DIV/0!	1.00:0	66592
1624	12597	| TATA-binding protein-associated factor 172 isoform X1 | 9044 | BTAF1 | 1812 | nan | nan	XP_011538628	36.38	2	3	3		545.31	544.89	903.75	0	0	0	545.31	544.89	903.75	0	0	0	1.00:1.00:1.66:0:0:0	870.15	0	870.15	0	#DIV/0!	1.00:0	202780
1624	12598	| TATA-binding protein-associated factor 172 | 9044 | BTAF1 | 1849 | O14981 | sp	NP_003963	36.38	2	3	3		545.31	544.89	903.75	0	0	0	545.31	544.89	903.75	0	0	0	1.00:1.00:1.66:0:0:0	870.15	0	870.15	0	#DIV/0!	1.00:0	206886
1624	12613	| TATA-binding protein-associated factor 172 isoform X2 | 9044 | BTAF1 | 1800 | nan | nan	XP_016872366	36.38	2	3	3		545.31	544.89	903.75	0	0	0	545.31	544.89	903.75	0	0	0	1.00:1.00:1.66:0:0:0	870.15	0	870.15	0	#DIV/0!	1.00:0	201472
1281	10360	| guanine nucleotide-binding protein-like 3-like protein | 54552 | GNL3L | 582 | Q9NVN8 | sp	NP_061940	36.36	8	3	3	Carbamidomethylation	906.7	601.76	1029.9	0	0	0	906.7	601.76	1029.9	0	0	0	1.00:0.66:1.14:0:0:0	960.39	0	960.39	0	#DIV/0!	1.00:0	65573
1281	10361	| guanine nucleotide-binding protein-like 3-like protein | 54552 | GNL3L | 582 | Q9NVN8 | sp	NP_001171748	36.36	8	3	3	Carbamidomethylation	906.7	601.76	1029.9	0	0	0	906.7	601.76	1029.9	0	0	0	1.00:0.66:1.14:0:0:0	960.39	0	960.39	0	#DIV/0!	1.00:0	65573
246	1295	| kinesin-like protein KIF23 isoform 1 | 9493 | KIF23 | 960 | Q02241 | sp	NP_612565	36.36	23	15	15	Carbamidomethylation	10253	8298.8	12588	0	0	301.22	5085.8	3794.7	5898.5	0	0	0	1.00:0.75:1.16:0:0:0	11216	301.22	4926.3	0	#DIV/0!	1.00:0	110059
246	1348	| kinesin-like protein KIF23 isoform X1 | 9493 | KIF23 | 974 | nan | nan	XP_005254853	36.36	23	15	15	Carbamidomethylation	10253	8298.8	12588	0	0	301.22	5085.8	3794.7	5898.5	0	0	0	1.00:0.75:1.16:0:0:0	11216	301.22	4926.3	0	#DIV/0!	1.00:0	111699
690	7731	| KH domain-containing RNA-binding signal transduction-associated | 10657 | KHDRBS1 | 443 | Q07666 | sp	NP_006550	36.35	13	6	6		12971	10964	13577	1279.2	2024	2342.5	10777	9365	11828	1279.2	1650	1793	1.00:0.87:1.10:0.12:0.15:0.17	13655	2035.8	11274	1574.1	7.16219	1.00:0.14	48227
1747	12224	| cyclin-dependent kinase 7 isoform 3 | 1022 | CDK7 | 289 | P50613 | sp	NP_001310999	36.29	14	3	3		1375.5	925.01	1522.7	0	0	0	1375.5	925.01	1522.7	0	0	0	1.00:0.67:1.11:0:0:0	1414.7	0	1414.7	0	#DIV/0!	1.00:0	32611
1747	12226	| cyclin-dependent kinase 7 isoform 1 | 1022 | CDK7 | 346 | P50613 | sp	NP_001790	36.29	12	3	3		1375.5	925.01	1522.7	0	0	0	1375.5	925.01	1522.7	0	0	0	1.00:0.67:1.11:0:0:0	1414.7	0	1414.7	0	#DIV/0!	1.00:0	39038
1485	13413	| enhancer of mRNA-decapping protein 3 isoform 1 | 80153 | EDC3 | 508 | Q96F86 | sp	NP_001135916	36.26	5	2	2		1134.1	766.03	1284	0	0	0	1134.1	766.03	1284	0	0	0	1.00:0.68:1.13:0:0:0	1061.4	0	1061.4	0	#DIV/0!	1.00:0	56078
1485	13415	| enhancer of mRNA-decapping protein 3 isoform 1 | 80153 | EDC3 | 508 | Q96F86 | sp	NP_079359	36.26	5	2	2		1134.1	766.03	1284	0	0	0	1134.1	766.03	1284	0	0	0	1.00:0.68:1.13:0:0:0	1061.4	0	1061.4	0	#DIV/0!	1.00:0	56078
1485	13417	| enhancer of mRNA-decapping protein 3 isoform X1 | 80153 | EDC3 | 508 | nan | nan	XP_024305847	36.26	5	2	2		1134.1	766.03	1284	0	0	0	1134.1	766.03	1284	0	0	0	1.00:0.68:1.13:0:0:0	1061.4	0	1061.4	0	#DIV/0!	1.00:0	56078
1485	13418	| enhancer of mRNA-decapping protein 3 isoform X1 | 80153 | EDC3 | 508 | nan | nan	XP_024305846	36.26	5	2	2		1134.1	766.03	1284	0	0	0	1134.1	766.03	1284	0	0	0	1.00:0.68:1.13:0:0:0	1061.4	0	1061.4	0	#DIV/0!	1.00:0	56078
1485	13419	| enhancer of mRNA-decapping protein 3 isoform 1 | 80153 | EDC3 | 508 | Q96F86 | sp	NP_001135915	36.26	5	2	2		1134.1	766.03	1284	0	0	0	1134.1	766.03	1284	0	0	0	1.00:0.68:1.13:0:0:0	1061.4	0	1061.4	0	#DIV/0!	1.00:0	56078
1485	13420	| enhancer of mRNA-decapping protein 3 isoform X1 | 80153 | EDC3 | 508 | nan | nan	XP_024305845	36.26	5	2	2		1134.1	766.03	1284	0	0	0	1134.1	766.03	1284	0	0	0	1.00:0.68:1.13:0:0:0	1061.4	0	1061.4	0	#DIV/0!	1.00:0	56078
1485	13421	| enhancer of mRNA-decapping protein 3 isoform 1 | 80153 | EDC3 | 508 | nan | nan	NP_001338307	36.26	5	2	2		1134.1	766.03	1284	0	0	0	1134.1	766.03	1284	0	0	0	1.00:0.68:1.13:0:0:0	1061.4	0	1061.4	0	#DIV/0!	1.00:0	56078
1485	13621	| enhancer of mRNA-decapping protein 3 isoform 2 | 80153 | EDC3 | 363 | nan | nan	NP_001338308	36.26	7	2	2		1134.1	766.03	1284	0	0	0	1134.1	766.03	1284	0	0	0	1.00:0.68:1.13:0:0:0	1061.4	0	1061.4	0	#DIV/0!	1.00:0	40634
1485	13903	| enhancer of mRNA-decapping protein 3 isoform X2 | 80153 | EDC3 | 325 | nan | nan	XP_011520394	36.26	8	2	2		1134.1	766.03	1284	0	0	0	1134.1	766.03	1284	0	0	0	1.00:0.68:1.13:0:0:0	1061.4	0	1061.4	0	#DIV/0!	1.00:0	36324
1941	16467	| calpain-1 catalytic subunit isoform X1 | 823 | CAPN1 | 714 | P07384 | sp	XP_011543594	36.26	4	2	2		401.29	669.46	388.81	0	0	0	401.29	669.46	388.81	0	0	0	1.00:1.67:0.97:0:0:0	648.1	0	648.1	0	#DIV/0!	1.00:0	81890
1941	16468	| calpain-1 catalytic subunit | 823 | CAPN1 | 714 | P07384 | sp	NP_005177	36.26	4	2	2		401.29	669.46	388.81	0	0	0	401.29	669.46	388.81	0	0	0	1.00:1.67:0.97:0:0:0	648.1	0	648.1	0	#DIV/0!	1.00:0	81890
1941	16469	| calpain-1 catalytic subunit | 823 | CAPN1 | 714 | P07384 | sp	NP_001185798	36.26	4	2	2		401.29	669.46	388.81	0	0	0	401.29	669.46	388.81	0	0	0	1.00:1.67:0.97:0:0:0	648.1	0	648.1	0	#DIV/0!	1.00:0	81890
1941	16470	| calpain-1 catalytic subunit | 823 | CAPN1 | 714 | P07384 | sp	NP_001185797	36.26	4	2	2		401.29	669.46	388.81	0	0	0	401.29	669.46	388.81	0	0	0	1.00:1.67:0.97:0:0:0	648.1	0	648.1	0	#DIV/0!	1.00:0	81890
1941	16471	| calpain-1 catalytic subunit isoform X1 | 823 | CAPN1 | 714 | P07384 | sp	XP_006718761	36.26	4	2	2		401.29	669.46	388.81	0	0	0	401.29	669.46	388.81	0	0	0	1.00:1.67:0.97:0:0:0	648.1	0	648.1	0	#DIV/0!	1.00:0	81890
1045	9405	| importin-9 | 55705 | IPO9 | 1041 | Q96P70 | sp	NP_060555	36.25	4	2	2	Acetylation (Protein N-term)	509.98	321.44	574.47	0	0	0	509.98	321.44	574.47	0	0	0	1.00:0.63:1.13:0:0:0	564.43	0	564.43	0	#DIV/0!	1.00:0	115963
920	2856	| microtubule-actin cross-linking factor 1 isoform X12 | 23499 | MACF1 | 7654 | nan | nan	XP_016856363	36.23	1	7	7		2329.5	1055	783.93	0	0	0	1210.8	727.44	783.93	0	0	0	1.00:0.60:0.65:0:0:0	2142.7	0	1014.5	0	#DIV/0!	1.00:0	865898
920	2857	| microtubule-actin cross-linking factor 1 isoform X11 | 23499 | MACF1 | 7657 | nan | nan	XP_006710585	36.23	1	7	7		2329.5	1055	783.93	0	0	0	1210.8	727.44	783.93	0	0	0	1.00:0.60:0.65:0:0:0	2142.7	0	1014.5	0	#DIV/0!	1.00:0	866242
920	2858	| microtubule-actin cross-linking factor 1 isoform X10 | 23499 | MACF1 | 7660 | nan | nan	XP_016856362	36.23	1	7	7		2329.5	1055	783.93	0	0	0	1210.8	727.44	783.93	0	0	0	1.00:0.60:0.65:0:0:0	2142.7	0	1014.5	0	#DIV/0!	1.00:0	866605
920	2859	| microtubule-actin cross-linking factor 1 isoform X9 | 23499 | MACF1 | 7663 | nan | nan	XP_005270755	36.23	1	7	7		2329.5	1055	783.93	0	0	0	1210.8	727.44	783.93	0	0	0	1.00:0.60:0.65:0:0:0	2142.7	0	1014.5	0	#DIV/0!	1.00:0	866949
920	2860	| microtubule-actin cross-linking factor 1 isoform X8 | 23499 | MACF1 | 7686 | nan | nan	XP_006710584	36.23	1	7	7		2329.5	1055	783.93	0	0	0	1210.8	727.44	783.93	0	0	0	1.00:0.60:0.65:0:0:0	2142.7	0	1014.5	0	#DIV/0!	1.00:0	869352
920	2861	| microtubule-actin cross-linking factor 1 isoform X7 | 23499 | MACF1 | 7694 | nan | nan	XP_005270754	36.23	1	7	7		2329.5	1055	783.93	0	0	0	1210.8	727.44	783.93	0	0	0	1.00:0.60:0.65:0:0:0	2142.7	0	1014.5	0	#DIV/0!	1.00:0	870409
920	2862	| microtubule-actin cross-linking factor 1 isoform X6 | 23499 | MACF1 | 7700 | nan | nan	XP_005270753	36.23	1	7	7		2329.5	1055	783.93	0	0	0	1210.8	727.44	783.93	0	0	0	1.00:0.60:0.65:0:0:0	2142.7	0	1014.5	0	#DIV/0!	1.00:0	871116
920	2863	| microtubule-actin cross-linking factor 1 isoform X4 | 23499 | MACF1 | 7705 | nan | nan	XP_011539443	36.23	1	7	7		2329.5	1055	783.93	0	0	0	1210.8	727.44	783.93	0	0	0	1.00:0.60:0.65:0:0:0	2142.7	0	1014.5	0	#DIV/0!	1.00:0	871501
920	2864	| microtubule-actin cross-linking factor 1 isoform X3 | 23499 | MACF1 | 7717 | nan | nan	XP_005270752	36.23	1	7	7		2329.5	1055	783.93	0	0	0	1210.8	727.44	783.93	0	0	0	1.00:0.60:0.65:0:0:0	2142.7	0	1014.5	0	#DIV/0!	1.00:0	872813
920	2865	| microtubule-actin cross-linking factor 1 isoform X2 | 23499 | MACF1 | 7720 | nan | nan	XP_006710582	36.23	1	7	7		2329.5	1055	783.93	0	0	0	1210.8	727.44	783.93	0	0	0	1.00:0.60:0.65:0:0:0	2142.7	0	1014.5	0	#DIV/0!	1.00:0	873176
920	2866	| microtubule-actin cross-linking factor 1 isoform X1 | 23499 | MACF1 | 7723 | nan | nan	XP_005270751	36.23	1	7	7		2329.5	1055	783.93	0	0	0	1210.8	727.44	783.93	0	0	0	1.00:0.60:0.65:0:0:0	2142.7	0	1014.5	0	#DIV/0!	1.00:0	873520
920	2873	| microtubule-actin cross-linking factor 1 isoform X23 | 23499 | MACF1 | 5656 | nan | nan	XP_006710599	36.23	2	7	7		2329.5	1055	783.93	0	0	0	1210.8	727.44	783.93	0	0	0	1.00:0.60:0.65:0:0:0	2142.7	0	1014.5	0	#DIV/0!	1.00:0	643399
920	2874	| microtubule-actin cross-linking factor 1 isoform X22 | 23499 | MACF1 | 5906 | nan | nan	XP_011539444	36.23	2	7	7		2329.5	1055	783.93	0	0	0	1210.8	727.44	783.93	0	0	0	1.00:0.60:0.65:0:0:0	2142.7	0	1014.5	0	#DIV/0!	1.00:0	672188
920	2900	| microtubule-actin cross-linking factor 1 isoform X16 | 23499 | MACF1 | 7553 | nan | nan	XP_006710598	36.23	1	7	7		2329.5	1055	783.93	0	0	0	1210.8	727.44	783.93	0	0	0	1.00:0.60:0.65:0:0:0	2142.7	0	1014.5	0	#DIV/0!	1.00:0	856819
920	2901	| microtubule-actin cross-linking factor 1 isoform X19 | 23499 | MACF1 | 7528 | nan | nan	XP_006710594	36.23	1	7	7		2329.5	1055	783.93	0	0	0	1210.8	727.44	783.93	0	0	0	1.00:0.60:0.65:0:0:0	2142.7	0	1014.5	0	#DIV/0!	1.00:0	853907
920	2902	| microtubule-actin cross-linking factor 1 isoform X27 | 23499 | MACF1 | 7500 | nan | nan	XP_024301882	36.23	1	7	7		2329.5	1055	783.93	0	0	0	1210.8	727.44	783.93	0	0	0	1.00:0.60:0.65:0:0:0	2142.7	0	1014.5	0	#DIV/0!	1.00:0	850910
920	2903	| microtubule-actin cross-linking factor 1 isoform X20 | 23499 | MACF1 | 7503 | nan | nan	XP_016856367	36.23	1	7	7		2329.5	1055	783.93	0	0	0	1210.8	727.44	783.93	0	0	0	1.00:0.60:0.65:0:0:0	2142.7	0	1014.5	0	#DIV/0!	1.00:0	850794
920	2904	| microtubule-actin cross-linking factor 1 isoform X20 | 23499 | MACF1 | 7503 | nan | nan	XP_016856366	36.23	1	7	7		2329.5	1055	783.93	0	0	0	1210.8	727.44	783.93	0	0	0	1.00:0.60:0.65:0:0:0	2142.7	0	1014.5	0	#DIV/0!	1.00:0	850794
920	2905	| microtubule-actin cross-linking factor 1 isoform X18 | 23499 | MACF1 | 7539 | nan | nan	XP_006710593	36.23	1	7	7		2329.5	1055	783.93	0	0	0	1210.8	727.44	783.93	0	0	0	1.00:0.60:0.65:0:0:0	2142.7	0	1014.5	0	#DIV/0!	1.00:0	855290
920	2906	| microtubule-actin cross-linking factor 1 isoform X17 | 23499 | MACF1 | 7544 | nan | nan	XP_006710592	36.23	1	7	7		2329.5	1055	783.93	0	0	0	1210.8	727.44	783.93	0	0	0	1.00:0.60:0.65:0:0:0	2142.7	0	1014.5	0	#DIV/0!	1.00:0	855918
920	2907	| microtubule-actin cross-linking factor 1 isoform X15 | 23499 | MACF1 | 7558 | nan | nan	XP_006710591	36.23	1	7	7		2329.5	1055	783.93	0	0	0	1210.8	727.44	783.93	0	0	0	1.00:0.60:0.65:0:0:0	2142.7	0	1014.5	0	#DIV/0!	1.00:0	857237
920	2908	| microtubule-actin cross-linking factor 1 isoform X13 | 23499 | MACF1 | 7563 | nan | nan	XP_016856364	36.23	1	7	7		2329.5	1055	783.93	0	0	0	1210.8	727.44	783.93	0	0	0	1.00:0.60:0.65:0:0:0	2142.7	0	1014.5	0	#DIV/0!	1.00:0	857825
920	2909	| microtubule-actin cross-linking factor 1 isoform X14 | 23499 | MACF1 | 7595 | nan | nan	XP_006710589	36.23	1	7	7		2329.5	1055	783.93	0	0	0	1210.8	727.44	783.93	0	0	0	1.00:0.60:0.65:0:0:0	2142.7	0	1014.5	0	#DIV/0!	1.00:0	861437
920	2948	| microtubule-actin cross-linking factor 1 | 23499 | MACF1 | 5430 | Q9UPN3 | sp	NP_036222	36.23	2	7	7		2329.5	1055	783.93	0	0	0	1210.8	727.44	783.93	0	0	0	1.00:0.60:0.65:0:0:0	2142.7	0	1014.5	0	#DIV/0!	1.00:0	620426
920	2949	| microtubule-actin cross-linking factor 1 isoform X28 | 23499 | MACF1 | 5433 | nan | nan	XP_024301884	36.23	2	7	7		2329.5	1055	783.93	0	0	0	1210.8	727.44	783.93	0	0	0	1.00:0.60:0.65:0:0:0	2142.7	0	1014.5	0	#DIV/0!	1.00:0	620789
920	2950	| microtubule-actin cross-linking factor 1 isoform X25 | 23499 | MACF1 | 5496 | nan | nan	XP_016856370	36.23	2	7	7		2329.5	1055	783.93	0	0	0	1210.8	727.44	783.93	0	0	0	1.00:0.60:0.65:0:0:0	2142.7	0	1014.5	0	#DIV/0!	1.00:0	627704
394	2537	| tubulin beta-6 chain isoform 1 | 84617 | TUBB6 | 446 | Q9BUF5 | sp	NP_115914	36.21	3	1	1		431.68	231.3	257.51	0	0	0	431.68	231.3	257.51	0	0	0	1.00:0.54:0.60:0:0:0	306.83	0	306.83	0	#DIV/0!	1.00:0	49857
394	2538	| tubulin beta-6 chain isoform 1 | 84617 | TUBB6 | 446 | Q9BUF5 | sp	NP_001290453	36.21	3	1	1		431.68	231.3	257.51	0	0	0	431.68	231.3	257.51	0	0	0	1.00:0.54:0.60:0:0:0	306.83	0	306.83	0	#DIV/0!	1.00:0	49857
1846	14956	| round spermatid basic protein 1-like protein | 222194 | RSBN1L | 846 | Q6PCB5 | sp	NP_940869	36.15	3	2	2		639.88	713.09	410.49	0	0	0	639.88	713.09	410.49	0	0	0	1.00:1.11:0.64:0:0:0	709.02	0	709.02	0	#DIV/0!	1.00:0	94870
1305	5372	| ubiquitin carboxyl-terminal hydrolase 4 isoform b | 7375 | USP4 | 916 | Q13107 | sp	NP_955475	36.14	5	3	3		338.64	418.07	1122.1	0	0	0	338.64	418.07	1122.1	0	0	0	1.00:1.23:3.31:0:0:0	1180.9	0	1180.9	0	#DIV/0!	1.00:0	103958
1305	5373	| ubiquitin carboxyl-terminal hydrolase 4 isoform a | 7375 | USP4 | 963 | Q13107 | sp	NP_003354	36.14	5	3	3		338.64	418.07	1122.1	0	0	0	338.64	418.07	1122.1	0	0	0	1.00:1.23:3.31:0:0:0	1180.9	0	1180.9	0	#DIV/0!	1.00:0	108565
2140	24893	| E3 SUMO-protein ligase PIAS2 isoform 6 | 9063 | PIAS2 | 612 | nan | nan	NP_001340965	36.12	2	1	1		663.54	404.49	383.98	0	0	0	663.54	404.49	383.98	0	0	0	1.00:0.61:0.58:0:0:0	484	0	484	0	#DIV/0!	1.00:0	67134
2140	24894	| E3 SUMO-protein ligase PIAS2 isoform 6 | 9063 | PIAS2 | 612 | nan | nan	NP_001340964	36.12	2	1	1		663.54	404.49	383.98	0	0	0	663.54	404.49	383.98	0	0	0	1.00:0.61:0.58:0:0:0	484	0	484	0	#DIV/0!	1.00:0	67134
2140	24895	| E3 SUMO-protein ligase PIAS2 isoform X5 | 9063 | PIAS2 | 612 | nan | nan	XP_024307050	36.12	2	1	1		663.54	404.49	383.98	0	0	0	663.54	404.49	383.98	0	0	0	1.00:0.61:0.58:0:0:0	484	0	484	0	#DIV/0!	1.00:0	67134
2140	24896	| E3 SUMO-protein ligase PIAS2 isoform 5 | 9063 | PIAS2 | 613 | nan | nan	NP_001340968	36.12	2	1	1		663.54	404.49	383.98	0	0	0	663.54	404.49	383.98	0	0	0	1.00:0.61:0.58:0:0:0	484	0	484	0	#DIV/0!	1.00:0	67262
2140	27725	| E3 SUMO-protein ligase PIAS2 isoform NY | 9063 | PIAS2 | 405 | O75928 | sp	NP_001310989	36.12	4	1	1		663.54	404.49	383.98	0	0	0	663.54	404.49	383.98	0	0	0	1.00:0.61:0.58:0:0:0	484	0	484	0	#DIV/0!	1.00:0	45057
2140	27726	| E3 SUMO-protein ligase PIAS1 isoform X6 | 8554 | PIAS1 | 467 | nan | nan	XP_024305862	36.12	3	1	1		663.54	404.49	383.98	0	0	0	663.54	404.49	383.98	0	0	0	1.00:0.61:0.58:0:0:0	484	0	484	0	#DIV/0!	1.00:0	51396
2140	27727	| E3 SUMO-protein ligase PIAS2 isoform 8 | 9063 | PIAS2 | 498 | nan | nan	NP_001310984	36.12	3	1	1		663.54	404.49	383.98	0	0	0	663.54	404.49	383.98	0	0	0	1.00:0.61:0.58:0:0:0	484	0	484	0	#DIV/0!	1.00:0	55285
2140	27728	| E3 SUMO-protein ligase PIAS2 isoform 8 | 9063 | PIAS2 | 498 | nan | nan	NP_001310986	36.12	3	1	1		663.54	404.49	383.98	0	0	0	663.54	404.49	383.98	0	0	0	1.00:0.61:0.58:0:0:0	484	0	484	0	#DIV/0!	1.00:0	55285
2140	27729	| E3 SUMO-protein ligase PIAS2 isoform 8 | 9063 | PIAS2 | 498 | nan | nan	NP_001310988	36.12	3	1	1		663.54	404.49	383.98	0	0	0	663.54	404.49	383.98	0	0	0	1.00:0.61:0.58:0:0:0	484	0	484	0	#DIV/0!	1.00:0	55285
2140	27730	| E3 SUMO-protein ligase PIAS2 isoform 8 | 9063 | PIAS2 | 498 | nan | nan	NP_001340966	36.12	3	1	1		663.54	404.49	383.98	0	0	0	663.54	404.49	383.98	0	0	0	1.00:0.61:0.58:0:0:0	484	0	484	0	#DIV/0!	1.00:0	55285
2140	27731	| E3 SUMO-protein ligase PIAS2 isoform X10 | 9063 | PIAS2 | 503 | nan | nan	XP_024307054	36.12	3	1	1		663.54	404.49	383.98	0	0	0	663.54	404.49	383.98	0	0	0	1.00:0.61:0.58:0:0:0	484	0	484	0	#DIV/0!	1.00:0	55832
2140	27732	| E3 SUMO-protein ligase PIAS2 isoform X9 | 9063 | PIAS2 | 512 | nan | nan	XP_024307053	36.12	3	1	1		663.54	404.49	383.98	0	0	0	663.54	404.49	383.98	0	0	0	1.00:0.61:0.58:0:0:0	484	0	484	0	#DIV/0!	1.00:0	56938
2140	27733	| E3 SUMO-protein ligase PIAS2 isoform X8 | 9063 | PIAS2 | 551 | nan | nan	XP_024307052	36.12	3	1	1		663.54	404.49	383.98	0	0	0	663.54	404.49	383.98	0	0	0	1.00:0.61:0.58:0:0:0	484	0	484	0	#DIV/0!	1.00:0	61284
2140	27734	| E3 SUMO-protein ligase PIAS2 isoform X8 | 9063 | PIAS2 | 551 | nan | nan	XP_024307051	36.12	3	1	1		663.54	404.49	383.98	0	0	0	663.54	404.49	383.98	0	0	0	1.00:0.61:0.58:0:0:0	484	0	484	0	#DIV/0!	1.00:0	61284
2140	27740	| E3 SUMO-protein ligase PIAS2 isoform 7 | 9063 | PIAS2 | 563 | nan | nan	NP_001340962	36.12	3	1	1		663.54	404.49	383.98	0	0	0	663.54	404.49	383.98	0	0	0	1.00:0.61:0.58:0:0:0	484	0	484	0	#DIV/0!	1.00:0	62290
2140	27741	| E3 SUMO-protein ligase PIAS2 isoform 7 | 9063 | PIAS2 | 563 | nan | nan	NP_001310980	36.12	3	1	1		663.54	404.49	383.98	0	0	0	663.54	404.49	383.98	0	0	0	1.00:0.61:0.58:0:0:0	484	0	484	0	#DIV/0!	1.00:0	62290
2140	27742	| E3 SUMO-protein ligase PIAS2 isoform 7 | 9063 | PIAS2 | 563 | nan | nan	NP_001310982	36.12	3	1	1		663.54	404.49	383.98	0	0	0	663.54	404.49	383.98	0	0	0	1.00:0.61:0.58:0:0:0	484	0	484	0	#DIV/0!	1.00:0	62290
2140	27743	| E3 SUMO-protein ligase PIAS2 isoform 7 | 9063 | PIAS2 | 563 | nan | nan	NP_001310981	36.12	3	1	1		663.54	404.49	383.98	0	0	0	663.54	404.49	383.98	0	0	0	1.00:0.61:0.58:0:0:0	484	0	484	0	#DIV/0!	1.00:0	62290
2140	27744	| E3 SUMO-protein ligase PIAS2 isoform X7 | 9063 | PIAS2 | 563 | nan | nan	XP_016881561	36.12	3	1	1		663.54	404.49	383.98	0	0	0	663.54	404.49	383.98	0	0	0	1.00:0.61:0.58:0:0:0	484	0	484	0	#DIV/0!	1.00:0	62290
2140	27745	| E3 SUMO-protein ligase PIAS2 isoform 7 | 9063 | PIAS2 | 563 | nan | nan	NP_001310983	36.12	3	1	1		663.54	404.49	383.98	0	0	0	663.54	404.49	383.98	0	0	0	1.00:0.61:0.58:0:0:0	484	0	484	0	#DIV/0!	1.00:0	62290
2140	27747	| E3 SUMO-protein ligase PIAS2 isoform 4 | 9063 | PIAS2 | 571 | nan | nan	NP_001310975	36.12	3	1	1		663.54	404.49	383.98	0	0	0	663.54	404.49	383.98	0	0	0	1.00:0.61:0.58:0:0:0	484	0	484	0	#DIV/0!	1.00:0	63225
2140	27750	| E3 SUMO-protein ligase PIAS2 isoform X6 | 9063 | PIAS2 | 611 | nan | nan	XP_006722636	36.12	2	1	1		663.54	404.49	383.98	0	0	0	663.54	404.49	383.98	0	0	0	1.00:0.61:0.58:0:0:0	484	0	484	0	#DIV/0!	1.00:0	67742
1592	12290	| WD repeat-containing protein 5 isoform X1 | 11091 | WDR5 | 334 | P61964 | sp	XP_005272220	36.11	17	4	4	Carbamidomethylation	1837.6	942.21	1877.1	0	0	0	1486.6	942.21	1464.7	0	0	0	1.00:0.63:0.99:0:0:0	1679.5	0	1297.8	0	#DIV/0!	1.00:0	36589
1592	12291	| WD repeat-containing protein 5 | 11091 | WDR5 | 334 | P61964 | sp	NP_060058	36.11	17	4	4	Carbamidomethylation	1837.6	942.21	1877.1	0	0	0	1486.6	942.21	1464.7	0	0	0	1.00:0.63:0.99:0:0:0	1679.5	0	1297.8	0	#DIV/0!	1.00:0	36589
1592	12292	| WD repeat-containing protein 5 | 11091 | WDR5 | 334 | P61964 | sp	NP_438172	36.11	17	4	4	Carbamidomethylation	1837.6	942.21	1877.1	0	0	0	1486.6	942.21	1464.7	0	0	0	1.00:0.63:0.99:0:0:0	1679.5	0	1297.8	0	#DIV/0!	1.00:0	36589
1592	12293	| WD repeat-containing protein 5 isoform X1 | 11091 | WDR5 | 334 | nan | nan	XP_024303163	36.11	17	4	4	Carbamidomethylation	1837.6	942.21	1877.1	0	0	0	1486.6	942.21	1464.7	0	0	0	1.00:0.63:0.99:0:0:0	1679.5	0	1297.8	0	#DIV/0!	1.00:0	36589
1592	12294	| WD repeat-containing protein 5 isoform X1 | 11091 | WDR5 | 334 | nan | nan	XP_024303162	36.11	17	4	4	Carbamidomethylation	1837.6	942.21	1877.1	0	0	0	1486.6	942.21	1464.7	0	0	0	1.00:0.63:0.99:0:0:0	1679.5	0	1297.8	0	#DIV/0!	1.00:0	36589
1592	12295	| WD repeat-containing protein 5 isoform X1 | 11091 | WDR5 | 334 | nan | nan	XP_024303161	36.11	17	4	4	Carbamidomethylation	1837.6	942.21	1877.1	0	0	0	1486.6	942.21	1464.7	0	0	0	1.00:0.63:0.99:0:0:0	1679.5	0	1297.8	0	#DIV/0!	1.00:0	36589
602	3247	| nibrin isoform 1 | 4683 | NBN | 754 | O60934 | sp	NP_002476	36.1	13	7	7		3446.3	3490.8	4760.7	0	0	0	1692.9	2081.9	2743.8	0	0	0	1.00:1.23:1.62:0:0:0	4142.5	0	2416.1	0	#DIV/0!	1.00:0	84959
726	2887	| alanine--tRNA ligase mitochondrial | 57505 | AARS2 | 985 | Q5JTZ9 | sp	NP_065796	36.09	10	8	8		3711.4	3012.5	3869	0	0	0	1829	1423.2	2331.4	0	0	0	1.00:0.78:1.27:0:0:0	3947.5	0	1861.2	0	#DIV/0!	1.00:0	107326
726	2888	| alanine--tRNA ligase mitochondrial isoform X1 | 57505 | AARS2 | 955 | nan | nan	XP_011513066	36.09	11	8	8		3711.4	3012.5	3869	0	0	0	1829	1423.2	2331.4	0	0	0	1.00:0.78:1.27:0:0:0	3947.5	0	1861.2	0	#DIV/0!	1.00:0	104869
364	3704	| cytosolic acyl coenzyme A thioester hydrolase isoform hBACHb | 11332 | ACOT7 | 380 | O00154 | sp	NP_863654	36.07	42	13	13	Carbamidomethylation; Oxidation (M)	33991	30489	35707	3478.4	3199.3	5432.1	17804	17511	21071	2221.5	2103.8	2910.3	1.00:0.98:1.18:0.12:0.12:0.16	34042	4730.3	18795	2411.9	7.79261	1.00:0.13	41796
1544	13500	| RAD50-interacting protein 1 isoform 1 | 60561 | RINT1 | 792 | Q6NUQ1 | sp	NP_068749	36	4	2	2		807.23	258.76	772.51	0	0	0	807.23	258.76	772.51	0	0	0	1.00:0.32:0.96:0:0:0	721.63	0	721.63	0	#DIV/0!	1.00:0	90632
1544	13501	| RAD50-interacting protein 1 isoform X1 | 60561 | RINT1 | 816 | nan | nan	XP_024302623	36	3	2	2		807.23	258.76	772.51	0	0	0	807.23	258.76	772.51	0	0	0	1.00:0.32:0.96:0:0:0	721.63	0	721.63	0	#DIV/0!	1.00:0	93487
1348	12204	| rhomboid domain-containing protein 2 isoform a | 57414 | RHBDD2 | 364 | Q6NTF9 | sp	NP_001035546	35.99	9	2	2		1401.8	1444.4	2186	0	0	0	1401.8	1444.4	2186	0	0	0	1.00:1.03:1.56:0:0:0	1677.4	0	1677.4	0	#DIV/0!	1.00:0	39202
1247	7126	| CDK5 regulatory subunit-associated protein 2 isoform b | 55755 | CDK5RAP2 | 1814 | Q96SN8 | sp	NP_001011649	35.96	4	4	4	Carbamidomethylation	623.62	573.16	1202.6	0	0	0	623.62	573.16	964.24	0	0	0	1.00:0.92:1.55:0:0:0	1142.5	0	904.13	0	#DIV/0!	1.00:0	206321
1247	7137	| CDK5 regulatory subunit-associated protein 2 isoform X3 | 55755 | CDK5RAP2 | 1860 | nan | nan	XP_016870410	35.96	4	4	4	Carbamidomethylation	623.62	573.16	1202.6	0	0	0	623.62	573.16	964.24	0	0	0	1.00:0.92:1.55:0:0:0	1142.5	0	904.13	0	#DIV/0!	1.00:0	211250
1247	7138	| CDK5 regulatory subunit-associated protein 2 isoform X2 | 55755 | CDK5RAP2 | 1861 | Q96SN8 | sp	XP_006717245	35.96	4	4	4	Carbamidomethylation	623.62	573.16	1202.6	0	0	0	623.62	573.16	964.24	0	0	0	1.00:0.92:1.55:0:0:0	1142.5	0	904.13	0	#DIV/0!	1.00:0	211379
1247	7139	| CDK5 regulatory subunit-associated protein 2 isoform X1 | 55755 | CDK5RAP2 | 1892 | nan | nan	XP_011517162	35.96	4	4	4	Carbamidomethylation	623.62	573.16	1202.6	0	0	0	623.62	573.16	964.24	0	0	0	1.00:0.92:1.55:0:0:0	1142.5	0	904.13	0	#DIV/0!	1.00:0	214907
1247	7140	| CDK5 regulatory subunit-associated protein 2 isoform a | 55755 | CDK5RAP2 | 1893 | Q96SN8 | sp	NP_060719	35.96	4	4	4	Carbamidomethylation	623.62	573.16	1202.6	0	0	0	623.62	573.16	964.24	0	0	0	1.00:0.92:1.55:0:0:0	1142.5	0	904.13	0	#DIV/0!	1.00:0	215036
1247	7141	| CDK5 regulatory subunit-associated protein 2 isoform X6 | 55755 | CDK5RAP2 | 1585 | nan | nan	XP_016870412	35.96	4	4	4	Carbamidomethylation	623.62	573.16	1202.6	0	0	0	623.62	573.16	964.24	0	0	0	1.00:0.92:1.55:0:0:0	1142.5	0	904.13	0	#DIV/0!	1.00:0	181047
1247	7148	| CDK5 regulatory subunit-associated protein 2 isoform c | 55755 | CDK5RAP2 | 1663 | Q96SN8 | sp	NP_001258968	35.96	4	4	4	Carbamidomethylation	623.62	573.16	1202.6	0	0	0	623.62	573.16	964.24	0	0	0	1.00:0.92:1.55:0:0:0	1142.5	0	904.13	0	#DIV/0!	1.00:0	189633
1247	7149	| CDK5 regulatory subunit-associated protein 2 isoform X4 | 55755 | CDK5RAP2 | 1664 | nan | nan	XP_006717248	35.96	4	4	4	Carbamidomethylation	623.62	573.16	1202.6	0	0	0	623.62	573.16	964.24	0	0	0	1.00:0.92:1.55:0:0:0	1142.5	0	904.13	0	#DIV/0!	1.00:0	189762
652	6589	| sentrin-specific protease 3 | 26168 | SENP3 | 574 | Q9H4L4 | sp	NP_056485	35.95	17	6	6	Carbamidomethylation	4809	3414.7	5610.3	0	0	0	3616.9	2363.5	3386.2	0	0	0	1.00:0.65:0.94:0:0:0	5183	0	3122.2	0	#DIV/0!	1.00:0	65010
626	4941	| general transcription factor 3C polypeptide 5 isoform 2 | 9328 | GTF3C5 | 519 | Q9Y5Q8 | sp	NP_036219	35.94	20	7	7	Carbamidomethylation; Acetylation (Protein N-term)	2860.7	1891.6	3815.8	0	0	0	1891.3	1331.2	2134.1	0	0	0	1.00:0.70:1.13:0:0:0	3649.2	0	1785.6	0	#DIV/0!	1.00:0	59571
626	4942	| general transcription factor 3C polypeptide 5 isoform 1 | 9328 | GTF3C5 | 526 | Q9Y5Q8 | sp	NP_001116295	35.94	20	7	7	Carbamidomethylation; Acetylation (Protein N-term)	2860.7	1891.6	3815.8	0	0	0	1891.3	1331.2	2134.1	0	0	0	1.00:0.70:1.13:0:0:0	3649.2	0	1785.6	0	#DIV/0!	1.00:0	60369
1132	8506	| deaminated glutathione amidase isoform 3 | 4817 | NIT1 | 312 | Q86X76 | sp	NP_001172022	35.92	19	4	4	Carbamidomethylation	2661.3	1649.1	2409.9	0	0	0	2661.3	1649.1	2059.4	0	0	0	1.00:0.62:0.77:0:0:0	2718.3	0	2367.8	0	#DIV/0!	1.00:0	34323
1132	9124	| deaminated glutathione amidase isoform 4 | 4817 | NIT1 | 291 | Q86X76 | sp	NP_001172023	35.92	20	4	4	Carbamidomethylation	2661.3	1649.1	2409.9	0	0	0	2661.3	1649.1	2059.4	0	0	0	1.00:0.62:0.77:0:0:0	2718.3	0	2367.8	0	#DIV/0!	1.00:0	31859
1132	9125	| deaminated glutathione amidase isoform X3 | 4817 | NIT1 | 291 | Q86X76 | sp	XP_005245273	35.92	20	4	4	Carbamidomethylation	2661.3	1649.1	2409.9	0	0	0	2661.3	1649.1	2059.4	0	0	0	1.00:0.62:0.77:0:0:0	2718.3	0	2367.8	0	#DIV/0!	1.00:0	31859
1132	9126	| deaminated glutathione amidase isoform 1 | 4817 | NIT1 | 327 | Q86X76 | sp	NP_005591	35.92	18	4	4	Carbamidomethylation	2661.3	1649.1	2409.9	0	0	0	2661.3	1649.1	2059.4	0	0	0	1.00:0.62:0.77:0:0:0	2718.3	0	2367.8	0	#DIV/0!	1.00:0	35896
1132	9127	| deaminated glutathione amidase isoform X1 | 4817 | NIT1 | 344 | nan | nan	XP_005245271	35.92	17	4	4	Carbamidomethylation	2661.3	1649.1	2409.9	0	0	0	2661.3	1649.1	2059.4	0	0	0	1.00:0.62:0.77:0:0:0	2718.3	0	2367.8	0	#DIV/0!	1.00:0	37906
1132	9128	| deaminated glutathione amidase isoform X2 | 4817 | NIT1 | 344 | nan | nan	XP_005245272	35.92	17	4	4	Carbamidomethylation	2661.3	1649.1	2409.9	0	0	0	2661.3	1649.1	2059.4	0	0	0	1.00:0.62:0.77:0:0:0	2718.3	0	2367.8	0	#DIV/0!	1.00:0	37844
877	8463	| prefoldin subunit 3 isoform 1 | 7411 | VBP1 | 197 | P61758 | sp	NP_003363	35.91	22	4	4	Carbamidomethylation	2588.8	3985.9	3580.8	0	0	0	2238.3	3523.3	3003.2	0	0	0	1.00:1.57:1.34:0:0:0	3851.8	0	3388.2	0	#DIV/0!	1.00:0	22626
877	8692	| prefoldin subunit 3 isoform 2 | 7411 | VBP1 | 233 | P61758 | sp	NP_001290472	35.91	19	4	4	Carbamidomethylation	2588.8	3985.9	3580.8	0	0	0	2238.3	3523.3	3003.2	0	0	0	1.00:1.57:1.34:0:0:0	3851.8	0	3388.2	0	#DIV/0!	1.00:0	26535
170	1268	| ATPase family AAA domain-containing protein 3A isoform 2 | 55210 | ATAD3A | 586 | Q9NVI7 | sp	NP_001164006	35.86	8	3	3		3914	2714.6	4073.5	0	0	0	3914	2714.6	4073.5	0	0	0	1.00:0.69:1.04:0:0:0	3567.4	0	3567.4	0	#DIV/0!	1.00:0	66218
170	1276	| ATPase family AAA domain-containing protein 3A isoform X1 | 55210 | ATAD3A | 612 | nan | nan	XP_024303866	35.86	8	3	3		3914	2714.6	4073.5	0	0	0	3914	2714.6	4073.5	0	0	0	1.00:0.69:1.04:0:0:0	3567.4	0	3567.4	0	#DIV/0!	1.00:0	68979
1827	13270	| hsp70-binding protein 1 isoform 1 | 23640 | HSPBP1 | 405 | Q9NZL4 | sp	NP_001284529	35.85	11	3	3	Carbamidomethylation	1436.7	380.48	638.91	0	0	0	1436.7	380.48	638.91	0	0	0	1.00:0.26:0.44:0:0:0	1373.1	0	1373.1	0	#DIV/0!	1.00:0	44474
1827	13752	| hsp70-binding protein 1 isoform X2 | 23640 | HSPBP1 | 359 | nan | nan	XP_024307205	35.85	12	3	3	Carbamidomethylation	1436.7	380.48	638.91	0	0	0	1436.7	380.48	638.91	0	0	0	1.00:0.26:0.44:0:0:0	1373.1	0	1373.1	0	#DIV/0!	1.00:0	39303
1827	13753	| hsp70-binding protein 1 isoform X2 | 23640 | HSPBP1 | 359 | Q9NZL4 | sp	XP_016882033	35.85	12	3	3	Carbamidomethylation	1436.7	380.48	638.91	0	0	0	1436.7	380.48	638.91	0	0	0	1.00:0.26:0.44:0:0:0	1373.1	0	1373.1	0	#DIV/0!	1.00:0	39303
1827	13754	| hsp70-binding protein 1 isoform 2 | 23640 | HSPBP1 | 359 | Q9NZL4 | sp	NP_001123578	35.85	12	3	3	Carbamidomethylation	1436.7	380.48	638.91	0	0	0	1436.7	380.48	638.91	0	0	0	1.00:0.26:0.44:0:0:0	1373.1	0	1373.1	0	#DIV/0!	1.00:0	39303
1827	13755	| hsp70-binding protein 1 isoform 2 | 23640 | HSPBP1 | 359 | Q9NZL4 | sp	NP_036399	35.85	12	3	3	Carbamidomethylation	1436.7	380.48	638.91	0	0	0	1436.7	380.48	638.91	0	0	0	1.00:0.26:0.44:0:0:0	1373.1	0	1373.1	0	#DIV/0!	1.00:0	39303
62	298	| monofunctional C1-tetrahydrofolate synthase mitochondrial isoform | 25902 | MTHFD1L | 921 | nan | nan	XP_011534032	35.79	29	21	21	Carbamidomethylation	33020	29971	38975	2122	1623.8	3139	9177.7	7721.8	9821.4	1357.5	1309	963.11	1.00:0.84:1.07:0.15:0.14:0.10	34993	3601.3	8907	1387	6.42177	1.00:0.16	100238
62	321	| monofunctional C1-tetrahydrofolate synthase mitochondrial isoform | 25902 | MTHFD1L | 955 | nan | nan	XP_011534031	35.79	28	21	21	Carbamidomethylation	33020	29971	38975	2122	1623.8	3139	9177.7	7721.8	9821.4	1357.5	1309	963.11	1.00:0.84:1.07:0.15:0.14:0.10	34993	3601.3	8907	1387	6.42177	1.00:0.16	103128
62	340	| monofunctional C1-tetrahydrofolate synthase mitochondrial isoform | 25902 | MTHFD1L | 913 | Q6UB35 | sp	NP_001229697	35.79	30	21	21	Carbamidomethylation	33020	29971	38975	2122	1623.8	3139	9177.7	7721.8	9821.4	1357.5	1309	963.11	1.00:0.84:1.07:0.15:0.14:0.10	34993	3601.3	8907	1387	6.42177	1.00:0.16	99312
62	359	| monofunctional C1-tetrahydrofolate synthase mitochondrial isoform | 25902 | MTHFD1L | 920 | nan | nan	XP_011534033	35.79	29	21	21	Carbamidomethylation	33020	29971	38975	2122	1623.8	3139	9177.7	7721.8	9821.4	1357.5	1309	963.11	1.00:0.84:1.07:0.15:0.14:0.10	34993	3601.3	8907	1387	6.42177	1.00:0.16	100139
62	366	| monofunctional C1-tetrahydrofolate synthase mitochondrial isoform | 25902 | MTHFD1L | 979 | Q6UB35 | sp	NP_001229696	35.79	28	21	21	Carbamidomethylation	33020	29971	38975	2122	1623.8	3139	9177.7	7721.8	9821.4	1357.5	1309	963.11	1.00:0.84:1.07:0.15:0.14:0.10	34993	3601.3	8907	1387	6.42177	1.00:0.16	105889
62	367	| monofunctional C1-tetrahydrofolate synthase mitochondrial isoform | 25902 | MTHFD1L | 979 | B7ZM99 | tr	XP_016866192	35.79	28	21	21	Carbamidomethylation	33020	29971	38975	2122	1623.8	3139	9177.7	7721.8	9821.4	1357.5	1309	963.11	1.00:0.84:1.07:0.15:0.14:0.10	34993	3601.3	8907	1387	6.42177	1.00:0.16	105889
62	368	| monofunctional C1-tetrahydrofolate synthase mitochondrial isoform | 25902 | MTHFD1L | 979 | B7ZM99 | tr	XP_016866191	35.79	28	21	21	Carbamidomethylation	33020	29971	38975	2122	1623.8	3139	9177.7	7721.8	9821.4	1357.5	1309	963.11	1.00:0.84:1.07:0.15:0.14:0.10	34993	3601.3	8907	1387	6.42177	1.00:0.16	105889
62	390	| monofunctional C1-tetrahydrofolate synthase mitochondrial isoform | 25902 | MTHFD1L | 986 | nan | nan	XP_005266964	35.79	27	21	21	Carbamidomethylation	33020	29971	38975	2122	1623.8	3139	9177.7	7721.8	9821.4	1357.5	1309	963.11	1.00:0.84:1.07:0.15:0.14:0.10	34993	3601.3	8907	1387	6.42177	1.00:0.16	106716
62	401	| monofunctional C1-tetrahydrofolate synthase mitochondrial isoform | 25902 | MTHFD1L | 912 | nan | nan	NP_001337415	35.79	30	21	21	Carbamidomethylation	33020	29971	38975	2122	1623.8	3139	9177.7	7721.8	9821.4	1357.5	1309	963.11	1.00:0.84:1.07:0.15:0.14:0.10	34993	3601.3	8907	1387	6.42177	1.00:0.16	99212
62	411	| monofunctional C1-tetrahydrofolate synthase mitochondrial isoform | 25902 | MTHFD1L | 978 | Q6UB35 | sp	NP_056255	35.79	28	21	21	Carbamidomethylation	33020	29971	38975	2122	1623.8	3139	9177.7	7721.8	9821.4	1357.5	1309	963.11	1.00:0.84:1.07:0.15:0.14:0.10	34993	3601.3	8907	1387	6.42177	1.00:0.16	105790
62	452	| monofunctional C1-tetrahydrofolate synthase mitochondrial isoform | 25902 | MTHFD1L | 943 | nan | nan	XP_024302163	35.79	29	21	21	Carbamidomethylation	33020	29971	38975	2122	1623.8	3139	9177.7	7721.8	9821.4	1357.5	1309	963.11	1.00:0.84:1.07:0.15:0.14:0.10	34993	3601.3	8907	1387	6.42177	1.00:0.16	102651
627	3703	| methionine aminopeptidase 2 isoform 1 | 10988 | METAP2 | 478 | P50579 | sp	NP_006829	35.78	20	7	7	Carbamidomethylation	4112.2	3172.7	4307.6	0	0	0	3042	1938.5	2185.1	0	0	0	1.00:0.64:0.72:0:0:0	4231.2	0	2388.5	0	#DIV/0!	1.00:0	52892
1225	7764	| H/ACA ribonucleoprotein complex subunit 4 isoform 2 | 1736 | DKC1 | 509 | O60832 | sp	NP_001135935	35.77	6	2	2		491.28	705.3	847.37	0	0	0	491.28	705.3	847.37	0	0	0	1.00:1.44:1.72:0:0:0	827.06	0	827.06	0	#DIV/0!	1.00:0	57033
1225	7765	| H/ACA ribonucleoprotein complex subunit 4 isoform 1 | 1736 | DKC1 | 514 | O60832 | sp	NP_001354	35.77	6	2	2		491.28	705.3	847.37	0	0	0	491.28	705.3	847.37	0	0	0	1.00:1.44:1.72:0:0:0	827.06	0	827.06	0	#DIV/0!	1.00:0	57674
1225	7829	| H/ACA ribonucleoprotein complex subunit 4 isoform 3 | 1736 | DKC1 | 420 | O60832 | sp	NP_001275676	35.77	8	2	2		491.28	705.3	847.37	0	0	0	491.28	705.3	847.37	0	0	0	1.00:1.44:1.72:0:0:0	827.06	0	827.06	0	#DIV/0!	1.00:0	47603
1059	5724	| ATP-dependent RNA helicase DHX36 isoform 2 | 170506 | DHX36 | 994 | Q9H2U1 | sp	NP_001107869	35.76	4	2	2	Carbamidomethylation	645.95	610.99	1005.6	0	0	0	645.95	610.99	1005.6	0	0	0	1.00:0.95:1.56:0:0:0	973.46	0	973.46	0	#DIV/0!	1.00:0	113153
1059	5725	| ATP-dependent RNA helicase DHX36 isoform 1 | 170506 | DHX36 | 1008 | Q9H2U1 | sp	NP_065916	35.76	4	2	2	Carbamidomethylation	645.95	610.99	1005.6	0	0	0	645.95	610.99	1005.6	0	0	0	1.00:0.95:1.56:0:0:0	973.46	0	973.46	0	#DIV/0!	1.00:0	114760
1377	9343	| DNA polymerase alpha catalytic subunit isoform 2 | 5422 | POLA1 | 1462 | P09884 | sp	NP_058633	35.76	4	4	4	Carbamidomethylation	773.16	1263.4	1780.4	0	0	0	773.16	1263.4	1142.7	0	0	0	1.00:1.63:1.48:0:0:0	1848.5	0	1210.8	0	#DIV/0!	1.00:0	165912
1377	9430	| DNA polymerase alpha catalytic subunit isoform X2 | 5422 | POLA1 | 1432 | nan | nan	XP_016885084	35.76	4	4	4	Carbamidomethylation	773.16	1263.4	1780.4	0	0	0	773.16	1263.4	1142.7	0	0	0	1.00:1.63:1.48:0:0:0	1848.5	0	1210.8	0	#DIV/0!	1.00:0	162071
1377	9431	| DNA polymerase alpha catalytic subunit isoform X1 | 5422 | POLA1 | 1443 | nan | nan	XP_016885083	35.76	4	4	4	Carbamidomethylation	773.16	1263.4	1780.4	0	0	0	773.16	1263.4	1142.7	0	0	0	1.00:1.63:1.48:0:0:0	1848.5	0	1210.8	0	#DIV/0!	1.00:0	163527
1377	9432	| DNA polymerase alpha catalytic subunit isoform 1 | 5422 | POLA1 | 1468 | A6NMQ1 | tr	NP_001317289	35.76	4	4	4	Carbamidomethylation	773.16	1263.4	1780.4	0	0	0	773.16	1263.4	1142.7	0	0	0	1.00:1.63:1.48:0:0:0	1848.5	0	1210.8	0	#DIV/0!	1.00:0	166457
1377	9545	| DNA polymerase alpha catalytic subunit isoform X5 | 5422 | POLA1 | 1326 | nan | nan	XP_006724562	35.76	4	4	4	Carbamidomethylation	773.16	1263.4	1780.4	0	0	0	773.16	1263.4	1142.7	0	0	0	1.00:1.63:1.48:0:0:0	1848.5	0	1210.8	0	#DIV/0!	1.00:0	150468
1230	10917	| nuclear factor NF-kappa-B p105 subunit isoform 2 proprotein | 4790 | NFKB1 | 968 | P19838 | sp	NP_001158884	35.68	5	3	3	Carbamidomethylation	1452.3	1070.1	1747.2	0	0	0	1452.3	1070.1	1747.2	0	0	0	1.00:0.74:1.20:0:0:0	1599.7	0	1599.7	0	#DIV/0!	1.00:0	105356
1230	10918	| nuclear factor NF-kappa-B p105 subunit isoform 2 proprotein | 4790 | NFKB1 | 968 | P19838 | sp	NP_001306155	35.68	5	3	3	Carbamidomethylation	1452.3	1070.1	1747.2	0	0	0	1452.3	1070.1	1747.2	0	0	0	1.00:0.74:1.20:0:0:0	1599.7	0	1599.7	0	#DIV/0!	1.00:0	105356
1230	10919	| nuclear factor NF-kappa-B p105 subunit isoform 1 | 4790 | NFKB1 | 969 | P19838 | sp	NP_003989	35.68	5	3	3	Carbamidomethylation	1452.3	1070.1	1747.2	0	0	0	1452.3	1070.1	1747.2	0	0	0	1.00:0.74:1.20:0:0:0	1599.7	0	1599.7	0	#DIV/0!	1.00:0	105427
1230	10920	| nuclear factor NF-kappa-B p105 subunit isoform X3 | 4790 | NFKB1 | 969 | nan | nan	XP_024309836	35.68	5	3	3	Carbamidomethylation	1452.3	1070.1	1747.2	0	0	0	1452.3	1070.1	1747.2	0	0	0	1.00:0.74:1.20:0:0:0	1599.7	0	1599.7	0	#DIV/0!	1.00:0	105427
1230	10921	| nuclear factor NF-kappa-B p105 subunit isoform X2 | 4790 | NFKB1 | 976 | nan | nan	XP_011530308	35.68	5	3	3	Carbamidomethylation	1452.3	1070.1	1747.2	0	0	0	1452.3	1070.1	1747.2	0	0	0	1.00:0.74:1.20:0:0:0	1599.7	0	1599.7	0	#DIV/0!	1.00:0	106364
1230	10922	| nuclear factor NF-kappa-B p105 subunit isoform X1 | 4790 | NFKB1 | 977 | nan | nan	XP_024309835	35.68	5	3	3	Carbamidomethylation	1452.3	1070.1	1747.2	0	0	0	1452.3	1070.1	1747.2	0	0	0	1.00:0.74:1.20:0:0:0	1599.7	0	1599.7	0	#DIV/0!	1.00:0	106435
73	1576	| heterogeneous nuclear ribonucleoprotein K isoform X3 | 3190 | HNRNPK | 440 | P61978 | sp	XP_005252020	35.67	3	1	1		405.17	430.31	686.91	0	0	0	405.17	430.31	686.91	0	0	0	1.00:1.06:1.70:0:0:0	507.46	0	507.46	0	#DIV/0!	1.00:0	48562
73	1578	| heterogeneous nuclear ribonucleoprotein K isoform d | 3190 | HNRNPK | 440 | P61978 | sp	NP_001305116	35.67	3	1	1		405.17	430.31	686.91	0	0	0	405.17	430.31	686.91	0	0	0	1.00:1.06:1.70:0:0:0	507.46	0	507.46	0	#DIV/0!	1.00:0	48562
73	1580	| heterogeneous nuclear ribonucleoprotein K isoform X3 | 3190 | HNRNPK | 440 | P61978 | sp	XP_005252022	35.67	3	1	1		405.17	430.31	686.91	0	0	0	405.17	430.31	686.91	0	0	0	1.00:1.06:1.70:0:0:0	507.46	0	507.46	0	#DIV/0!	1.00:0	48562
73	1581	| heterogeneous nuclear ribonucleoprotein K isoform X4 | 3190 | HNRNPK | 439 | B4DUQ1 | tr	XP_011516918	35.67	3	1	1		405.17	430.31	686.91	0	0	0	405.17	430.31	686.91	0	0	0	1.00:1.06:1.70:0:0:0	507.46	0	507.46	0	#DIV/0!	1.00:0	48511
73	1582	| heterogeneous nuclear ribonucleoprotein K isoform X4 | 3190 | HNRNPK | 439 | B4DUQ1 | tr	XP_016870158	35.67	3	1	1		405.17	430.31	686.91	0	0	0	405.17	430.31	686.91	0	0	0	1.00:1.06:1.70:0:0:0	507.46	0	507.46	0	#DIV/0!	1.00:0	48511
73	1584	| heterogeneous nuclear ribonucleoprotein K isoform c | 3190 | HNRNPK | 439 | P61978 | sp	NP_001305115	35.67	3	1	1		405.17	430.31	686.91	0	0	0	405.17	430.31	686.91	0	0	0	1.00:1.06:1.70:0:0:0	507.46	0	507.46	0	#DIV/0!	1.00:0	48511
1285	11558	| dnaJ homolog subfamily C member 9 | 23234 | DNAJC9 | 260 | Q8WXX5 | sp	NP_056005	35.65	17	3	3		1239.9	766.87	1146.2	0	0	0	1239.9	766.87	1146.2	0	0	0	1.00:0.62:0.92:0:0:0	1138.1	0	1138.1	0	#DIV/0!	1.00:0	29910
1613	13286	| protein transport protein Sec24B isoform e | 10427 | SEC24B | 1232 | O95487 | sp	NP_001305015	35.63	3	2	2		230.1	585.79	792.91	0	0	0	230.1	585.79	792.91	0	0	0	1.00:2.55:3.45:0:0:0	662.77	0	662.77	0	#DIV/0!	1.00:0	133501
1613	13287	| protein transport protein Sec24B isoform b | 10427 | SEC24B | 1233 | O95487 | sp	NP_001036199	35.63	3	2	2		230.1	585.79	792.91	0	0	0	230.1	585.79	792.91	0	0	0	1.00:2.55:3.45:0:0:0	662.77	0	662.77	0	#DIV/0!	1.00:0	133629
1613	13288	| protein transport protein Sec24B isoform X5 | 10427 | SEC24B | 1241 | nan | nan	XP_011529839	35.63	3	2	2		230.1	585.79	792.91	0	0	0	230.1	585.79	792.91	0	0	0	1.00:2.55:3.45:0:0:0	662.77	0	662.77	0	#DIV/0!	1.00:0	135492
1613	13289	| protein transport protein Sec24B isoform X4 | 10427 | SEC24B | 1244 | nan | nan	XP_011529838	35.63	3	2	2		230.1	585.79	792.91	0	0	0	230.1	585.79	792.91	0	0	0	1.00:2.55:3.45:0:0:0	662.77	0	662.77	0	#DIV/0!	1.00:0	135679
1613	13290	| protein transport protein Sec24B isoform X3 | 10427 | SEC24B | 1263 | nan | nan	XP_005262748	35.63	3	2	2		230.1	585.79	792.91	0	0	0	230.1	585.79	792.91	0	0	0	1.00:2.55:3.45:0:0:0	662.77	0	662.77	0	#DIV/0!	1.00:0	136632
1613	13291	| protein transport protein Sec24B isoform X2 | 10427 | SEC24B | 1264 | nan | nan	XP_011529837	35.63	3	2	2		230.1	585.79	792.91	0	0	0	230.1	585.79	792.91	0	0	0	1.00:2.55:3.45:0:0:0	662.77	0	662.77	0	#DIV/0!	1.00:0	136760
1613	13292	| protein transport protein Sec24B isoform d | 10427 | SEC24B | 1267 | O95487 | sp	NP_001305014	35.63	3	2	2		230.1	585.79	792.91	0	0	0	230.1	585.79	792.91	0	0	0	1.00:2.55:3.45:0:0:0	662.77	0	662.77	0	#DIV/0!	1.00:0	137289
1613	13293	| protein transport protein Sec24B isoform a | 10427 | SEC24B | 1268 | O95487 | sp	NP_006314	35.63	3	2	2		230.1	585.79	792.91	0	0	0	230.1	585.79	792.91	0	0	0	1.00:2.55:3.45:0:0:0	662.77	0	662.77	0	#DIV/0!	1.00:0	137417
1613	13294	| protein transport protein Sec24B isoform c | 10427 | SEC24B | 1298 | O95487 | sp	NP_001287742	35.63	3	2	2		230.1	585.79	792.91	0	0	0	230.1	585.79	792.91	0	0	0	1.00:2.55:3.45:0:0:0	662.77	0	662.77	0	#DIV/0!	1.00:0	140421
1613	13295	| protein transport protein Sec24B isoform X1 | 10427 | SEC24B | 1299 | nan | nan	XP_005262745	35.63	3	2	2		230.1	585.79	792.91	0	0	0	230.1	585.79	792.91	0	0	0	1.00:2.55:3.45:0:0:0	662.77	0	662.77	0	#DIV/0!	1.00:0	140549
562	1881	| kinetochore scaffold 1 isoform 2 | 57082 | KNL1 | 2316 | Q8NG31 | sp	NP_653091	35.63	6	10	10	Carbamidomethylation	3953.9	2290.3	3446.9	21588	25896	25365	1178.1	1199.1	1214.8	21588	25896	25365	1.00:1.02:1.03:18.33:21.98:21.53	3697.1	24283	1197.3	24283	0.0493061	1.00:20.28	262630
562	1882	| kinetochore scaffold 1 isoform 1 | 57082 | KNL1 | 2342 | Q8NG31 | sp	NP_733468	35.63	6	10	10	Carbamidomethylation	3953.9	2290.3	3446.9	21588	25896	25365	1178.1	1199.1	1214.8	21588	25896	25365	1.00:1.02:1.03:18.33:21.98:21.53	3697.1	24283	1197.3	24283	0.0493061	1.00:20.28	265389
562	1883	| kinetochore scaffold 1 isoform X1 | 57082 | KNL1 | 2208 | nan | nan	XP_016877921	35.63	6	10	10	Carbamidomethylation	3953.9	2290.3	3446.9	21588	25896	25365	1178.1	1199.1	1214.8	21588	25896	25365	1.00:1.02:1.03:18.33:21.98:21.53	3697.1	24283	1197.3	24283	0.0493061	1.00:20.28	250179
909	7337	| D-glutamate cyclase mitochondrial isoform a precursor | 80017 | DGLUCY | 616 | Q7Z3D6 | sp	NP_001095837	35.63	8	3	3	Carbamidomethylation	1582.9	1420.4	2247.7	0	0	0	1582.9	1420.4	2247.7	0	0	0	1.00:0.90:1.42:0:0:0	2064.7	0	2064.7	0	#DIV/0!	1.00:0	66437
909	7338	| D-glutamate cyclase mitochondrial isoform a precursor | 80017 | DGLUCY | 616 | Q7Z3D6 | sp	NP_079228	35.63	8	3	3	Carbamidomethylation	1582.9	1420.4	2247.7	0	0	0	1582.9	1420.4	2247.7	0	0	0	1.00:0.90:1.42:0:0:0	2064.7	0	2064.7	0	#DIV/0!	1.00:0	66437
909	7339	| D-glutamate cyclase mitochondrial isoform a precursor | 80017 | DGLUCY | 616 | Q7Z3D6 | sp	NP_001095836	35.63	8	3	3	Carbamidomethylation	1582.9	1420.4	2247.7	0	0	0	1582.9	1420.4	2247.7	0	0	0	1.00:0.90:1.42:0:0:0	2064.7	0	2064.7	0	#DIV/0!	1.00:0	66437
909	7340	| D-glutamate cyclase mitochondrial isoform a precursor | 80017 | DGLUCY | 616 | nan | nan	NP_001345240	35.63	8	3	3	Carbamidomethylation	1582.9	1420.4	2247.7	0	0	0	1582.9	1420.4	2247.7	0	0	0	1.00:0.90:1.42:0:0:0	2064.7	0	2064.7	0	#DIV/0!	1.00:0	66437
909	7341	| D-glutamate cyclase mitochondrial isoform a precursor | 80017 | DGLUCY | 616 | Q7Z3D6 | sp	NP_001273400	35.63	8	3	3	Carbamidomethylation	1582.9	1420.4	2247.7	0	0	0	1582.9	1420.4	2247.7	0	0	0	1.00:0.90:1.42:0:0:0	2064.7	0	2064.7	0	#DIV/0!	1.00:0	66437
909	7342	| D-glutamate cyclase mitochondrial isoform b precursor | 80017 | DGLUCY | 621 | nan | nan	NP_001345239	35.63	8	3	3	Carbamidomethylation	1582.9	1420.4	2247.7	0	0	0	1582.9	1420.4	2247.7	0	0	0	1.00:0.90:1.42:0:0:0	2064.7	0	2064.7	0	#DIV/0!	1.00:0	66927
909	7343	| D-glutamate cyclase mitochondrial isoform b precursor | 80017 | DGLUCY | 621 | Q7Z3D6 | sp	NP_001095838	35.63	8	3	3	Carbamidomethylation	1582.9	1420.4	2247.7	0	0	0	1582.9	1420.4	2247.7	0	0	0	1.00:0.90:1.42:0:0:0	2064.7	0	2064.7	0	#DIV/0!	1.00:0	66927
909	7344	| D-glutamate cyclase mitochondrial isoform b precursor | 80017 | DGLUCY | 621 | nan | nan	NP_001345241	35.63	8	3	3	Carbamidomethylation	1582.9	1420.4	2247.7	0	0	0	1582.9	1420.4	2247.7	0	0	0	1.00:0.90:1.42:0:0:0	2064.7	0	2064.7	0	#DIV/0!	1.00:0	66927
909	7345	| D-glutamate cyclase mitochondrial isoform b precursor | 80017 | DGLUCY | 621 | Q7Z3D6 | sp	NP_001273399	35.63	8	3	3	Carbamidomethylation	1582.9	1420.4	2247.7	0	0	0	1582.9	1420.4	2247.7	0	0	0	1.00:0.90:1.42:0:0:0	2064.7	0	2064.7	0	#DIV/0!	1.00:0	66927
1801	11796	| ribosome-releasing factor 2 mitochondrial isoform 2 | 84340 | GFM2 | 732 | Q969S9 | sp	NP_733792	35.61	4	2	2	Carbamidomethylation	203.74	236.4	622.5	0	0	0	203.74	236.4	622.5	0	0	0	1.00:1.16:3.06:0:0:0	508.21	0	508.21	0	#DIV/0!	1.00:0	81200
1801	11797	| ribosome-releasing factor 2 mitochondrial isoform 1 | 84340 | GFM2 | 779 | Q969S9 | sp	NP_115756	35.61	4	2	2	Carbamidomethylation	203.74	236.4	622.5	0	0	0	203.74	236.4	622.5	0	0	0	1.00:1.16:3.06:0:0:0	508.21	0	508.21	0	#DIV/0!	1.00:0	86601
1801	11798	| ribosome-releasing factor 2 mitochondrial isoform X1 | 84340 | GFM2 | 779 | Q969S9 | sp	XP_016865475	35.61	4	2	2	Carbamidomethylation	203.74	236.4	622.5	0	0	0	203.74	236.4	622.5	0	0	0	1.00:1.16:3.06:0:0:0	508.21	0	508.21	0	#DIV/0!	1.00:0	86601
1801	11799	| ribosome-releasing factor 2 mitochondrial isoform 4 | 84340 | GFM2 | 811 | Q969S9 | sp	NP_001268231	35.61	4	2	2	Carbamidomethylation	203.74	236.4	622.5	0	0	0	203.74	236.4	622.5	0	0	0	1.00:1.16:3.06:0:0:0	508.21	0	508.21	0	#DIV/0!	1.00:0	90506
1345	7766	| oxysterol-binding protein 1 | 5007 | OSBP | 807 | P22059 | sp	NP_002547	35.57	9	5	5	Carbamidomethylation	2267.8	1702.8	2066.2	0	0	0	2059.4	1285.5	1485.1	0	0	0	1.00:0.62:0.72:0:0:0	2360.2	0	1869.2	0	#DIV/0!	1.00:0	89421
1584	12449	| serine/threonine-protein kinase 10 | 6793 | STK10 | 968 | O94804 | sp	NP_005981	35.56	3	2	2	Carbamidomethylation	894.33	599.71	989.71	0	0	0	894.33	599.71	989.71	0	0	0	1.00:0.67:1.11:0:0:0	1006.8	0	1006.8	0	#DIV/0!	1.00:0	112135
1584	12527	| serine/threonine-protein kinase 10 isoform X1 | 6793 | STK10 | 860 | nan | nan	XP_016865277	35.56	3	2	2	Carbamidomethylation	894.33	599.71	989.71	0	0	0	894.33	599.71	989.71	0	0	0	1.00:0.67:1.11:0:0:0	1006.8	0	1006.8	0	#DIV/0!	1.00:0	99633
383	2374	| tyrosine-protein phosphatase non-receptor type 1 isoform 1 | 5770 | PTPN1 | 435 | P18031 | sp	NP_002818	35.55	43	13	13	Carbamidomethylation; Acetylation (Protein N-term)	17852	14525	17599	0	493.28	452.56	7042.1	5481.2	7449	0	493.28	452.56	1.00:0.78:1.06:0:0.07:0.06	16838	472.92	6657.4	472.92	14.0772	1.00:0.07	49967
1885	9808	| pre-mRNA-splicing factor ATP-dependent RNA helicase PRP16 isoform | 9785 | DHX38 | 1192 | nan | nan	XP_016879402	35.54	1	1	1		541.54	299.6	409.59	0	0	0	541.54	299.6	409.59	0	0	0	1.00:0.55:0.76:0:0:0	416.91	0	416.91	0	#DIV/0!	1.00:0	136331
1885	9809	| pre-mRNA-splicing factor ATP-dependent RNA helicase PRP16 isoform | 9785 | DHX38 | 1192 | nan | nan	XP_005256326	35.54	1	1	1		541.54	299.6	409.59	0	0	0	541.54	299.6	409.59	0	0	0	1.00:0.55:0.76:0:0:0	416.91	0	416.91	0	#DIV/0!	1.00:0	136331
1885	9810	| pre-mRNA-splicing factor ATP-dependent RNA helicase PRP16 | 9785 | DHX38 | 1227 | Q92620 | sp	NP_054722	35.54	1	1	1		541.54	299.6	409.59	0	0	0	541.54	299.6	409.59	0	0	0	1.00:0.55:0.76:0:0:0	416.91	0	416.91	0	#DIV/0!	1.00:0	140502
1885	9811	| pre-mRNA-splicing factor ATP-dependent RNA helicase PRP16 isoform | 9785 | DHX38 | 1227 | Q92620 | sp	XP_011521787	35.54	1	1	1		541.54	299.6	409.59	0	0	0	541.54	299.6	409.59	0	0	0	1.00:0.55:0.76:0:0:0	416.91	0	416.91	0	#DIV/0!	1.00:0	140502
1885	9812	| pre-mRNA-splicing factor ATP-dependent RNA helicase PRP16 isoform | 9785 | DHX38 | 1227 | Q92620 | sp	XP_011521786	35.54	1	1	1		541.54	299.6	409.59	0	0	0	541.54	299.6	409.59	0	0	0	1.00:0.55:0.76:0:0:0	416.91	0	416.91	0	#DIV/0!	1.00:0	140502
1275	10021	| fatty acid-binding protein epidermal | 2171 | FABP5 | 135 | Q01469 | sp	NP_001435	35.53	41	4	4	Carbamidomethylation	2876.3	2325	2596.5	670.95	545.59	695.96	2876.3	2325	2194.3	670.95	545.59	695.96	1.00:0.81:0.76:0.23:0.19:0.24	2867.4	637.5	2465.2	637.5	3.86698	1.00:0.26	15164
2088	27629	| eukaryotic translation initiation factor 2A isoform 5 | 83939 | EIF2A | 371 | Q9BY44 | sp	NP_001305975	35.53	5	1	1		511.18	350.17	282.1	0	0	0	511.18	350.17	282.1	0	0	0	1.00:0.69:0.55:0:0:0	381.15	0	381.15	0	#DIV/0!	1.00:0	41339
261	155	| T-complex protein 1 subunit theta isoform 1 | 10694 | CCT8 | 548 | P50990 | sp	NP_006576	35.49	41	18	18	Carbamidomethylation	23133	21216	21850	7619.8	7953.2	9673	6279.5	6070.1	5443.3	2573.4	2851	3001.3	1.00:0.97:0.87:0.41:0.45:0.48	22210	9452.4	5931	2808.6	2.11173	1.00:0.47	59621
1228	9193	| uridine 5'-monophosphate synthase | 7372 | UMPS | 480 | P11172 | sp	NP_000364	35.48	8	3	3		1290.8	786.58	1109	0	0	0	1290.8	786.58	1109	0	0	0	1.00:0.61:0.86:0:0:0	1291.4	0	1291.4	0	#DIV/0!	1.00:0	52222
1711	13169	| phosphoribosyl pyrophosphate synthase-associated protein 2 isoform | 5636 | PRPSAP2 | 283 | O60256 | sp	XP_016880362	35.47	18	3	3		367.22	1171.3	1262	0	0	0	367.22	1171.3	1262	0	0	0	1.00:3.19:3.44:0:0:0	1384.1	0	1384.1	0	#DIV/0!	1.00:0	31322
1711	13170	| phosphoribosyl pyrophosphate synthase-associated protein 2 isoform | 5636 | PRPSAP2 | 283 | O60256 | sp	XP_016880363	35.47	18	3	3		367.22	1171.3	1262	0	0	0	367.22	1171.3	1262	0	0	0	1.00:3.19:3.44:0:0:0	1384.1	0	1384.1	0	#DIV/0!	1.00:0	31322
1711	13171	| phosphoribosyl pyrophosphate synthase-associated protein 2 isoform | 5636 | PRPSAP2 | 283 | nan | nan	NP_001340033	35.47	18	3	3		367.22	1171.3	1262	0	0	0	367.22	1171.3	1262	0	0	0	1.00:3.19:3.44:0:0:0	1384.1	0	1384.1	0	#DIV/0!	1.00:0	31322
1711	13172	| phosphoribosyl pyrophosphate synthase-associated protein 2 isoform | 5636 | PRPSAP2 | 283 | O60256 | sp	XP_016880364	35.47	18	3	3		367.22	1171.3	1262	0	0	0	367.22	1171.3	1262	0	0	0	1.00:3.19:3.44:0:0:0	1384.1	0	1384.1	0	#DIV/0!	1.00:0	31322
1711	13173	| phosphoribosyl pyrophosphate synthase-associated protein 2 isoform | 5636 | PRPSAP2 | 283 | nan | nan	NP_001340032	35.47	18	3	3		367.22	1171.3	1262	0	0	0	367.22	1171.3	1262	0	0	0	1.00:3.19:3.44:0:0:0	1384.1	0	1384.1	0	#DIV/0!	1.00:0	31322
1711	13174	| phosphoribosyl pyrophosphate synthase-associated protein 2 isoform | 5636 | PRPSAP2 | 283 | nan | nan	NP_001340029	35.47	18	3	3		367.22	1171.3	1262	0	0	0	367.22	1171.3	1262	0	0	0	1.00:3.19:3.44:0:0:0	1384.1	0	1384.1	0	#DIV/0!	1.00:0	31322
1711	13175	| phosphoribosyl pyrophosphate synthase-associated protein 2 isoform | 5636 | PRPSAP2 | 283 | O60256 | sp	XP_016880360	35.47	18	3	3		367.22	1171.3	1262	0	0	0	367.22	1171.3	1262	0	0	0	1.00:3.19:3.44:0:0:0	1384.1	0	1384.1	0	#DIV/0!	1.00:0	31322
1711	13176	| phosphoribosyl pyrophosphate synthase-associated protein 2 isoform | 5636 | PRPSAP2 | 283 | O60256 | sp	NP_001230870	35.47	18	3	3		367.22	1171.3	1262	0	0	0	367.22	1171.3	1262	0	0	0	1.00:3.19:3.44:0:0:0	1384.1	0	1384.1	0	#DIV/0!	1.00:0	31322
1711	13177	| phosphoribosyl pyrophosphate synthase-associated protein 2 isoform | 5636 | PRPSAP2 | 283 | O60256 | sp	NP_001230871	35.47	18	3	3		367.22	1171.3	1262	0	0	0	367.22	1171.3	1262	0	0	0	1.00:3.19:3.44:0:0:0	1384.1	0	1384.1	0	#DIV/0!	1.00:0	31322
1711	13515	| phosphoribosyl pyrophosphate synthase-associated protein 2 isoform | 5636 | PRPSAP2 | 324 | nan | nan	NP_001340025	35.47	15	3	3		367.22	1171.3	1262	0	0	0	367.22	1171.3	1262	0	0	0	1.00:3.19:3.44:0:0:0	1384.1	0	1384.1	0	#DIV/0!	1.00:0	36039
1711	13516	| phosphoribosyl pyrophosphate synthase-associated protein 2 isoform | 5636 | PRPSAP2 | 324 | nan | nan	NP_001340028	35.47	15	3	3		367.22	1171.3	1262	0	0	0	367.22	1171.3	1262	0	0	0	1.00:3.19:3.44:0:0:0	1384.1	0	1384.1	0	#DIV/0!	1.00:0	36039
1711	13517	| phosphoribosyl pyrophosphate synthase-associated protein 2 isoform | 5636 | PRPSAP2 | 324 | nan | nan	NP_001340026	35.47	15	3	3		367.22	1171.3	1262	0	0	0	367.22	1171.3	1262	0	0	0	1.00:3.19:3.44:0:0:0	1384.1	0	1384.1	0	#DIV/0!	1.00:0	36039
1711	13518	| phosphoribosyl pyrophosphate synthase-associated protein 2 isoform | 5636 | PRPSAP2 | 329 | O60256 | sp	NP_001230865	35.47	15	3	3		367.22	1171.3	1262	0	0	0	367.22	1171.3	1262	0	0	0	1.00:3.19:3.44:0:0:0	1384.1	0	1384.1	0	#DIV/0!	1.00:0	36297
1711	13519	| phosphoribosyl pyrophosphate synthase-associated protein 2 isoform | 5636 | PRPSAP2 | 369 | nan | nan	NP_001340030	35.47	14	3	3		367.22	1171.3	1262	0	0	0	367.22	1171.3	1262	0	0	0	1.00:3.19:3.44:0:0:0	1384.1	0	1384.1	0	#DIV/0!	1.00:0	40926
1711	13520	| phosphoribosyl pyrophosphate synthase-associated protein 2 isoform | 5636 | PRPSAP2 | 369 | O60256 | sp	XP_016880355	35.47	14	3	3		367.22	1171.3	1262	0	0	0	367.22	1171.3	1262	0	0	0	1.00:3.19:3.44:0:0:0	1384.1	0	1384.1	0	#DIV/0!	1.00:0	40926
1711	13521	| phosphoribosyl pyrophosphate synthase-associated protein 2 isoform | 5636 | PRPSAP2 | 369 | nan | nan	NP_001340031	35.47	14	3	3		367.22	1171.3	1262	0	0	0	367.22	1171.3	1262	0	0	0	1.00:3.19:3.44:0:0:0	1384.1	0	1384.1	0	#DIV/0!	1.00:0	40926
1711	13522	| phosphoribosyl pyrophosphate synthase-associated protein 2 isoform | 5636 | PRPSAP2 | 369 | nan | nan	NP_001340036	35.47	14	3	3		367.22	1171.3	1262	0	0	0	367.22	1171.3	1262	0	0	0	1.00:3.19:3.44:0:0:0	1384.1	0	1384.1	0	#DIV/0!	1.00:0	40926
1711	13523	| phosphoribosyl pyrophosphate synthase-associated protein 2 isoform | 5636 | PRPSAP2 | 369 | nan | nan	NP_001340034	35.47	14	3	3		367.22	1171.3	1262	0	0	0	367.22	1171.3	1262	0	0	0	1.00:3.19:3.44:0:0:0	1384.1	0	1384.1	0	#DIV/0!	1.00:0	40926
1711	13524	| phosphoribosyl pyrophosphate synthase-associated protein 2 isoform | 5636 | PRPSAP2 | 369 | nan | nan	NP_001340035	35.47	14	3	3		367.22	1171.3	1262	0	0	0	367.22	1171.3	1262	0	0	0	1.00:3.19:3.44:0:0:0	1384.1	0	1384.1	0	#DIV/0!	1.00:0	40926
1711	13525	| phosphoribosyl pyrophosphate synthase-associated protein 2 isoform | 5636 | PRPSAP2 | 369 | O60256 | sp	XP_016880354	35.47	14	3	3		367.22	1171.3	1262	0	0	0	367.22	1171.3	1262	0	0	0	1.00:3.19:3.44:0:0:0	1384.1	0	1384.1	0	#DIV/0!	1.00:0	40926
1711	13526	| phosphoribosyl pyrophosphate synthase-associated protein 2 isoform | 5636 | PRPSAP2 | 423 | nan | nan	NP_001340027	35.47	12	3	3		367.22	1171.3	1262	0	0	0	367.22	1171.3	1262	0	0	0	1.00:3.19:3.44:0:0:0	1384.1	0	1384.1	0	#DIV/0!	1.00:0	46920
2057	15365	| lysine-specific demethylase 9 | 54665 | RSBN1 | 802 | Q5VWQ0 | sp	NP_060834	35.46	2	1	1		412.41	226.16	344.32	0	0	0	412.41	226.16	344.32	0	0	0	1.00:0.55:0.83:0:0:0	327.63	0	327.63	0	#DIV/0!	1.00:0	90072
2057	24737	| lysine-specific demethylase 9 isoform X1 | 54665 | RSBN1 | 459 | Q5VWQ0 | sp	XP_016857007	35.46	3	1	1		412.41	226.16	344.32	0	0	0	412.41	226.16	344.32	0	0	0	1.00:0.55:0.83:0:0:0	327.63	0	327.63	0	#DIV/0!	1.00:0	50802
1360	10137	| lipoma-preferred partner isoform X2 | 4026 | LPP | 612 | Q93052 | sp	XP_011511136	35.46	7	3	3		879.53	255.13	709.48	0	0	0	879.53	255.13	709.48	0	0	0	1.00:0.29:0.81:0:0:0	925.49	0	925.49	0	#DIV/0!	1.00:0	65746
1360	10138	| lipoma-preferred partner isoform X2 | 4026 | LPP | 612 | Q93052 | sp	XP_016861867	35.46	7	3	3		879.53	255.13	709.48	0	0	0	879.53	255.13	709.48	0	0	0	1.00:0.29:0.81:0:0:0	925.49	0	925.49	0	#DIV/0!	1.00:0	65746
1360	10139	| lipoma-preferred partner isoform X2 | 4026 | LPP | 612 | Q93052 | sp	XP_011511130	35.46	7	3	3		879.53	255.13	709.48	0	0	0	879.53	255.13	709.48	0	0	0	1.00:0.29:0.81:0:0:0	925.49	0	925.49	0	#DIV/0!	1.00:0	65746
1360	10140	| lipoma-preferred partner isoform X2 | 4026 | LPP | 612 | Q93052 | sp	XP_011511135	35.46	7	3	3		879.53	255.13	709.48	0	0	0	879.53	255.13	709.48	0	0	0	1.00:0.29:0.81:0:0:0	925.49	0	925.49	0	#DIV/0!	1.00:0	65746
1360	10141	| lipoma-preferred partner isoform X2 | 4026 | LPP | 612 | Q93052 | sp	XP_016861868	35.46	7	3	3		879.53	255.13	709.48	0	0	0	879.53	255.13	709.48	0	0	0	1.00:0.29:0.81:0:0:0	925.49	0	925.49	0	#DIV/0!	1.00:0	65746
1360	10142	| lipoma-preferred partner isoform X2 | 4026 | LPP | 612 | Q93052 | sp	XP_011511133	35.46	7	3	3		879.53	255.13	709.48	0	0	0	879.53	255.13	709.48	0	0	0	1.00:0.29:0.81:0:0:0	925.49	0	925.49	0	#DIV/0!	1.00:0	65746
1360	10143	| lipoma-preferred partner isoform a | 4026 | LPP | 612 | Q93052 | sp	NP_001161143	35.46	7	3	3		879.53	255.13	709.48	0	0	0	879.53	255.13	709.48	0	0	0	1.00:0.29:0.81:0:0:0	925.49	0	925.49	0	#DIV/0!	1.00:0	65746
1360	10144	| lipoma-preferred partner isoform X2 | 4026 | LPP | 612 | Q93052 | sp	XP_011511129	35.46	7	3	3		879.53	255.13	709.48	0	0	0	879.53	255.13	709.48	0	0	0	1.00:0.29:0.81:0:0:0	925.49	0	925.49	0	#DIV/0!	1.00:0	65746
1360	10145	| lipoma-preferred partner isoform X2 | 4026 | LPP | 612 | Q93052 | sp	XP_016861869	35.46	7	3	3		879.53	255.13	709.48	0	0	0	879.53	255.13	709.48	0	0	0	1.00:0.29:0.81:0:0:0	925.49	0	925.49	0	#DIV/0!	1.00:0	65746
1360	10146	| lipoma-preferred partner isoform X2 | 4026 | LPP | 612 | nan | nan	XP_024309287	35.46	7	3	3		879.53	255.13	709.48	0	0	0	879.53	255.13	709.48	0	0	0	1.00:0.29:0.81:0:0:0	925.49	0	925.49	0	#DIV/0!	1.00:0	65746
1360	10147	| lipoma-preferred partner isoform X2 | 4026 | LPP | 612 | Q93052 | sp	XP_005247510	35.46	7	3	3		879.53	255.13	709.48	0	0	0	879.53	255.13	709.48	0	0	0	1.00:0.29:0.81:0:0:0	925.49	0	925.49	0	#DIV/0!	1.00:0	65746
1360	10148	| lipoma-preferred partner isoform a | 4026 | LPP | 612 | Q93052 | sp	NP_005569	35.46	7	3	3		879.53	255.13	709.48	0	0	0	879.53	255.13	709.48	0	0	0	1.00:0.29:0.81:0:0:0	925.49	0	925.49	0	#DIV/0!	1.00:0	65746
1360	10149	| lipoma-preferred partner isoform X2 | 4026 | LPP | 612 | Q93052 | sp	XP_005247508	35.46	7	3	3		879.53	255.13	709.48	0	0	0	879.53	255.13	709.48	0	0	0	1.00:0.29:0.81:0:0:0	925.49	0	925.49	0	#DIV/0!	1.00:0	65746
1360	10150	| lipoma-preferred partner isoform X2 | 4026 | LPP | 612 | Q93052 | sp	XP_016861866	35.46	7	3	3		879.53	255.13	709.48	0	0	0	879.53	255.13	709.48	0	0	0	1.00:0.29:0.81:0:0:0	925.49	0	925.49	0	#DIV/0!	1.00:0	65746
1360	10151	| lipoma-preferred partner isoform X2 | 4026 | LPP | 612 | Q93052 | sp	XP_011511122	35.46	7	3	3		879.53	255.13	709.48	0	0	0	879.53	255.13	709.48	0	0	0	1.00:0.29:0.81:0:0:0	925.49	0	925.49	0	#DIV/0!	1.00:0	65746
1360	10152	| lipoma-preferred partner isoform X2 | 4026 | LPP | 612 | Q93052 | sp	XP_005247503	35.46	7	3	3		879.53	255.13	709.48	0	0	0	879.53	255.13	709.48	0	0	0	1.00:0.29:0.81:0:0:0	925.49	0	925.49	0	#DIV/0!	1.00:0	65746
1360	10153	| lipoma-preferred partner isoform X2 | 4026 | LPP | 612 | Q93052 | sp	XP_005247507	35.46	7	3	3		879.53	255.13	709.48	0	0	0	879.53	255.13	709.48	0	0	0	1.00:0.29:0.81:0:0:0	925.49	0	925.49	0	#DIV/0!	1.00:0	65746
1360	10520	| lipoma-preferred partner isoform X1 | 4026 | LPP | 637 | nan | nan	XP_011511125	35.46	7	3	3		879.53	255.13	709.48	0	0	0	879.53	255.13	709.48	0	0	0	1.00:0.29:0.81:0:0:0	925.49	0	925.49	0	#DIV/0!	1.00:0	68447
1360	11775	| lipoma-preferred partner isoform X4 | 4026 | LPP | 449 | B7Z871 | tr	XP_011511138	35.46	10	3	3		879.53	255.13	709.48	0	0	0	879.53	255.13	709.48	0	0	0	1.00:0.29:0.81:0:0:0	925.49	0	925.49	0	#DIV/0!	1.00:0	48517
1360	11776	| lipoma-preferred partner isoform X4 | 4026 | LPP | 449 | B7Z871 | tr	XP_016861871	35.46	10	3	3		879.53	255.13	709.48	0	0	0	879.53	255.13	709.48	0	0	0	1.00:0.29:0.81:0:0:0	925.49	0	925.49	0	#DIV/0!	1.00:0	48517
1956	11617	| probable E3 ubiquitin-protein ligase HERC4 isoform c | 26091 | HERC4 | 979 | Q5GLZ8 | sp	NP_001265114	35.45	1	1	1		261.22	476.23	365.43	0	0	0	261.22	476.23	365.43	0	0	0	1.00:1.82:1.40:0:0:0	367.63	0	367.63	0	#DIV/0!	1.00:0	109585
1956	11618	| probable E3 ubiquitin-protein ligase HERC4 isoform X6 | 26091 | HERC4 | 987 | nan | nan	XP_011537898	35.45	1	1	1		261.22	476.23	365.43	0	0	0	261.22	476.23	365.43	0	0	0	1.00:1.82:1.40:0:0:0	367.63	0	367.63	0	#DIV/0!	1.00:0	110792
1956	11619	| probable E3 ubiquitin-protein ligase HERC4 isoform X5 | 26091 | HERC4 | 1011 | nan | nan	XP_011537896	35.45	1	1	1		261.22	476.23	365.43	0	0	0	261.22	476.23	365.43	0	0	0	1.00:1.82:1.40:0:0:0	367.63	0	367.63	0	#DIV/0!	1.00:0	113422
1956	11620	| probable E3 ubiquitin-protein ligase HERC4 isoform X5 | 26091 | HERC4 | 1011 | nan | nan	XP_011537897	35.45	1	1	1		261.22	476.23	365.43	0	0	0	261.22	476.23	365.43	0	0	0	1.00:1.82:1.40:0:0:0	367.63	0	367.63	0	#DIV/0!	1.00:0	113422
1956	11621	| probable E3 ubiquitin-protein ligase HERC4 isoform X4 | 26091 | HERC4 | 1049 | nan | nan	XP_024303699	35.45	1	1	1		261.22	476.23	365.43	0	0	0	261.22	476.23	365.43	0	0	0	1.00:1.82:1.40:0:0:0	367.63	0	367.63	0	#DIV/0!	1.00:0	117697
1956	11622	| probable E3 ubiquitin-protein ligase HERC4 isoform b | 26091 | HERC4 | 1049 | Q5GLZ8 | sp	NP_056416	35.45	1	1	1		261.22	476.23	365.43	0	0	0	261.22	476.23	365.43	0	0	0	1.00:1.82:1.40:0:0:0	367.63	0	367.63	0	#DIV/0!	1.00:0	117697
1956	11623	| probable E3 ubiquitin-protein ligase HERC4 isoform a | 26091 | HERC4 | 1057 | Q5GLZ8 | sp	NP_071362	35.45	1	1	1		261.22	476.23	365.43	0	0	0	261.22	476.23	365.43	0	0	0	1.00:1.82:1.40:0:0:0	367.63	0	367.63	0	#DIV/0!	1.00:0	118563
1956	11624	| probable E3 ubiquitin-protein ligase HERC4 isoform X3 | 26091 | HERC4 | 1057 | nan | nan	XP_024303697	35.45	1	1	1		261.22	476.23	365.43	0	0	0	261.22	476.23	365.43	0	0	0	1.00:1.82:1.40:0:0:0	367.63	0	367.63	0	#DIV/0!	1.00:0	118563
1956	11625	| probable E3 ubiquitin-protein ligase HERC4 isoform X3 | 26091 | HERC4 | 1057 | nan | nan	XP_024303698	35.45	1	1	1		261.22	476.23	365.43	0	0	0	261.22	476.23	365.43	0	0	0	1.00:1.82:1.40:0:0:0	367.63	0	367.63	0	#DIV/0!	1.00:0	118563
1956	11626	| probable E3 ubiquitin-protein ligase HERC4 isoform X2 | 26091 | HERC4 | 1073 | nan | nan	XP_011537895	35.45	1	1	1		261.22	476.23	365.43	0	0	0	261.22	476.23	365.43	0	0	0	1.00:1.82:1.40:0:0:0	367.63	0	367.63	0	#DIV/0!	1.00:0	120327
1956	11627	| probable E3 ubiquitin-protein ligase HERC4 isoform X1 | 26091 | HERC4 | 1081 | nan | nan	XP_011537894	35.45	1	1	1		261.22	476.23	365.43	0	0	0	261.22	476.23	365.43	0	0	0	1.00:1.82:1.40:0:0:0	367.63	0	367.63	0	#DIV/0!	1.00:0	121193
1956	11628	| probable E3 ubiquitin-protein ligase HERC4 isoform X1 | 26091 | HERC4 | 1081 | nan | nan	XP_024303696	35.45	1	1	1		261.22	476.23	365.43	0	0	0	261.22	476.23	365.43	0	0	0	1.00:1.82:1.40:0:0:0	367.63	0	367.63	0	#DIV/0!	1.00:0	121193
1956	11629	| probable E3 ubiquitin-protein ligase HERC4 isoform X1 | 26091 | HERC4 | 1081 | nan | nan	XP_024303695	35.45	1	1	1		261.22	476.23	365.43	0	0	0	261.22	476.23	365.43	0	0	0	1.00:1.82:1.40:0:0:0	367.63	0	367.63	0	#DIV/0!	1.00:0	121193
1956	13075	| probable E3 ubiquitin-protein ligase HERC4 isoform X8 | 26091 | HERC4 | 936 | nan | nan	XP_016871530	35.45	1	1	1		261.22	476.23	365.43	0	0	0	261.22	476.23	365.43	0	0	0	1.00:1.82:1.40:0:0:0	367.63	0	367.63	0	#DIV/0!	1.00:0	104818
1956	13076	| probable E3 ubiquitin-protein ligase HERC4 isoform X7 | 26091 | HERC4 | 960 | nan | nan	XP_011537899	35.45	1	1	1		261.22	476.23	365.43	0	0	0	261.22	476.23	365.43	0	0	0	1.00:1.82:1.40:0:0:0	367.63	0	367.63	0	#DIV/0!	1.00:0	107449
845	4711	| exportin-T | 11260 | XPOT | 962 | O43592 | sp	NP_009166	35.44	7	5	5	Carbamidomethylation	974.2	1585.7	2209.8	0	0	0	974.2	1286.1	1592.2	0	0	0	1.00:1.32:1.63:0:0:0	1923.1	0	1284.2	0	#DIV/0!	1.00:0	109964
845	4712	| exportin-T isoform X1 | 11260 | XPOT | 962 | O43592 | sp	XP_016874237	35.44	7	5	5	Carbamidomethylation	974.2	1585.7	2209.8	0	0	0	974.2	1286.1	1592.2	0	0	0	1.00:1.32:1.63:0:0:0	1923.1	0	1284.2	0	#DIV/0!	1.00:0	109964
1611	8029	| ATP-binding cassette sub-family D member 3 isoform X1 | 5825 | ABCD3 | 683 | nan | nan	XP_006710865	35.43	6	3	3		408.31	1160.1	1545.5	0	0	0	408.31	1160.1	1545.5	0	0	0	1.00:2.84:3.79:0:0:0	1338.1	0	1338.1	0	#DIV/0!	1.00:0	78402
1611	8109	| ATP-binding cassette sub-family D member 3 isoform a | 5825 | ABCD3 | 659 | P28288 | sp	NP_002849	35.43	6	3	3		408.31	1160.1	1545.5	0	0	0	408.31	1160.1	1545.5	0	0	0	1.00:2.84:3.79:0:0:0	1338.1	0	1338.1	0	#DIV/0!	1.00:0	75476
351	3820	| mitochondrial carrier homolog 2 isoform X4 | 23788 | MTCH2 | 259 | nan | nan	XP_006718235	35.38	8	1	1		6463.4	4827.3	7099.2	0	0	0	6463.4	4827.3	7099.2	0	0	0	1.00:0.75:1.10:0:0:0	6130	0	6130	0	#DIV/0!	1.00:0	28611
351	3822	| mitochondrial carrier homolog 2 isoform X3 | 23788 | MTCH2 | 270 | nan | nan	XP_011518263	35.38	8	1	1		6463.4	4827.3	7099.2	0	0	0	6463.4	4827.3	7099.2	0	0	0	1.00:0.75:1.10:0:0:0	6130	0	6130	0	#DIV/0!	1.00:0	29748
351	3823	| mitochondrial carrier homolog 2 isoform 1 | 23788 | MTCH2 | 303 | Q9Y6C9 | sp	NP_055157	35.38	7	1	1		6463.4	4827.3	7099.2	0	0	0	6463.4	4827.3	7099.2	0	0	0	1.00:0.75:1.10:0:0:0	6130	0	6130	0	#DIV/0!	1.00:0	33331
351	3824	| mitochondrial carrier homolog 2 isoform X1 | 23788 | MTCH2 | 307 | nan | nan	XP_011518261	35.38	7	1	1		6463.4	4827.3	7099.2	0	0	0	6463.4	4827.3	7099.2	0	0	0	1.00:0.75:1.10:0:0:0	6130	0	6130	0	#DIV/0!	1.00:0	33788
351	3827	| mitochondrial carrier homolog 2 isoform 1x | 23788 | MTCH2 | 314 | Q9Y6C9 | sp	NP_001304160	35.38	7	1	1		6463.4	4827.3	7099.2	0	0	0	6463.4	4827.3	7099.2	0	0	0	1.00:0.75:1.10:0:0:0	6130	0	6130	0	#DIV/0!	1.00:0	34456
1742	13254	| ADP-ribosylation factor-like protein 1 isoform 1 | 400 | ARL1 | 181 | P40616 | sp	NP_001168	35.28	14	2	2		1451.6	1447.5	1654.9	312.95	0	341.41	1451.6	1447.5	1654.9	312.95	0	341.41	1.00:1.00:1.14:0.22:0:0.24	1518	327.18	1518	327.18	4.63965	1.00:0.22	20418
1612	11925	| caseinolytic peptidase B protein homolog isoform 4 | 81570 | CLPB | 662 | Q9H078 | sp	NP_001245323	35.27	6	3	3		681.99	560.13	944.69	0	0	0	681.99	560.13	944.69	0	0	0	1.00:0.82:1.39:0:0:0	885.2	0	885.2	0	#DIV/0!	1.00:0	74543
1612	12189	| caseinolytic peptidase B protein homolog isoform 3 | 81570 | CLPB | 648 | Q9H078 | sp	NP_001245322	35.27	6	3	3		681.99	560.13	944.69	0	0	0	681.99	560.13	944.69	0	0	0	1.00:0.82:1.39:0:0:0	885.2	0	885.2	0	#DIV/0!	1.00:0	72276
1612	12190	| caseinolytic peptidase B protein homolog isoform 2 | 81570 | CLPB | 677 | Q9H078 | sp	NP_001245321	35.27	6	3	3		681.99	560.13	944.69	0	0	0	681.99	560.13	944.69	0	0	0	1.00:0.82:1.39:0:0:0	885.2	0	885.2	0	#DIV/0!	1.00:0	75449
1612	12191	| caseinolytic peptidase B protein homolog isoform X1 | 81570 | CLPB | 678 | nan | nan	XP_005274377	35.27	6	3	3		681.99	560.13	944.69	0	0	0	681.99	560.13	944.69	0	0	0	1.00:0.82:1.39:0:0:0	885.2	0	885.2	0	#DIV/0!	1.00:0	75555
1612	12192	| caseinolytic peptidase B protein homolog isoform 1 | 81570 | CLPB | 707 | Q9H078 | sp	NP_110440	35.27	6	3	3		681.99	560.13	944.69	0	0	0	681.99	560.13	944.69	0	0	0	1.00:0.82:1.39:0:0:0	885.2	0	885.2	0	#DIV/0!	1.00:0	78729
1904	23135	| SH2 domain-containing adapter protein B | 6461 | SHB | 509 | Q15464 | sp	NP_003019	35.26	4	1	1	Carbamidomethylation	246.41	252.76	424.58	0	0	0	246.41	252.76	424.58	0	0	0	1.00:1.03:1.72:0:0:0	307.91	0	307.91	0	#DIV/0!	1.00:0	55042
2094	17826	| transcription factor jun-B | 3726 | JUNB | 347 | P17275 | sp	NP_002220	35.21	4	1	1		218.69	316.06	400.57	0	0	0	218.69	316.06	400.57	0	0	0	1.00:1.45:1.83:0:0:0	311.78	0	311.78	0	#DIV/0!	1.00:0	35879
2052	27627	| zinc finger E-box-binding homeobox 1 isoform g | 6935 | ZEB1 | 906 | nan | nan	NP_001310579	35.21	2	1	1		442.11	283.29	488.32	0	0	0	442.11	283.29	488.32	0	0	0	1.00:0.64:1.10:0:0:0	404.57	0	404.57	0	#DIV/0!	1.00:0	99324
725	5328	| tropomyosin alpha-4 chain isoform X3 | 7171 | TPM4 | 248 | nan | nan	XP_005260099	35.18	15	3	3	Acetylation (Protein N-term)	2264.1	1435.9	1893.3	0	0	0	2264.1	1435.9	1893.3	0	0	0	1.00:0.63:0.84:0:0:0	2014.6	0	2014.6	0	#DIV/0!	1.00:0	28609
1199	8391	| EH domain-binding protein 1-like protein 1 isoform 1 | 254102 | EHBP1L1 | 1523 | Q8N3D4 | sp	NP_001092879	35.17	2	2	2		597.56	562.98	359.52	0	0	0	597.56	562.98	359.52	0	0	0	1.00:0.94:0.60:0:0:0	604.75	0	604.75	0	#DIV/0!	1.00:0	161854
1199	8392	| EH domain-binding protein 1-like protein 1 isoform X1 | 254102 | EHBP1L1 | 1535 | nan | nan	XP_006718549	35.17	2	2	2		597.56	562.98	359.52	0	0	0	597.56	562.98	359.52	0	0	0	1.00:0.94:0.60:0:0:0	604.75	0	604.75	0	#DIV/0!	1.00:0	163076
1199	8393	| EH domain-binding protein 1-like protein 1 isoform X2 | 254102 | EHBP1L1 | 1502 | nan | nan	XP_016872956	35.17	2	2	2		597.56	562.98	359.52	0	0	0	597.56	562.98	359.52	0	0	0	1.00:0.94:0.60:0:0:0	604.75	0	604.75	0	#DIV/0!	1.00:0	158791
1199	8394	| EH domain-binding protein 1-like protein 1 isoform X2 | 254102 | EHBP1L1 | 1502 | nan | nan	XP_016872957	35.17	2	2	2		597.56	562.98	359.52	0	0	0	597.56	562.98	359.52	0	0	0	1.00:0.94:0.60:0:0:0	604.75	0	604.75	0	#DIV/0!	1.00:0	158791
1965	16063	| protein SEC13 homolog isoform 1 | 6396 | SEC13 | 322 | P55735 | sp	NP_899195	35.13	10	2	2	Carbamidomethylation	889.85	781.62	860.93	0	299.85	319.41	889.85	781.62	860.93	0	299.85	319.41	1.00:0.88:0.97:0:0.34:0.36	844.13	309.63	844.13	309.63	2.72625	1.00:0.37	35541
1965	16354	| protein SEC13 homolog isoform X5 | 6396 | SEC13 | 308 | nan | nan	XP_024309472	35.13	10	2	2	Carbamidomethylation	889.85	781.62	860.93	0	299.85	319.41	889.85	781.62	860.93	0	299.85	319.41	1.00:0.88:0.97:0:0.34:0.36	844.13	309.63	844.13	309.63	2.72625	1.00:0.37	34012
1965	16355	| protein SEC13 homolog isoform 2 | 6396 | SEC13 | 308 | P55735 | sp	NP_001129704	35.13	10	2	2	Carbamidomethylation	889.85	781.62	860.93	0	299.85	319.41	889.85	781.62	860.93	0	299.85	319.41	1.00:0.88:0.97:0:0.34:0.36	844.13	309.63	844.13	309.63	2.72625	1.00:0.37	34012
1965	16356	| protein SEC13 homolog isoform X3 | 6396 | SEC13 | 325 | P55735 | sp	XP_005265436	35.13	10	2	2	Carbamidomethylation	889.85	781.62	860.93	0	299.85	319.41	889.85	781.62	860.93	0	299.85	319.41	1.00:0.88:0.97:0:0.34:0.36	844.13	309.63	844.13	309.63	2.72625	1.00:0.37	35857
1965	16357	| protein SEC13 homolog isoform 4 | 6396 | SEC13 | 325 | P55735 | sp	NP_109598	35.13	10	2	2	Carbamidomethylation	889.85	781.62	860.93	0	299.85	319.41	889.85	781.62	860.93	0	299.85	319.41	1.00:0.88:0.97:0:0.34:0.36	844.13	309.63	844.13	309.63	2.72625	1.00:0.37	35857
1965	16358	| protein SEC13 homolog isoform X2 | 6396 | SEC13 | 340 | nan | nan	XP_024309470	35.13	9	2	2	Carbamidomethylation	889.85	781.62	860.93	0	299.85	319.41	889.85	781.62	860.93	0	299.85	319.41	1.00:0.88:0.97:0:0.34:0.36	844.13	309.63	844.13	309.63	2.72625	1.00:0.37	37545
1965	16359	| protein SEC13 homolog isoform X2 | 6396 | SEC13 | 340 | nan | nan	XP_024309469	35.13	9	2	2	Carbamidomethylation	889.85	781.62	860.93	0	299.85	319.41	889.85	781.62	860.93	0	299.85	319.41	1.00:0.88:0.97:0:0.34:0.36	844.13	309.63	844.13	309.63	2.72625	1.00:0.37	37545
1965	16360	| protein SEC13 homolog isoform 3 | 6396 | SEC13 | 368 | P55735 | sp	NP_001129498	35.13	9	2	2	Carbamidomethylation	889.85	781.62	860.93	0	299.85	319.41	889.85	781.62	860.93	0	299.85	319.41	1.00:0.88:0.97:0:0.34:0.36	844.13	309.63	844.13	309.63	2.72625	1.00:0.37	40747
1965	16361	| protein SEC13 homolog isoform X1 | 6396 | SEC13 | 368 | P55735 | sp	XP_016862508	35.13	9	2	2	Carbamidomethylation	889.85	781.62	860.93	0	299.85	319.41	889.85	781.62	860.93	0	299.85	319.41	1.00:0.88:0.97:0:0.34:0.36	844.13	309.63	844.13	309.63	2.72625	1.00:0.37	40747
1965	16362	| protein SEC13 homolog isoform X1 | 6396 | SEC13 | 368 | nan | nan	XP_024309471	35.13	9	2	2	Carbamidomethylation	889.85	781.62	860.93	0	299.85	319.41	889.85	781.62	860.93	0	299.85	319.41	1.00:0.88:0.97:0:0.34:0.36	844.13	309.63	844.13	309.63	2.72625	1.00:0.37	40747
1620	12321	| lactoylglutathione lyase | 2739 | GLO1 | 184 | Q04760 | sp	NP_006699	35.13	21	3	3		1763.4	1597.6	1665.2	0	358.29	360.33	1763.4	1597.6	1665.2	0	358.29	360.33	1.00:0.91:0.94:0:0.20:0.20	1969.5	359.31	1969.5	359.31	5.48134	1.00:0.18	20778
273	3262	| FAS-associated factor 2 | 23197 | FAF2 | 445 | Q96CS3 | sp	NP_055428	35.11	43	12	12	Carbamidomethylation	8349.5	8569.1	11538	0	0	409.25	3469.2	2875.9	4371.6	0	0	0	1.00:0.83:1.26:0:0:0	10204	409.25	3981.5	0	#DIV/0!	1.00:0	52624
120	2782	| heterogeneous nuclear ribonucleoprotein H isoform X5 | 3187 | HNRNPH1 | 439 | nan | nan	XP_016864907	35.09	34	9	9	Carbamidomethylation; Acetylation (Protein N-term); Oxidation (M)	49967	42965	52415	4928.7	4274.7	7068.1	36331	31236	38354	4409.1	3456	4983.7	1.00:0.86:1.06:0.12:0.10:0.14	49146	6435	35307	4545.1	7.76815	1.00:0.13	48263
120	2783	| heterogeneous nuclear ribonucleoprotein H isoform X4 | 3187 | HNRNPH1 | 449 | nan | nan	XP_024301807	35.09	34	9	9	Carbamidomethylation; Acetylation (Protein N-term); Oxidation (M)	49967	42965	52415	4928.7	4274.7	7068.1	36331	31236	38354	4409.1	3456	4983.7	1.00:0.86:1.06:0.12:0.10:0.14	49146	6435	35307	4545.1	7.76815	1.00:0.13	49229
120	2784	| heterogeneous nuclear ribonucleoprotein H isoform X4 | 3187 | HNRNPH1 | 449 | P31943 | sp	XP_016864906	35.09	34	9	9	Carbamidomethylation; Acetylation (Protein N-term); Oxidation (M)	49967	42965	52415	4928.7	4274.7	7068.1	36331	31236	38354	4409.1	3456	4983.7	1.00:0.86:1.06:0.12:0.10:0.14	49146	6435	35307	4545.1	7.76815	1.00:0.13	49229
120	2785	| heterogeneous nuclear ribonucleoprotein H | 3187 | HNRNPH1 | 449 | P31943 | sp	NP_005511	35.09	34	9	9	Carbamidomethylation; Acetylation (Protein N-term); Oxidation (M)	49967	42965	52415	4928.7	4274.7	7068.1	36331	31236	38354	4409.1	3456	4983.7	1.00:0.86:1.06:0.12:0.10:0.14	49146	6435	35307	4545.1	7.76815	1.00:0.13	49229
120	2786	| heterogeneous nuclear ribonucleoprotein H isoform X4 | 3187 | HNRNPH1 | 449 | P31943 | sp	XP_016864904	35.09	34	9	9	Carbamidomethylation; Acetylation (Protein N-term); Oxidation (M)	49967	42965	52415	4928.7	4274.7	7068.1	36331	31236	38354	4409.1	3456	4983.7	1.00:0.86:1.06:0.12:0.10:0.14	49146	6435	35307	4545.1	7.76815	1.00:0.13	49229
120	2787	| heterogeneous nuclear ribonucleoprotein H isoform X4 | 3187 | HNRNPH1 | 449 | P31943 | sp	XP_016864905	35.09	34	9	9	Carbamidomethylation; Acetylation (Protein N-term); Oxidation (M)	49967	42965	52415	4928.7	4274.7	7068.1	36331	31236	38354	4409.1	3456	4983.7	1.00:0.86:1.06:0.12:0.10:0.14	49146	6435	35307	4545.1	7.76815	1.00:0.13	49229
120	2788	| heterogeneous nuclear ribonucleoprotein H | 3187 | HNRNPH1 | 449 | P31943 | sp	NP_001244222	35.09	34	9	9	Carbamidomethylation; Acetylation (Protein N-term); Oxidation (M)	49967	42965	52415	4928.7	4274.7	7068.1	36331	31236	38354	4409.1	3456	4983.7	1.00:0.86:1.06:0.12:0.10:0.14	49146	6435	35307	4545.1	7.76815	1.00:0.13	49229
120	2789	| heterogeneous nuclear ribonucleoprotein H isoform X2 | 3187 | HNRNPH1 | 462 | nan | nan	XP_011532849	35.09	33	9	9	Carbamidomethylation; Acetylation (Protein N-term); Oxidation (M)	49967	42965	52415	4928.7	4274.7	7068.1	36331	31236	38354	4409.1	3456	4983.7	1.00:0.86:1.06:0.12:0.10:0.14	49146	6435	35307	4545.1	7.76815	1.00:0.13	50264
120	2790	| heterogeneous nuclear ribonucleoprotein H isoform X1 | 3187 | HNRNPH1 | 472 | G8JLB6 | tr	XP_005265953	35.09	32	9	9	Carbamidomethylation; Acetylation (Protein N-term); Oxidation (M)	49967	42965	52415	4928.7	4274.7	7068.1	36331	31236	38354	4409.1	3456	4983.7	1.00:0.86:1.06:0.12:0.10:0.14	49146	6435	35307	4545.1	7.76815	1.00:0.13	51230
120	2791	| heterogeneous nuclear ribonucleoprotein H isoform X1 | 3187 | HNRNPH1 | 472 | G8JLB6 | tr	XP_011532844	35.09	32	9	9	Carbamidomethylation; Acetylation (Protein N-term); Oxidation (M)	49967	42965	52415	4928.7	4274.7	7068.1	36331	31236	38354	4409.1	3456	4983.7	1.00:0.86:1.06:0.12:0.10:0.14	49146	6435	35307	4545.1	7.76815	1.00:0.13	51230
120	2792	| heterogeneous nuclear ribonucleoprotein H isoform X1 | 3187 | HNRNPH1 | 472 | G8JLB6 | tr	XP_011532848	35.09	32	9	9	Carbamidomethylation; Acetylation (Protein N-term); Oxidation (M)	49967	42965	52415	4928.7	4274.7	7068.1	36331	31236	38354	4409.1	3456	4983.7	1.00:0.86:1.06:0.12:0.10:0.14	49146	6435	35307	4545.1	7.76815	1.00:0.13	51230
120	2793	| heterogeneous nuclear ribonucleoprotein H isoform X1 | 3187 | HNRNPH1 | 472 | G8JLB6 | tr	XP_005265952	35.09	32	9	9	Carbamidomethylation; Acetylation (Protein N-term); Oxidation (M)	49967	42965	52415	4928.7	4274.7	7068.1	36331	31236	38354	4409.1	3456	4983.7	1.00:0.86:1.06:0.12:0.10:0.14	49146	6435	35307	4545.1	7.76815	1.00:0.13	51230
120	2794	| heterogeneous nuclear ribonucleoprotein H isoform X1 | 3187 | HNRNPH1 | 472 | G8JLB6 | tr	XP_011532847	35.09	32	9	9	Carbamidomethylation; Acetylation (Protein N-term); Oxidation (M)	49967	42965	52415	4928.7	4274.7	7068.1	36331	31236	38354	4409.1	3456	4983.7	1.00:0.86:1.06:0.12:0.10:0.14	49146	6435	35307	4545.1	7.76815	1.00:0.13	51230
120	2795	| heterogeneous nuclear ribonucleoprotein H isoform X1 | 3187 | HNRNPH1 | 472 | G8JLB6 | tr	XP_011532846	35.09	32	9	9	Carbamidomethylation; Acetylation (Protein N-term); Oxidation (M)	49967	42965	52415	4928.7	4274.7	7068.1	36331	31236	38354	4409.1	3456	4983.7	1.00:0.86:1.06:0.12:0.10:0.14	49146	6435	35307	4545.1	7.76815	1.00:0.13	51230
614	3342	| protein Spindly isoform b | 54908 | SPDL1 | 605 | Q96EA4 | sp	NP_060255	35.08	15	7	7	Carbamidomethylation	4380	3611.5	5097.7	0	0	0	2788.5	2182.4	3356.8	0	0	0	1.00:0.78:1.20:0:0:0	4483.2	0	2775.9	0	#DIV/0!	1.00:0	70172
614	3343	| protein Spindly isoform b | 54908 | SPDL1 | 605 | Q96EA4 | sp	NP_001316570	35.08	15	7	7	Carbamidomethylation	4380	3611.5	5097.7	0	0	0	2788.5	2182.4	3356.8	0	0	0	1.00:0.78:1.20:0:0:0	4483.2	0	2775.9	0	#DIV/0!	1.00:0	70172
614	3347	| protein Spindly isoform a | 54908 | SPDL1 | 622 | nan | nan	NP_001316568	35.08	15	7	7	Carbamidomethylation	4380	3611.5	5097.7	0	0	0	2788.5	2182.4	3356.8	0	0	0	1.00:0.78:1.20:0:0:0	4483.2	0	2775.9	0	#DIV/0!	1.00:0	72044
614	3348	| protein Spindly isoform X1 | 54908 | SPDL1 | 622 | nan | nan	XP_011532891	35.08	15	7	7	Carbamidomethylation	4380	3611.5	5097.7	0	0	0	2788.5	2182.4	3356.8	0	0	0	1.00:0.78:1.20:0:0:0	4483.2	0	2775.9	0	#DIV/0!	1.00:0	72044
614	3349	| protein Spindly isoform a | 54908 | SPDL1 | 622 | nan | nan	NP_001316569	35.08	15	7	7	Carbamidomethylation	4380	3611.5	5097.7	0	0	0	2788.5	2182.4	3356.8	0	0	0	1.00:0.78:1.20:0:0:0	4483.2	0	2775.9	0	#DIV/0!	1.00:0	72044
614	3350	| protein Spindly isoform X1 | 54908 | SPDL1 | 622 | nan | nan	XP_011532889	35.08	15	7	7	Carbamidomethylation	4380	3611.5	5097.7	0	0	0	2788.5	2182.4	3356.8	0	0	0	1.00:0.78:1.20:0:0:0	4483.2	0	2775.9	0	#DIV/0!	1.00:0	72044
614	3351	| protein Spindly isoform X1 | 54908 | SPDL1 | 622 | nan | nan	XP_011532890	35.08	15	7	7	Carbamidomethylation	4380	3611.5	5097.7	0	0	0	2788.5	2182.4	3356.8	0	0	0	1.00:0.78:1.20:0:0:0	4483.2	0	2775.9	0	#DIV/0!	1.00:0	72044
961	10057	| peroxisomal biogenesis factor 3 | 8504 | PEX3 | 373 | P56589 | sp	NP_003621	35.05	11	3	3	Carbamidomethylation	504.49	311.48	1189.2	0	0	0	504.49	311.48	1189.2	0	0	0	1.00:0.62:2.36:0:0:0	1073	0	1073	0	#DIV/0!	1.00:0	42140
596	2424	| plastin-3 isoform 1 | 5358 | PLS3 | 630 | P13797 | sp	NP_005023	34.96	5	3	3		562.22	1164.6	1392.6	0	0	0	562.22	801.71	923.87	0	0	0	1.00:1.43:1.64:0:0:0	1304.1	0	888.33	0	#DIV/0!	1.00:0	70811
596	2425	| plastin-3 isoform 1 | 5358 | PLS3 | 630 | P13797 | sp	NP_001129497	34.96	5	3	3		562.22	1164.6	1392.6	0	0	0	562.22	801.71	923.87	0	0	0	1.00:1.43:1.64:0:0:0	1304.1	0	888.33	0	#DIV/0!	1.00:0	70811
596	2541	| plastin-3 isoform 4 | 5358 | PLS3 | 585 | P13797 | sp	NP_001269267	34.96	5	3	3		562.22	1164.6	1392.6	0	0	0	562.22	801.71	923.87	0	0	0	1.00:1.43:1.64:0:0:0	1304.1	0	888.33	0	#DIV/0!	1.00:0	65632
596	2544	| plastin-3 isoform 3 | 5358 | PLS3 | 617 | P13797 | sp	NP_001269266	34.96	5	3	3		562.22	1164.6	1392.6	0	0	0	562.22	801.71	923.87	0	0	0	1.00:1.43:1.64:0:0:0	1304.1	0	888.33	0	#DIV/0!	1.00:0	69351
1921	13491	| box C/D snoRNA protein 1 isoform X2 | 54680 | ZNHIT6 | 418 | nan | nan	XP_024303504	34.94	11	2	2		1173.8	0	825.99	0	0	0	1173.8	0	825.99	0	0	0	1.00:0:0.70:0:0:0	1166.1	0	1166.1	0	#DIV/0!	1.00:0	47863
1921	13492	| box C/D snoRNA protein 1 isoform X1 | 54680 | ZNHIT6 | 421 | nan | nan	XP_011539916	34.94	11	2	2		1173.8	0	825.99	0	0	0	1173.8	0	825.99	0	0	0	1.00:0:0.70:0:0:0	1166.1	0	1166.1	0	#DIV/0!	1.00:0	48289
1921	13493	| box C/D snoRNA protein 1 isoform 2 | 54680 | ZNHIT6 | 431 | Q9NWK9 | sp	NP_001164141	34.94	10	2	2		1173.8	0	825.99	0	0	0	1173.8	0	825.99	0	0	0	1.00:0:0.70:0:0:0	1166.1	0	1166.1	0	#DIV/0!	1.00:0	49487
1921	13494	| box C/D snoRNA protein 1 isoform 1 | 54680 | ZNHIT6 | 470 | Q9NWK9 | sp	NP_060423	34.94	10	2	2		1173.8	0	825.99	0	0	0	1173.8	0	825.99	0	0	0	1.00:0:0.70:0:0:0	1166.1	0	1166.1	0	#DIV/0!	1.00:0	53918
1221	8071	| 26S proteasome non-ATPase regulatory subunit 11 | 5717 | PSMD11 | 422 | O00231 | sp	NP_002806	34.93	12	4	4		812.39	689.8	1360.4	0	0	0	812.39	689.8	1126.9	0	0	0	1.00:0.85:1.39:0:0:0	1315.9	0	1082.5	0	#DIV/0!	1.00:0	47464
1221	8072	| 26S proteasome non-ATPase regulatory subunit 11 | 5717 | PSMD11 | 422 | O00231 | sp	NP_001257411	34.93	12	4	4		812.39	689.8	1360.4	0	0	0	812.39	689.8	1126.9	0	0	0	1.00:0.85:1.39:0:0:0	1315.9	0	1082.5	0	#DIV/0!	1.00:0	47464
710	6388	| coiled-coil domain-containing protein 86 | 79080 | CCDC86 | 360 | Q9H6F5 | sp	NP_077003	34.93	26	6	6	Acetylation (Protein N-term)	3324.8	2853.5	4899	0	0	0	2046.6	1991	2942.6	0	0	0	1.00:0.97:1.44:0:0:0	3936.2	0	2326.7	0	#DIV/0!	1.00:0	40236
1520	14013	| prefoldin subunit 4 | 5203 | PFDN4 | 134 | Q9NQP4 | sp	NP_002614	34.9	28	3	3		1226.7	1579.3	1937.9	0	0	0	1226.7	1579.3	1937.9	0	0	0	1.00:1.29:1.58:0:0:0	1770.1	0	1770.1	0	#DIV/0!	1.00:0	15314
1757	10837	| synemin isoform A | 23336 | SYNM | 1565 | O15061 | sp	NP_663780	34.87	2	2	2		597.82	357.32	538.4	0	0	0	597.82	357.32	538.4	0	0	0	1.00:0.60:0.90:0:0:0	576.68	0	576.68	0	#DIV/0!	1.00:0	172867
1464	13150	| integrin-linked protein kinase isoform 2 | 3611 | ILK | 391 | Q13418 | sp	NP_001265370	34.82	7	2	2		1277.9	1122.1	1760.5	0	0	0	1277.9	1122.1	1760.5	0	0	0	1.00:0.88:1.38:0:0:0	1386.8	0	1386.8	0	#DIV/0!	1.00:0	44349
1464	13347	| integrin-linked protein kinase isoform 1 | 3611 | ILK | 452 | Q13418 | sp	NP_001014795	34.82	6	2	2		1277.9	1122.1	1760.5	0	0	0	1277.9	1122.1	1760.5	0	0	0	1.00:0.88:1.38:0:0:0	1386.8	0	1386.8	0	#DIV/0!	1.00:0	51419
1464	13348	| integrin-linked protein kinase isoform X2 | 3611 | ILK | 452 | Q13418 | sp	XP_005252961	34.82	6	2	2		1277.9	1122.1	1760.5	0	0	0	1277.9	1122.1	1760.5	0	0	0	1.00:0.88:1.38:0:0:0	1386.8	0	1386.8	0	#DIV/0!	1.00:0	51419
1464	13349	| integrin-linked protein kinase isoform 1 | 3611 | ILK | 452 | Q13418 | sp	NP_001014794	34.82	6	2	2		1277.9	1122.1	1760.5	0	0	0	1277.9	1122.1	1760.5	0	0	0	1.00:0.88:1.38:0:0:0	1386.8	0	1386.8	0	#DIV/0!	1.00:0	51419
1464	13351	| integrin-linked protein kinase isoform 1 | 3611 | ILK | 452 | Q13418 | sp	NP_004508	34.82	6	2	2		1277.9	1122.1	1760.5	0	0	0	1277.9	1122.1	1760.5	0	0	0	1.00:0.88:1.38:0:0:0	1386.8	0	1386.8	0	#DIV/0!	1.00:0	51419
1464	13352	| integrin-linked protein kinase isoform X2 | 3611 | ILK | 452 | Q13418 | sp	XP_011518367	34.82	6	2	2		1277.9	1122.1	1760.5	0	0	0	1277.9	1122.1	1760.5	0	0	0	1.00:0.88:1.38:0:0:0	1386.8	0	1386.8	0	#DIV/0!	1.00:0	51419
1464	13353	| integrin-linked protein kinase isoform X1 | 3611 | ILK | 483 | nan | nan	XP_024304264	34.82	6	2	2		1277.9	1122.1	1760.5	0	0	0	1277.9	1122.1	1760.5	0	0	0	1.00:0.88:1.38:0:0:0	1386.8	0	1386.8	0	#DIV/0!	1.00:0	54612
1464	13354	| integrin-linked protein kinase isoform X1 | 3611 | ILK | 483 | nan | nan	XP_024304262	34.82	6	2	2		1277.9	1122.1	1760.5	0	0	0	1277.9	1122.1	1760.5	0	0	0	1.00:0.88:1.38:0:0:0	1386.8	0	1386.8	0	#DIV/0!	1.00:0	54612
1464	13355	| integrin-linked protein kinase isoform X1 | 3611 | ILK | 483 | nan | nan	XP_024304263	34.82	6	2	2		1277.9	1122.1	1760.5	0	0	0	1277.9	1122.1	1760.5	0	0	0	1.00:0.88:1.38:0:0:0	1386.8	0	1386.8	0	#DIV/0!	1.00:0	54612
1464	13356	| integrin-linked protein kinase isoform X1 | 3611 | ILK | 483 | nan | nan	XP_024304265	34.82	6	2	2		1277.9	1122.1	1760.5	0	0	0	1277.9	1122.1	1760.5	0	0	0	1.00:0.88:1.38:0:0:0	1386.8	0	1386.8	0	#DIV/0!	1.00:0	54612
1464	13940	| integrin-linked protein kinase isoform 3 | 3611 | ILK | 318 | Q13418 | sp	NP_001265371	34.82	9	2	2		1277.9	1122.1	1760.5	0	0	0	1277.9	1122.1	1760.5	0	0	0	1.00:0.88:1.38:0:0:0	1386.8	0	1386.8	0	#DIV/0!	1.00:0	36467
1464	13941	| integrin-linked protein kinase isoform X5 | 3611 | ILK | 318 | Q13418 | sp	XP_005252962	34.82	9	2	2		1277.9	1122.1	1760.5	0	0	0	1277.9	1122.1	1760.5	0	0	0	1.00:0.88:1.38:0:0:0	1386.8	0	1386.8	0	#DIV/0!	1.00:0	36467
1464	13942	| integrin-linked protein kinase isoform X4 | 3611 | ILK | 349 | nan | nan	XP_024304268	34.82	8	2	2		1277.9	1122.1	1760.5	0	0	0	1277.9	1122.1	1760.5	0	0	0	1.00:0.88:1.38:0:0:0	1386.8	0	1386.8	0	#DIV/0!	1.00:0	39660
1464	13943	| integrin-linked protein kinase isoform X3 | 3611 | ILK | 401 | nan | nan	XP_016873161	34.82	7	2	2		1277.9	1122.1	1760.5	0	0	0	1277.9	1122.1	1760.5	0	0	0	1.00:0.88:1.38:0:0:0	1386.8	0	1386.8	0	#DIV/0!	1.00:0	45648
1464	13944	| integrin-linked protein kinase isoform X3 | 3611 | ILK | 401 | nan | nan	XP_024304266	34.82	7	2	2		1277.9	1122.1	1760.5	0	0	0	1277.9	1122.1	1760.5	0	0	0	1.00:0.88:1.38:0:0:0	1386.8	0	1386.8	0	#DIV/0!	1.00:0	45648
1464	13945	| integrin-linked protein kinase isoform X3 | 3611 | ILK | 401 | nan | nan	XP_024304267	34.82	7	2	2		1277.9	1122.1	1760.5	0	0	0	1277.9	1122.1	1760.5	0	0	0	1.00:0.88:1.38:0:0:0	1386.8	0	1386.8	0	#DIV/0!	1.00:0	45648
1511	12129	| nuclear valosin-containing protein-like isoform 3 | 4931 | NVL | 667 | O15381 | sp	NP_001230075	34.81	10	4	4	Carbamidomethylation	1147.3	705.33	1225.8	0	0	0	1147.3	705.33	948.47	0	0	0	1.00:0.61:0.83:0:0:0	1296.4	0	1019.1	0	#DIV/0!	1.00:0	73280
1511	12130	| nuclear valosin-containing protein-like isoform X12 | 4931 | NVL | 738 | nan | nan	XP_016856875	34.81	9	4	4	Carbamidomethylation	1147.3	705.33	1225.8	0	0	0	1147.3	705.33	948.47	0	0	0	1.00:0.61:0.83:0:0:0	1296.4	0	1019.1	0	#DIV/0!	1.00:0	81361
1511	12131	| nuclear valosin-containing protein-like isoform 2 | 4931 | NVL | 750 | O15381 | sp	NP_996671	34.81	9	4	4	Carbamidomethylation	1147.3	705.33	1225.8	0	0	0	1147.3	705.33	948.47	0	0	0	1.00:0.61:0.83:0:0:0	1296.4	0	1019.1	0	#DIV/0!	1.00:0	82746
1511	12132	| nuclear valosin-containing protein-like isoform X11 | 4931 | NVL | 750 | nan | nan	XP_024303135	34.81	9	4	4	Carbamidomethylation	1147.3	705.33	1225.8	0	0	0	1147.3	705.33	948.47	0	0	0	1.00:0.61:0.83:0:0:0	1296.4	0	1019.1	0	#DIV/0!	1.00:0	82746
1511	12133	| nuclear valosin-containing protein-like isoform X10 | 4931 | NVL | 756 | nan | nan	XP_016856874	34.81	8	4	4	Carbamidomethylation	1147.3	705.33	1225.8	0	0	0	1147.3	705.33	948.47	0	0	0	1.00:0.61:0.83:0:0:0	1296.4	0	1019.1	0	#DIV/0!	1.00:0	83560
1511	12134	| nuclear valosin-containing protein-like isoform X9 | 4931 | NVL | 765 | nan | nan	XP_011542501	34.81	8	4	4	Carbamidomethylation	1147.3	705.33	1225.8	0	0	0	1147.3	705.33	948.47	0	0	0	1.00:0.61:0.83:0:0:0	1296.4	0	1019.1	0	#DIV/0!	1.00:0	84061
1511	12135	| nuclear valosin-containing protein-like isoform 4 | 4931 | NVL | 765 | O15381 | sp	NP_001230076	34.81	8	4	4	Carbamidomethylation	1147.3	705.33	1225.8	0	0	0	1147.3	705.33	948.47	0	0	0	1.00:0.61:0.83:0:0:0	1296.4	0	1019.1	0	#DIV/0!	1.00:0	85038
1511	12136	| nuclear valosin-containing protein-like isoform X9 | 4931 | NVL | 765 | nan | nan	XP_011542502	34.81	8	4	4	Carbamidomethylation	1147.3	705.33	1225.8	0	0	0	1147.3	705.33	948.47	0	0	0	1.00:0.61:0.83:0:0:0	1296.4	0	1019.1	0	#DIV/0!	1.00:0	84061
1511	12137	| nuclear valosin-containing protein-like isoform X8 | 4931 | NVL | 777 | nan | nan	XP_011542500	34.81	8	4	4	Carbamidomethylation	1147.3	705.33	1225.8	0	0	0	1147.3	705.33	948.47	0	0	0	1.00:0.61:0.83:0:0:0	1296.4	0	1019.1	0	#DIV/0!	1.00:0	85446
1511	12138	| nuclear valosin-containing protein-like isoform X7 | 4931 | NVL | 789 | nan | nan	XP_016856873	34.81	8	4	4	Carbamidomethylation	1147.3	705.33	1225.8	0	0	0	1147.3	705.33	948.47	0	0	0	1.00:0.61:0.83:0:0:0	1296.4	0	1019.1	0	#DIV/0!	1.00:0	87087
1511	12139	| nuclear valosin-containing protein-like isoform X6 | 4931 | NVL | 812 | nan | nan	XP_016856872	34.81	8	4	4	Carbamidomethylation	1147.3	705.33	1225.8	0	0	0	1147.3	705.33	948.47	0	0	0	1.00:0.61:0.83:0:0:0	1296.4	0	1019.1	0	#DIV/0!	1.00:0	89663
1511	12140	| nuclear valosin-containing protein-like isoform X5 | 4931 | NVL | 839 | nan | nan	XP_016856871	34.81	8	4	4	Carbamidomethylation	1147.3	705.33	1225.8	0	0	0	1147.3	705.33	948.47	0	0	0	1.00:0.61:0.83:0:0:0	1296.4	0	1019.1	0	#DIV/0!	1.00:0	92363
1511	12141	| nuclear valosin-containing protein-like isoform X5 | 4931 | NVL | 839 | nan | nan	XP_016856870	34.81	8	4	4	Carbamidomethylation	1147.3	705.33	1225.8	0	0	0	1147.3	705.33	948.47	0	0	0	1.00:0.61:0.83:0:0:0	1296.4	0	1019.1	0	#DIV/0!	1.00:0	92363
1511	12142	| nuclear valosin-containing protein-like isoform 1 | 4931 | NVL | 856 | O15381 | sp	NP_002524	34.81	7	4	4	Carbamidomethylation	1147.3	705.33	1225.8	0	0	0	1147.3	705.33	948.47	0	0	0	1.00:0.61:0.83:0:0:0	1296.4	0	1019.1	0	#DIV/0!	1.00:0	95051
1511	12143	| nuclear valosin-containing protein-like isoform X4 | 4931 | NVL | 883 | nan | nan	XP_011542498	34.81	7	4	4	Carbamidomethylation	1147.3	705.33	1225.8	0	0	0	1147.3	705.33	948.47	0	0	0	1.00:0.61:0.83:0:0:0	1296.4	0	1019.1	0	#DIV/0!	1.00:0	97751
1511	12144	| nuclear valosin-containing protein-like isoform X3 | 4931 | NVL | 889 | nan | nan	XP_016856869	34.81	7	4	4	Carbamidomethylation	1147.3	705.33	1225.8	0	0	0	1147.3	705.33	948.47	0	0	0	1.00:0.61:0.83:0:0:0	1296.4	0	1019.1	0	#DIV/0!	1.00:0	97896
1511	12145	| nuclear valosin-containing protein-like isoform X2 | 4931 | NVL | 890 | nan | nan	XP_016856868	34.81	7	4	4	Carbamidomethylation	1147.3	705.33	1225.8	0	0	0	1147.3	705.33	948.47	0	0	0	1.00:0.61:0.83:0:0:0	1296.4	0	1019.1	0	#DIV/0!	1.00:0	98645
1511	12146	| nuclear valosin-containing protein-like isoform X1 | 4931 | NVL | 917 | nan | nan	XP_016856867	34.81	7	4	4	Carbamidomethylation	1147.3	705.33	1225.8	0	0	0	1147.3	705.33	948.47	0	0	0	1.00:0.61:0.83:0:0:0	1296.4	0	1019.1	0	#DIV/0!	1.00:0	101345
1545	12864	| rho guanine nucleotide exchange factor 1 isoform 3 | 9138 | ARHGEF1 | 879 | Q92888 | sp	NP_945328	34.79	6	3	3	Carbamidomethylation	594.05	668.41	965.61	0	0	0	594.05	668.41	965.61	0	0	0	1.00:1.13:1.63:0:0:0	906.3	0	906.3	0	#DIV/0!	1.00:0	98768
1545	12865	| rho guanine nucleotide exchange factor 1 isoform 2 | 9138 | ARHGEF1 | 912 | Q92888 | sp	NP_004697	34.79	5	3	3	Carbamidomethylation	594.05	668.41	965.61	0	0	0	594.05	668.41	965.61	0	0	0	1.00:1.13:1.63:0:0:0	906.3	0	906.3	0	#DIV/0!	1.00:0	102435
1545	12866	| rho guanine nucleotide exchange factor 1 isoform 1 | 9138 | ARHGEF1 | 927 | Q92888 | sp	NP_945353	34.79	5	3	3	Carbamidomethylation	594.05	668.41	965.61	0	0	0	594.05	668.41	965.61	0	0	0	1.00:1.13:1.63:0:0:0	906.3	0	906.3	0	#DIV/0!	1.00:0	104066
794	7995	| chromobox protein homolog 5 | 23468 | CBX5 | 191 | P45973 | sp	NP_001120794	34.76	37	6	6	Carbamidomethylation	5220.1	3827.4	6839.6	0	0	0	4431.2	3428.2	5062.5	0	0	0	1.00:0.77:1.14:0:0:0	5669.1	0	4307.3	0	#DIV/0!	1.00:0	22225
794	7996	| chromobox protein homolog 5 | 23468 | CBX5 | 191 | P45973 | sp	NP_001120793	34.76	37	6	6	Carbamidomethylation	5220.1	3827.4	6839.6	0	0	0	4431.2	3428.2	5062.5	0	0	0	1.00:0.77:1.14:0:0:0	5669.1	0	4307.3	0	#DIV/0!	1.00:0	22225
794	7997	| chromobox protein homolog 5 | 23468 | CBX5 | 191 | P45973 | sp	NP_036249	34.76	37	6	6	Carbamidomethylation	5220.1	3827.4	6839.6	0	0	0	4431.2	3428.2	5062.5	0	0	0	1.00:0.77:1.14:0:0:0	5669.1	0	4307.3	0	#DIV/0!	1.00:0	22225
2031	16383	| mitochondrial ribosome-associated GTPase 1 | 92170 | MTG1 | 334 | Q9BT17 | sp	NP_612393	34.75	3	1	1		473.21	339.88	583.5	0	0	0	473.21	339.88	583.5	0	0	0	1.00:0.72:1.23:0:0:0	465.53	0	465.53	0	#DIV/0!	1.00:0	37237
1690	10011	| succinate dehydrogenase | 6390 | SDHB | 280 | P21912 | sp	NP_002991	34.72	12	3	3		2015.1	1580.6	1286.2	0	0	0	2015.1	1580.6	1286.2	0	0	0	1.00:0.78:0.64:0:0:0	1785.6	0	1785.6	0	#DIV/0!	1.00:0	31630
1432	11710	| fructose-2 6-bisphosphatase TIGAR | 57103 | TIGAR | 270 | Q9NQ88 | sp	NP_065108	34.72	17	3	3	Carbamidomethylation	1064.1	1532.3	988.39	0	0	0	1064.1	1532.3	988.39	0	0	0	1.00:1.44:0.93:0:0:0	1708	0	1708	0	#DIV/0!	1.00:0	30063
732	6722	| grpE protein homolog 1 mitochondrial precursor | 80273 | GRPEL1 | 217 | Q9HAV7 | sp	NP_079472	34.71	46	8	8		11874	9874.6	13558	0	0	0	8725.5	6863.9	9781	0	0	0	1.00:0.79:1.12:0:0:0	11769	0	8456.8	0	#DIV/0!	1.00:0	24279
379	2214	| origin recognition complex subunit 3 isoform 2 | 23595 | ORC3 | 711 | Q9UBD5 | sp	NP_036513	34.69	14	7	7	Carbamidomethylation	3090.9	3840.8	4627.6	484.25	654.83	612.32	2609.7	2047.2	2669.4	484.25	654.83	612.32	1.00:0.78:1.02:0.19:0.25:0.23	4308.1	773.53	2442.1	773.53	3.15709	1.00:0.32	82254
379	2215	| origin recognition complex subunit 3 isoform 1 | 23595 | ORC3 | 712 | Q9UBD5 | sp	NP_862820	34.69	14	7	7	Carbamidomethylation	3090.9	3840.8	4627.6	484.25	654.83	612.32	2609.7	2047.2	2669.4	484.25	654.83	612.32	1.00:0.78:1.02:0.19:0.25:0.23	4308.1	773.53	2442.1	773.53	3.15709	1.00:0.32	82325
970	5343	| protein TASOR isoform X3 | 23272 | FAM208A | 1609 | Q9UK61 | sp	XP_011531854	34.68	4	5	5	Carbamidomethylation	939.93	814.22	1716.8	0	0	0	939.93	814.22	1299.5	0	0	0	1.00:0.87:1.38:0:0:0	1649.7	0	1232.3	0	#DIV/0!	1.00:0	182280
970	5344	| protein TASOR isoform X2 | 23272 | FAM208A | 1629 | nan | nan	XP_006713140	34.68	4	5	5	Carbamidomethylation	939.93	814.22	1716.8	0	0	0	939.93	814.22	1299.5	0	0	0	1.00:0.87:1.38:0:0:0	1649.7	0	1232.3	0	#DIV/0!	1.00:0	184368
970	5345	| protein TASOR isoform X1 | 23272 | FAM208A | 1670 | Q9UK61 | sp	XP_005265056	34.68	4	5	5	Carbamidomethylation	939.93	814.22	1716.8	0	0	0	939.93	814.22	1299.5	0	0	0	1.00:0.87:1.38:0:0:0	1649.7	0	1232.3	0	#DIV/0!	1.00:0	189030
970	5353	| protein TASOR isoform X5 | 23272 | FAM208A | 1451 | nan | nan	XP_016861520	34.68	4	5	5	Carbamidomethylation	939.93	814.22	1716.8	0	0	0	939.93	814.22	1299.5	0	0	0	1.00:0.87:1.38:0:0:0	1649.7	0	1232.3	0	#DIV/0!	1.00:0	164064
970	5354	| protein TASOR isoform X4 | 23272 | FAM208A | 1471 | nan | nan	XP_016861519	34.68	4	5	5	Carbamidomethylation	939.93	814.22	1716.8	0	0	0	939.93	814.22	1299.5	0	0	0	1.00:0.87:1.38:0:0:0	1649.7	0	1232.3	0	#DIV/0!	1.00:0	166152
970	5355	| protein TASOR isoform a | 23272 | FAM208A | 1512 | Q9UK61 | sp	NP_001106207	34.68	4	5	5	Carbamidomethylation	939.93	814.22	1716.8	0	0	0	939.93	814.22	1299.5	0	0	0	1.00:0.87:1.38:0:0:0	1649.7	0	1232.3	0	#DIV/0!	1.00:0	170814
693	3602	| WD repeat-containing protein 75 isoform 1 | 84128 | WDR75 | 830 | Q8IWA0 | sp	NP_115544	34.59	12	6	6	Carbamidomethylation	1688.1	2117.8	3431.9	0	0	0	1450.6	1380.6	2074.3	0	0	0	1.00:0.95:1.43:0:0:0	2858.5	0	1635.2	0	#DIV/0!	1.00:0	94499
924	5764	| histone-lysine N-methyltransferase EHMT1 isoform X8 | 79813 | EHMT1 | 1265 | nan | nan	XP_016870625	34.58	5	4	4	Carbamidomethylation	988.33	1268.8	1827.6	0	0	0	988.33	1018.6	1500.4	0	0	0	1.00:1.03:1.52:0:0:0	1577.7	0	1289	0	#DIV/0!	1.00:0	137908
924	5765	| histone-lysine N-methyltransferase EHMT1 isoform 4 | 79813 | EHMT1 | 1291 | nan | nan	NP_001341192	34.58	5	4	4	Carbamidomethylation	988.33	1268.8	1827.6	0	0	0	988.33	1018.6	1500.4	0	0	0	1.00:1.03:1.52:0:0:0	1577.7	0	1289	0	#DIV/0!	1.00:0	140722
924	5766	| histone-lysine N-methyltransferase EHMT1 isoform X5 | 79813 | EHMT1 | 1293 | nan | nan	XP_016870623	34.58	5	4	4	Carbamidomethylation	988.33	1268.8	1827.6	0	0	0	988.33	1018.6	1500.4	0	0	0	1.00:1.03:1.52:0:0:0	1577.7	0	1289	0	#DIV/0!	1.00:0	141080
924	5767	| histone-lysine N-methyltransferase EHMT1 isoform X4 | 79813 | EHMT1 | 1294 | nan | nan	XP_011517325	34.58	5	4	4	Carbamidomethylation	988.33	1268.8	1827.6	0	0	0	988.33	1018.6	1500.4	0	0	0	1.00:1.03:1.52:0:0:0	1577.7	0	1289	0	#DIV/0!	1.00:0	141363
924	5768	| histone-lysine N-methyltransferase EHMT1 isoform X3 | 79813 | EHMT1 | 1295 | nan | nan	XP_005266162	34.58	5	4	4	Carbamidomethylation	988.33	1268.8	1827.6	0	0	0	988.33	1018.6	1500.4	0	0	0	1.00:1.03:1.52:0:0:0	1577.7	0	1289	0	#DIV/0!	1.00:0	141309
924	5769	| histone-lysine N-methyltransferase EHMT1 isoform 1 | 79813 | EHMT1 | 1298 | Q9H9B1 | sp	NP_079033	34.58	5	4	4	Carbamidomethylation	988.33	1268.8	1827.6	0	0	0	988.33	1018.6	1500.4	0	0	0	1.00:1.03:1.52:0:0:0	1577.7	0	1289	0	#DIV/0!	1.00:0	141466
924	5770	| histone-lysine N-methyltransferase EHMT1 isoform X2 | 79813 | EHMT1 | 1300 | nan | nan	XP_011517324	34.58	5	4	4	Carbamidomethylation	988.33	1268.8	1827.6	0	0	0	988.33	1018.6	1500.4	0	0	0	1.00:1.03:1.52:0:0:0	1577.7	0	1289	0	#DIV/0!	1.00:0	141824
924	5771	| histone-lysine N-methyltransferase EHMT1 isoform X1 | 79813 | EHMT1 | 1301 | nan | nan	XP_011517323	34.58	5	4	4	Carbamidomethylation	988.33	1268.8	1827.6	0	0	0	988.33	1018.6	1500.4	0	0	0	1.00:1.03:1.52:0:0:0	1577.7	0	1289	0	#DIV/0!	1.00:0	142107
1165	6956	| copine-1 isoform c | 8904 | CPNE1 | 536 | nan | nan	NP_001185792	34.55	8	4	4		3412.9	3520.9	2560.4	0	0	0	2948.4	3161.9	2148.2	0	0	0	1.00:1.07:0.73:0:0:0	3452.3	0	3040.4	0	#DIV/0!	1.00:0	58931
1165	6957	| copine-1 isoform a | 8904 | CPNE1 | 537 | Q99829 | sp	NP_690904	34.55	8	4	4		3412.9	3520.9	2560.4	0	0	0	2948.4	3161.9	2148.2	0	0	0	1.00:1.07:0.73:0:0:0	3452.3	0	3040.4	0	#DIV/0!	1.00:0	59059
1165	6958	| copine-1 isoform a | 8904 | CPNE1 | 537 | Q99829 | sp	NP_690905	34.55	8	4	4		3412.9	3520.9	2560.4	0	0	0	2948.4	3161.9	2148.2	0	0	0	1.00:1.07:0.73:0:0:0	3452.3	0	3040.4	0	#DIV/0!	1.00:0	59059
1165	6959	| copine-1 isoform a | 8904 | CPNE1 | 537 | Q99829 | sp	NP_690903	34.55	8	4	4		3412.9	3520.9	2560.4	0	0	0	2948.4	3161.9	2148.2	0	0	0	1.00:1.07:0.73:0:0:0	3452.3	0	3040.4	0	#DIV/0!	1.00:0	59059
1165	6960	| copine-1 isoform a | 8904 | CPNE1 | 537 | Q99829 | sp	NP_690902	34.55	8	4	4		3412.9	3520.9	2560.4	0	0	0	2948.4	3161.9	2148.2	0	0	0	1.00:1.07:0.73:0:0:0	3452.3	0	3040.4	0	#DIV/0!	1.00:0	59059
1165	6962	| copine-1 isoform b | 8904 | CPNE1 | 542 | Q99829 | sp	NP_003906	34.55	8	4	4		3412.9	3520.9	2560.4	0	0	0	2948.4	3161.9	2148.2	0	0	0	1.00:1.07:0.73:0:0:0	3452.3	0	3040.4	0	#DIV/0!	1.00:0	59718
1324	8951	| coiled-coil domain-containing protein 6 | 8030 | CCDC6 | 474 | Q16204 | sp	NP_005427	34.54	12	4	4		1190.8	876.25	1357.4	0	0	0	938.22	876.25	1357.4	0	0	0	1.00:0.93:1.45:0:0:0	1581.3	0	1328.7	0	#DIV/0!	1.00:0	53291
1130	12279	| cytochrome b-c1 complex subunit Rieske mitochondrial | 7386 | UQCRFS1 | 274 | P47985 | sp	NP_005994	34.54	19	4	4		2351.2	2289.1	3337.2	0	0	0	2015.7	1893.5	2807.6	0	0	0	1.00:0.94:1.39:0:0:0	2659.2	0	2238.9	0	#DIV/0!	1.00:0	29668
1860	20699	| dehydrodolichyl diphosphate synthase complex subunit NUS1 | 116150 | NUS1 | 293 | Q96E22 | sp	NP_612468	34.54	9	2	2	Carbamidomethylation	434	563.22	727.88	0	0	0	434	563.22	727.88	0	0	0	1.00:1.30:1.68:0:0:0	661.23	0	661.23	0	#DIV/0!	1.00:0	33224
1009	9774	| cytochrome b5 type B | 80777 | CYB5B | 150 | O43169 | sp	NP_085056	34.45	49	4	4		9473.3	5431.3	7667	0	0	0	7100.4	5431.3	7667	0	0	0	1.00:0.76:1.08:0:0:0	9199.1	0	6826.2	0	#DIV/0!	1.00:0	16695
470	2927	| adenosylhomocysteinase isoform 1 | 191 | AHCY | 432 | P23526 | sp	NP_000678	34.44	36	12	12	Carbamidomethylation	17002	15718	17382	5391.9	5935.7	8311.8	8663.8	7896.8	8087.6	3344.4	3461.1	3897.7	1.00:0.91:0.93:0.39:0.40:0.45	16877	7343.6	8216.1	3567.7	2.30291	1.00:0.43	47716
470	2928	| adenosylhomocysteinase isoform X2 | 191 | AHCY | 432 | P23526 | sp	XP_016883198	34.44	36	12	12	Carbamidomethylation	17002	15718	17382	5391.9	5935.7	8311.8	8663.8	7896.8	8087.6	3344.4	3461.1	3897.7	1.00:0.91:0.93:0.39:0.40:0.45	16877	7343.6	8216.1	3567.7	2.30291	1.00:0.43	47716
470	2929	| adenosylhomocysteinase isoform X2 | 191 | AHCY | 432 | P23526 | sp	XP_016883197	34.44	36	12	12	Carbamidomethylation	17002	15718	17382	5391.9	5935.7	8311.8	8663.8	7896.8	8087.6	3344.4	3461.1	3897.7	1.00:0.91:0.93:0.39:0.40:0.45	16877	7343.6	8216.1	3567.7	2.30291	1.00:0.43	47716
330	2277	| protein-glutamine gamma-glutamyltransferase 2 isoform c | 7052 | TGM2 | 606 | B4DIT7 | tr	NP_001310246	34.44	26	11	11	Carbamidomethylation	6874.5	7200.1	8629.2	679.6	1335.2	1296.2	3113.2	2614	3081.3	679.6	895.58	733.52	1.00:0.84:0.99:0.22:0.29:0.24	7826.2	1828.1	2936.2	1181.2	2.48578	1.00:0.40	68649
330	2278	| protein-glutamine gamma-glutamyltransferase 2 isoform X1 | 7052 | TGM2 | 687 | P21980 | sp	XP_011527330	34.44	23	11	11	Carbamidomethylation	6874.5	7200.1	8629.2	679.6	1335.2	1296.2	3113.2	2614	3081.3	679.6	895.58	733.52	1.00:0.84:0.99:0.22:0.29:0.24	7826.2	1828.1	2936.2	1181.2	2.48578	1.00:0.40	77329
330	2279	| protein-glutamine gamma-glutamyltransferase 2 isoform a | 7052 | TGM2 | 687 | P21980 | sp	NP_001310245	34.44	23	11	11	Carbamidomethylation	6874.5	7200.1	8629.2	679.6	1335.2	1296.2	3113.2	2614	3081.3	679.6	895.58	733.52	1.00:0.84:0.99:0.22:0.29:0.24	7826.2	1828.1	2936.2	1181.2	2.48578	1.00:0.40	77329
330	2280	| protein-glutamine gamma-glutamyltransferase 2 isoform a | 7052 | TGM2 | 687 | P21980 | sp	NP_004604	34.44	23	11	11	Carbamidomethylation	6874.5	7200.1	8629.2	679.6	1335.2	1296.2	3113.2	2614	3081.3	679.6	895.58	733.52	1.00:0.84:0.99:0.22:0.29:0.24	7826.2	1828.1	2936.2	1181.2	2.48578	1.00:0.40	77329
330	2281	| protein-glutamine gamma-glutamyltransferase 2 isoform d | 7052 | TGM2 | 627 | B4DTN7 | tr	NP_001310247	34.44	25	11	11	Carbamidomethylation	6874.5	7200.1	8629.2	679.6	1335.2	1296.2	3113.2	2614	3081.3	679.6	895.58	733.52	1.00:0.84:0.99:0.22:0.29:0.24	7826.2	1828.1	2936.2	1181.2	2.48578	1.00:0.40	70344
1169	10352	| ribose-phosphate pyrophosphokinase 2 isoform 2 | 5634 | PRPS2 | 318 | P11908 | sp	NP_002756	34.37	5	1	1		407.92	235.01	341.72	0	0	0	407.92	235.01	341.72	0	0	0	1.00:0.58:0.84:0:0:0	328.22	0	328.22	0	#DIV/0!	1.00:0	34769
1169	10353	| ribose-phosphate pyrophosphokinase 2 isoform 1 | 5634 | PRPS2 | 321 | P11908 | sp	NP_001034180	34.37	5	1	1		407.92	235.01	341.72	0	0	0	407.92	235.01	341.72	0	0	0	1.00:0.58:0.84:0:0:0	328.22	0	328.22	0	#DIV/0!	1.00:0	35054
306	954	| TBC1 domain family member 4 isoform 3 | 9882 | TBC1D4 | 1235 | O60343 | sp	NP_001273588	34.37	1	1	1		677.2	802.81	1086.6	0	0	0	677.2	802.81	1086.6	0	0	0	1.00:1.19:1.60:0:0:0	855.55	0	855.55	0	#DIV/0!	1.00:0	139556
306	969	| TBC1 domain family member 4 isoform 2 | 9882 | TBC1D4 | 1290 | O60343 | sp	NP_001273587	34.37	1	1	1		677.2	802.81	1086.6	0	0	0	677.2	802.81	1086.6	0	0	0	1.00:1.19:1.60:0:0:0	855.55	0	855.55	0	#DIV/0!	1.00:0	145688
306	986	| TBC1 domain family member 4 isoform X1 | 9882 | TBC1D4 | 1273 | nan | nan	XP_005266660	34.37	1	1	1		677.2	802.81	1086.6	0	0	0	677.2	802.81	1086.6	0	0	0	1.00:1.19:1.60:0:0:0	855.55	0	855.55	0	#DIV/0!	1.00:0	143856
306	1013	| TBC1 domain family member 4 isoform 1 | 9882 | TBC1D4 | 1298 | O60343 | sp	NP_055647	34.37	1	1	1		677.2	802.81	1086.6	0	0	0	677.2	802.81	1086.6	0	0	0	1.00:1.19:1.60:0:0:0	855.55	0	855.55	0	#DIV/0!	1.00:0	146563
2013	19336	| anaphase-promoting complex subunit 2 | 29882 | ANAPC2 | 822 | Q9UJX6 | sp	NP_037498	34.37	2	1	1		370.12	413.91	612.24	0	0	0	370.12	413.91	612.24	0	0	0	1.00:1.12:1.65:0:0:0	465.42	0	465.42	0	#DIV/0!	1.00:0	93828
1141	7036	| AT-rich interactive domain-containing protein 2 isoform 2 | 196528 | ARID2 | 1788 | Q68CP9 | sp	NP_001334768	34.35	3	3	3	Carbamidomethylation	798.21	0	1095.9	0	0	0	798.21	0	1095.9	0	0	0	1.00:0:1.37:0:0:0	1102	0	1102	0	#DIV/0!	1.00:0	192023
1141	7037	| AT-rich interactive domain-containing protein 2 isoform X1 | 196528 | ARID2 | 1793 | nan | nan	XP_006719335	34.35	3	3	3	Carbamidomethylation	798.21	0	1095.9	0	0	0	798.21	0	1095.9	0	0	0	1.00:0:1.37:0:0:0	1102	0	1102	0	#DIV/0!	1.00:0	192626
1141	7038	| AT-rich interactive domain-containing protein 2 isoform 1 | 196528 | ARID2 | 1835 | Q68CP9 | sp	NP_689854	34.35	3	3	3	Carbamidomethylation	798.21	0	1095.9	0	0	0	798.21	0	1095.9	0	0	0	1.00:0:1.37:0:0:0	1102	0	1102	0	#DIV/0!	1.00:0	197390
2	161	| myosin-9 | 4627 | MYH9 | 1960 | P35579 | sp	NP_002464	34.35	40	67	67	Carbamidomethylation; Acetylation (Protein N-term); Oxidation (M)	113460	108780	124160	22354	27825	37084	17375	15247	15903	4370.8	5201.5	5399.6	1.00:0.88:0.92:0.25:0.30:0.31	118760	32701	16294	4990.6	3.26494	1.00:0.31	226530
2	162	| myosin-9 isoform X1 | 4627 | MYH9 | 1960 | P35579 | sp	XP_016884294	34.35	40	67	67	Carbamidomethylation; Acetylation (Protein N-term); Oxidation (M)	113460	108780	124160	22354	27825	37084	17375	15247	15903	4370.8	5201.5	5399.6	1.00:0.88:0.92:0.25:0.30:0.31	118760	32701	16294	4990.6	3.26494	1.00:0.31	226530
2	163	| myosin-9 isoform X1 | 4627 | MYH9 | 1960 | P35579 | sp	XP_016884292	34.35	40	67	67	Carbamidomethylation; Acetylation (Protein N-term); Oxidation (M)	113460	108780	124160	22354	27825	37084	17375	15247	15903	4370.8	5201.5	5399.6	1.00:0.88:0.92:0.25:0.30:0.31	118760	32701	16294	4990.6	3.26494	1.00:0.31	226530
2	164	| myosin-9 isoform X1 | 4627 | MYH9 | 1960 | P35579 | sp	XP_016884295	34.35	40	67	67	Carbamidomethylation; Acetylation (Protein N-term); Oxidation (M)	113460	108780	124160	22354	27825	37084	17375	15247	15903	4370.8	5201.5	5399.6	1.00:0.88:0.92:0.25:0.30:0.31	118760	32701	16294	4990.6	3.26494	1.00:0.31	226530
2	165	| myosin-9 isoform X1 | 4627 | MYH9 | 1960 | P35579 | sp	XP_016884293	34.35	40	67	67	Carbamidomethylation; Acetylation (Protein N-term); Oxidation (M)	113460	108780	124160	22354	27825	37084	17375	15247	15903	4370.8	5201.5	5399.6	1.00:0.88:0.92:0.25:0.30:0.31	118760	32701	16294	4990.6	3.26494	1.00:0.31	226530
2	166	| myosin-9 isoform X1 | 4627 | MYH9 | 1960 | P35579 | sp	XP_011528499	34.35	40	67	67	Carbamidomethylation; Acetylation (Protein N-term); Oxidation (M)	113460	108780	124160	22354	27825	37084	17375	15247	15903	4370.8	5201.5	5399.6	1.00:0.88:0.92:0.25:0.30:0.31	118760	32701	16294	4990.6	3.26494	1.00:0.31	226530
1775	20651	| elongin-B isoform a | 6923 | ELOB | 118 | Q15370 | sp	NP_009039	34.33	21	1	1	Carbamidomethylation	997.47	1559.9	1297.4	0	0	0	997.47	1559.9	1297.4	0	0	0	1.00:1.56:1.30:0:0:0	1284.9	0	1284.9	0	#DIV/0!	1.00:0	13133
1775	20656	| elongin-B isoform b | 6923 | ELOB | 161 | Q15370 | sp	NP_996896	34.33	16	1	1	Carbamidomethylation	997.47	1559.9	1297.4	0	0	0	997.47	1559.9	1297.4	0	0	0	1.00:1.56:1.30:0:0:0	1284.9	0	1284.9	0	#DIV/0!	1.00:0	17911
286	1608	| far upstream element-binding protein 3 | 8939 | FUBP3 | 572 | Q96I24 | sp	NP_003925	34.32	42	14	14	Carbamidomethylation; Acetylation (Protein N-term)	13091	11946	16524	0	0	796.92	5403	4753.9	6817.7	0	0	0	1.00:0.88:1.26:0:0:0	14716	796.92	5658.2	0	#DIV/0!	1.00:0	61640
286	1693	| far upstream element-binding protein 3 isoform X1 | 8939 | FUBP3 | 548 | nan | nan	XP_005272289	34.32	44	14	14	Carbamidomethylation; Acetylation (Protein N-term)	13091	11946	16524	0	0	796.92	5403	4753.9	6817.7	0	0	0	1.00:0.88:1.26:0:0:0	14716	796.92	5658.2	0	#DIV/0!	1.00:0	58752
1131	5758	| mitofusin-1 | 55669 | MFN1 | 741 | Q8IWA4 | sp	NP_284941	34.28	5	3	3		335.58	654.33	1401.8	0	0	0	335.58	654.33	1401.8	0	0	0	1.00:1.95:4.18:0:0:0	1219.1	0	1219.1	0	#DIV/0!	1.00:0	84160
1131	5759	| mitofusin-1 isoform X1 | 55669 | MFN1 | 741 | Q8IWA4 | sp	XP_005247653	34.28	5	3	3		335.58	654.33	1401.8	0	0	0	335.58	654.33	1401.8	0	0	0	1.00:1.95:4.18:0:0:0	1219.1	0	1219.1	0	#DIV/0!	1.00:0	84160
1244	8410	| ADP-ribosylation factor 4 | 378 | ARF4 | 180 | P18085 | sp	NP_001651	34.27	10	2	2		668.03	180.33	309.36	0	0	0	668.03	180.33	309.36	0	0	0	1.00:0.27:0.46:0:0:0	617.17	0	617.17	0	#DIV/0!	1.00:0	20511
367	2432	| 5'-nucleotidase domain-containing protein 1 | 221294 | NT5DC1 | 455 | Q5TFE4 | sp	NP_689942	34.25	30	9	9	Carbamidomethylation	7735.2	6973.2	8440.5	0	433.54	421.13	4399.1	3727	4512.7	0	433.54	421.13	1.00:0.85:1.03:0:0.10:0.10	8160.9	427.33	4213	427.33	9.85889	1.00:0.10	51845
1035	5852	| elongator complex protein 1 isoform 2 | 8518 | ELP1 | 1218 | O95163 | sp	NP_001305289	34.23	7	5	5		1480.8	1436.9	1548.8	0	0	0	764.48	1215.1	970.09	0	0	0	1.00:1.59:1.27:0:0:0	1780.6	0	1141.6	0	#DIV/0!	1.00:0	138124
1035	5853	| elongator complex protein 1 isoform 1 | 8518 | ELP1 | 1332 | O95163 | sp	NP_003631	34.23	6	5	5		1480.8	1436.9	1548.8	0	0	0	764.48	1215.1	970.09	0	0	0	1.00:1.59:1.27:0:0:0	1780.6	0	1141.6	0	#DIV/0!	1.00:0	150254
179	613	| structural maintenance of chromosomes protein 2 isoform X1 | 10592 | SMC2 | 1197 | O95347 | sp	XP_016869696	34.23	24	23	23	Carbamidomethylation	14015	13255	15717	1098.8	888.31	1418.6	3383.6	2919.2	3391.6	441.38	485.01	605.39	1.00:0.86:1.00:0.13:0.14:0.18	15442	1918.1	3422.9	510.6	6.70368	1.00:0.15	135656
179	614	| structural maintenance of chromosomes protein 2 | 10592 | SMC2 | 1197 | O95347 | sp	NP_006435	34.23	24	23	23	Carbamidomethylation	14015	13255	15717	1098.8	888.31	1418.6	3383.6	2919.2	3391.6	441.38	485.01	605.39	1.00:0.86:1.00:0.13:0.14:0.18	15442	1918.1	3422.9	510.6	6.70368	1.00:0.15	135656
179	615	| structural maintenance of chromosomes protein 2 | 10592 | SMC2 | 1197 | O95347 | sp	NP_001036016	34.23	24	23	23	Carbamidomethylation	14015	13255	15717	1098.8	888.31	1418.6	3383.6	2919.2	3391.6	441.38	485.01	605.39	1.00:0.86:1.00:0.13:0.14:0.18	15442	1918.1	3422.9	510.6	6.70368	1.00:0.15	135656
179	616	| structural maintenance of chromosomes protein 2 isoform X1 | 10592 | SMC2 | 1197 | O95347 | sp	XP_016869697	34.23	24	23	23	Carbamidomethylation	14015	13255	15717	1098.8	888.31	1418.6	3383.6	2919.2	3391.6	441.38	485.01	605.39	1.00:0.86:1.00:0.13:0.14:0.18	15442	1918.1	3422.9	510.6	6.70368	1.00:0.15	135656
179	617	| structural maintenance of chromosomes protein 2 isoform X1 | 10592 | SMC2 | 1197 | O95347 | sp	XP_011516450	34.23	24	23	23	Carbamidomethylation	14015	13255	15717	1098.8	888.31	1418.6	3383.6	2919.2	3391.6	441.38	485.01	605.39	1.00:0.86:1.00:0.13:0.14:0.18	15442	1918.1	3422.9	510.6	6.70368	1.00:0.15	135656
179	618	| structural maintenance of chromosomes protein 2 | 10592 | SMC2 | 1197 | O95347 | sp	NP_001252531	34.23	24	23	23	Carbamidomethylation	14015	13255	15717	1098.8	888.31	1418.6	3383.6	2919.2	3391.6	441.38	485.01	605.39	1.00:0.86:1.00:0.13:0.14:0.18	15442	1918.1	3422.9	510.6	6.70368	1.00:0.15	135656
179	619	| structural maintenance of chromosomes protein 2 isoform X1 | 10592 | SMC2 | 1197 | O95347 | sp	XP_016869695	34.23	24	23	23	Carbamidomethylation	14015	13255	15717	1098.8	888.31	1418.6	3383.6	2919.2	3391.6	441.38	485.01	605.39	1.00:0.86:1.00:0.13:0.14:0.18	15442	1918.1	3422.9	510.6	6.70368	1.00:0.15	135656
179	620	| structural maintenance of chromosomes protein 2 isoform X1 | 10592 | SMC2 | 1197 | O95347 | sp	XP_011516451	34.23	24	23	23	Carbamidomethylation	14015	13255	15717	1098.8	888.31	1418.6	3383.6	2919.2	3391.6	441.38	485.01	605.39	1.00:0.86:1.00:0.13:0.14:0.18	15442	1918.1	3422.9	510.6	6.70368	1.00:0.15	135656
179	621	| structural maintenance of chromosomes protein 2 isoform X1 | 10592 | SMC2 | 1197 | O95347 | sp	XP_006716996	34.23	24	23	23	Carbamidomethylation	14015	13255	15717	1098.8	888.31	1418.6	3383.6	2919.2	3391.6	441.38	485.01	605.39	1.00:0.86:1.00:0.13:0.14:0.18	15442	1918.1	3422.9	510.6	6.70368	1.00:0.15	135656
179	622	| structural maintenance of chromosomes protein 2 | 10592 | SMC2 | 1197 | O95347 | sp	NP_001036015	34.23	24	23	23	Carbamidomethylation	14015	13255	15717	1098.8	888.31	1418.6	3383.6	2919.2	3391.6	441.38	485.01	605.39	1.00:0.86:1.00:0.13:0.14:0.18	15442	1918.1	3422.9	510.6	6.70368	1.00:0.15	135656
529	1982	| serine/threonine-protein phosphatase 2A 65 kDa regulatory subunit A | 5518 | PPP2R1A | 589 | P30153 | sp	NP_055040	34.19	24	10	10	Carbamidomethylation	4418.8	4821.9	5786.2	332.13	329.8	459.98	1889.8	2151.2	2454.5	332.13	329.8	459.98	1.00:1.14:1.30:0.18:0.17:0.24	5157	373.97	2165.2	373.97	5.78977	1.00:0.17	65309
1474	12310	| surfeit locus protein 4 isoform 3 | 6836 | SURF4 | 159 | O15260 | sp	NP_001267718	34.16	26	3	3	Carbamidomethylation	843.79	0	1355.7	0	0	0	843.79	0	1355.7	0	0	0	1.00:0:1.61:0:0:0	1644.5	0	1644.5	0	#DIV/0!	1.00:0	17970
1474	12314	| surfeit locus protein 4 isoform 1 | 6836 | SURF4 | 269 | O15260 | sp	NP_149351	34.16	15	3	3	Carbamidomethylation	843.79	0	1355.7	0	0	0	843.79	0	1355.7	0	0	0	1.00:0:1.61:0:0:0	1644.5	0	1644.5	0	#DIV/0!	1.00:0	30394
135	284	| ATPase family AAA domain-containing protein 3B isoform AAA-TOB3l | 83858 | ATAD3B | 648 | Q5T9A4 | sp	NP_114127	34.12	16	6	6	Carbamidomethylation	4706.3	4241.1	6528.6	0	0	0	3982.3	3758.5	5312.6	0	0	0	1.00:0.94:1.33:0:0:0	6036.5	0	4883	0	#DIV/0!	1.00:0	72573
195	1451	| MICOS complex subunit MIC60 isoform 3 | 10989 | IMMT | 747 | Q16891 | sp	NP_001093640	34.1	3	1	1		0	739.9	1178.6	0	0	0	0	739.9	1178.6	0	0	0	-:64.00:64.00:-:-:-	1083.1	0	1083.1	0	#DIV/0!	1.00:0	82625
631	4907	| serine-threonine kinase receptor-associated protein | 11171 | STRAP | 350 | Q9Y3F4 | sp	NP_009109	34.1	37	9	9		10046	8559.1	9067.8	251.61	0	247.59	5744.6	4658.2	4821.2	251.61	0	247.59	1.00:0.81:0.84:0.04:0:0.04	9895.6	249.6	5074.7	249.6	20.3313	1.00:0.05	38438
1183	9564	| methyl-CpG-binding domain protein 1 isoform 19 | 4152 | MBD1 | 524 | nan | nan	NP_001310881	34.09	10	3	3	Carbamidomethylation; Acetylation (Protein N-term)	483.35	496.7	1730.5	0	0	0	483.35	496.7	1730.5	0	0	0	1.00:1.03:3.58:0:0:0	1627.1	0	1627.1	0	#DIV/0!	1.00:0	57499
1183	9751	| methyl-CpG-binding domain protein 1 isoform X12 | 4152 | MBD1 | 616 | nan | nan	XP_016881245	34.09	9	3	3	Carbamidomethylation; Acetylation (Protein N-term)	483.35	496.7	1730.5	0	0	0	483.35	496.7	1730.5	0	0	0	1.00:1.03:3.58:0:0:0	1627.1	0	1627.1	0	#DIV/0!	1.00:0	68367
1183	9875	| methyl-CpG-binding domain protein 1 isoform 21 | 4152 | MBD1 | 576 | nan | nan	NP_001310883	34.09	9	3	3	Carbamidomethylation; Acetylation (Protein N-term)	483.35	496.7	1730.5	0	0	0	483.35	496.7	1730.5	0	0	0	1.00:1.03:3.58:0:0:0	1627.1	0	1627.1	0	#DIV/0!	1.00:0	62906
1183	9884	| methyl-CpG-binding domain protein 1 isoform X21 | 4152 | MBD1 | 581 | nan | nan	XP_016881254	34.09	9	3	3	Carbamidomethylation; Acetylation (Protein N-term)	483.35	496.7	1730.5	0	0	0	483.35	496.7	1730.5	0	0	0	1.00:1.03:3.58:0:0:0	1627.1	0	1627.1	0	#DIV/0!	1.00:0	63586
1183	9885	| methyl-CpG-binding domain protein 1 isoform X15 | 4152 | MBD1 | 606 | nan | nan	XP_024306946	34.09	9	3	3	Carbamidomethylation; Acetylation (Protein N-term)	483.35	496.7	1730.5	0	0	0	483.35	496.7	1730.5	0	0	0	1.00:1.03:3.58:0:0:0	1627.1	0	1627.1	0	#DIV/0!	1.00:0	66596
1183	10091	| methyl-CpG-binding domain protein 1 isoform X24 | 4152 | MBD1 | 559 | nan | nan	XP_011524309	34.09	10	3	3	Carbamidomethylation; Acetylation (Protein N-term)	483.35	496.7	1730.5	0	0	0	483.35	496.7	1730.5	0	0	0	1.00:1.03:3.58:0:0:0	1627.1	0	1627.1	0	#DIV/0!	1.00:0	61773
1183	10092	| methyl-CpG-binding domain protein 1 isoform X24 | 4152 | MBD1 | 559 | nan | nan	XP_016881258	34.09	10	3	3	Carbamidomethylation; Acetylation (Protein N-term)	483.35	496.7	1730.5	0	0	0	483.35	496.7	1730.5	0	0	0	1.00:1.03:3.58:0:0:0	1627.1	0	1627.1	0	#DIV/0!	1.00:0	61773
1183	10093	| methyl-CpG-binding domain protein 1 isoform X33 | 4152 | MBD1 | 571 | nan | nan	XP_016881266	34.09	9	3	3	Carbamidomethylation; Acetylation (Protein N-term)	483.35	496.7	1730.5	0	0	0	483.35	496.7	1730.5	0	0	0	1.00:1.03:3.58:0:0:0	1627.1	0	1627.1	0	#DIV/0!	1.00:0	63275
1183	10094	| methyl-CpG-binding domain protein 1 isoform X20 | 4152 | MBD1 | 584 | nan | nan	XP_011524304	34.09	9	3	3	Carbamidomethylation; Acetylation (Protein N-term)	483.35	496.7	1730.5	0	0	0	483.35	496.7	1730.5	0	0	0	1.00:1.03:3.58:0:0:0	1627.1	0	1627.1	0	#DIV/0!	1.00:0	64782
1183	10095	| methyl-CpG-binding domain protein 1 isoform X20 | 4152 | MBD1 | 584 | nan | nan	XP_016881253	34.09	9	3	3	Carbamidomethylation; Acetylation (Protein N-term)	483.35	496.7	1730.5	0	0	0	483.35	496.7	1730.5	0	0	0	1.00:1.03:3.58:0:0:0	1627.1	0	1627.1	0	#DIV/0!	1.00:0	64782
1183	10096	| methyl-CpG-binding domain protein 1 isoform X20 | 4152 | MBD1 | 584 | nan | nan	XP_011524305	34.09	9	3	3	Carbamidomethylation; Acetylation (Protein N-term)	483.35	496.7	1730.5	0	0	0	483.35	496.7	1730.5	0	0	0	1.00:1.03:3.58:0:0:0	1627.1	0	1627.1	0	#DIV/0!	1.00:0	64782
1183	10097	| methyl-CpG-binding domain protein 1 isoform 17 | 4152 | MBD1 | 589 | nan | nan	NP_001310879	34.09	9	3	3	Carbamidomethylation; Acetylation (Protein N-term)	483.35	496.7	1730.5	0	0	0	483.35	496.7	1730.5	0	0	0	1.00:1.03:3.58:0:0:0	1627.1	0	1627.1	0	#DIV/0!	1.00:0	64909
1183	10098	| methyl-CpG-binding domain protein 1 isoform X18 | 4152 | MBD1 | 596 | nan | nan	XP_016881250	34.09	9	3	3	Carbamidomethylation; Acetylation (Protein N-term)	483.35	496.7	1730.5	0	0	0	483.35	496.7	1730.5	0	0	0	1.00:1.03:3.58:0:0:0	1627.1	0	1627.1	0	#DIV/0!	1.00:0	66284
1183	10099	| methyl-CpG-binding domain protein 1 isoform 18 | 4152 | MBD1 | 602 | nan | nan	NP_001310880	34.09	9	3	3	Carbamidomethylation; Acetylation (Protein N-term)	483.35	496.7	1730.5	0	0	0	483.35	496.7	1730.5	0	0	0	1.00:1.03:3.58:0:0:0	1627.1	0	1627.1	0	#DIV/0!	1.00:0	66539
1183	10100	| methyl-CpG-binding domain protein 1 isoform X14 | 4152 | MBD1 | 609 | nan | nan	XP_011524301	34.09	9	3	3	Carbamidomethylation; Acetylation (Protein N-term)	483.35	496.7	1730.5	0	0	0	483.35	496.7	1730.5	0	0	0	1.00:1.03:3.58:0:0:0	1627.1	0	1627.1	0	#DIV/0!	1.00:0	67292
1183	10101	| methyl-CpG-binding domain protein 1 isoform X13 | 4152 | MBD1 | 615 | nan | nan	XP_016881247	34.09	9	3	3	Carbamidomethylation; Acetylation (Protein N-term)	483.35	496.7	1730.5	0	0	0	483.35	496.7	1730.5	0	0	0	1.00:1.03:3.58:0:0:0	1627.1	0	1627.1	0	#DIV/0!	1.00:0	68047
1183	10102	| methyl-CpG-binding domain protein 1 isoform X13 | 4152 | MBD1 | 615 | nan | nan	XP_016881248	34.09	9	3	3	Carbamidomethylation; Acetylation (Protein N-term)	483.35	496.7	1730.5	0	0	0	483.35	496.7	1730.5	0	0	0	1.00:1.03:3.58:0:0:0	1627.1	0	1627.1	0	#DIV/0!	1.00:0	68047
1183	10103	| methyl-CpG-binding domain protein 1 isoform X13 | 4152 | MBD1 | 615 | nan | nan	XP_016881246	34.09	9	3	3	Carbamidomethylation; Acetylation (Protein N-term)	483.35	496.7	1730.5	0	0	0	483.35	496.7	1730.5	0	0	0	1.00:1.03:3.58:0:0:0	1627.1	0	1627.1	0	#DIV/0!	1.00:0	68047
1183	10104	| methyl-CpG-binding domain protein 1 isoform X11 | 4152 | MBD1 | 617 | nan | nan	XP_016881244	34.09	9	3	3	Carbamidomethylation; Acetylation (Protein N-term)	483.35	496.7	1730.5	0	0	0	483.35	496.7	1730.5	0	0	0	1.00:1.03:3.58:0:0:0	1627.1	0	1627.1	0	#DIV/0!	1.00:0	68109
1183	10383	| methyl-CpG-binding domain protein 1 isoform X30 | 4152 | MBD1 | 515 | nan | nan	XP_016881264	34.09	10	3	3	Carbamidomethylation; Acetylation (Protein N-term)	483.35	496.7	1730.5	0	0	0	483.35	496.7	1730.5	0	0	0	1.00:1.03:3.58:0:0:0	1627.1	0	1627.1	0	#DIV/0!	1.00:0	56669
1183	10384	| methyl-CpG-binding domain protein 1 isoform X28 | 4152 | MBD1 | 540 | nan | nan	XP_024306950	34.09	10	3	3	Carbamidomethylation; Acetylation (Protein N-term)	483.35	496.7	1730.5	0	0	0	483.35	496.7	1730.5	0	0	0	1.00:1.03:3.58:0:0:0	1627.1	0	1627.1	0	#DIV/0!	1.00:0	59678
1183	10385	| methyl-CpG-binding domain protein 1 isoform X27 | 4152 | MBD1 | 546 | nan | nan	XP_016881261	34.09	10	3	3	Carbamidomethylation; Acetylation (Protein N-term)	483.35	496.7	1730.5	0	0	0	483.35	496.7	1730.5	0	0	0	1.00:1.03:3.58:0:0:0	1627.1	0	1627.1	0	#DIV/0!	1.00:0	59933
1183	10386	| methyl-CpG-binding domain protein 1 isoform X25 | 4152 | MBD1 | 559 | nan | nan	XP_024306949	34.09	10	3	3	Carbamidomethylation; Acetylation (Protein N-term)	483.35	496.7	1730.5	0	0	0	483.35	496.7	1730.5	0	0	0	1.00:1.03:3.58:0:0:0	1627.1	0	1627.1	0	#DIV/0!	1.00:0	61441
1183	10387	| methyl-CpG-binding domain protein 1 isoform X25 | 4152 | MBD1 | 559 | nan | nan	XP_024306948	34.09	10	3	3	Carbamidomethylation; Acetylation (Protein N-term)	483.35	496.7	1730.5	0	0	0	483.35	496.7	1730.5	0	0	0	1.00:1.03:3.58:0:0:0	1627.1	0	1627.1	0	#DIV/0!	1.00:0	61441
1183	10388	| methyl-CpG-binding domain protein 1 isoform X23 | 4152 | MBD1 | 561 | nan | nan	XP_016881257	34.09	10	3	3	Carbamidomethylation; Acetylation (Protein N-term)	483.35	496.7	1730.5	0	0	0	483.35	496.7	1730.5	0	0	0	1.00:1.03:3.58:0:0:0	1627.1	0	1627.1	0	#DIV/0!	1.00:0	61503
1183	10389	| methyl-CpG-binding domain protein 1 isoform X22 | 4152 | MBD1 | 574 | nan | nan	XP_016881256	34.09	9	3	3	Carbamidomethylation; Acetylation (Protein N-term)	483.35	496.7	1730.5	0	0	0	483.35	496.7	1730.5	0	0	0	1.00:1.03:3.58:0:0:0	1627.1	0	1627.1	0	#DIV/0!	1.00:0	63011
1183	10390	| methyl-CpG-binding domain protein 1 isoform X22 | 4152 | MBD1 | 574 | nan | nan	XP_016881255	34.09	9	3	3	Carbamidomethylation; Acetylation (Protein N-term)	483.35	496.7	1730.5	0	0	0	483.35	496.7	1730.5	0	0	0	1.00:1.03:3.58:0:0:0	1627.1	0	1627.1	0	#DIV/0!	1.00:0	63011
1183	10391	| methyl-CpG-binding domain protein 1 isoform X19 | 4152 | MBD1 | 586 | nan | nan	XP_024306947	34.09	9	3	3	Carbamidomethylation; Acetylation (Protein N-term)	483.35	496.7	1730.5	0	0	0	483.35	496.7	1730.5	0	0	0	1.00:1.03:3.58:0:0:0	1627.1	0	1627.1	0	#DIV/0!	1.00:0	64513
1183	10392	| methyl-CpG-binding domain protein 1 isoform X17 | 4152 | MBD1 | 599 | nan | nan	XP_011524303	34.09	9	3	3	Carbamidomethylation; Acetylation (Protein N-term)	483.35	496.7	1730.5	0	0	0	483.35	496.7	1730.5	0	0	0	1.00:1.03:3.58:0:0:0	1627.1	0	1627.1	0	#DIV/0!	1.00:0	65520
1183	10393	| methyl-CpG-binding domain protein 1 isoform X10 | 4152 | MBD1 | 624 | nan | nan	XP_024306945	34.09	9	3	3	Carbamidomethylation; Acetylation (Protein N-term)	483.35	496.7	1730.5	0	0	0	483.35	496.7	1730.5	0	0	0	1.00:1.03:3.58:0:0:0	1627.1	0	1627.1	0	#DIV/0!	1.00:0	68530
1378	9541	| immunoglobulin-binding protein 1 | 3476 | IGBP1 | 339 | P78318 | sp	NP_001542	34.06	12	3	3		1812.8	1201.6	1629.9	0	0	0	1812.8	1201.6	1629.9	0	0	0	1.00:0.66:0.90:0:0:0	1548.1	0	1548.1	0	#DIV/0!	1.00:0	39222
1378	9542	| immunoglobulin-binding protein 1 isoform X1 | 3476 | IGBP1 | 339 | P78318 | sp	XP_016884978	34.06	12	3	3		1812.8	1201.6	1629.9	0	0	0	1812.8	1201.6	1629.9	0	0	0	1.00:0.66:0.90:0:0:0	1548.1	0	1548.1	0	#DIV/0!	1.00:0	39222
1411	11730	| transcriptional activator protein Pur-alpha | 5813 | PURA | 322 | Q00577 | sp	NP_005850	34.03	18	3	3		2642.5	1994.2	2923.8	0	0	0	2642.5	1994.2	2923.8	0	0	0	1.00:0.75:1.11:0:0:0	2664.9	0	2664.9	0	#DIV/0!	1.00:0	34911
1567	13178	| NFU1 iron-sulfur cluster scaffold homolog mitochondrial isoform 1 | 27247 | NFU1 | 230 | Q9UMS0 | sp	NP_056515	34.01	17	3	3		2143.9	1847.1	2750.9	0	0	0	2143.9	1847.1	2750.9	0	0	0	1.00:0.86:1.28:0:0:0	2247.3	0	2247.3	0	#DIV/0!	1.00:0	25924
1567	13179	| NFU1 iron-sulfur cluster scaffold homolog mitochondrial isoform X1 | 27247 | NFU1 | 230 | Q9UMS0 | sp	XP_016859297	34.01	17	3	3		2143.9	1847.1	2750.9	0	0	0	2143.9	1847.1	2750.9	0	0	0	1.00:0.86:1.28:0:0:0	2247.3	0	2247.3	0	#DIV/0!	1.00:0	25924
1567	13180	| NFU1 iron-sulfur cluster scaffold homolog mitochondrial isoform 2 | 27247 | NFU1 | 254 | Q9UMS0 | sp	NP_001002755	34.01	16	3	3		2143.9	1847.1	2750.9	0	0	0	2143.9	1847.1	2750.9	0	0	0	1.00:0.86:1.28:0:0:0	2247.3	0	2247.3	0	#DIV/0!	1.00:0	28463
1848	14391	| translation initiation factor eIF-2B subunit beta | 8892 | EIF2B2 | 351 | P49770 | sp	NP_055054	34	10	2	2		466.87	0	697.55	0	0	0	466.87	0	697.55	0	0	0	1.00:0:1.49:0:0:0	704.3	0	704.3	0	#DIV/0!	1.00:0	38990
347	1630	| spermatid perinuclear RNA-binding protein isoform X4 | 55342 | STRBP | 648 | nan | nan	XP_016870387	34	27	12	12	Carbamidomethylation	5629.4	5142.5	8483.8	0	0	0	2717.1	2417.9	3531.1	0	0	0	1.00:0.89:1.30:0:0:0	7183.7	0	2888.7	0	#DIV/0!	1.00:0	70762
347	1631	| spermatid perinuclear RNA-binding protein isoform X4 | 55342 | STRBP | 648 | nan | nan	XP_024303371	34	27	12	12	Carbamidomethylation	5629.4	5142.5	8483.8	0	0	0	2717.1	2417.9	3531.1	0	0	0	1.00:0.89:1.30:0:0:0	7183.7	0	2888.7	0	#DIV/0!	1.00:0	70762
347	1632	| spermatid perinuclear RNA-binding protein isoform X3 | 55342 | STRBP | 657 | A0A0S2Z5K8 | tr	XP_016870386	34	26	12	12	Carbamidomethylation	5629.4	5142.5	8483.8	0	0	0	2717.1	2417.9	3531.1	0	0	0	1.00:0.89:1.30:0:0:0	7183.7	0	2888.7	0	#DIV/0!	1.00:0	72132
347	1633	| spermatid perinuclear RNA-binding protein isoform 2 | 55342 | STRBP | 658 | Q96SI9 | sp	NP_001164608	34	26	12	12	Carbamidomethylation	5629.4	5142.5	8483.8	0	0	0	2717.1	2417.9	3531.1	0	0	0	1.00:0.89:1.30:0:0:0	7183.7	0	2888.7	0	#DIV/0!	1.00:0	71967
347	1635	| spermatid perinuclear RNA-binding protein isoform X2 | 55342 | STRBP | 672 | nan | nan	XP_024303370	34	26	12	12	Carbamidomethylation	5629.4	5142.5	8483.8	0	0	0	2717.1	2417.9	3531.1	0	0	0	1.00:0.89:1.30:0:0:0	7183.7	0	2888.7	0	#DIV/0!	1.00:0	73653
347	1636	| spermatid perinuclear RNA-binding protein isoform 1 | 55342 | STRBP | 672 | Q96SI9 | sp	NP_060857	34	26	12	12	Carbamidomethylation	5629.4	5142.5	8483.8	0	0	0	2717.1	2417.9	3531.1	0	0	0	1.00:0.89:1.30:0:0:0	7183.7	0	2888.7	0	#DIV/0!	1.00:0	73653
347	1637	| spermatid perinuclear RNA-binding protein isoform X2 | 55342 | STRBP | 672 | Q96SI9 | sp	XP_016870385	34	26	12	12	Carbamidomethylation	5629.4	5142.5	8483.8	0	0	0	2717.1	2417.9	3531.1	0	0	0	1.00:0.89:1.30:0:0:0	7183.7	0	2888.7	0	#DIV/0!	1.00:0	73653
347	1638	| spermatid perinuclear RNA-binding protein isoform X1 | 55342 | STRBP | 674 | nan | nan	XP_016870379	34	26	12	12	Carbamidomethylation	5629.4	5142.5	8483.8	0	0	0	2717.1	2417.9	3531.1	0	0	0	1.00:0.89:1.30:0:0:0	7183.7	0	2888.7	0	#DIV/0!	1.00:0	73711
347	1639	| spermatid perinuclear RNA-binding protein isoform X1 | 55342 | STRBP | 674 | nan | nan	XP_016870380	34	26	12	12	Carbamidomethylation	5629.4	5142.5	8483.8	0	0	0	2717.1	2417.9	3531.1	0	0	0	1.00:0.89:1.30:0:0:0	7183.7	0	2888.7	0	#DIV/0!	1.00:0	73711
347	1640	| spermatid perinuclear RNA-binding protein isoform X1 | 55342 | STRBP | 674 | nan | nan	XP_016870381	34	26	12	12	Carbamidomethylation	5629.4	5142.5	8483.8	0	0	0	2717.1	2417.9	3531.1	0	0	0	1.00:0.89:1.30:0:0:0	7183.7	0	2888.7	0	#DIV/0!	1.00:0	73711
1193	10808	| serine/arginine-rich splicing factor 10 isoform 3 | 10772 | SRSF10 | 261 | O75494 | sp	NP_001177934	33.97	19	4	4		4908.2	4148.5	5675.2	0	0	674.27	4273.5	3507.8	5054.9	0	0	0	1.00:0.82:1.18:0:0:0	4910.6	674.27	4278.7	0	#DIV/0!	1.00:0	31213
1193	10953	| serine/arginine-rich splicing factor 10 isoform 8 | 10772 | SRSF10 | 172 | Q5JRI1 | tr	NP_001287865	33.97	28	4	4		4908.2	4148.5	5675.2	0	0	674.27	4273.5	3507.8	5054.9	0	0	0	1.00:0.82:1.18:0:0:0	4910.6	674.27	4278.7	0	#DIV/0!	1.00:0	20913
1193	10956	| serine/arginine-rich splicing factor 10 isoform 5 | 10772 | SRSF10 | 182 | O75494 | sp	NP_001177936	33.97	27	4	4		4908.2	4148.5	5675.2	0	0	674.27	4273.5	3507.8	5054.9	0	0	0	1.00:0.82:1.18:0:0:0	4910.6	674.27	4278.7	0	#DIV/0!	1.00:0	22135
1193	11157	| serine/arginine-rich splicing factor 10 isoform 9 | 10772 | SRSF10 | 217 | nan | nan	NP_001287866	33.97	23	4	4		4908.2	4148.5	5675.2	0	0	674.27	4273.5	3507.8	5054.9	0	0	0	1.00:0.82:1.18:0:0:0	4910.6	674.27	4278.7	0	#DIV/0!	1.00:0	26300
1193	11159	| serine/arginine-rich splicing factor 10 isoform 2 | 10772 | SRSF10 | 262 | O75494 | sp	NP_473357	33.97	19	4	4		4908.2	4148.5	5675.2	0	0	674.27	4273.5	3507.8	5054.9	0	0	0	1.00:0.82:1.18:0:0:0	4910.6	674.27	4278.7	0	#DIV/0!	1.00:0	31301
1193	11431	| serine/arginine-rich splicing factor 10 isoform 6 | 10772 | SRSF10 | 165 | O75494 | sp	NP_001177938	33.97	30	4	4		4908.2	4148.5	5675.2	0	0	674.27	4273.5	3507.8	5054.9	0	0	0	1.00:0.82:1.18:0:0:0	4910.6	674.27	4278.7	0	#DIV/0!	1.00:0	20117
1193	11432	| serine/arginine-rich splicing factor 10 isoform 4 | 10772 | SRSF10 | 173 | O75494 | sp	NP_001177935	33.97	28	4	4		4908.2	4148.5	5675.2	0	0	674.27	4273.5	3507.8	5054.9	0	0	0	1.00:0.82:1.18:0:0:0	4910.6	674.27	4278.7	0	#DIV/0!	1.00:0	21000
1193	11433	| serine/arginine-rich splicing factor 10 isoform 1 | 10772 | SRSF10 | 183 | O75494 | sp	NP_006616	33.97	27	4	4		4908.2	4148.5	5675.2	0	0	674.27	4273.5	3507.8	5054.9	0	0	0	1.00:0.82:1.18:0:0:0	4910.6	674.27	4278.7	0	#DIV/0!	1.00:0	22222
1287	12169	| exosome complex component MTR3 | 118460 | EXOSC6 | 272 | Q5RKV6 | sp	NP_478126	33.95	11	2	2		696.24	501.54	801.14	0	0	0	696.24	501.54	801.14	0	0	0	1.00:0.72:1.15:0:0:0	666.31	0	666.31	0	#DIV/0!	1.00:0	28235
1265	8146	| kanadaptin | 22950 | SLC4A1AP | 796 | Q9BWU0 | sp	NP_060628	33.95	7	4	4	Carbamidomethylation	1731.9	1458.6	1505.7	0	0	0	1731.9	1139.6	1505.7	0	0	0	1.00:0.66:0.87:0:0:0	1907.3	0	1588.4	0	#DIV/0!	1.00:0	88814
90	507	| dynamin-like 120 kDa protein mitochondrial isoform 1 preproprotein | 4976 | OPA1 | 960 | O60313 | sp	NP_056375	33.95	33	24	24	Carbamidomethylation	20772	18476	25918	0	0	0	6065.9	5069.9	7171.6	0	0	0	1.00:0.84:1.18:0:0:0	22334	0	6102.5	0	#DIV/0!	1.00:0	111630
90	576	| dynamin-like 120 kDa protein mitochondrial isoform 7 | 4976 | OPA1 | 997 | O60313 | sp	NP_570849	33.95	31	24	24	Carbamidomethylation	20772	18476	25918	0	0	0	6065.9	5069.9	7171.6	0	0	0	1.00:0.84:1.18:0:0:0	22334	0	6102.5	0	#DIV/0!	1.00:0	115884
1021	12274	| MICOS complex subunit MIC19 isoform 2 | 54927 | CHCHD3 | 227 | Q9NX63 | sp	NP_060282	33.92	11	2	2		1617.3	1273	1587.4	413.95	489.13	523.21	1617.3	1273	1587.4	413.95	489.13	523.21	1.00:0.79:0.98:0.26:0.30:0.32	1492.5	475.43	1492.5	475.43	3.13926	1.00:0.32	26152
1021	12275	| MICOS complex subunit MIC19 isoform 1 | 54927 | CHCHD3 | 232 | Q9NX63 | sp	NP_001304106	33.92	11	2	2		1617.3	1273	1587.4	413.95	489.13	523.21	1617.3	1273	1587.4	413.95	489.13	523.21	1.00:0.79:0.98:0.26:0.30:0.32	1492.5	475.43	1492.5	475.43	3.13926	1.00:0.32	26753
295	2643	| eukaryotic translation initiation factor 2 subunit 3 | 1968 | EIF2S3 | 472 | P41091 | sp	NP_001406	33.92	40	13	13	Carbamidomethylation; Acetylation (Protein N-term)	15681	15462	16545	949.14	1398.3	1240.3	6768.1	6194.4	6923.6	949.14	1113.1	1240.3	1.00:0.92:1.02:0.14:0.16:0.18	15896	1386.1	6628.7	1100.8	6.02171	1.00:0.17	51110
902	5879	| F-box only protein 30 isoform X1 | 84085 | FBXO30 | 745 | Q8TB52 | sp	XP_011534479	33.91	14	7	7	Carbamidomethylation; Acetylation (Protein N-term)	2685	3286.3	3460.1	0	0	0	1499.9	1981.7	2231.9	0	0	0	1.00:1.32:1.49:0:0:0	3484.8	0	1904.5	0	#DIV/0!	1.00:0	82304
902	5880	| F-box only protein 30 | 84085 | FBXO30 | 745 | Q8TB52 | sp	NP_001335021	33.91	14	7	7	Carbamidomethylation; Acetylation (Protein N-term)	2685	3286.3	3460.1	0	0	0	1499.9	1981.7	2231.9	0	0	0	1.00:1.32:1.49:0:0:0	3484.8	0	1904.5	0	#DIV/0!	1.00:0	82304
902	5881	| F-box only protein 30 | 84085 | FBXO30 | 745 | Q8TB52 | sp	NP_115521	33.91	14	7	7	Carbamidomethylation; Acetylation (Protein N-term)	2685	3286.3	3460.1	0	0	0	1499.9	1981.7	2231.9	0	0	0	1.00:1.32:1.49:0:0:0	3484.8	0	1904.5	0	#DIV/0!	1.00:0	82304
902	5882	| F-box only protein 30 isoform X1 | 84085 | FBXO30 | 745 | Q8TB52 | sp	XP_016866842	33.91	14	7	7	Carbamidomethylation; Acetylation (Protein N-term)	2685	3286.3	3460.1	0	0	0	1499.9	1981.7	2231.9	0	0	0	1.00:1.32:1.49:0:0:0	3484.8	0	1904.5	0	#DIV/0!	1.00:0	82304
1139	6116	| mitochondrial ribonuclease P catalytic subunit isoform 3 | 9692 | KIAA0391 | 488 | O15091 | sp	NP_001243608	33.9	15	5	5	Carbamidomethylation	1772.8	1688.5	2710	0	0	0	1272.4	1392	1901.2	0	0	0	1.00:1.09:1.49:0:0:0	2158.9	0	1521.9	0	#DIV/0!	1.00:0	56487
1139	6196	| mitochondrial ribonuclease P catalytic subunit isoform X1 | 9692 | KIAA0391 | 583 | O15091 | sp	XP_011535712	33.9	13	5	5	Carbamidomethylation	1772.8	1688.5	2710	0	0	0	1272.4	1392	1901.2	0	0	0	1.00:1.09:1.49:0:0:0	2158.9	0	1521.9	0	#DIV/0!	1.00:0	67315
1139	6197	| mitochondrial ribonuclease P catalytic subunit isoform X1 | 9692 | KIAA0391 | 583 | O15091 | sp	XP_005268294	33.9	13	5	5	Carbamidomethylation	1772.8	1688.5	2710	0	0	0	1272.4	1392	1901.2	0	0	0	1.00:1.09:1.49:0:0:0	2158.9	0	1521.9	0	#DIV/0!	1.00:0	67315
1139	6198	| mitochondrial ribonuclease P catalytic subunit isoform 1 precursor | 9692 | KIAA0391 | 583 | O15091 | sp	NP_055487	33.9	13	5	5	Carbamidomethylation	1772.8	1688.5	2710	0	0	0	1272.4	1392	1901.2	0	0	0	1.00:1.09:1.49:0:0:0	2158.9	0	1521.9	0	#DIV/0!	1.00:0	67315
1139	6362	| mitochondrial ribonuclease P catalytic subunit isoform 2 | 9692 | KIAA0391 | 567 | O15091 | sp	NP_001243607	33.9	13	5	5	Carbamidomethylation	1772.8	1688.5	2710	0	0	0	1272.4	1392	1901.2	0	0	0	1.00:1.09:1.49:0:0:0	2158.9	0	1521.9	0	#DIV/0!	1.00:0	65486
1139	6363	| mitochondrial ribonuclease P catalytic subunit isoform X2 | 9692 | KIAA0391 | 567 | O15091 | sp	XP_016877325	33.9	13	5	5	Carbamidomethylation	1772.8	1688.5	2710	0	0	0	1272.4	1392	1901.2	0	0	0	1.00:1.09:1.49:0:0:0	2158.9	0	1521.9	0	#DIV/0!	1.00:0	65486
885	7142	| hydroxymethylglutaryl-CoA lyase mitochondrial isoform 1 precursor | 3155 | HMGCL | 325 | P35914 | sp	NP_000182	33.88	21	5	5	Carbamidomethylation	1627.8	1206.6	2137.3	0	0	0	1368.1	940.06	1371.1	0	0	0	1.00:0.69:1.00:0:0:0	1998.8	0	1352.6	0	#DIV/0!	1.00:0	34360
1572	7541	| 26S proteasome regulatory subunit 10B | 5706 | PSMC6 | 403 | P62333 | sp	NP_002797	33.87	13	4	4	Carbamidomethylation	815.07	662.37	1450.3	0	0	0	815.07	662.37	1048.6	0	0	0	1.00:0.81:1.29:0:0:0	1568.5	0	1166.7	0	#DIV/0!	1.00:0	45797
1321	6680	| dimethyladenosine transferase 2 mitochondrial | 64216 | TFB2M | 396 | Q9H5Q4 | sp	NP_071761	33.87	14	5	5	Carbamidomethylation	3057.8	2804.1	3921.6	0	0	0	2314.3	2071.8	3031.3	0	0	0	1.00:0.90:1.31:0:0:0	3261.2	0	2472.5	0	#DIV/0!	1.00:0	45349
1046	8552	| kinesin-like protein KIF2A isoform 4 | 3796 | KIF2A | 687 | B0AZS5 | tr	NP_001230882	33.83	7	3	3		1176.2	1483.8	1789.2	0	0	0	1176.2	1483.8	1789.2	0	0	0	1.00:1.26:1.52:0:0:0	1616.5	0	1616.5	0	#DIV/0!	1.00:0	78042
1046	8554	| kinesin-like protein KIF2A isoform 1 | 3796 | KIF2A | 706 | O00139 | sp	NP_004511	33.83	6	3	3		1176.2	1483.8	1789.2	0	0	0	1176.2	1483.8	1789.2	0	0	0	1.00:1.26:1.52:0:0:0	1616.5	0	1616.5	0	#DIV/0!	1.00:0	79955
1046	8557	| kinesin-like protein KIF2A isoform 2 | 3796 | KIF2A | 744 | O00139 | sp	NP_001091981	33.83	6	3	3		1176.2	1483.8	1789.2	0	0	0	1176.2	1483.8	1789.2	0	0	0	1.00:1.26:1.52:0:0:0	1616.5	0	1616.5	0	#DIV/0!	1.00:0	84089
1046	9267	| kinesin-like protein KIF2A isoform 3 | 3796 | KIF2A | 686 | O00139 | sp	NP_001230881	33.83	7	3	3		1176.2	1483.8	1789.2	0	0	0	1176.2	1483.8	1789.2	0	0	0	1.00:1.26:1.52:0:0:0	1616.5	0	1616.5	0	#DIV/0!	1.00:0	77749
1111	6528	| trimethyllysine dioxygenase mitochondrial isoform 1 precursor | 55217 | TMLHE | 421 | Q9NVH6 | sp	NP_060666	33.83	16	5	5	Carbamidomethylation	5608	1059.4	2826.7	0	0	0	5283.3	1059.4	1983.5	0	0	0	1.00:0.20:0.38:0:0:0	4309.7	0	3549.1	0	#DIV/0!	1.00:0	49518
397	746	| transportin-3 isoform 1 | 23534 | TNPO3 | 923 | Q9Y5L0 | sp	NP_036602	33.82	16	10	10	Carbamidomethylation	6071.1	5527	5922.7	0	0	0	4208.5	3359.4	2914.2	0	0	0	1.00:0.80:0.69:0:0:0	6799	0	3494	0	#DIV/0!	1.00:0	104203
172	2640	| 14-3-3 protein epsilon | 7531 | YWHAE | 255 | P62258 | sp	NP_006752	33.8	64	15	15	Acetylation (Protein N-term); Oxidation (M)	26746	26848	29069	6940.7	7229.5	9622.3	16915	16473	18806	5654.4	5953.6	6976.2	1.00:0.97:1.11:0.33:0.35:0.41	27844	8536.6	17398	6194.7	2.80853	1.00:0.36	29174
1995	13259	| G patch domain-containing protein 8 isoform X1 | 23131 | GPATCH8 | 1531 | nan | nan	XP_011522859	33.77	2	2	2		882.13	632.3	979.24	0	0	0	882.13	632.3	979.24	0	0	0	1.00:0.72:1.11:0:0:0	831.22	0	831.22	0	#DIV/0!	1.00:0	167375
1995	13672	| G patch domain-containing protein 8 isoform X2 | 23131 | GPATCH8 | 1453 | nan | nan	XP_024306430	33.77	2	2	2		882.13	632.3	979.24	0	0	0	882.13	632.3	979.24	0	0	0	1.00:0.72:1.11:0:0:0	831.22	0	831.22	0	#DIV/0!	1.00:0	158371
1995	13673	| G patch domain-containing protein 8 isoform X2 | 23131 | GPATCH8 | 1453 | nan | nan	XP_024306429	33.77	2	2	2		882.13	632.3	979.24	0	0	0	882.13	632.3	979.24	0	0	0	1.00:0.72:1.11:0:0:0	831.22	0	831.22	0	#DIV/0!	1.00:0	158371
1995	13674	| G patch domain-containing protein 8 isoform X2 | 23131 | GPATCH8 | 1453 | nan | nan	XP_011522860	33.77	2	2	2		882.13	632.3	979.24	0	0	0	882.13	632.3	979.24	0	0	0	1.00:0.72:1.11:0:0:0	831.22	0	831.22	0	#DIV/0!	1.00:0	158371
1995	13675	| G patch domain-containing protein 8 isoform X2 | 23131 | GPATCH8 | 1453 | nan | nan	XP_016879862	33.77	2	2	2		882.13	632.3	979.24	0	0	0	882.13	632.3	979.24	0	0	0	1.00:0.72:1.11:0:0:0	831.22	0	831.22	0	#DIV/0!	1.00:0	158371
1995	13676	| G patch domain-containing protein 8 isoform X2 | 23131 | GPATCH8 | 1453 | nan | nan	XP_011522861	33.77	2	2	2		882.13	632.3	979.24	0	0	0	882.13	632.3	979.24	0	0	0	1.00:0.72:1.11:0:0:0	831.22	0	831.22	0	#DIV/0!	1.00:0	158371
1995	13677	| G patch domain-containing protein 8 isoform X2 | 23131 | GPATCH8 | 1453 | nan | nan	XP_024306428	33.77	2	2	2		882.13	632.3	979.24	0	0	0	882.13	632.3	979.24	0	0	0	1.00:0.72:1.11:0:0:0	831.22	0	831.22	0	#DIV/0!	1.00:0	158371
1995	13678	| G patch domain-containing protein 8 isoform X2 | 23131 | GPATCH8 | 1453 | nan | nan	XP_024306431	33.77	2	2	2		882.13	632.3	979.24	0	0	0	882.13	632.3	979.24	0	0	0	1.00:0.72:1.11:0:0:0	831.22	0	831.22	0	#DIV/0!	1.00:0	158371
1995	13679	| G patch domain-containing protein 8 isoform X2 | 23131 | GPATCH8 | 1453 | nan | nan	XP_011522863	33.77	2	2	2		882.13	632.3	979.24	0	0	0	882.13	632.3	979.24	0	0	0	1.00:0.72:1.11:0:0:0	831.22	0	831.22	0	#DIV/0!	1.00:0	158371
1184	7853	| proteasome assembly chaperone 1 isoform b | 8624 | PSMG1 | 267 | O95456 | sp	NP_982257	33.76	20	4	4		2569	2370.4	2526.3	829.99	958.33	1014.2	2569	2154.1	2160.4	829.99	958.33	1014.2	1.00:0.84:0.84:0.32:0.37:0.39	2876.7	934.16	2294.5	934.16	2.45622	1.00:0.41	30288
1184	7862	| proteasome assembly chaperone 1 isoform 3 | 8624 | PSMG1 | 283 | nan | nan	NP_001248753	33.76	19	4	4		2569	2370.4	2526.3	829.99	958.33	1014.2	2569	2154.1	2160.4	829.99	958.33	1014.2	1.00:0.84:0.84:0.32:0.37:0.39	2876.7	934.16	2294.5	934.16	2.45622	1.00:0.41	32263
1184	7863	| proteasome assembly chaperone 1 isoform a | 8624 | PSMG1 | 288 | O95456 | sp	NP_003711	33.76	18	4	4		2569	2370.4	2526.3	829.99	958.33	1014.2	2569	2154.1	2160.4	829.99	958.33	1014.2	1.00:0.84:0.84:0.32:0.37:0.39	2876.7	934.16	2294.5	934.16	2.45622	1.00:0.41	32854
128	4123	| voltage-dependent anion-selective channel protein 2 isoform 1 | 7417 | VDAC2 | 309 | P45880 | sp	NP_001171712	33.76	17	3	3	Carbamidomethylation	8168	8641.6	11024	0	0	0	8168	8641.6	11024	0	0	0	1.00:1.06:1.35:0:0:0	9277.8	0	9277.8	0	#DIV/0!	1.00:0	33372
128	4242	| voltage-dependent anion-selective channel protein 2 isoform 2 | 7417 | VDAC2 | 294 | P45880 | sp	NP_003366	33.76	18	3	3	Carbamidomethylation	8168	8641.6	11024	0	0	0	8168	8641.6	11024	0	0	0	1.00:1.06:1.35:0:0:0	9277.8	0	9277.8	0	#DIV/0!	1.00:0	31567
128	4243	| voltage-dependent anion-selective channel protein 2 isoform 2 | 7417 | VDAC2 | 294 | P45880 | sp	NP_001311017	33.76	18	3	3	Carbamidomethylation	8168	8641.6	11024	0	0	0	8168	8641.6	11024	0	0	0	1.00:1.06:1.35:0:0:0	9277.8	0	9277.8	0	#DIV/0!	1.00:0	31567
128	4244	| voltage-dependent anion-selective channel protein 2 isoform 2 | 7417 | VDAC2 | 294 | P45880 | sp	NP_001171752	33.76	18	3	3	Carbamidomethylation	8168	8641.6	11024	0	0	0	8168	8641.6	11024	0	0	0	1.00:1.06:1.35:0:0:0	9277.8	0	9277.8	0	#DIV/0!	1.00:0	31567
943	6686	| FAST kinase domain-containing protein 2 mitochondrial | 22868 | FASTKD2 | 710 | Q9NYY8 | sp	NP_055744	33.75	7	3	3		1263.2	1068.1	1628.3	0	0	0	1263.2	1068.1	1628.3	0	0	0	1.00:0.85:1.29:0:0:0	1408.2	0	1408.2	0	#DIV/0!	1.00:0	81463
943	6687	| FAST kinase domain-containing protein 2 mitochondrial | 22868 | FASTKD2 | 710 | Q9NYY8 | sp	NP_001129666	33.75	7	3	3		1263.2	1068.1	1628.3	0	0	0	1263.2	1068.1	1628.3	0	0	0	1.00:0.85:1.29:0:0:0	1408.2	0	1408.2	0	#DIV/0!	1.00:0	81463
943	6688	| FAST kinase domain-containing protein 2 mitochondrial | 22868 | FASTKD2 | 710 | Q9NYY8 | sp	NP_001129665	33.75	7	3	3		1263.2	1068.1	1628.3	0	0	0	1263.2	1068.1	1628.3	0	0	0	1.00:0.85:1.29:0:0:0	1408.2	0	1408.2	0	#DIV/0!	1.00:0	81463
975	4769	| zinc finger protein 318 | 24149 | ZNF318 | 2279 | Q5VUA4 | sp	NP_055160	33.73	4	6	6	Carbamidomethylation	1781.5	1237.9	2980.8	37665	44694	53011	1167.1	1016.5	1878.2	37665	44694	53011	1.00:0.87:1.61:32.27:38.29:45.42	2392.8	45273	1353.9	45273	0.0299052	1.00:33.44	251110
975	4982	| zinc finger protein 318 isoform X1 | 24149 | ZNF318 | 2099 | nan | nan	XP_011512753	33.73	4	6	6	Carbamidomethylation	1781.5	1237.9	2980.8	37665	44694	53011	1167.1	1016.5	1878.2	37665	44694	53011	1.00:0.87:1.61:32.27:38.29:45.42	2392.8	45273	1353.9	45273	0.0299052	1.00:33.44	231993
1036	6238	| syntaxin-binding protein 3 | 6814 | STXBP3 | 592 | O00186 | sp	NP_009200	33.71	7	3	3	Carbamidomethylation	983.42	662.6	974.24	0	0	0	983.42	662.6	974.24	0	0	0	1.00:0.67:0.99:0:0:0	1006.2	0	1006.2	0	#DIV/0!	1.00:0	67764
418	3728	| inorganic pyrophosphatase 2 mitochondrial isoform 1 precursor | 27068 | PPA2 | 334 | Q9H2U2 | sp	NP_789845	33.69	41	9	9	Carbamidomethylation	5428.9	6433.9	8036.9	0	0	0	3649.3	3157.5	4521	0	0	0	1.00:0.87:1.24:0:0:0	6837.8	0	3775.9	0	#DIV/0!	1.00:0	37920
1768	12421	| serine/threonine-protein phosphatase 2A 56 kDa regulatory subunit | 5527 | PPP2R5C | 556 | nan | nan	XP_005267879	33.66	3	1	1		281.58	371.29	472.36	0	0	0	281.58	371.29	472.36	0	0	0	1.00:1.32:1.68:0:0:0	375.07	0	375.07	0	#DIV/0!	1.00:0	64365
1768	12994	| serine/threonine-protein phosphatase 2A 56 kDa regulatory subunit | 5527 | PPP2R5C | 410 | nan | nan	NP_001339845	33.66	3	1	1		281.58	371.29	472.36	0	0	0	281.58	371.29	472.36	0	0	0	1.00:1.32:1.68:0:0:0	375.07	0	375.07	0	#DIV/0!	1.00:0	48250
1768	12995	| serine/threonine-protein phosphatase 2A 56 kDa regulatory subunit | 5527 | PPP2R5C | 449 | Q13362 | sp	XP_005267884	33.66	3	1	1		281.58	371.29	472.36	0	0	0	281.58	371.29	472.36	0	0	0	1.00:1.32:1.68:0:0:0	375.07	0	375.07	0	#DIV/0!	1.00:0	52650
1768	12996	| serine/threonine-protein phosphatase 2A 56 kDa regulatory subunit | 5527 | PPP2R5C | 449 | Q13362 | sp	NP_848702	33.66	3	1	1		281.58	371.29	472.36	0	0	0	281.58	371.29	472.36	0	0	0	1.00:1.32:1.68:0:0:0	375.07	0	375.07	0	#DIV/0!	1.00:0	52626
1768	12997	| serine/threonine-protein phosphatase 2A 56 kDa regulatory subunit | 5527 | PPP2R5C | 449 | Q13362 | sp	XP_011535222	33.66	3	1	1		281.58	371.29	472.36	0	0	0	281.58	371.29	472.36	0	0	0	1.00:1.32:1.68:0:0:0	375.07	0	375.07	0	#DIV/0!	1.00:0	52650
1768	12998	| serine/threonine-protein phosphatase 2A 56 kDa regulatory subunit | 5527 | PPP2R5C | 449 | nan | nan	NP_001339844	33.66	3	1	1		281.58	371.29	472.36	0	0	0	281.58	371.29	472.36	0	0	0	1.00:1.32:1.68:0:0:0	375.07	0	375.07	0	#DIV/0!	1.00:0	52650
1768	13000	| serine/threonine-protein phosphatase 2A 56 kDa regulatory subunit | 5527 | PPP2R5C | 479 | nan | nan	XP_016876912	33.66	3	1	1		281.58	371.29	472.36	0	0	0	281.58	371.29	472.36	0	0	0	1.00:1.32:1.68:0:0:0	375.07	0	375.07	0	#DIV/0!	1.00:0	55594
1768	13001	| serine/threonine-protein phosphatase 2A 56 kDa regulatory subunit | 5527 | PPP2R5C | 485 | nan | nan	NP_001339841	33.66	3	1	1		281.58	371.29	472.36	0	0	0	281.58	371.29	472.36	0	0	0	1.00:1.32:1.68:0:0:0	375.07	0	375.07	0	#DIV/0!	1.00:0	56661
1768	13003	| serine/threonine-protein phosphatase 2A 56 kDa regulatory subunit | 5527 | PPP2R5C | 485 | Q13362 | sp	NP_848701	33.66	3	1	1		281.58	371.29	472.36	0	0	0	281.58	371.29	472.36	0	0	0	1.00:1.32:1.68:0:0:0	375.07	0	375.07	0	#DIV/0!	1.00:0	56661
1768	13004	| serine/threonine-protein phosphatase 2A 56 kDa regulatory subunit | 5527 | PPP2R5C | 500 | nan | nan	XP_005267883	33.66	3	1	1		281.58	371.29	472.36	0	0	0	281.58	371.29	472.36	0	0	0	1.00:1.32:1.68:0:0:0	375.07	0	375.07	0	#DIV/0!	1.00:0	58548
1768	13005	| serine/threonine-protein phosphatase 2A 56 kDa regulatory subunit | 5527 | PPP2R5C | 508 | nan | nan	XP_011535220	33.66	3	1	1		281.58	371.29	472.36	0	0	0	281.58	371.29	472.36	0	0	0	1.00:1.32:1.68:0:0:0	375.07	0	375.07	0	#DIV/0!	1.00:0	59833
1768	13007	| serine/threonine-protein phosphatase 2A 56 kDa regulatory subunit | 5527 | PPP2R5C | 524 | Q13362 | sp	NP_002710	33.66	3	1	1		281.58	371.29	472.36	0	0	0	281.58	371.29	472.36	0	0	0	1.00:1.32:1.68:0:0:0	375.07	0	375.07	0	#DIV/0!	1.00:0	61061
1768	13009	| serine/threonine-protein phosphatase 2A 56 kDa regulatory subunit | 5527 | PPP2R5C | 539 | nan | nan	XP_005267881	33.66	3	1	1		281.58	371.29	472.36	0	0	0	281.58	371.29	472.36	0	0	0	1.00:1.32:1.68:0:0:0	375.07	0	375.07	0	#DIV/0!	1.00:0	62148
1768	13010	| serine/threonine-protein phosphatase 2A 56 kDa regulatory subunit | 5527 | PPP2R5C | 545 | nan | nan	NP_001339843	33.66	3	1	1		281.58	371.29	472.36	0	0	0	281.58	371.29	472.36	0	0	0	1.00:1.32:1.68:0:0:0	375.07	0	375.07	0	#DIV/0!	1.00:0	63215
1768	13012	| serine/threonine-protein phosphatase 2A 56 kDa regulatory subunit | 5527 | PPP2R5C | 579 | nan | nan	NP_001339842	33.66	2	1	1		281.58	371.29	472.36	0	0	0	281.58	371.29	472.36	0	0	0	1.00:1.32:1.68:0:0:0	375.07	0	375.07	0	#DIV/0!	1.00:0	67155
1768	13013	| serine/threonine-protein phosphatase 2A 56 kDa regulatory subunit | 5527 | PPP2R5C | 584 | nan | nan	XP_005267876	33.66	2	1	1		281.58	371.29	472.36	0	0	0	281.58	371.29	472.36	0	0	0	1.00:1.32:1.68:0:0:0	375.07	0	375.07	0	#DIV/0!	1.00:0	67615
1435	7567	| echinoderm microtubule-associated protein-like 4 isoform a | 27436 | EML4 | 981 | Q9HC35 | sp	NP_061936	33.66	7	5	5		3219.6	2287.8	2464.8	0	0	0	2477.2	1764.4	2464.8	0	0	0	1.00:0.71:0.99:0:0:0	3036	0	2235.5	0	#DIV/0!	1.00:0	108903
1435	7621	| echinoderm microtubule-associated protein-like 4 isoform b | 27436 | EML4 | 923 | Q9HC35 | sp	NP_001138548	33.66	7	5	5		3219.6	2287.8	2464.8	0	0	0	2477.2	1764.4	2464.8	0	0	0	1.00:0.71:0.99:0:0:0	3036	0	2235.5	0	#DIV/0!	1.00:0	102431
1435	7959	| echinoderm microtubule-associated protein-like 4 isoform X1 | 27436 | EML4 | 992 | B5MBZ0 | tr	XP_005264324	33.66	7	5	5		3219.6	2287.8	2464.8	0	0	0	2477.2	1764.4	2464.8	0	0	0	1.00:0.71:0.99:0:0:0	3036	0	2235.5	0	#DIV/0!	1.00:0	110178
1435	8097	| echinoderm microtubule-associated protein-like 4 isoform X2 | 27436 | EML4 | 934 | nan | nan	XP_006712054	33.66	7	5	5		3219.6	2287.8	2464.8	0	0	0	2477.2	1764.4	2464.8	0	0	0	1.00:0.71:0.99:0:0:0	3036	0	2235.5	0	#DIV/0!	1.00:0	103706
1080	7806	| exosome complex component RRP46 | 56915 | EXOSC5 | 235 | Q9NQT4 | sp	NP_064543	33.63	26	4	4	Carbamidomethylation	2943	2518.5	3404.5	0	0	0	2943	2038.7	2666.9	0	0	0	1.00:0.69:0.91:0:0:0	3505.7	0	2897	0	#DIV/0!	1.00:0	25249
1179	5869	| epidermal growth factor receptor isoform a precursor | 1956 | EGFR | 1210 | P00533 | sp	NP_005219	33.62	5	4	4	Carbamidomethylation	911.61	962.97	1683.6	0	0	0	911.61	962.97	1358.9	0	0	0	1.00:1.06:1.49:0:0:0	1519.2	0	1194.4	0	#DIV/0!	1.00:0	134277
344	6266	| peptidyl-prolyl cis-trans isomerase A isoform 1 | 5478 | PPIA | 165 | P62937 | sp	NP_066953	33.61	67	10	10	Carbamidomethylation; Acetylation (Protein N-term); Oxidation (M)	96386	84187	86377	8554.1	10344	11049	41236	36326	37537	3909.2	4637.1	5346.4	1.00:0.88:0.91:0.09:0.11:0.13	89356	10687	38367	4876.7	7.86741	1.00:0.13	18012
245	1293	| DNA replication licensing factor MCM7 isoform X1 | 4176 | MCM7 | 612 | nan | nan	XP_005250405	33.6	2	1	1	Acetylation (Protein N-term); Oxidation (M)	486.63	322.74	507.78	0	0	0	486.63	322.74	507.78	0	0	0	1.00:0.66:1.04:0:0:0	439.05	0	439.05	0	#DIV/0!	1.00:0	68616
245	1294	| DNA replication licensing factor MCM7 isoform X1 | 4176 | MCM7 | 612 | nan | nan	XP_016867706	33.6	2	1	1	Acetylation (Protein N-term); Oxidation (M)	486.63	322.74	507.78	0	0	0	486.63	322.74	507.78	0	0	0	1.00:0.66:1.04:0:0:0	439.05	0	439.05	0	#DIV/0!	1.00:0	68616
1683	15883	| malonyl-CoA-acyl carrier protein transacylase mitochondrial | 27349 | MCAT | 390 | Q8IVS2 | sp	NP_775738	33.57	8	2	2		889.53	692.31	1077.8	0	0	0	889.53	692.31	1077.8	0	0	0	1.00:0.78:1.21:0:0:0	886.55	0	886.55	0	#DIV/0!	1.00:0	42962
2133	27855	| mpv17-like protein 2 precursor | 84769 | MPV17L2 | 206 | Q567V2 | sp	NP_116072	33.56	6	1	1		547.81	0	371.84	0	0	0	547.81	0	371.84	0	0	0	1.00:0:0.68:0:0:0	459.82	0	459.82	0	#DIV/0!	1.00:0	23180
1709	13782	| signal recognition particle 9 kDa protein isoform 2 | 6726 | SRP9 | 86 | P49458 | sp	NP_003124	33.55	35	3	3	Carbamidomethylation	4120.4	2900.2	3679.9	0	0	0	4120.4	2900.2	3679.9	0	0	0	1.00:0.70:0.89:0:0:0	3701	0	3701	0	#DIV/0!	1.00:0	10112
1276	12181	| ribose-phosphate pyrophosphokinase 1 isoform 1 | 5631 | PRPS1 | 318 | P60891 | sp	NP_002755	33.54	5	1	1	Carbamidomethylation	288.97	233.84	396.71	0	0	0	288.97	233.84	396.71	0	0	0	1.00:0.81:1.37:0:0:0	306.51	0	306.51	0	#DIV/0!	1.00:0	34834
1011	6416	| tripeptidyl-peptidase 2 isoform 1 | 7174 | TPP2 | 1249 | P29144 | sp	NP_003282	33.51	6	5	5	Carbamidomethylation; Acetylation (Protein N-term)	1691.1	1989.4	1647.2	261.94	278.23	0	1381.8	1677.3	1345.3	261.94	278.23	0	1.00:1.21:0.97:0.19:0.20:0	2080.7	270.09	1468.2	270.09	5.43597	1.00:0.18	138350
1011	6417	| tripeptidyl-peptidase 2 isoform 2 | 7174 | TPP2 | 1262 | P29144 | sp	NP_001317517	33.51	6	5	5	Carbamidomethylation; Acetylation (Protein N-term)	1691.1	1989.4	1647.2	261.94	278.23	0	1381.8	1677.3	1345.3	261.94	278.23	0	1.00:1.21:0.97:0.19:0.20:0	2080.7	270.09	1468.2	270.09	5.43597	1.00:0.18	139765
1011	6418	| tripeptidyl-peptidase 2 isoform X2 | 7174 | TPP2 | 1291 | nan | nan	XP_005254128	33.51	6	5	5	Carbamidomethylation; Acetylation (Protein N-term)	1691.1	1989.4	1647.2	261.94	278.23	0	1381.8	1677.3	1345.3	261.94	278.23	0	1.00:1.21:0.97:0.19:0.20:0	2080.7	270.09	1468.2	270.09	5.43597	1.00:0.18	143035
1011	6419	| tripeptidyl-peptidase 2 isoform X1 | 7174 | TPP2 | 1304 | nan | nan	XP_005254127	33.51	6	5	5	Carbamidomethylation; Acetylation (Protein N-term)	1691.1	1989.4	1647.2	261.94	278.23	0	1381.8	1677.3	1345.3	261.94	278.23	0	1.00:1.21:0.97:0.19:0.20:0	2080.7	270.09	1468.2	270.09	5.43597	1.00:0.18	144451
1714	16844	| CDGSH iron-sulfur domain-containing protein 1 | 55847 | CISD1 | 108 | Q9NZ45 | sp	NP_060934	33.5	26	2	2		2051.6	1419.6	1931.8	0	0	0	2051.6	1419.6	1931.8	0	0	0	1.00:0.69:0.94:0:0:0	2038.1	0	2038.1	0	#DIV/0!	1.00:0	12199
682	6178	| A-kinase anchor protein 8-like isoform X1 | 26993 | AKAP8L | 612 | nan | nan	XP_005259911	33.5	9	3	3		4607.2	3404	4591	0	0	0	4607.2	3404	4591	0	0	0	1.00:0.74:1.00:0:0:0	4200.7	0	4200.7	0	#DIV/0!	1.00:0	68194
682	6180	| A-kinase anchor protein 8-like isoform 1 | 26993 | AKAP8L | 646 | Q9ULX6 | sp	NP_055186	33.5	9	3	3		4607.2	3404	4591	0	0	0	4607.2	3404	4591	0	0	0	1.00:0.74:1.00:0:0:0	4200.7	0	4200.7	0	#DIV/0!	1.00:0	71640
1952	17179	| nucleoporin p58/p45 isoform X2 | 9818 | NUP58 | 566 | nan | nan	XP_005266657	33.48	5	2	2		512.65	486.37	749.51	0	0	0	512.65	486.37	749.51	0	0	0	1.00:0.95:1.46:0:0:0	669.57	0	669.57	0	#DIV/0!	1.00:0	57894
1952	17180	| nucleoporin p58/p45 isoform X1 | 9818 | NUP58 | 570 | nan | nan	XP_011533630	33.48	5	2	2		512.65	486.37	749.51	0	0	0	512.65	486.37	749.51	0	0	0	1.00:0.95:1.46:0:0:0	669.57	0	669.57	0	#DIV/0!	1.00:0	58518
1952	17181	| nucleoporin p58/p45 isoform b | 9818 | NUP58 | 587 | Q9BVL2 | sp	NP_001008564	33.48	5	2	2		512.65	486.37	749.51	0	0	0	512.65	486.37	749.51	0	0	0	1.00:0.95:1.46:0:0:0	669.57	0	669.57	0	#DIV/0!	1.00:0	59754
1952	17182	| nucleoporin p58/p45 isoform a | 9818 | NUP58 | 599 | Q9BVL2 | sp	NP_054808	33.48	5	2	2		512.65	486.37	749.51	0	0	0	512.65	486.37	749.51	0	0	0	1.00:0.95:1.46:0:0:0	669.57	0	669.57	0	#DIV/0!	1.00:0	60897
1952	20889	| nucleoporin p58/p45 isoform X3 | 9818 | NUP58 | 325 | nan | nan	XP_011533631	33.48	9	2	2		512.65	486.37	749.51	0	0	0	512.65	486.37	749.51	0	0	0	1.00:0.95:1.46:0:0:0	669.57	0	669.57	0	#DIV/0!	1.00:0	34455
1952	20890	| nucleoporin p58/p45 isoform X3 | 9818 | NUP58 | 325 | nan | nan	XP_016876370	33.48	9	2	2		512.65	486.37	749.51	0	0	0	512.65	486.37	749.51	0	0	0	1.00:0.95:1.46:0:0:0	669.57	0	669.57	0	#DIV/0!	1.00:0	34455
2207	24267	| Fanconi anemia group J protein isoform X4 | 83990 | BRIP1 | 1202 | nan | nan	XP_011523639	33.47	1	1	1		370.83	277.57	461.66	0	0	0	370.83	277.57	461.66	0	0	0	1.00:0.75:1.24:0:0:0	370.02	0	370.02	0	#DIV/0!	1.00:0	135831
2207	24268	| Fanconi anemia group J protein isoform X3 | 83990 | BRIP1 | 1229 | nan | nan	XP_011523638	33.47	1	1	1		370.83	277.57	461.66	0	0	0	370.83	277.57	461.66	0	0	0	1.00:0.75:1.24:0:0:0	370.02	0	370.02	0	#DIV/0!	1.00:0	138794
2207	24269	| Fanconi anemia group J protein isoform X2 | 83990 | BRIP1 | 1249 | nan | nan	XP_011523637	33.47	1	1	1		370.83	277.57	461.66	0	0	0	370.83	277.57	461.66	0	0	0	1.00:0.75:1.24:0:0:0	370.02	0	370.02	0	#DIV/0!	1.00:0	140991
2207	24270	| Fanconi anemia group J protein | 83990 | BRIP1 | 1249 | Q9BX63 | sp	NP_114432	33.47	1	1	1		370.83	277.57	461.66	0	0	0	370.83	277.57	461.66	0	0	0	1.00:0.75:1.24:0:0:0	370.02	0	370.02	0	#DIV/0!	1.00:0	140867
2207	24271	| Fanconi anemia group J protein isoform X1 | 83990 | BRIP1 | 1269 | nan | nan	XP_011523635	33.47	1	1	1		370.83	277.57	461.66	0	0	0	370.83	277.57	461.66	0	0	0	1.00:0.75:1.24:0:0:0	370.02	0	370.02	0	#DIV/0!	1.00:0	143065
2207	24272	| Fanconi anemia group J protein isoform X1 | 83990 | BRIP1 | 1269 | nan | nan	XP_011523634	33.47	1	1	1		370.83	277.57	461.66	0	0	0	370.83	277.57	461.66	0	0	0	1.00:0.75:1.24:0:0:0	370.02	0	370.02	0	#DIV/0!	1.00:0	143065
2207	24273	| Fanconi anemia group J protein isoform X1 | 83990 | BRIP1 | 1269 | nan | nan	XP_011523636	33.47	1	1	1		370.83	277.57	461.66	0	0	0	370.83	277.57	461.66	0	0	0	1.00:0.75:1.24:0:0:0	370.02	0	370.02	0	#DIV/0!	1.00:0	143065
2207	28226	| Fanconi anemia group J protein isoform X6 | 83990 | BRIP1 | 1088 | nan | nan	XP_016880689	33.47	1	1	1		370.83	277.57	461.66	0	0	0	370.83	277.57	461.66	0	0	0	1.00:0.75:1.24:0:0:0	370.02	0	370.02	0	#DIV/0!	1.00:0	123134
2207	28227	| Fanconi anemia group J protein isoform X7 | 83990 | BRIP1 | 1088 | nan | nan	XP_016880690	33.47	1	1	1		370.83	277.57	461.66	0	0	0	370.83	277.57	461.66	0	0	0	1.00:0.75:1.24:0:0:0	370.02	0	370.02	0	#DIV/0!	1.00:0	123050
2207	28228	| Fanconi anemia group J protein isoform X5 | 83990 | BRIP1 | 1108 | nan | nan	XP_011523640	33.47	1	1	1		370.83	277.57	461.66	0	0	0	370.83	277.57	461.66	0	0	0	1.00:0.75:1.24:0:0:0	370.02	0	370.02	0	#DIV/0!	1.00:0	125332
2111	18320	| disintegrin and metalloproteinase domain-containing protein 10 | 102 | ADAM10 | 748 | O14672 | sp	NP_001101	33.45	4	2	2		386.34	0	590.16	0	0	0	386.34	0	590.16	0	0	0	1.00:0:1.53:0:0:0	614.26	0	614.26	0	#DIV/0!	1.00:0	84142
1930	16920	| phosphoacetylglucosamine mutase isoform X4 | 5238 | PGM3 | 570 | nan | nan	XP_024302228	33.43	6	2	2		0	351.03	520.29	0	0	0	0	351.03	520.29	0	0	0	-:64.00:64.00:-:-:-	547.17	0	547.17	0	#DIV/0!	1.00:0	62941
1894	14712	| desmoglein-2 isoform X1 | 1829 | DSG2 | 940 | nan | nan	XP_024306863	33.42	2	1	1		351.67	271.96	453.39	0	0	0	351.67	271.96	453.39	0	0	0	1.00:0.77:1.29:0:0:0	359.01	0	359.01	0	#DIV/0!	1.00:0	102437
1894	14713	| desmoglein-2 preproprotein | 1829 | DSG2 | 1118 | Q14126 | sp	NP_001934	33.42	2	1	1		351.67	271.96	453.39	0	0	0	351.67	271.96	453.39	0	0	0	1.00:0.77:1.29:0:0:0	359.01	0	359.01	0	#DIV/0!	1.00:0	122294
685	3700	| YLP motif-containing protein 1 | 56252 | YLPM1 | 2146 | P49750 | sp	NP_062535	33.4	8	9	9		3577.3	2634.8	5263.8	0	0	366.47	2104.9	1847.7	2683.9	0	0	0	1.00:0.88:1.28:0:0:0	4662.8	366.47	2212.2	0	#DIV/0!	1.00:0	241643
327	2060	| nucleolar protein 6 alpha isoform | 65083 | NOL6 | 1146 | Q9H6R4 | sp	NP_075068	33.34	13	10	10	Carbamidomethylation	4611.7	3794.5	7061.2	0	0	195.15	2833.2	2691	3751.3	0	0	0	1.00:0.95:1.32:0:0:0	6414.4	195.15	3091.8	0	#DIV/0!	1.00:0	127593
1122	8826	| G protein-regulated inducer of neurite outgrowth 1 | 114787 | GPRIN1 | 1008 | Q7Z2K8 | sp	NP_443131	33.33	3	2	2		816.52	917.36	597.39	0	0	0	816.52	917.36	597.39	0	0	0	1.00:1.12:0.73:0:0:0	901.67	0	901.67	0	#DIV/0!	1.00:0	102399
814	5995	| CDK5 regulatory subunit-associated protein 1 isoform e | 51654 | CDK5RAP1 | 560 | Q96SZ6 | sp	NP_001265098	33.33	13	5	5		2469.9	2023.2	3278	0	0	0	2027.9	1686.3	2466.2	0	0	0	1.00:0.83:1.22:0:0:0	2827.2	0	2060.2	0	#DIV/0!	1.00:0	62950
814	6048	| CDK5 regulatory subunit-associated protein 1 isoform b | 51654 | CDK5RAP1 | 588 | Q96SZ6 | sp	NP_057166	33.33	12	5	5		2469.9	2023.2	3278	0	0	0	2027.9	1686.3	2466.2	0	0	0	1.00:0.83:1.22:0:0:0	2827.2	0	2060.2	0	#DIV/0!	1.00:0	66108
814	6144	| CDK5 regulatory subunit-associated protein 1 isoform c | 51654 | CDK5RAP1 | 586 | Q53H36 | tr	NP_001265096	33.33	12	5	5		2469.9	2023.2	3278	0	0	0	2027.9	1686.3	2466.2	0	0	0	1.00:0.83:1.22:0:0:0	2827.2	0	2060.2	0	#DIV/0!	1.00:0	66017
814	6145	| CDK5 regulatory subunit-associated protein 1 isoform a | 51654 | CDK5RAP1 | 587 | Q96SZ6 | sp	NP_057492	33.33	12	5	5		2469.9	2023.2	3278	0	0	0	2027.9	1686.3	2466.2	0	0	0	1.00:0.83:1.22:0:0:0	2827.2	0	2060.2	0	#DIV/0!	1.00:0	66146
814	6581	| CDK5 regulatory subunit-associated protein 1 isoform X1 | 51654 | CDK5RAP1 | 483 | nan | nan	XP_011527158	33.33	15	5	5		2469.9	2023.2	3278	0	0	0	2027.9	1686.3	2466.2	0	0	0	1.00:0.83:1.22:0:0:0	2827.2	0	2060.2	0	#DIV/0!	1.00:0	54286
814	7009	| CDK5 regulatory subunit-associated protein 1 isoform X4 | 51654 | CDK5RAP1 | 404 | nan | nan	XP_024307660	33.33	18	5	5		2469.9	2023.2	3278	0	0	0	2027.9	1686.3	2466.2	0	0	0	1.00:0.83:1.22:0:0:0	2827.2	0	2060.2	0	#DIV/0!	1.00:0	45409
814	7010	| CDK5 regulatory subunit-associated protein 1 isoform X4 | 51654 | CDK5RAP1 | 404 | nan | nan	XP_024307663	33.33	18	5	5		2469.9	2023.2	3278	0	0	0	2027.9	1686.3	2466.2	0	0	0	1.00:0.83:1.22:0:0:0	2827.2	0	2060.2	0	#DIV/0!	1.00:0	45409
814	7011	| CDK5 regulatory subunit-associated protein 1 isoform X4 | 51654 | CDK5RAP1 | 404 | nan | nan	XP_024307661	33.33	18	5	5		2469.9	2023.2	3278	0	0	0	2027.9	1686.3	2466.2	0	0	0	1.00:0.83:1.22:0:0:0	2827.2	0	2060.2	0	#DIV/0!	1.00:0	45409
814	7012	| CDK5 regulatory subunit-associated protein 1 isoform X4 | 51654 | CDK5RAP1 | 404 | nan | nan	XP_024307662	33.33	18	5	5		2469.9	2023.2	3278	0	0	0	2027.9	1686.3	2466.2	0	0	0	1.00:0.83:1.22:0:0:0	2827.2	0	2060.2	0	#DIV/0!	1.00:0	45409
814	7013	| CDK5 regulatory subunit-associated protein 1 isoform X3 | 51654 | CDK5RAP1 | 460 | nan | nan	XP_011527161	33.33	16	5	5		2469.9	2023.2	3278	0	0	0	2027.9	1686.3	2466.2	0	0	0	1.00:0.83:1.22:0:0:0	2827.2	0	2060.2	0	#DIV/0!	1.00:0	51919
814	7014	| CDK5 regulatory subunit-associated protein 1 isoform X3 | 51654 | CDK5RAP1 | 460 | nan | nan	XP_011527160	33.33	16	5	5		2469.9	2023.2	3278	0	0	0	2027.9	1686.3	2466.2	0	0	0	1.00:0.83:1.22:0:0:0	2827.2	0	2060.2	0	#DIV/0!	1.00:0	51919
814	7015	| CDK5 regulatory subunit-associated protein 1 isoform X2 | 51654 | CDK5RAP1 | 477 | nan | nan	XP_011527159	33.33	15	5	5		2469.9	2023.2	3278	0	0	0	2027.9	1686.3	2466.2	0	0	0	1.00:0.83:1.22:0:0:0	2827.2	0	2060.2	0	#DIV/0!	1.00:0	53808
751	6339	| synaptosomal-associated protein 23 isoform SNAP23A | 8773 | SNAP23 | 211 | O00161 | sp	NP_003816	33.32	40	6	6	Carbamidomethylation; Acetylation (Protein N-term)	3714.3	3196.3	4405.2	0	0	231.57	2434.4	2095.2	3022	0	0	0	1.00:0.86:1.24:0:0:0	3771.9	231.57	2517.2	0	#DIV/0!	1.00:0	23354
751	6340	| synaptosomal-associated protein 23 isoform X3 | 8773 | SNAP23 | 213 | nan | nan	XP_016878182	33.32	40	6	6	Carbamidomethylation; Acetylation (Protein N-term)	3714.3	3196.3	4405.2	0	0	231.57	2434.4	2095.2	3022	0	0	0	1.00:0.86:1.24:0:0:0	3771.9	231.57	2517.2	0	#DIV/0!	1.00:0	23831
751	6341	| synaptosomal-associated protein 23 isoform X3 | 8773 | SNAP23 | 213 | nan | nan	XP_016878183	33.32	40	6	6	Carbamidomethylation; Acetylation (Protein N-term)	3714.3	3196.3	4405.2	0	0	231.57	2434.4	2095.2	3022	0	0	0	1.00:0.86:1.24:0:0:0	3771.9	231.57	2517.2	0	#DIV/0!	1.00:0	23831
751	6342	| synaptosomal-associated protein 23 isoform X2 | 8773 | SNAP23 | 222 | nan | nan	XP_006720788	33.32	38	6	6	Carbamidomethylation; Acetylation (Protein N-term)	3714.3	3196.3	4405.2	0	0	231.57	2434.4	2095.2	3022	0	0	0	1.00:0.86:1.24:0:0:0	3771.9	231.57	2517.2	0	#DIV/0!	1.00:0	24659
751	6343	| synaptosomal-associated protein 23 isoform X1 | 8773 | SNAP23 | 224 | nan | nan	XP_016878181	33.32	38	6	6	Carbamidomethylation; Acetylation (Protein N-term)	3714.3	3196.3	4405.2	0	0	231.57	2434.4	2095.2	3022	0	0	0	1.00:0.86:1.24:0:0:0	3771.9	231.57	2517.2	0	#DIV/0!	1.00:0	25136
1988	20824	| Golgi resident protein GCP60 | 64746 | ACBD3 | 528 | Q9H3P7 | sp	NP_073572	33.31	2	1	1		0	556.2	363.53	0	0	0	0	556.2	363.53	0	0	0	-:64.00:64.00:-:-:-	459.87	0	459.87	0	#DIV/0!	1.00:0	60593
2056	25967	10295 BCKDK 335 O14874 sp	NP_001258855	33.31	6	1	1		961.43	648.66	929.92	0	0	0	961.43	648.66	929.92	0	0	0	1.00:0.67:0.97:0:0:0	846.67	0	846.67	0	#DIV/0!	1.00:0	37768
2056	25968	10295 BCKDK 365 O14874 sp	NP_001116429	33.31	6	1	1		961.43	648.66	929.92	0	0	0	961.43	648.66	929.92	0	0	0	1.00:0.67:0.97:0:0:0	846.67	0	846.67	0	#DIV/0!	1.00:0	41090
2056	25969	| 3-methyl-2-oxobutanoate dehydrogenase | 10295 | BCKDK | 410 | nan | nan	XP_016878348	33.31	5	1	1		961.43	648.66	929.92	0	0	0	961.43	648.66	929.92	0	0	0	1.00:0.67:0.97:0:0:0	846.67	0	846.67	0	#DIV/0!	1.00:0	46116
2056	25970	10295 BCKDK 412 O14874 sp	NP_005872	33.31	5	1	1		961.43	648.66	929.92	0	0	0	961.43	648.66	929.92	0	0	0	1.00:0.67:0.97:0:0:0	846.67	0	846.67	0	#DIV/0!	1.00:0	46360
1327	8213	| methylthioribulose-1-phosphate dehydratase | 51074 | APIP | 242 | Q96GX9 | sp	NP_057041	33.23	19	3	3	Carbamidomethylation	1749.4	1208.7	1275.6	0	0	0	1749.4	1208.7	1275.6	0	0	0	1.00:0.69:0.73:0:0:0	1725.2	0	1725.2	0	#DIV/0!	1.00:0	27125
1327	8414	| methylthioribulose-1-phosphate dehydratase isoform X1 | 51074 | APIP | 259 | nan | nan	XP_011518456	33.23	18	3	3	Carbamidomethylation	1749.4	1208.7	1275.6	0	0	0	1749.4	1208.7	1275.6	0	0	0	1.00:0.69:0.73:0:0:0	1725.2	0	1725.2	0	#DIV/0!	1.00:0	29300
420	2466	| aladin isoform 1 | 8086 | AAAS | 546 | Q9NRG9 | sp	NP_056480	33.22	33	13	13	Carbamidomethylation	8626.3	7559.3	9445.3	463.34	1177	1126.1	4666.3	3825.4	4398.4	463.34	524.74	677.4	1.00:0.82:0.94:0.10:0.11:0.15	9217	1105.6	4296.7	555.16	7.73957	1.00:0.13	59574
420	2820	| aladin isoform X1 | 8086 | AAAS | 560 | nan | nan	XP_011537080	33.22	32	13	13	Carbamidomethylation	8626.3	7559.3	9445.3	463.34	1177	1126.1	4666.3	3825.4	4398.4	463.34	524.74	677.4	1.00:0.82:0.94:0.10:0.11:0.15	9217	1105.6	4296.7	555.16	7.73957	1.00:0.13	60942
930	6384	| putative methyltransferase C9orf114 | 51490 | SPOUT1 | 376 | Q5T280 | sp	NP_057474	33.21	24	6	6	Carbamidomethylation	6773.8	5509.4	6994.5	0	0	0	5057.6	3957.1	5404.7	0	0	0	1.00:0.78:1.07:0:0:0	6425.9	0	4806.5	0	#DIV/0!	1.00:0	42009
930	6385	| putative methyltransferase C9orf114 isoform X1 | 51490 | SPOUT1 | 458 | nan | nan	XP_016870293	33.21	20	6	6	Carbamidomethylation	6773.8	5509.4	6994.5	0	0	0	5057.6	3957.1	5404.7	0	0	0	1.00:0.78:1.07:0:0:0	6425.9	0	4806.5	0	#DIV/0!	1.00:0	50672
1615	20608	| small acidic protein | 10944 | C11orf58 | 183 | O00193 | sp	NP_055082	33.18	9	1	1		1405.3	1062.2	941.26	0	0	0	1405.3	1062.2	941.26	0	0	0	1.00:0.76:0.67:0:0:0	1136.2	0	1136.2	0	#DIV/0!	1.00:0	20333
1053	14039	| reticulon-3 isoform a | 10313 | RTN3 | 236 | O95197 | sp	NP_006045	33.16	28	4	4	Carbamidomethylation; Acetylation (Protein N-term)	7086.7	6357.6	8552.9	0	0	0	6024.3	5392.4	7341	0	0	0	1.00:0.90:1.22:0:0:0	7332.4	0	6252.6	0	#DIV/0!	1.00:0	25609
527	2662	| NF-kappa-B-repressing factor isoform X1 | 55922 | NKRF | 690 | O15226 | sp	XP_011529667	33.16	22	13	13	Carbamidomethylation	6670.8	5517.4	8369.1	0	803.26	792.68	3799.5	2704.5	3393.9	0	0	0	1.00:0.71:0.89:0:0:0	7395.4	1138.9	3299.3	0	#DIV/0!	1.00:0	77673
527	2663	| NF-kappa-B-repressing factor isoform 2 | 55922 | NKRF | 690 | O15226 | sp	NP_001166959	33.16	22	13	13	Carbamidomethylation	6670.8	5517.4	8369.1	0	803.26	792.68	3799.5	2704.5	3393.9	0	0	0	1.00:0.71:0.89:0:0:0	7395.4	1138.9	3299.3	0	#DIV/0!	1.00:0	77673
527	2664	| NF-kappa-B-repressing factor isoform 2 | 55922 | NKRF | 690 | O15226 | sp	NP_060014	33.16	22	13	13	Carbamidomethylation	6670.8	5517.4	8369.1	0	803.26	792.68	3799.5	2704.5	3393.9	0	0	0	1.00:0.71:0.89:0:0:0	7395.4	1138.9	3299.3	0	#DIV/0!	1.00:0	77673
527	2665	| NF-kappa-B-repressing factor isoform 1 | 55922 | NKRF | 705 | O15226 | sp	NP_001166958	33.16	21	13	13	Carbamidomethylation	6670.8	5517.4	8369.1	0	803.26	792.68	3799.5	2704.5	3393.9	0	0	0	1.00:0.71:0.89:0:0:0	7395.4	1138.9	3299.3	0	#DIV/0!	1.00:0	79496
1466	10117	| septin-2 isoform g | 4735 | SEPT2 | 321 | nan | nan	NP_001336234	33.15	14	3	3		772.94	770.93	1117.2	0	0	0	772.94	770.93	1117.2	0	0	0	1.00:1.00:1.45:0:0:0	1125.2	0	1125.2	0	#DIV/0!	1.00:0	36940
1466	10118	| septin-2 isoform g | 4735 | SEPT2 | 321 | nan | nan	NP_001336233	33.15	14	3	3		772.94	770.93	1117.2	0	0	0	772.94	770.93	1117.2	0	0	0	1.00:1.00:1.45:0:0:0	1125.2	0	1125.2	0	#DIV/0!	1.00:0	36940
1466	10119	| septin-2 isoform g | 4735 | SEPT2 | 321 | nan | nan	NP_001336235	33.15	14	3	3		772.94	770.93	1117.2	0	0	0	772.94	770.93	1117.2	0	0	0	1.00:1.00:1.45:0:0:0	1125.2	0	1125.2	0	#DIV/0!	1.00:0	36940
1466	10330	| septin-2 isoform f | 4735 | SEPT2 | 358 | nan | nan	NP_001336231	33.15	13	3	3		772.94	770.93	1117.2	0	0	0	772.94	770.93	1117.2	0	0	0	1.00:1.00:1.45:0:0:0	1125.2	0	1125.2	0	#DIV/0!	1.00:0	41214
1466	10331	| septin-2 isoform a | 4735 | SEPT2 | 361 | Q15019 | sp	NP_006146	33.15	12	3	3		772.94	770.93	1117.2	0	0	0	772.94	770.93	1117.2	0	0	0	1.00:1.00:1.45:0:0:0	1125.2	0	1125.2	0	#DIV/0!	1.00:0	41487
1466	10332	| septin-2 isoform X3 | 4735 | SEPT2 | 361 | nan | nan	XP_024308693	33.15	12	3	3		772.94	770.93	1117.2	0	0	0	772.94	770.93	1117.2	0	0	0	1.00:1.00:1.45:0:0:0	1125.2	0	1125.2	0	#DIV/0!	1.00:0	41487
1466	10333	| septin-2 isoform X3 | 4735 | SEPT2 | 361 | nan | nan	XP_024308691	33.15	12	3	3		772.94	770.93	1117.2	0	0	0	772.94	770.93	1117.2	0	0	0	1.00:1.00:1.45:0:0:0	1125.2	0	1125.2	0	#DIV/0!	1.00:0	41487
1466	10334	| septin-2 isoform a | 4735 | SEPT2 | 361 | Q15019 | sp	NP_004395	33.15	12	3	3		772.94	770.93	1117.2	0	0	0	772.94	770.93	1117.2	0	0	0	1.00:1.00:1.45:0:0:0	1125.2	0	1125.2	0	#DIV/0!	1.00:0	41487
1466	10335	| septin-2 isoform a | 4735 | SEPT2 | 361 | Q15019 | sp	NP_001307964	33.15	12	3	3		772.94	770.93	1117.2	0	0	0	772.94	770.93	1117.2	0	0	0	1.00:1.00:1.45:0:0:0	1125.2	0	1125.2	0	#DIV/0!	1.00:0	41487
1466	10336	| septin-2 isoform X3 | 4735 | SEPT2 | 361 | Q15019 | sp	XP_016859694	33.15	12	3	3		772.94	770.93	1117.2	0	0	0	772.94	770.93	1117.2	0	0	0	1.00:1.00:1.45:0:0:0	1125.2	0	1125.2	0	#DIV/0!	1.00:0	41487
1466	10337	| septin-2 isoform a | 4735 | SEPT2 | 361 | nan | nan	NP_001336218	33.15	12	3	3		772.94	770.93	1117.2	0	0	0	772.94	770.93	1117.2	0	0	0	1.00:1.00:1.45:0:0:0	1125.2	0	1125.2	0	#DIV/0!	1.00:0	41487
1466	10338	| septin-2 isoform X3 | 4735 | SEPT2 | 361 | nan | nan	XP_024308692	33.15	12	3	3		772.94	770.93	1117.2	0	0	0	772.94	770.93	1117.2	0	0	0	1.00:1.00:1.45:0:0:0	1125.2	0	1125.2	0	#DIV/0!	1.00:0	41487
1466	10339	| septin-2 isoform a | 4735 | SEPT2 | 361 | nan | nan	NP_001336219	33.15	12	3	3		772.94	770.93	1117.2	0	0	0	772.94	770.93	1117.2	0	0	0	1.00:1.00:1.45:0:0:0	1125.2	0	1125.2	0	#DIV/0!	1.00:0	41487
1466	10340	| septin-2 isoform a | 4735 | SEPT2 | 361 | nan | nan	NP_001336220	33.15	12	3	3		772.94	770.93	1117.2	0	0	0	772.94	770.93	1117.2	0	0	0	1.00:1.00:1.45:0:0:0	1125.2	0	1125.2	0	#DIV/0!	1.00:0	41487
1466	10341	| septin-2 isoform c | 4735 | SEPT2 | 371 | nan | nan	NP_001336217	33.15	12	3	3		772.94	770.93	1117.2	0	0	0	772.94	770.93	1117.2	0	0	0	1.00:1.00:1.45:0:0:0	1125.2	0	1125.2	0	#DIV/0!	1.00:0	42685
1466	10342	| septin-2 isoform e | 4735 | SEPT2 | 416 | nan | nan	NP_001336216	33.15	11	3	3		772.94	770.93	1117.2	0	0	0	772.94	770.93	1117.2	0	0	0	1.00:1.00:1.45:0:0:0	1125.2	0	1125.2	0	#DIV/0!	1.00:0	47980
1466	10345	| septin-2 isoform X2 | 4735 | SEPT2 | 423 | nan | nan	XP_024308690	33.15	11	3	3		772.94	770.93	1117.2	0	0	0	772.94	770.93	1117.2	0	0	0	1.00:1.00:1.45:0:0:0	1125.2	0	1125.2	0	#DIV/0!	1.00:0	48799
1466	10346	| septin-2 isoform X1 | 4735 | SEPT2 | 428 | nan | nan	XP_024308689	33.15	11	3	3		772.94	770.93	1117.2	0	0	0	772.94	770.93	1117.2	0	0	0	1.00:1.00:1.45:0:0:0	1125.2	0	1125.2	0	#DIV/0!	1.00:0	49390
1466	10347	| septin-2 isoform X1 | 4735 | SEPT2 | 428 | nan | nan	XP_024308688	33.15	11	3	3		772.94	770.93	1117.2	0	0	0	772.94	770.93	1117.2	0	0	0	1.00:1.00:1.45:0:0:0	1125.2	0	1125.2	0	#DIV/0!	1.00:0	49390
1901	21098	| ubiquitin-conjugating enzyme E2 S | 27338 | UBE2S | 222 | Q16763 | sp	NP_055316	33.14	12	2	2		1426.8	955.49	1091.4	0	0	0	1426.8	955.49	1091.4	0	0	0	1.00:0.67:0.76:0:0:0	1157.9	0	1157.9	0	#DIV/0!	1.00:0	23845
1144	8102	| anamorsin isoform 2 | 57019 | CIAPIN1 | 299 | Q6FI81 | sp	NP_001295276	33.14	19	4	4	Carbamidomethylation	2348.2	3053.2	2997.7	0	0	0	1878.4	2549	2601.9	0	0	0	1.00:1.36:1.39:0:0:0	2799.7	0	2343.1	0	#DIV/0!	1.00:0	32213
1144	8103	| anamorsin isoform 1 | 57019 | CIAPIN1 | 312 | Q6FI81 | sp	NP_064709	33.14	19	4	4	Carbamidomethylation	2348.2	3053.2	2997.7	0	0	0	1878.4	2549	2601.9	0	0	0	1.00:1.36:1.39:0:0:0	2799.7	0	2343.1	0	#DIV/0!	1.00:0	33582
787	8788	| emerin | 2010 | EMD | 254 | P50402 | sp	NP_000108	33.12	28	5	5	Acetylation (Protein N-term)	3037.5	3189.7	4046.6	622.32	0	565.56	2849.6	2495.2	3277.8	622.32	0	565.56	1.00:0.88:1.15:0.22:0:0.20	3562.6	593.94	2874.2	593.94	4.83921	1.00:0.21	28994
972	4362	| protein PRRC2C isoform X14 | 23215 | PRRC2C | 2774 | nan | nan	XP_005245083	33.09	3	5	5		1783.5	1132.4	1284.3	0	0	0	1490.5	1132.4	1006.1	0	0	0	1.00:0.76:0.68:0:0:0	1879.2	0	1308.1	0	#DIV/0!	1.00:0	304210
972	4363	| protein PRRC2C isoform X13 | 23215 | PRRC2C | 2779 | nan | nan	XP_005245082	33.09	3	5	5		1783.5	1132.4	1284.3	0	0	0	1490.5	1132.4	1006.1	0	0	0	1.00:0.76:0.68:0:0:0	1879.2	0	1308.1	0	#DIV/0!	1.00:0	304775
972	4364	| protein PRRC2C | 23215 | PRRC2C | 2817 | Q9Y520 | sp	NP_055987	33.09	3	5	5		1783.5	1132.4	1284.3	0	0	0	1490.5	1132.4	1006.1	0	0	0	1.00:0.76:0.68:0:0:0	1879.2	0	1308.1	0	#DIV/0!	1.00:0	308606
972	4365	| protein PRRC2C isoform X11 | 23215 | PRRC2C | 2819 | E7EPN9 | tr	XP_005245081	33.09	3	5	5		1783.5	1132.4	1284.3	0	0	0	1490.5	1132.4	1006.1	0	0	0	1.00:0.76:0.68:0:0:0	1879.2	0	1308.1	0	#DIV/0!	1.00:0	308776
972	4366	| protein PRRC2C isoform X10 | 23215 | PRRC2C | 2824 | nan | nan	XP_005245080	33.09	3	5	5		1783.5	1132.4	1284.3	0	0	0	1490.5	1132.4	1006.1	0	0	0	1.00:0.76:0.68:0:0:0	1879.2	0	1308.1	0	#DIV/0!	1.00:0	309341
972	4367	| protein PRRC2C isoform X9 | 23215 | PRRC2C | 2853 | nan | nan	XP_016856250	33.09	3	5	5		1783.5	1132.4	1284.3	0	0	0	1490.5	1132.4	1006.1	0	0	0	1.00:0.76:0.68:0:0:0	1879.2	0	1308.1	0	#DIV/0!	1.00:0	312515
972	4368	| protein PRRC2C isoform X8 | 23215 | PRRC2C | 2858 | nan | nan	XP_005245077	33.09	3	5	5		1783.5	1132.4	1284.3	0	0	0	1490.5	1132.4	1006.1	0	0	0	1.00:0.76:0.68:0:0:0	1879.2	0	1308.1	0	#DIV/0!	1.00:0	313080
972	4369	| protein PRRC2C isoform X6 | 23215 | PRRC2C | 2896 | nan | nan	XP_016856249	33.09	3	5	5		1783.5	1132.4	1284.3	0	0	0	1490.5	1132.4	1006.1	0	0	0	1.00:0.76:0.68:0:0:0	1879.2	0	1308.1	0	#DIV/0!	1.00:0	317061
972	4370	| protein PRRC2C isoform X5 | 23215 | PRRC2C | 2896 | Q9Y520 | sp	XP_006711301	33.09	3	5	5		1783.5	1132.4	1284.3	0	0	0	1490.5	1132.4	1006.1	0	0	0	1.00:0.76:0.68:0:0:0	1879.2	0	1308.1	0	#DIV/0!	1.00:0	316911
972	4371	| protein PRRC2C isoform X4 | 23215 | PRRC2C | 2898 | nan | nan	XP_005245075	33.09	3	5	5		1783.5	1132.4	1284.3	0	0	0	1490.5	1132.4	1006.1	0	0	0	1.00:0.76:0.68:0:0:0	1879.2	0	1308.1	0	#DIV/0!	1.00:0	317231
972	4372	| protein PRRC2C isoform X3 | 23215 | PRRC2C | 2898 | Q9Y520 | sp	XP_005245074	33.09	3	5	5		1783.5	1132.4	1284.3	0	0	0	1490.5	1132.4	1006.1	0	0	0	1.00:0.76:0.68:0:0:0	1879.2	0	1308.1	0	#DIV/0!	1.00:0	317081
972	4373	| protein PRRC2C isoform X2 | 23215 | PRRC2C | 2901 | nan | nan	XP_005245073	33.09	3	5	5		1783.5	1132.4	1284.3	0	0	0	1490.5	1132.4	1006.1	0	0	0	1.00:0.76:0.68:0:0:0	1879.2	0	1308.1	0	#DIV/0!	1.00:0	317475
972	4374	| protein PRRC2C isoform X1 | 23215 | PRRC2C | 2903 | nan | nan	XP_005245072	33.09	3	5	5		1783.5	1132.4	1284.3	0	0	0	1490.5	1132.4	1006.1	0	0	0	1.00:0.76:0.68:0:0:0	1879.2	0	1308.1	0	#DIV/0!	1.00:0	317646
1424	12474	| H/ACA ribonucleoprotein complex subunit 2 isoform a | 55651 | NHP2 | 153 | Q9NX24 | sp	NP_060308	33.07	35	3	3	Carbamidomethylation	3227.8	2352.2	3134.7	0	0	0	3227.8	2352.2	3134.7	0	0	0	1.00:0.73:0.97:0:0:0	3016.9	0	3016.9	0	#DIV/0!	1.00:0	17201
1564	11978	| nitric oxide synthase-interacting protein isoform X5 | 51070 | NOSIP | 301 | Q9Y314 | sp	XP_016882341	33.06	17	3	3		390.4	622.09	479.24	0	0	0	390.4	622.09	479.24	0	0	0	1.00:1.59:1.23:0:0:0	860.13	0	860.13	0	#DIV/0!	1.00:0	33172
1564	11979	| nitric oxide synthase-interacting protein | 51070 | NOSIP | 301 | Q9Y314 | sp	NP_057037	33.06	17	3	3		390.4	622.09	479.24	0	0	0	390.4	622.09	479.24	0	0	0	1.00:1.59:1.23:0:0:0	860.13	0	860.13	0	#DIV/0!	1.00:0	33172
1564	11980	| nitric oxide synthase-interacting protein | 51070 | NOSIP | 301 | Q9Y314 | sp	NP_001257889	33.06	17	3	3		390.4	622.09	479.24	0	0	0	390.4	622.09	479.24	0	0	0	1.00:1.59:1.23:0:0:0	860.13	0	860.13	0	#DIV/0!	1.00:0	33172
1564	11981	| nitric oxide synthase-interacting protein isoform X5 | 51070 | NOSIP | 301 | Q9Y314 | sp	XP_016882340	33.06	17	3	3		390.4	622.09	479.24	0	0	0	390.4	622.09	479.24	0	0	0	1.00:1.59:1.23:0:0:0	860.13	0	860.13	0	#DIV/0!	1.00:0	33172
1564	11982	| nitric oxide synthase-interacting protein isoform X6 | 51070 | NOSIP | 302 | nan | nan	XP_011525319	33.06	17	3	3		390.4	622.09	479.24	0	0	0	390.4	622.09	479.24	0	0	0	1.00:1.59:1.23:0:0:0	860.13	0	860.13	0	#DIV/0!	1.00:0	33303
1564	11983	| nitric oxide synthase-interacting protein isoform X2 | 51070 | NOSIP | 347 | nan | nan	XP_024307297	33.06	14	3	3		390.4	622.09	479.24	0	0	0	390.4	622.09	479.24	0	0	0	1.00:1.59:1.23:0:0:0	860.13	0	860.13	0	#DIV/0!	1.00:0	37757
1564	11984	| nitric oxide synthase-interacting protein isoform X2 | 51070 | NOSIP | 347 | nan | nan	XP_024307298	33.06	14	3	3		390.4	622.09	479.24	0	0	0	390.4	622.09	479.24	0	0	0	1.00:1.59:1.23:0:0:0	860.13	0	860.13	0	#DIV/0!	1.00:0	37757
1564	11985	| nitric oxide synthase-interacting protein isoform X1 | 51070 | NOSIP | 348 | nan | nan	XP_024307296	33.06	14	3	3		390.4	622.09	479.24	0	0	0	390.4	622.09	479.24	0	0	0	1.00:1.59:1.23:0:0:0	860.13	0	860.13	0	#DIV/0!	1.00:0	37888
697	3112	| signal-induced proliferation-associated 1-like protein 3 isoform X1 | 23094 | SIPA1L3 | 1781 | O60292 | sp	XP_011524959	33.04	6	7	7	Carbamidomethylation	2961.7	2271.2	2961.4	0	0	0	1859.5	1302.5	1754.3	0	0	0	1.00:0.70:0.94:0:0:0	2950.6	0	1638.7	0	#DIV/0!	1.00:0	194608
697	3113	| signal-induced proliferation-associated 1-like protein 3 isoform X1 | 23094 | SIPA1L3 | 1781 | O60292 | sp	XP_005258728	33.04	6	7	7	Carbamidomethylation	2961.7	2271.2	2961.4	0	0	0	1859.5	1302.5	1754.3	0	0	0	1.00:0.70:0.94:0:0:0	2950.6	0	1638.7	0	#DIV/0!	1.00:0	194608
697	3114	| signal-induced proliferation-associated 1-like protein 3 | 23094 | SIPA1L3 | 1781 | O60292 | sp	NP_055888	33.04	6	7	7	Carbamidomethylation	2961.7	2271.2	2961.4	0	0	0	1859.5	1302.5	1754.3	0	0	0	1.00:0.70:0.94:0:0:0	2950.6	0	1638.7	0	#DIV/0!	1.00:0	194608
697	3115	| signal-induced proliferation-associated 1-like protein 3 isoform X2 | 23094 | SIPA1L3 | 1780 | nan | nan	XP_016882007	33.04	6	7	7	Carbamidomethylation	2961.7	2271.2	2961.4	0	0	0	1859.5	1302.5	1754.3	0	0	0	1.00:0.70:0.94:0:0:0	2950.6	0	1638.7	0	#DIV/0!	1.00:0	194480
1869	15030	| signal recognition particle 19 kDa protein isoform 1 | 6728 | SRP19 | 144 | P09132 | sp	NP_003126	33.01	18	2	2	Carbamidomethylation	1105.7	781.99	755.11	0	0	0	1105.7	781.99	755.11	0	0	0	1.00:0.71:0.68:0:0:0	880.94	0	880.94	0	#DIV/0!	1.00:0	16156
1869	15270	| signal recognition particle 19 kDa protein isoform 6 | 6728 | SRP19 | 101 | nan | nan	NP_001191128	33.01	26	2	2	Carbamidomethylation	1105.7	781.99	755.11	0	0	0	1105.7	781.99	755.11	0	0	0	1.00:0.71:0.68:0:0:0	880.94	0	880.94	0	#DIV/0!	1.00:0	11509
1869	16646	| signal recognition particle 19 kDa protein isoform 3 | 6728 | SRP19 | 120 | P09132 | sp	NP_001191123	33.01	22	2	2	Carbamidomethylation	1105.7	781.99	755.11	0	0	0	1105.7	781.99	755.11	0	0	0	1.00:0.71:0.68:0:0:0	880.94	0	880.94	0	#DIV/0!	1.00:0	13654
2136	21048	| YTH domain-containing family protein 1 | 54915 | YTHDF1 | 559 | Q9BYJ9 | sp	NP_060268	32.97	3	1	1		352.88	0	551.58	0	0	0	352.88	0	551.58	0	0	0	1.00:0:1.56:0:0:0	452.23	0	452.23	0	#DIV/0!	1.00:0	60874
188	3248	| scaffold attachment factor B1 isoform 6 | 6294 | SAFB | 914 | Q15424 | sp	NP_001307501	32.97	11	8	8	Carbamidomethylation; Acetylation (Protein N-term)	13909	13155	17339	0	0	0	9191.8	8612.4	11281	0	0	0	1.00:0.94:1.23:0:0:0	14801	0	9695.2	0	#DIV/0!	1.00:0	102555
188	3249	| scaffold attachment factor B1 isoform 3 | 6294 | SAFB | 915 | Q15424 | sp	NP_002958	32.97	11	8	8	Carbamidomethylation; Acetylation (Protein N-term)	13909	13155	17339	0	0	0	9191.8	8612.4	11281	0	0	0	1.00:0.94:1.23:0:0:0	14801	0	9695.2	0	#DIV/0!	1.00:0	102642
188	3250	| scaffold attachment factor B1 isoform 2 | 6294 | SAFB | 916 | Q15424 | sp	NP_001188268	32.97	11	8	8	Carbamidomethylation; Acetylation (Protein N-term)	13909	13155	17339	0	0	0	9191.8	8612.4	11281	0	0	0	1.00:0.94:1.23:0:0:0	14801	0	9695.2	0	#DIV/0!	1.00:0	102768
188	3251	| scaffold attachment factor B1 isoform 1 | 6294 | SAFB | 917 | Q15424 | sp	NP_001188267	32.97	11	8	8	Carbamidomethylation; Acetylation (Protein N-term)	13909	13155	17339	0	0	0	9191.8	8612.4	11281	0	0	0	1.00:0.94:1.23:0:0:0	14801	0	9695.2	0	#DIV/0!	1.00:0	102855
427	2136	| U4/U6.U5 tri-snRNP-associated protein 1 isoform X1 | 9092 | SART1 | 702 | nan | nan	XP_011543646	32.95	17	8	8		3186.2	2963.3	4872.4	0	0	0	1773.7	1629.6	2320.7	0	0	0	1.00:0.92:1.31:0:0:0	4258.2	0	1908	0	#DIV/0!	1.00:0	79670
427	2139	| U4/U6.U5 tri-snRNP-associated protein 1 | 9092 | SART1 | 800 | O43290 | sp	NP_005137	32.95	15	8	8		3186.2	2963.3	4872.4	0	0	0	1773.7	1629.6	2320.7	0	0	0	1.00:0.92:1.31:0:0:0	4258.2	0	1908	0	#DIV/0!	1.00:0	90255
2107	27665	| diphosphoinositol polyphosphate phosphohydrolase 2 isoform alpha | 11163 | NUDT4 | 180 | Q9NZJ9 | sp	NP_061967	32.94	8	1	1		329.12	0	459.9	0	0	0	329.12	0	459.9	0	0	0	1.00:0:1.40:0:0:0	394.51	0	394.51	0	#DIV/0!	1.00:0	20306
2107	27666	| nudix hydrolase 4B | 440672 | NUDT4B | 181 | nan | nan	NP_001342336	32.94	8	1	1		329.12	0	459.9	0	0	0	329.12	0	459.9	0	0	0	1.00:0:1.40:0:0:0	394.51	0	394.51	0	#DIV/0!	1.00:0	20434
2107	27667	| diphosphoinositol polyphosphate phosphohydrolase 2 isoform beta | 11163 | NUDT4 | 181 | Q9NZJ9 | sp	NP_950241	32.94	8	1	1		329.12	0	459.9	0	0	0	329.12	0	459.9	0	0	0	1.00:0:1.40:0:0:0	394.51	0	394.51	0	#DIV/0!	1.00:0	20434
955	5476	| UTP--glucose-1-phosphate uridylyltransferase isoform b | 7360 | UGP2 | 497 | Q16851 | sp	NP_001001521	32.93	3	1	1	Acetylation (Protein N-term)	417.37	0	567.29	0	0	0	417.37	0	567.29	0	0	0	1.00:0:1.36:0:0:0	492.33	0	492.33	0	#DIV/0!	1.00:0	55677
955	5477	| UTP--glucose-1-phosphate uridylyltransferase isoform X1 | 7360 | UGP2 | 497 | Q16851 | sp	XP_005264595	32.93	3	1	1	Acetylation (Protein N-term)	417.37	0	567.29	0	0	0	417.37	0	567.29	0	0	0	1.00:0:1.36:0:0:0	492.33	0	492.33	0	#DIV/0!	1.00:0	55677
955	5478	| UTP--glucose-1-phosphate uridylyltransferase isoform X1 | 7360 | UGP2 | 497 | nan | nan	XP_024308888	32.93	3	1	1	Acetylation (Protein N-term)	417.37	0	567.29	0	0	0	417.37	0	567.29	0	0	0	1.00:0:1.36:0:0:0	492.33	0	492.33	0	#DIV/0!	1.00:0	55677
955	5479	| UTP--glucose-1-phosphate uridylyltransferase isoform X1 | 7360 | UGP2 | 497 | Q16851 | sp	XP_005264594	32.93	3	1	1	Acetylation (Protein N-term)	417.37	0	567.29	0	0	0	417.37	0	567.29	0	0	0	1.00:0:1.36:0:0:0	492.33	0	492.33	0	#DIV/0!	1.00:0	55677
574	2352	| FAST kinase domain-containing protein 4 isoform 1 | 9238 | TBRG4 | 631 | Q969Z0 | sp	NP_004740	32.91	18	7	7	Carbamidomethylation	2530.1	2961.7	3924.1	0	0	0	1579.1	1709.3	2246	0	0	0	1.00:1.08:1.42:0:0:0	3485.5	0	1844.8	0	#DIV/0!	1.00:0	70738
574	2353	| FAST kinase domain-containing protein 4 isoform 3 | 9238 | TBRG4 | 642 | B3KRS4 | tr	NP_001248763	32.91	18	7	7	Carbamidomethylation	2530.1	2961.7	3924.1	0	0	0	1579.1	1709.3	2246	0	0	0	1.00:1.08:1.42:0:0:0	3485.5	0	1844.8	0	#DIV/0!	1.00:0	71857
2214	14982	| golgin subfamily B member 1 isoform X12 | 2804 | GOLGB1 | 3016 | nan | nan	XP_016861684	32.9	0	1	1		449.68	0	321.59	0	0	0	449.68	0	321.59	0	0	0	1.00:0:0.72:0:0:0	385.64	0	385.64	0	#DIV/0!	1.00:0	348134
2214	14983	| golgin subfamily B member 1 isoform 4 | 2804 | GOLGB1 | 3184 | Q14789 | sp	NP_001243417	32.9	0	1	1		449.68	0	321.59	0	0	0	449.68	0	321.59	0	0	0	1.00:0:0.72:0:0:0	385.64	0	385.64	0	#DIV/0!	1.00:0	367423
2214	14984	| golgin subfamily B member 1 isoform X11 | 2804 | GOLGB1 | 3189 | nan | nan	XP_006713654	32.9	0	1	1		449.68	0	321.59	0	0	0	449.68	0	321.59	0	0	0	1.00:0:0.72:0:0:0	385.64	0	385.64	0	#DIV/0!	1.00:0	367807
2214	14985	| golgin subfamily B member 1 isoform X10 | 2804 | GOLGB1 | 3189 | nan | nan	XP_016861683	32.9	0	1	1		449.68	0	321.59	0	0	0	449.68	0	321.59	0	0	0	1.00:0:0.72:0:0:0	385.64	0	385.64	0	#DIV/0!	1.00:0	367995
2214	14986	| golgin subfamily B member 1 isoform X9 | 2804 | GOLGB1 | 3223 | nan | nan	XP_006713653	32.9	0	1	1		449.68	0	321.59	0	0	0	449.68	0	321.59	0	0	0	1.00:0:0.72:0:0:0	385.64	0	385.64	0	#DIV/0!	1.00:0	371725
2214	14987	| golgin subfamily B member 1 isoform X8 | 2804 | GOLGB1 | 3224 | nan | nan	XP_016861682	32.9	0	1	1		449.68	0	321.59	0	0	0	449.68	0	321.59	0	0	0	1.00:0:0.72:0:0:0	385.64	0	385.64	0	#DIV/0!	1.00:0	372161
2214	14988	| golgin subfamily B member 1 isoform X7 | 2804 | GOLGB1 | 3225 | nan | nan	XP_016861681	32.9	0	1	1		449.68	0	321.59	0	0	0	449.68	0	321.59	0	0	0	1.00:0:0.72:0:0:0	385.64	0	385.64	0	#DIV/0!	1.00:0	372289
2214	14989	| golgin subfamily B member 1 isoform 3 | 2804 | GOLGB1 | 3225 | Q14789 | sp	NP_001243416	32.9	0	1	1		449.68	0	321.59	0	0	0	449.68	0	321.59	0	0	0	1.00:0:0.72:0:0:0	385.64	0	385.64	0	#DIV/0!	1.00:0	372264
2214	14990	| golgin subfamily B member 1 isoform X6 | 2804 | GOLGB1 | 3228 | nan | nan	XP_016861680	32.9	0	1	1		449.68	0	321.59	0	0	0	449.68	0	321.59	0	0	0	1.00:0:0.72:0:0:0	385.64	0	385.64	0	#DIV/0!	1.00:0	372296
2214	14991	| golgin subfamily B member 1 isoform X6 | 2804 | GOLGB1 | 3228 | nan | nan	XP_005247430	32.9	0	1	1		449.68	0	321.59	0	0	0	449.68	0	321.59	0	0	0	1.00:0:0.72:0:0:0	385.64	0	385.64	0	#DIV/0!	1.00:0	372296
2214	14992	| golgin subfamily B member 1 isoform X5 | 2804 | GOLGB1 | 3230 | nan | nan	XP_005247429	32.9	0	1	1		449.68	0	321.59	0	0	0	449.68	0	321.59	0	0	0	1.00:0:0.72:0:0:0	385.64	0	385.64	0	#DIV/0!	1.00:0	372836
[truncated: 6,215 more rows]

## Sheet: FoundMin2RepsFor2AzMan
Protein Group	Protein ID	Description	Accession	Significance	Coverage (%)	#Peptides	#Unique	PTM	2AzMan A Sample 1 Intensity	2AzMan B Sample 2 Intensity	2AzMan C Sample 3 Intensity	Null A Sample 4 Intensity	Null B Sample 5 Intensity	Null C Sample 6 Intensity	2AzMan A Sample 1 Intensity (top-3 peptides)	2AzMan B Sample 2 Intensity (top-3 peptides)	2AzMan C Sample 3 Intensity (top-3 peptides)	Null A Sample 4 Intensity (top-3 peptides)	Null B Sample 5 Intensity (top-3 peptides)	Null C Sample 6 Intensity (top-3 peptides)	Sample Profile (Ratio)	2AzMan Intensity	null Intensity	2AzMan Intensity (top-3 peptides)	null Intensity (top-3 peptides)	TOP 3 RATIO	Group Profile (Ratio)	Avg. Mass
[truncated: 7,492 more rows]

[truncated: 2 more sheets: FoundMin2RepsFor2AzMan_DupRem, Volcano Plot Data]
