# Supplementary material for: O-Acetylated Chemical Reporters of Glycosylation Can Display Metabolism-Dependent Background Labeling of Proteins but Are Generally Reliable Tools for the Identification of Glycoproteins
Source: Front Chem. 2020 Apr 28;8:318. doi: 10.3389/fchem.2020.00318 (PMC7198827; doi:10.3389/fchem.2020.00318)
Supplement: Supplementary file 2 [file Table_2.XLSX]

## Sheet: Summary
	Ac42AzMan	Ac42AzMan
Count of Annotated Sequence	Column Labels
Row Labels	190923L_SAM6048_BY19_CF_3.raw	190923L_SAM6048_BY19_CF_4.raw	Grand Total
[K].AGQcVIGLQMGTNK.[C]	1	4	5
[K].AINcATSGVVGLVNcLR.[R]	2		2
[K].AmSYKPICPTcQTSYGIQK.[G]		1	1
[K].APPPSLTDcIGTVDSR.[A]	2	1	3
[K].AVQDLcGWR.[I]	2	4	6
[K].ETTNIFSNcGcVR.[A]	1	2	3
[K].FINYVKNcFR.[M]	2	2	4
[K].HELQANcYEEVKDRcTLAEK.[L]	2	1	3
[K].HFLSDTGMAcR.[S]	4	2	6
[K].NcGcLGASPNLEQLQEENLK.[L]	3	3	6
[K].NSNVDSSYLESLYQScPR.[G]	2		2
[K].NVEcAR.[V]	8	5	13
[K].SGIQPLcPER.[S]	2	2	4
[K].SSGcDVNLPGVNVK.[L]	1	1	2
[K].STAcQMLVcYAK.[E]	4		4
[K].STLTDSLVcK.[A]	8	9	17
[K].STTTSDPPNIcK.[V]	2	1	3
[K].TVcDAAEK.[G]	2	2	4
[K].TVGVQGDcR.[S]	1	1	2
[K].VAcAEEWQESR.[T]	2	4	6
[K].VVNEINIEDLcLTK.[A]	1		1
[M].AcARPLISVYSEK.[G]	2	1	3
[M].AcGLVASNLNLKPGEcLR.[V]	5	3	8
[R].EVGGGHGcTSPPFPQEAR.[A]	2		2
[R].FcEMccDcR.[M]	1	1	2
[R].IFGSIPMQAcQQK.[D]		1	1
[R].INISEGNcPER.[I]	6	7	13
[R].LQGINcGPDFTPSFANLGR.[T]	1	2	3
[R].LVVPATQcGSLIGK.[G]	2	1	3
[R].LYYFQYPcYQEGLR.[S]	2		2
[R].NLFIScK.[S]	2		2
[R].QVQSLTcEVDALK.[G]	2	2	4
[R].SILSPGGScGPIK.[V]		1	1
Grand Total	77	64	141

## Sheet: Raw Data
Checked	Confidence	Identifying Node	PSM Ambiguity	Annotated Sequence	Modifications	# Proteins	Master Protein Accessions	Master Protein Descriptions	Protein Accessions	# Missed Cleavages	Charge	DeltaScore	DeltaCn	Rank	Search Engine Rank	m/z [Da]	MH+ [Da]	Theo. MH+ [Da]	DeltaM [ppm]	Deltam/z [Da]	Activation Type	MS Order	Isolation Interference [%]	Ion Inject Time [ms]	RT [min]	First Scan	Spectrum File	File ID	XCorr	|Log Prob|	Byonic Score	Delta Byonic Score	Delta Mod Score	PEP 2D	q-Value 2D	FDR 2D	Peptide Group FDR 2D	PEP 1D	q-Value 1D	FDR 1D	Peptide Group FDR 1D	Off by X	Position in Protein	# Protein Groups
TRUE	High	Sequest HT (A23)	Unambiguous	[K].AGQcVIGLQMGTNK.[C]	C4(HexAz2Si)	1	Q99439	Calponin-2 OS=Homo sapiens OX=9606 GN=CNN2 PE=1 SV=4	Q99439	0	2	0.5615	0	1	1	854.92	1708.83	1708.83	0.51	0.00044	HCD (High Energy Collision Dissociation)	MS2	70.875	100	65.6617	18110	190923L_SAM6048_BY19_CF_4.raw	F140	2.6													0	0	1
TRUE	High	PMI-Byonic (B7)	Unambiguous	[K].AGQcVIGLQMGTNK.[C]	C4(HexAz2Si)	1	Q99439	Calponin-2 OS=Homo sapiens OX=9606 GN=CNN2 PE=1 SV=4	Q99439	0	2	1	0	1	1	854.922	1708.84	1708.83	2.32	0.00199	HCD (High Energy Collision Dissociation)	MS2	28.1979	100	60.0526	15324	190923L_SAM6048_BY19_CF_3.raw	F141		1.99	133.4	64.5	64.5	0.0102748	0.00227301	0.00227101	0	0.379583	0.0272673	0.027231	0.000954198	0	161	1
TRUE	High	PMI-Byonic (B7)	Unambiguous	[K].AGQcVIGLQMGTNK.[C]	C4(HexAz2Si)	1	Q99439	Calponin-2 OS=Homo sapiens OX=9606 GN=CNN2 PE=1 SV=4	Q99439	0	2	1	0	1	1	854.92	1708.83	1708.83	0.51	0.00044	HCD (High Energy Collision Dissociation)	MS2	70.875	100	65.6617	18110	190923L_SAM6048_BY19_CF_4.raw	F140		6.82	323.8	266.3	54.8	1.49742e-07	2.25861e-08	0	0	8.64983e-06	0.000718133	0.000672269	0.000954198	0	161	1
TRUE	High	Sequest HT (A23)	Unambiguous	[K].AGQcVIGLQMGTNK.[C]	C4(HexAz2Si)	1	Q99439	Calponin-2 OS=Homo sapiens OX=9606 GN=CNN2 PE=1 SV=4	Q99439	0	2	0.6462	0	1	1	854.918	1708.83	1708.83	-1.78	-0.00152	HCD (High Energy Collision Dissociation)	MS2	81.91	100	65.9925	18297	190923L_SAM6048_BY19_CF_4.raw	F140	2.6													0	0	1
TRUE	High	PMI-Byonic (B7)	Unambiguous	[K].AGQcVIGLQMGTNK.[C]	C4(HexAz2Si)	1	Q99439	Calponin-2 OS=Homo sapiens OX=9606 GN=CNN2 PE=1 SV=4	Q99439	0	2	1	0	1	1	854.918	1708.83	1708.83	-1.78	-0.00152	HCD (High Energy Collision Dissociation)	MS2	81.91	100	65.9925	18297	190923L_SAM6048_BY19_CF_4.raw	F140		6.91	335.4	292.2	66.9	1.22626e-07	1.79132e-08	0	0	7.08345e-06	0.000718133	0.000701262	0.000954198	0	161	1
TRUE	High	PMI-Byonic (B7)	Unambiguous	[K].AmSYKPICPTcQTSYGIQK.[G]	M2(Oxidation); C11(HexAz0Si)	1	Q8TDB6	E3 ubiquitin-protein ligase DTX3L OS=Homo sapiens OX=9606 GN=DTX3L PE=1 SV=1	Q8TDB6	0	3	1	0	1	1	808.041	2422.11	2422.11	0.09	8e-05	HCD (High Energy Collision Dissociation)	MS2	58.5397	100	68.7423	19848	190923L_SAM6048_BY19_CF_4.raw	F140		2.14	246	157.1	0.1	0.00721061	0.00193723	0.00193025	0.00235073	0.00955836	0.00134849	0.00132777	0.0021692	0	589	1
TRUE	High	Sequest HT (A23)	Unambiguous	[K].APPPSLTDcIGTVDSR.[A]	C9(HexAz2Si)	1	Q9NZZ3	Charged multivesicular body protein 5 OS=Homo sapiens OX=9606 GN=CHMP5 PE=1 SV=1	Q9NZZ3	0	2	0.097	0	1	1	959.466	1917.92	1917.92	2.46	0.00236	HCD (High Energy Collision Dissociation)	MS2	22.0017	100	62.527	16673	190923L_SAM6048_BY19_CF_3.raw	F141	2.37													0	0	1
TRUE	High	PMI-Byonic (B7)	Unambiguous	[K].APPPSLTDcIGTVDSR.[A]	C9(HexAz2Si)	1	Q9NZZ3	Charged multivesicular body protein 5 OS=Homo sapiens OX=9606 GN=CHMP5 PE=1 SV=1	Q9NZZ3	0	2	1	0	1	1	959.466	1917.92	1917.92	2.46	0.00236	HCD (High Energy Collision Dissociation)	MS2	22.0017	100	62.527	16673	190923L_SAM6048_BY19_CF_3.raw	F141		7.48	397.9	366.3	137.8	3.34837e-08	4.1416e-09	0	0	1.93419e-06	2.45815e-07	0	0	0	12	1
TRUE	High	PMI-Byonic (B7)	Unambiguous	[K].APPPSLTDcIGTVDSR.[A]	C9(HexAz2Si)	1	Q9NZZ3	Charged multivesicular body protein 5 OS=Homo sapiens OX=9606 GN=CHMP5 PE=1 SV=1	Q9NZZ3	0	2	1	0	1	1	959.461	1917.92	1917.92	-2.11	-0.00202	HCD (High Energy Collision Dissociation)	MS2	15.0704	100	67.631	19229	190923L_SAM6048_BY19_CF_4.raw	F140		4.93	254.6	191.8	100	1.17025e-05	0.000468165	0.000359131	0	0.000675547	0.000915751	0.000859845	0	0	12	1
TRUE	High	Sequest HT (A23)	Unambiguous	[K].AVQDLcGWR.[I]	C6(HexAz2Si)	1	Q9P258	Protein RCC2 OS=Homo sapiens OX=9606 GN=RCC2 PE=1 SV=2	Q9P258	0	2	0.4211	0	1	1	668.819	1336.63	1336.63	1.54	0.00103	HCD (High Energy Collision Dissociation)	MS2	16.9446	100	63.901	17151	190923L_SAM6048_BY19_CF_4.raw	F140	2.09													0	0	1
TRUE	High	Sequest HT (A23)	Unambiguous	[K].AVQDLcGWR.[I]	C6(HexAz2Si)	1	Q9P258	Protein RCC2 OS=Homo sapiens OX=9606 GN=RCC2 PE=1 SV=2	Q9P258	0	2	0.2539	0	1	1	668.817	1336.63	1336.63	-0.69	-0.00046	HCD (High Energy Collision Dissociation)	MS2	84.3821	100	62.8767	16669	190923L_SAM6048_BY19_CF_4.raw	F140	1.93													0	0	1
TRUE	High	PMI-Byonic (B7)	Unambiguous	[K].AVQDLcGWR.[I]	C6(HexAz2Si)	1	Q9P258	Protein RCC2 OS=Homo sapiens OX=9606 GN=RCC2 PE=1 SV=2	Q9P258	0	2	1	0	1	1	668.819	1336.63	1336.63	1.54	0.00103	HCD (High Energy Collision Dissociation)	MS2	16.9446	100	63.901	17151	190923L_SAM6048_BY19_CF_4.raw	F140		4.62	340.3	119.7	119.7	2.41706e-05	0.000518941	0.00051458	0.000616903	0.000209118	0.000718133	0.000696864	0.000693481	0	423	1
TRUE	High	PMI-Byonic (B7)	Unambiguous	[K].AVQDLcGWR.[I]	C6(HexAz2Si)	1	Q9P258	Protein RCC2 OS=Homo sapiens OX=9606 GN=RCC2 PE=1 SV=2	Q9P258	0	2	1	0	1	1	668.817	1336.63	1336.63	-0.69	-0.00046	HCD (High Energy Collision Dissociation)	MS2	84.3821	100	62.8767	16669	190923L_SAM6048_BY19_CF_4.raw	F140		2.16	283.3	70.9	70.9	0.0069316	0.00193723	0.00193299	0.000616903	0.0594717	0.00419801	0.00419068	0.000693481	0	423	1
TRUE	High	Sequest HT (A23)	Unambiguous	[K].AVQDLcGWR.[I]	C6(HexAz2Si)	1	Q9P258	Protein RCC2 OS=Homo sapiens OX=9606 GN=RCC2 PE=1 SV=2	Q9P258	0	2	0.2969	0	1	1	668.818	1336.63	1336.63	0.37	0.00025	HCD (High Energy Collision Dissociation)	MS2	64.3834	100	58.7929	14656	190923L_SAM6048_BY19_CF_3.raw	F141	2.29													0	0	1
TRUE	High	PMI-Byonic (B7)	Unambiguous	[K].AVQDLcGWR.[I]	C6(HexAz2Si)	1	Q9P258	Protein RCC2 OS=Homo sapiens OX=9606 GN=RCC2 PE=1 SV=2	Q9P258	0	2	1	0	1	1	668.818	1336.63	1336.63	0.37	0.00025	HCD (High Energy Collision Dissociation)	MS2	64.3834	100	58.7929	14656	190923L_SAM6048_BY19_CF_3.raw	F141		4.83	339.9	124.6	124.6	1.48264e-05	0.000468165	0.000353732	0.000616903	0.000128276	0.000718133	0.000482276	0.000693481	0	423	1
TRUE	High	PMI-Byonic (B7)	Unambiguous	[K].ETTNIFSNcGcVR.[A]	C9(Carbamidomethyl); C11(HexAz2Si)	1	Q9UBB4	Ataxin-10 OS=Homo sapiens OX=9606 GN=ATXN10 PE=1 SV=1	Q9UBB4	0	2	1	0	1	1	895.394	1789.78	1789.78	-0.47	-0.00042	HCD (High Energy Collision Dissociation)	MS2	19.631	100	63.9457	17171	190923L_SAM6048_BY19_CF_4.raw	F140		5.78	287.6	254.9	19	1.67611e-06	0.000468165	0.000425985	0.000728863	1.45016e-05	0.000718133	0.000620155	0.000860585	0	346	1
TRUE	High	PMI-Byonic (B7)	Unambiguous	[K].ETTNIFSNcGcVR.[A]	C9(Carbamidomethyl); C11(HexAz2Si)	1	Q9UBB4	Ataxin-10 OS=Homo sapiens OX=9606 GN=ATXN10 PE=1 SV=1	Q9UBB4	0	2	1	0	1	1	895.395	1789.78	1789.78	1.24	0.00111	HCD (High Energy Collision Dissociation)	MS2	33.5823	100	58.5934	14548	190923L_SAM6048_BY19_CF_3.raw	F141		2.62	209.1	184.1	1	0.00237377	0.00123406	0.0012322	0.00199203	0.0204736	0.00220548	0.00220224	0.0036784	0	346	1
TRUE	High	Sequest HT (A23)	Unambiguous	[K].ETTNIFSNcGcVR.[A]	C9(Carbamidomethyl); C11(HexAz2Si)	1	Q9UBB4	Ataxin-10 OS=Homo sapiens OX=9606 GN=ATXN10 PE=1 SV=1	Q9UBB4	0	2	0.1454	0	1	1	895.394	1789.78	1789.78	-0.47	-0.00042	HCD (High Energy Collision Dissociation)	MS2	19.631	100	63.9457	17171	190923L_SAM6048_BY19_CF_4.raw	F140	2.27													0	0	1
TRUE	High	PMI-Byonic (B7)	Unambiguous	[K].HELQANcYEEVKDRcTLAEK.[L]	C7(Carbamidomethyl); C15(HexAz2Si)	1	P23528	Cofilin-1 OS=Homo sapiens OX=9606 GN=CFL1 PE=1 SV=3	P23528	2	4	1	0	1	1	682.069	2725.26	2725.25	0.99	0.00068	HCD (High Energy Collision Dissociation)	MS2	83.2279	100	50.4052	10529	190923L_SAM6048_BY19_CF_3.raw	F141		8.02	534.9	461.9	172.7	9.47578e-09	1.38844e-09	0	0	5.4737e-07	7.97565e-08	0	0	0	133	1
TRUE	High	PMI-Byonic (B7)	Unambiguous	[K].HELQANcYEEVKDRcTLAEK.[L]	C7(Carbamidomethyl); C15(HexAz2Si)	1	P23528	Cofilin-1 OS=Homo sapiens OX=9606 GN=CFL1 PE=1 SV=3	P23528	2	4	1	0	1	1	682.069	2725.25	2725.25	-0.11	-8e-05	HCD (High Energy Collision Dissociation)	MS2	45.8284	100	52.5456	11418	190923L_SAM6048_BY19_CF_4.raw	F140		7.88	550.5	493.4	235.1	1.3334e-08	1.78634e-09	0	0	7.7024e-07	1.01727e-07	0	0	0	133	1
TRUE	High	PMI-Byonic (B7)	Unambiguous	[K].HELQANcYEEVKDRcTLAEK.[L]	C7(Carbamidomethyl); C15(HexAz2Si)	1	P23528	Cofilin-1 OS=Homo sapiens OX=9606 GN=CFL1 PE=1 SV=3	P23528	2	3	1	0	1	1	909.089	2725.25	2725.25	0.44	0.0004	HCD (High Energy Collision Dissociation)	MS2	69.3871	100	50.424	10537	190923L_SAM6048_BY19_CF_3.raw	F141		2.97	309.4	190.7	3.9	0.0010802	0.000765345	0.00071449	0	0.0587724	0.00419801	0.0041936	0	0	133	1
TRUE	High	Sequest HT (A23)	Unambiguous	[K].HFLSDTGMAcR.[S]	C10(HexAz2Si)	1	Q5TFE4	5'-nucleotidase domain-containing protein 1 OS=Homo sapiens OX=9606 GN=NT5DC1 PE=1 SV=1	Q5TFE4	0	2	0.137	0	1	1	763.839	1526.67	1526.67	0.38	0.00029	HCD (High Energy Collision Dissociation)	MS2	12.9782	100	50.827	10734	190923L_SAM6048_BY19_CF_3.raw	F141	2.7													0	0	1
TRUE	High	Sequest HT (A23)	Unambiguous	[K].HFLSDTGMAcR.[S]	C10(HexAz2Si)	1	Q5TFE4	5'-nucleotidase domain-containing protein 1 OS=Homo sapiens OX=9606 GN=NT5DC1 PE=1 SV=1	Q5TFE4	0	2	0.0917	0	1	1	763.838	1526.67	1526.67	-0.01	0	HCD (High Energy Collision Dissociation)	MS2	38.0384	100	49.8155	10230	190923L_SAM6048_BY19_CF_3.raw	F141	2.29													0	0	1
TRUE	High	PMI-Byonic (B7)	Unambiguous	[K].HFLSDTGMAcR.[S]	C10(HexAz2Si)	1	Q5TFE4	5'-nucleotidase domain-containing protein 1 OS=Homo sapiens OX=9606 GN=NT5DC1 PE=1 SV=1	Q5TFE4	0	2	1	0	1	1	763.838	1526.67	1526.67	-0.01	0	HCD (High Energy Collision Dissociation)	MS2	38.0384	100	49.8155	10230	190923L_SAM6048_BY19_CF_3.raw	F141		5.23	400.9	276.8	145.3	5.85971e-06	0.000468165	0.000381025	0.00074129	5.06978e-05	0.000718133	0.000529801	0.000880282	0	110	1
TRUE	High	Sequest HT (A23)	Unambiguous	[K].HFLSDTGMAcR.[S]	C10(HexAz2Si)	1	Q5TFE4	5'-nucleotidase domain-containing protein 1 OS=Homo sapiens OX=9606 GN=NT5DC1 PE=1 SV=1	Q5TFE4	0	2	0.0619	0	1	1	763.842	1526.68	1526.67	4.3	0.00329	HCD (High Energy Collision Dissociation)	MS2	66.3126	100	53.8668	11986	190923L_SAM6048_BY19_CF_4.raw	F140	2.26													0	0	1
TRUE	High	PMI-Byonic (B7)	Unambiguous	[K].HFLSDTGMAcR.[S]	C10(HexAz2Si)	1	Q5TFE4	5'-nucleotidase domain-containing protein 1 OS=Homo sapiens OX=9606 GN=NT5DC1 PE=1 SV=1	Q5TFE4	0	2	1	0	1	1	763.842	1526.68	1526.67	4.3	0.00329	HCD (High Energy Collision Dissociation)	MS2	66.3126	100	53.8668	11986	190923L_SAM6048_BY19_CF_4.raw	F140		4.49	421.9	268.7	153.1	3.20965e-05	0.000678541	0.000675333	0.00074129	0.000277688	0.000915751	0.000911577	0.000880282	0	110	1
TRUE	High	PMI-Byonic (B7)	Unambiguous	[K].HFLSDTGMAcR.[S]	C10(HexAz2Si)	1	Q5TFE4	5'-nucleotidase domain-containing protein 1 OS=Homo sapiens OX=9606 GN=NT5DC1 PE=1 SV=1	Q5TFE4	0	2	1	0	1	1	763.839	1526.67	1526.67	0.38	0.00029	HCD (High Energy Collision Dissociation)	MS2	12.9782	100	50.827	10734	190923L_SAM6048_BY19_CF_3.raw	F141		5.85	531.8	347.1	165.3	1.4057e-06	0.000468165	0.000433463	0.00074129	1.21621e-05	0.000718133	0.000636943	0.000880282	0	110	1
TRUE	High	Sequest HT (A23)	Unambiguous	[K].NcGcLGASPNLEQLQEENLK.[L]	C2(Carbamidomethyl); C4(HexAz2Si)	1	P54136	Arginine--tRNA ligase, cytoplasmic OS=Homo sapiens OX=9606 GN=RARS PE=1 SV=2	P54136	0	2	0.1257	0	1	1	1253.58	2506.16	2506.15	2.88	0.0036	HCD (High Energy Collision Dissociation)	MS2	10.6137	100	71.2359	21510	190923L_SAM6048_BY19_CF_3.raw	F141	3.34													0	0	1
TRUE	High	PMI-Byonic (B7)	Unambiguous	[K].NcGcLGASPNLEQLQEENLK.[L]	C2(Carbamidomethyl); C4(HexAz2Si)	1	P54136	Arginine--tRNA ligase, cytoplasmic OS=Homo sapiens OX=9606 GN=RARS PE=1 SV=2	P54136	0	2	1	0	1	1	1253.58	2506.15	2506.15	0.48	0.00061	HCD (High Energy Collision Dissociation)	MS2	0	100	76.1159	24100	190923L_SAM6048_BY19_CF_4.raw	F140		9	488.6	484.9	37.9	1.00428e-09	1.08146e-10	0	0	5.80123e-08	6.64264e-09	0	0	0	31	1
TRUE	High	Sequest HT (A23)	Unambiguous	[K].NcGcLGASPNLEQLQEENLK.[L]	C2(Carbamidomethyl); C4(HexAz2Si)	1	P54136	Arginine--tRNA ligase, cytoplasmic OS=Homo sapiens OX=9606 GN=RARS PE=1 SV=2	P54136	0	2	0.0725	0	1	1	1253.58	2506.15	2506.15	0.48	0.00061	HCD (High Energy Collision Dissociation)	MS2	0	100	76.1159	24100	190923L_SAM6048_BY19_CF_4.raw	F140	3.45													0	0	1
TRUE	High	PMI-Byonic (B7)	Unambiguous	[K].NcGcLGASPNLEQLQEENLK.[L]	C2(Carbamidomethyl); C4(HexAz2Si)	1	P54136	Arginine--tRNA ligase, cytoplasmic OS=Homo sapiens OX=9606 GN=RARS PE=1 SV=2	P54136	0	3	1	0	1	1	836.059	2506.16	2506.15	4.29	0.00358	HCD (High Energy Collision Dissociation)	MS2	76.1498	100	70.4561	21074	190923L_SAM6048_BY19_CF_3.raw	F141		5.54	393.6	377.8	26.4	2.8657e-06	0.000468165	0.000403714	0	0.000165511	0.000718133	0.000471698	0	0	31	1
TRUE	High	PMI-Byonic (B7)	Unambiguous	[K].NcGcLGASPNLEQLQEENLK.[L]	C2(Carbamidomethyl); C4(HexAz2Si)	1	P54136	Arginine--tRNA ligase, cytoplasmic OS=Homo sapiens OX=9606 GN=RARS PE=1 SV=2	P54136	0	2	1	0	1	1	1253.58	2506.16	2506.15	2.88	0.0036	HCD (High Energy Collision Dissociation)	MS2	10.6137	100	71.2359	21510	190923L_SAM6048_BY19_CF_3.raw	F141		9.45	470.5	470.5	67	3.56494e-10	5.62679e-11	0	0	2.0593e-08	3.40418e-09	0	0	0	31	1
TRUE	High	PMI-Byonic (B7)	Unambiguous	[K].NcGcLGASPNLEQLQEENLK.[L]	C2(Carbamidomethyl); C4(HexAz2Si)	1	P54136	Arginine--tRNA ligase, cytoplasmic OS=Homo sapiens OX=9606 GN=RARS PE=1 SV=2	P54136	0	3	1	0	1	1	836.057	2506.16	2506.15	2.02	0.00169	HCD (High Energy Collision Dissociation)	MS2	62.9932	100	75.3877	23660	190923L_SAM6048_BY19_CF_4.raw	F140		5.33	315.9	293.6	0	4.68784e-06	0.000468165	0.000387973	0	0.000270722	0.000915751	0.000913242	0	0	31	1
TRUE	High	Sequest HT (A23)	Unambiguous	[K].NSNVDSSYLESLYQScPR.[G]	C16(HexAz2Si)	1	Q7Z2W4	Zinc finger CCCH-type antiviral protein 1 OS=Homo sapiens OX=9606 GN=ZC3HAV1 PE=1 SV=3	Q7Z2W4	0	2	0.0706	0	1	1	1176.03	2351.04	2351.04	0.45	0.00053	HCD (High Energy Collision Dissociation)	MS2	16.4673	100	73.6778	22924	190923L_SAM6048_BY19_CF_3.raw	F141	3.26													0	0	1
TRUE	High	PMI-Byonic (B7)	Unambiguous	[K].NSNVDSSYLESLYQScPR.[G]	C16(HexAz2Si)	1	Q7Z2W4	Zinc finger CCCH-type antiviral protein 1 OS=Homo sapiens OX=9606 GN=ZC3HAV1 PE=1 SV=3	Q7Z2W4	0	2	1	0	1	1	1176.03	2351.04	2351.04	0.45	0.00053	HCD (High Energy Collision Dissociation)	MS2	16.4673	100	73.6778	22924	190923L_SAM6048_BY19_CF_3.raw	F141		10.04	539.8	493	168.4	9.12266e-11	1.18506e-11	0	0	5.26972e-09	6.51547e-10	0	0	0	630	1
TRUE	High	PMI-Byonic (B7)	Unambiguous	[K].NVEcAR.[V]	C4(HexAz2Si)	1	Q9HD42	Charged multivesicular body protein 1a OS=Homo sapiens OX=9606 GN=CHMP1A PE=1 SV=1	Q9HD42	0	2	1	0	1	1	490.724	980.441	980.443	-2.87	-0.00141	HCD (High Energy Collision Dissociation)	MS2	48.6797	100	31.7935	2559	190923L_SAM6048_BY19_CF_4.raw	F140		1.37	217.5	90.5	68.7	0.0431355	0.00404184	0.00403944	0.00101061	0.34997	0.0246269	0.0246232	0.00267237	0	41	1
TRUE	High	PMI-Byonic (B7)	Unambiguous	[K].NVEcAR.[V]	C4(HexAz2Si)	1	Q9HD42	Charged multivesicular body protein 1a OS=Homo sapiens OX=9606 GN=CHMP1A PE=1 SV=1	Q9HD42	0	2	1	0	1	1	490.724	980.441	980.443	-2.29	-0.00112	HCD (High Energy Collision Dissociation)	MS2	56.2115	100	29.143	2131	190923L_SAM6048_BY19_CF_3.raw	F141		1.33	162.3	65.7	65.7	0.047118	0.00426945	0.00426793	0.00101061	0.378954	0.0272673	0.0272512	0.00267237	0	41	1
TRUE	High	PMI-Byonic (B7)	Unambiguous	[K].NVEcAR.[V]	C4(HexAz2Si)	1	Q9HD42	Charged multivesicular body protein 1a OS=Homo sapiens OX=9606 GN=CHMP1A PE=1 SV=1	Q9HD42	0	2	1	0	1	1	490.723	980.439	980.443	-4.58	-0.00225	HCD (High Energy Collision Dissociation)	MS2	39.9853	100	30.1478	2307	190923L_SAM6048_BY19_CF_3.raw	F141		2.84	239.2	125.3	94.3	0.00144787	0.000851305	0.000840454	0.00101061	0.0125023	0.00150659	0.00149841	0.00267237	0	41	1
TRUE	High	PMI-Byonic (B7)	Unambiguous	[K].SGIQPLcPER.[S]	C7(HexAz2Si)	1	P42166	Lamina-associated polypeptide 2, isoform alpha OS=Homo sapiens OX=9606 GN=TMPO PE=1 SV=2	P42166	0	2	1	0	1	1	694.846	1388.68	1388.68	3	0.00208	HCD (High Energy Collision Dissociation)	MS2	50.1997	100	55.4242	12748	190923L_SAM6048_BY19_CF_4.raw	F140		6.1	378.5	186.3	186.3	7.88415e-07	0.000468165	0.000463499	0.000823723	4.55409e-05	0.000718133	0.000535045	0.000810373	0	335	1
TRUE	High	Sequest HT (A23)	Unambiguous	[K].SGIQPLcPER.[S]	C7(HexAz2Si)	1	P42166	Lamina-associated polypeptide 2, isoform alpha OS=Homo sapiens OX=9606 GN=TMPO PE=1 SV=2	P42166	0	2	0.4874	0	1	1	694.843	1388.68	1388.68	-1.47	-0.00102	HCD (High Energy Collision Dissociation)	MS2	73.0845	100	50.8323	10737	190923L_SAM6048_BY19_CF_3.raw	F141	1.99													0	0	1
TRUE	High	Sequest HT (A23)	Unambiguous	[K].SGIQPLcPER.[S]	C7(HexAz2Si)	1	P42166	Lamina-associated polypeptide 2, isoform alpha OS=Homo sapiens OX=9606 GN=TMPO PE=1 SV=2	P42166	0	2	0.4174	0	1	1	694.846	1388.68	1388.68	3	0.00208	HCD (High Energy Collision Dissociation)	MS2	50.1997	100	55.4242	12748	190923L_SAM6048_BY19_CF_4.raw	F140	2.3													0	0	1
TRUE	High	PMI-Byonic (B7)	Unambiguous	[K].SGIQPLcPER.[S]	C7(HexAz2Si)	1	P42166	Lamina-associated polypeptide 2, isoform alpha OS=Homo sapiens OX=9606 GN=TMPO PE=1 SV=2	P42166	0	2	1	0	1	1	694.843	1388.68	1388.68	-1.47	-0.00102	HCD (High Energy Collision Dissociation)	MS2	73.0845	100	50.8323	10737	190923L_SAM6048_BY19_CF_3.raw	F141		6.38	344.8	134.1	134.1	4.21433e-07	0.000265534	0.000249875	0.000823723	2.43436e-05	0.000718133	0.000578871	0.000810373	0	335	1
TRUE	High	PMI-Byonic (B7)	Unambiguous	[K].SSGcDVNLPGVNVK.[L]	C4(HexAz2Si)	1	Q09666	Neuroblast differentiation-associated protein AHNAK OS=Homo sapiens OX=9606 GN=AHNAK PE=1 SV=2	Q09666	0	2	1	0	1	1	839.408	1677.81	1677.81	0.52	0.00044	HCD (High Energy Collision Dissociation)	MS2	55.3788	100	59.9117	15247	190923L_SAM6048_BY19_CF_3.raw	F141		4.25	287	148.6	39.9	5.63286e-05	0.000678541	0.000651042	0.000661813	0.000487323	0.000915751	0.000876232	0.000762776	0	5499	1
TRUE	High	PMI-Byonic (B7)	Unambiguous	[K].SSGcDVNLPGVNVK.[L]	C4(HexAz2Si)	1	Q09666	Neuroblast differentiation-associated protein AHNAK OS=Homo sapiens OX=9606 GN=AHNAK PE=1 SV=2	Q09666	0	2	1	0	1	1	839.407	1677.81	1677.81	-0.63	-0.00053	HCD (High Energy Collision Dissociation)	MS2	58.4484	100	64.7827	17625	190923L_SAM6048_BY19_CF_4.raw	F140		5.28	344.6	225.9	50.3	5.19654e-06	0.000468165	0.000385282	0.000661813	4.49602e-05	0.000718133	0.000535906	0.000762776	0	5499	1
TRUE	High	PMI-Byonic (B7)	Unambiguous	[K].STLTDSLVcK.[A]	C9(HexAz2Si)	1	P13639	Elongation factor 2 OS=Homo sapiens OX=9606 GN=EEF2 PE=1 SV=4	P13639	0	2	1	0	1	1	678.337	1355.67	1355.67	-1.27	-0.00086	HCD (High Energy Collision Dissociation)	MS2	62.6518	100	60.196	15234	190923L_SAM6048_BY19_CF_4.raw	F140		2.79	192.5	125.2	125.2	0.00163006	0.000851305	0.000832178	0	0.0868314	0.00642	0.00638978	0.00116009	0	33	1
TRUE	High	PMI-Byonic (B7)	Unambiguous	[K].STLTDSLVcK.[A]	C9(HexAz2Si)	1	P13639	Elongation factor 2 OS=Homo sapiens OX=9606 GN=EEF2 PE=1 SV=4	P13639	0	2	1	0	1	1	678.339	1355.67	1355.67	1.66	0.00112	HCD (High Energy Collision Dissociation)	MS2	42.7182	100	55.1804	12906	190923L_SAM6048_BY19_CF_3.raw	F141		7.38	478.3	255.2	115.5	4.21348e-08	5.44996e-09	0	0	2.43392e-06	0.000429738	0.000427168	0.00116009	0	33	1
TRUE	High	Sequest HT (A23)	Unambiguous	[K].STLTDSLVcK.[A]	C9(HexAz2Si)	1	P13639	Elongation factor 2 OS=Homo sapiens OX=9606 GN=EEF2 PE=1 SV=4	P13639	0	2	0.2518	0	1	1	678.339	1355.67	1355.67	1.66	0.00112	HCD (High Energy Collision Dissociation)	MS2	42.7182	100	55.1804	12906	190923L_SAM6048_BY19_CF_3.raw	F141	2.74													0	0	1
TRUE	High	PMI-Byonic (B7)	Unambiguous	[K].STTTSDPPNIcK.[V]	C11(HexAz2Si)	1	Q9Y520	Protein PRRC2C OS=Homo sapiens OX=9606 GN=PRRC2C PE=1 SV=4	Q9Y520	0	2	1	0	1	1	776.858	1552.71	1552.71	-2.18	-0.0017	HCD (High Energy Collision Dissociation)	MS2	53.9364	100	45.9949	8086	190923L_SAM6048_BY19_CF_4.raw	F140		2.88	129.5	129.5	45	0.0013231	0.000851305	0.000848656	0.000718391	0.0711944	0.00466563	0.00465919	0.000704225	0	2330	1
TRUE	High	PMI-Byonic (B7)	Unambiguous	[K].STTTSDPPNIcK.[V]	C11(HexAz2Si)	1	Q9Y520	Protein PRRC2C OS=Homo sapiens OX=9606 GN=PRRC2C PE=1 SV=4	Q9Y520	0	2	1	0	1	1	776.861	1552.71	1552.71	1.02	0.00079	HCD (High Energy Collision Dissociation)	MS2	39.2176	100	41.8119	6420	190923L_SAM6048_BY19_CF_3.raw	F141		3.08	136.1	123.6	123.6	0.000825229	0.000765345	0.000723694	0.000718391	0.0454848	0.0033856	0.00336462	0.000704225	0	2330	1
TRUE	High	PMI-Byonic (B7)	Unambiguous	[K].STTTSDPPNIcK.[V]	C11(HexAz2Si)	1	Q9Y520	Protein PRRC2C OS=Homo sapiens OX=9606 GN=PRRC2C PE=1 SV=4	Q9Y520	0	2	1	0	1	1	776.861	1552.71	1552.71	1.36	0.00105	HCD (High Energy Collision Dissociation)	MS2	29.5295	100	42.8574	6947	190923L_SAM6048_BY19_CF_3.raw	F141		5.72	263.5	174.7	100.3	1.9003e-06	0.000468165	0.000420168	0.000718391	0.00010976	0.000718133	0.000489117	0.000704225	0	2330	1
TRUE	High	PMI-Byonic (B7)	Unambiguous	[K].TVcDAAEK.[G]	C3(HexAz2Si)	1	O60664	Perilipin-3 OS=Homo sapiens OX=9606 GN=PLIN3 PE=1 SV=3	O60664	0	2	1	0	1	1	563.256	1125.5	1125.51	-1.52	-0.00085	HCD (High Energy Collision Dissociation)	MS2	46.6561	100	34.9196	3402	190923L_SAM6048_BY19_CF_4.raw	F140		2.61	209.6	84.3	11.4	0.00245637	0.00123406	0.00123085	0.00199005	0.125375	0.00780731	0.00780342	0.013869	0	58	1
TRUE	High	PMI-Byonic (B7)	Unambiguous	[K].TVcDAAEK.[G]	C3(HexAz2Si)	1	O60664	Perilipin-3 OS=Homo sapiens OX=9606 GN=PLIN3 PE=1 SV=3	O60664	0	2	1	0	1	1	563.254	1125.5	1125.51	-5.11	-0.00287	HCD (High Energy Collision Dissociation)	MS2	57.0331	100	32.9514	2909	190923L_SAM6048_BY19_CF_3.raw	F141		3.51	256.9	113	25.7	0.00031034	0.000765345	0.000753125	0.00107875	0.0175725	0.00166976	0.00166451	0.00264971	0	58	1
TRUE	High	PMI-Byonic (B7)	Unambiguous	[K].TVcDAAEK.[G]	C3(HexAz2Si)	1	O60664	Perilipin-3 OS=Homo sapiens OX=9606 GN=PLIN3 PE=1 SV=3	O60664	0	2	1	0	1	1	563.253	1125.5	1125.51	-7.1	-0.004	HCD (High Energy Collision Dissociation)	MS2	65.5039	100	31.9429	2671	190923L_SAM6048_BY19_CF_3.raw	F141		1.53	178.7	73.9	73.9	0.0293001	0.00340136	0.0033796	0.00107875	0.638453	0.052247	0.0522039	0.00264971	0	58	1
TRUE	High	PMI-Byonic (B7)	Unambiguous	[K].TVcDAAEK.[G]	C3(HexAz2Si)	1	O60664	Perilipin-3 OS=Homo sapiens OX=9606 GN=PLIN3 PE=1 SV=3	O60664	0	2	1	0	1	1	563.255	1125.5	1125.51	-3.31	-0.00186	HCD (High Energy Collision Dissociation)	MS2	27.3676	100	33.9124	3070	190923L_SAM6048_BY19_CF_4.raw	F140		1.19	117.8	41.3	41.3	0.0646691	0.00426945	0.00423181	0.00107875	0.801314	0.0753669	0.075357	0.00264971	0	58	1
TRUE	High	PMI-Byonic (B7)	Unambiguous	[K].TVGVQGDcR.[S]	C8(HexAz2Si)	1	P49915	GMP synthase [glutamine-hydrolyzing] OS=Homo sapiens OX=9606 GN=GMPS PE=1 SV=1	P49915	0	2	1	0	1	1	612.284	1223.56	1223.57	-4.63	-0.00283	HCD (High Energy Collision Dissociation)	MS2	32.3662	100	36.384	4010	190923L_SAM6048_BY19_CF_3.raw	F141		1.52	170.1	86.1	86.1	0.0303078	0.00340136	0.00336417	0.00521059	0.251987	0.0163424	0.0163119	0.0257206	0	516	1
TRUE	High	PMI-Byonic (B7)	Unambiguous	[K].TVGVQGDcR.[S]	C8(HexAz2Si)	1	P49915	GMP synthase [glutamine-hydrolyzing] OS=Homo sapiens OX=9606 GN=GMPS PE=1 SV=1	P49915	0	2	1	0	1	1	612.286	1223.56	1223.57	-0.74	-0.00045	HCD (High Energy Collision Dissociation)	MS2	60.8166	100	37.8736	4455	190923L_SAM6048_BY19_CF_4.raw	F140		1.38	141	64.4	64.4	0.0417046	0.00393983	0.0039253	0.00521059	0.339291	0.0216732	0.0216667	0.0257206	0	516	1
TRUE	High	PMI-Byonic (B7)	Unambiguous	[K].VAcAEEWQESR.[T]	C3(HexAz2Si)	1	O75663	TIP41-like protein OS=Homo sapiens OX=9606 GN=TIPRL PE=1 SV=2	O75663	0	2	1	0	1	1	798.852	1596.7	1596.69	2.09	0.00167	HCD (High Energy Collision Dissociation)	MS2	38.3121	100	48.6188	9694	190923L_SAM6048_BY19_CF_3.raw	F141		5.02	251.8	156.3	156.3	9.49073e-06	0.000468165	0.00036543	0.000637755	8.21128e-05	0.000718133	0.000502386	0.000728863	0	85	1
TRUE	High	Sequest HT (A9)	Unambiguous	[K].VAcAEEWQESR.[T]	C3(HexAz2Si)	1	O75663	TIP41-like protein OS=Homo sapiens OX=9606 GN=TIPRL PE=1 SV=2	O75663	0	2	0.5134	0	1	1	798.85	1596.69	1596.69	-0.53	-0.00043	EThcD (ETD With Supplemental HCD)	MS2	45.6657	250	52.2407	11262	190923L_SAM6048_BY19_CF_4.raw	F140	2.61													0	0	1
TRUE	High	PMI-Byonic (B7)	Unambiguous	[K].VAcAEEWQESR.[T]	C3(HexAz2Si)	1	O75663	TIP41-like protein OS=Homo sapiens OX=9606 GN=TIPRL PE=1 SV=2	O75663	0	2	1	0	1	1	798.85	1596.69	1596.69	-0.53	-0.00043	HCD (High Energy Collision Dissociation)	MS2	45.6657	100	52.2364	11259	190923L_SAM6048_BY19_CF_4.raw	F140		5.05	312	144.6	144.6	8.81257e-06	0.000468165	0.000367579	0.000637755	7.62455e-05	0.000718133	0.000506201	0.000728863	0	85	1
TRUE	High	Sequest HT (A23)	Unambiguous	[K].VAcAEEWQESR.[T]	C3(HexAz2Si)	1	O75663	TIP41-like protein OS=Homo sapiens OX=9606 GN=TIPRL PE=1 SV=2	O75663	0	2	0.5187	0	1	1	798.85	1596.69	1596.69	-0.53	-0.00043	HCD (High Energy Collision Dissociation)	MS2	45.6657	100	52.2364	11259	190923L_SAM6048_BY19_CF_4.raw	F140	2.41													0	0	1
TRUE	High	Sequest HT (A23)	Unambiguous	[K].VAcAEEWQESR.[T]	C3(HexAz2Si)	1	O75663	TIP41-like protein OS=Homo sapiens OX=9606 GN=TIPRL PE=1 SV=2	O75663	0	2	0.4831	0	1	1	798.852	1596.7	1596.69	2.09	0.00167	HCD (High Energy Collision Dissociation)	MS2	38.3121	100	48.6188	9694	190923L_SAM6048_BY19_CF_3.raw	F141	2.36													0	0	1
TRUE	High	PMI-Byonic (B7)	Unambiguous	[K].VAcAEEWQESR.[T]	C3(HexAz2Si)	1	O75663	TIP41-like protein OS=Homo sapiens OX=9606 GN=TIPRL PE=1 SV=2	O75663	0	2	1	0	1	1	798.85	1596.69	1596.69	-0.53	-0.00043	EThcD (ETD With Supplemental HCD)	MS2	45.6657	250	52.2407	11262	190923L_SAM6048_BY19_CF_4.raw	F140		4.66	285.4	129.4	5.1	2.18767e-05	0.000518941	0.000516796	0.00120919	0.000189272	0.000718133	0.00070159	0.00134138	0	85	1
TRUE	High	PMI-Byonic (B7)	Unambiguous	[K].VVNEINIEDLcLTK.[A]	C11(HexAz2Si)	1	Q8N5K1	CDGSH iron-sulfur domain-containing protein 2 OS=Homo sapiens OX=9606 GN=CISD2 PE=1 SV=1	Q8N5K1	0	2	1	0	1	1	946.484	1891.96	1891.97	-2.15	-0.00204	HCD (High Energy Collision Dissociation)	MS2	59.4276	100	78.4443	25654	190923L_SAM6048_BY19_CF_3.raw	F141		8.19	415.9	355	124.3	6.41309e-09	9.40449e-10	0	0	3.70453e-07	5.62071e-08	0	0	0	82	1
TRUE	High	PMI-Byonic (B7)	Unambiguous	[R].EVGGGHGcTSPPFPQEAR.[A]	C8(HexAz2Si)	1	Q6ZN17	Protein lin-28 homolog B OS=Homo sapiens OX=9606 GN=LIN28B PE=1 SV=1	Q6ZN17	0	3	1	0	1	1	705.656	2114.95	2114.95	-0.36	-0.00025	HCD (High Energy Collision Dissociation)	MS2	31.7536	100	50.5594	10599	190923L_SAM6048_BY19_CF_3.raw	F141		3.65	222.1	133	129.6	0.000225857	0.000765345	0.00076266	0.00109051	0.00195361	0.00102417	0.00102082	0.00117302	0	194	1
TRUE	High	PMI-Byonic (B7)	Unambiguous	[R].EVGGGHGcTSPPFPQEAR.[A]	C8(HexAz0Si)	1	Q6ZN17	Protein lin-28 homolog B OS=Homo sapiens OX=9606 GN=LIN28B PE=1 SV=1	Q6ZN17	0	3	1	0	1	1	704.983	2112.93	2112.94	-3.36	-0.00237	HCD (High Energy Collision Dissociation)	MS2	80.4767	100	50.7844	10712	190923L_SAM6048_BY19_CF_3.raw	F141		1.21	84.6	84.6	34.3	0.0619776	0.00426945	0.00423579	0.00637213	0.480318	0.0332562	0.0332178	0.0532473	0	194	1
TRUE	High	Sequest HT (A23)	Unambiguous	[R].FcEMccDcR.[M]	C2(Carbamidomethyl); C5(Carbamidomethyl); C6(Carbamidomethyl); C8(HexAz2Si)	1	Q8TF05	Serine/threonine-protein phosphatase 4 regulatory subunit 1 OS=Homo sapiens OX=9606 GN=PPP4R1 PE=1 SV=1	Q8TF05	0	2	0.7539	0	1	1	785.266	1569.52	1569.52	0.97	0.00076	HCD (High Energy Collision Dissociation)	MS2	42.0832	100	48.3837	9301	190923L_SAM6048_BY19_CF_4.raw	F140	1.91													0	0	1
TRUE	High	Sequest HT (A23)	Unambiguous	[R].FcEMccDcR.[M]	C2(Carbamidomethyl); C5(Carbamidomethyl); C6(Carbamidomethyl); C8(HexAz2Si)	1	Q8TF05	Serine/threonine-protein phosphatase 4 regulatory subunit 1 OS=Homo sapiens OX=9606 GN=PPP4R1 PE=1 SV=1	Q8TF05	0	2	0.7756	0	1	1	785.265	1569.52	1569.52	0.26	0.0002	HCD (High Energy Collision Dissociation)	MS2	60.4539	100	44.9512	8056	190923L_SAM6048_BY19_CF_3.raw	F141	2.05													0	0	1
TRUE	High	PMI-Byonic (B7)	Unambiguous	[R].IFGSIPMQAcQQK.[D]	C10(HexAz2Si)	1	Q6NZY4	Zinc finger CCHC domain-containing protein 8 OS=Homo sapiens OX=9606 GN=ZCCHC8 PE=1 SV=2	Q6NZY4	0	2	1	0	1	1	870.424	1739.84	1739.84	-0.97	-0.00084	HCD (High Energy Collision Dissociation)	MS2	33.9212	100	68.6087	19773	190923L_SAM6048_BY19_CF_4.raw	F140		5.77	349	238.5	113.6	1.71352e-06	0.000468165	0.00042526	0.000727273	1.48253e-05	0.000718133	0.000618812	0.000859106	0	384	1
TRUE	High	PMI-Byonic (B7)	Unambiguous	[R].INISEGNcPER.[I]	C8(HexAz2Si)	1	Q15366	Poly(rC)-binding protein 2 OS=Homo sapiens OX=9606 GN=PCBP2 PE=1 SV=1	Q15366	0	2	1	0	1	1	760.855	1520.7	1520.7	2.69	0.00205	HCD (High Energy Collision Dissociation)	MS2	32.7897	100	48.6158	9426	190923L_SAM6048_BY19_CF_4.raw	F140		6.58	404.3	265.3	154.6	2.64455e-07	3.69977e-08	0	0	1.52761e-05	0.000718133	0.000616523	0	0	47	1
TRUE	High	PMI-Byonic (B7)	Unambiguous	[R].INISEGNcPER.[I]	C8(HexAz2Si)	1	Q15366	Poly(rC)-binding protein 2 OS=Homo sapiens OX=9606 GN=PCBP2 PE=1 SV=1	Q15366	0	2	1	0	1	1	760.852	1520.7	1520.7	-0.8	-0.00061	HCD (High Energy Collision Dissociation)	MS2	23.6598	100	45.0664	8119	190923L_SAM6048_BY19_CF_3.raw	F141		4.2	229.5	164.1	102.6	6.28981e-05	0.000678541	0.000647249	0	0.00362042	0.00102417	0.000985028	0	0	47	1
TRUE	High	PMI-Byonic (B7)	Unambiguous	[R].INISEGNcPER.[I]	C8(HexAz2Si)	1	Q15366	Poly(rC)-binding protein 2 OS=Homo sapiens OX=9606 GN=PCBP2 PE=1 SV=1	Q15366	0	2	1	0	1	1	760.853	1520.7	1520.7	0.55	0.00042	HCD (High Energy Collision Dissociation)	MS2	6.76059	100	46.1449	8620	190923L_SAM6048_BY19_CF_3.raw	F141		8.33	446	295.3	96.5	4.71202e-09	6.17291e-10	0	0	2.72191e-07	3.71281e-08	0	0	0	47	1
TRUE	High	Sequest HT (A23)	Unambiguous	[R].INISEGNcPER.[I]	C8(HexAz2Si)	1	Q15366	Poly(rC)-binding protein 2 OS=Homo sapiens OX=9606 GN=PCBP2 PE=1 SV=1	Q15366	0	2	0.0923	0	1	1	760.854	1520.7	1520.7	2.23	0.0017	HCD (High Energy Collision Dissociation)	MS2	10.7022	100	49.6695	9953	190923L_SAM6048_BY19_CF_4.raw	F140	2.6													0	0	3
TRUE	High	PMI-Byonic (B7)	Unambiguous	[R].INISEGNcPER.[I]	C8(HexAz2Si)	1	Q15366	Poly(rC)-binding protein 2 OS=Homo sapiens OX=9606 GN=PCBP2 PE=1 SV=1	Q15366	0	2	1	0	1	1	760.854	1520.7	1520.7	2.23	0.0017	HCD (High Energy Collision Dissociation)	MS2	10.7022	100	49.6695	9953	190923L_SAM6048_BY19_CF_4.raw	F140		8.31	414.6	337.2	122.5	4.89974e-09	6.59544e-10	0	0	2.83034e-07	3.96913e-08	0	0	0	47	1
TRUE	High	PMI-Byonic (B7)	Unambiguous	[R].LQGINcGPDFTPSFANLGR.[T]	C6(HexAz2Si)	1	Q04637	Eukaryotic translation initiation factor 4 gamma 1 OS=Homo sapiens OX=9606 GN=EIF4G1 PE=1 SV=4	Q04637	0	2	1	0	1	1	1148.55	2296.1	2296.1	-0.46	-0.00053	HCD (High Energy Collision Dissociation)	MS2	15.2114	100	79.9658	26521	190923L_SAM6048_BY19_CF_3.raw	F141		9.92	490.1	428.2	31.1	1.19307e-10	1.89731e-11	0	0	6.8918e-09	1.13624e-09	0	0	0	657	1
TRUE	High	PMI-Byonic (B7)	Unambiguous	[R].LQGINcGPDFTPSFANLGR.[T]	C6(HexAz2Si)	1	Q04637	Eukaryotic translation initiation factor 4 gamma 1 OS=Homo sapiens OX=9606 GN=EIF4G1 PE=1 SV=4	Q04637	0	2	1	0	1	1	1148.55	2296.1	2296.1	-0.38	-0.00044	HCD (High Energy Collision Dissociation)	MS2	23.3594	100	85.6432	29675	190923L_SAM6048_BY19_CF_4.raw	F140		9.92	482.1	431.9	16	1.19307e-10	1.88842e-11	0	0	6.8918e-09	1.12997e-09	0	0	0	657	1
TRUE	High	Sequest HT (A23)	Unambiguous	[R].LQGINcGPDFTPSFANLGR.[T]	C6(HexAz2Si)	1	Q04637	Eukaryotic translation initiation factor 4 gamma 1 OS=Homo sapiens OX=9606 GN=EIF4G1 PE=1 SV=4	Q04637	0	2	0.0518	0	1	1	1148.55	2296.1	2296.1	-0.38	-0.00044	HCD (High Energy Collision Dissociation)	MS2	23.3594	100	85.6432	29675	190923L_SAM6048_BY19_CF_4.raw	F140	3.86													0	0	1
TRUE	High	PMI-Byonic (B7)	Unambiguous	[R].LVVPATQcGSLIGK.[G]	C8(HexAz2Si)	1	Q15365	Poly(rC)-binding protein 1 OS=Homo sapiens OX=9606 GN=PCBP1 PE=1 SV=2	Q15365	0	2	1	0	1	1	837.956	1674.9	1674.91	-1.19	-0.00099	HCD (High Energy Collision Dissociation)	MS2	39.5987	100	62.7166	16776	190923L_SAM6048_BY19_CF_3.raw	F141		8.13	400.5	207.5	154.9	7.41752e-09	1.11796e-09	0	0	4.28474e-07	6.56088e-08	0	0	0	102	1
TRUE	High	PMI-Byonic (B7)	Unambiguous	[R].LVVPATQcGSLIGK.[G]	C8(HexAz2Si)	1	Q15365	Poly(rC)-binding protein 1 OS=Homo sapiens OX=9606 GN=PCBP1 PE=1 SV=2	Q15365	0	2	1	0	1	1	837.957	1674.91	1674.91	0.63	0.00053	HCD (High Energy Collision Dissociation)	MS2	37.2223	100	63.7865	17348	190923L_SAM6048_BY19_CF_3.raw	F141		2.89	241.4	76.1	76.1	0.00128576	0.000851305	0.000850581	0	0.0692578	0.00451389	0.00450372	0	0	102	1
TRUE	High	PMI-Byonic (B7)	Unambiguous	[R].LVVPATQcGSLIGK.[G]	C8(HexAz2Si)	1	Q15365	Poly(rC)-binding protein 1 OS=Homo sapiens OX=9606 GN=PCBP1 PE=1 SV=2	Q15365	0	2	1	0	1	1	837.955	1674.9	1674.91	-1.76	-0.00147	HCD (High Energy Collision Dissociation)	MS2	33.0957	100	68.0867	19480	190923L_SAM6048_BY19_CF_4.raw	F140		6.86	365.4	188.7	152.4	1.37876e-07	2.04663e-08	0	0	7.96434e-06	0.000718133	0.000684931	0	0	102	1
TRUE	High	Sequest HT (A23)	Unambiguous	[R].LYYFQYPcYQEGLR.[S]	C8(HexAz2Si)	1	Q9NRW3	DNA dC->dU-editing enzyme APOBEC-3C OS=Homo sapiens OX=9606 GN=APOBEC3C PE=1 SV=2	Q9NRW3	0	2	0.6978	0	1	1	1066.49	2131.97	2131.98	-2.32	-0.00248	HCD (High Energy Collision Dissociation)	MS2	47.453	100	78.5907	25743	190923L_SAM6048_BY19_CF_3.raw	F141	2.78													0	0	1
TRUE	High	PMI-Byonic (B7)	Unambiguous	[R].LYYFQYPcYQEGLR.[S]	C8(HexAz2Si)	1	Q9NRW3	DNA dC->dU-editing enzyme APOBEC-3C OS=Homo sapiens OX=9606 GN=APOBEC3C PE=1 SV=2	Q9NRW3	0	2	1	0	1	1	1066.49	2131.97	2131.98	-2.32	-0.00248	HCD (High Energy Collision Dissociation)	MS2	47.453	100	78.5907	25743	190923L_SAM6048_BY19_CF_3.raw	F141		9.52	440.1	417.1	417.1	2.99217e-10	4.9596e-11	0	0	1.72843e-08	3.05259e-09	0	0	0	123	1
TRUE	High	PMI-Byonic (B7)	Unambiguous	[R].NLFIScK.[S]	C6(HexAz2Si)	1	P42166	Lamina-associated polypeptide 2, isoform alpha OS=Homo sapiens OX=9606 GN=TMPO PE=1 SV=2	P42166	0	2	1	0	1	1	557.283	1113.56	1113.56	0.69	0.00038	HCD (High Energy Collision Dissociation)	MS2	55.59	100	54.3188	12450	190923L_SAM6048_BY19_CF_3.raw	F141		2.75	264.6	21.4	21.4	0.00176399	0.000851305	0.000827815	0.001001	0.0934974	0.00668003	0.00667891	0.012476	0	275	1
TRUE	High	Sequest HT (A23)	Unambiguous	[R].NLFIScK.[S]	C6(HexAz2Si)	1	P42166	Lamina-associated polypeptide 2, isoform alpha OS=Homo sapiens OX=9606 GN=TMPO PE=1 SV=2	P42166	0	2	0.0524	0	1	1	557.283	1113.56	1113.56	0.69	0.00038	HCD (High Energy Collision Dissociation)	MS2	55.59	100	54.3188	12450	190923L_SAM6048_BY19_CF_3.raw	F141	1.91													0	0	1
TRUE	High	PMI-Byonic (B7)	Unambiguous	[R].SILSPGGScGPIK.[V]	C9(HexAz2Si)	1	P78347	General transcription factor II-I OS=Homo sapiens OX=9606 GN=GTF2I PE=1 SV=2	P78347	0	2	1	0	1	1	752.886	1504.77	1504.76	0.52	0.00039	HCD (High Energy Collision Dissociation)	MS2	40.6593	100	62.6637	16554	190923L_SAM6048_BY19_CF_4.raw	F140		7.64	484.5	306	183.1	2.28884e-08	2.80761e-09	0	0	1.32215e-06	1.61702e-07	0	0	0	207	1
TRUE	High	PMI-Byonic (B7)	Unambiguous	[K].AINcATSGVVGLVNcLR.[R]	C4(monoHexAz2Si); C15(Carbamidomethyl)	1	P49327	Fatty acid synthase OS=Homo sapiens OX=9606 GN=FASN PE=1 SV=3	P49327	0	2	1	0	1	1	1039.52	2078.04	2078.03	3.89	0.00404	HCD (High Energy Collision Dissociation)	MS2	39.2993	100	83.6043	28564	190923L_SAM6048_BY19_CF_3.raw	F141		5.73	358.4	293.3	0.6	1.87564e-06	0.000249875	0.00023084	0.000761615	0.00016846	0.000701508	0.000533618	0.000748503	0	1445	1
TRUE	High	Sequest HT (A3)	Unambiguous	[K].AINcATSGVVGLVNcLR.[R]	C4(monoHexAz2Si); C15(Carbamidomethyl)	1	P49327	Fatty acid synthase OS=Homo sapiens OX=9606 GN=FASN PE=1 SV=3	P49327	0	2	0.0923	0	1	1	1039.52	2078.04	2078.03	3.89	0.00404	HCD (High Energy Collision Dissociation)	MS2	39.2993	100	83.6043	28564	190923L_SAM6048_BY19_CF_3.raw	F141	2.71													0	0	1
TRUE	High	PMI-Byonic (B7)	Unambiguous	[K].FINYVKNcFR.[M]	C8(monoHexAz2Si)	1	P06748	Nucleophosmin OS=Homo sapiens OX=9606 GN=NPM1 PE=1 SV=2	P06748	1	2	1	0	1	1	817.903	1634.8	1634.8	1.57	0.00129	HCD (High Energy Collision Dissociation)	MS2	40.8877	100	65.2103	18126	190923L_SAM6048_BY19_CF_3.raw	F141		4.12	364	167.5	115.2	7.55669e-05	0.000451569	0.000347766	0.000777001	0.00673892	0.00275307	0.00274551	0.000764526	0	268	1
TRUE	High	PMI-Byonic (B7)	Unambiguous	[K].FINYVKNcFR.[M]	C8(monoHexAz2Si)	1	P06748	Nucleophosmin OS=Homo sapiens OX=9606 GN=NPM1 PE=1 SV=2	P06748	1	2	1	0	1	1	817.901	1634.8	1634.8	-0.89	-0.00073	HCD (High Energy Collision Dissociation)	MS2	36.563	100	64.0706	17503	190923L_SAM6048_BY19_CF_3.raw	F141		4.51	373.2	205.9	114.5	3.05864e-05	0.000451569	0.000366435	0.000777001	0.00274009	0.00133008	0.00131435	0.000764526	0	268	1
TRUE	High	PMI-Byonic (B7)	Unambiguous	[K].FINYVKNcFR.[M]	C8(monoHexAz2Si)	1	P06748	Nucleophosmin OS=Homo sapiens OX=9606 GN=NPM1 PE=1 SV=2	P06748	1	2	1	0	1	1	817.902	1634.8	1634.8	-0.12	-0.0001	HCD (High Energy Collision Dissociation)	MS2	15.9682	100	69.8063	20452	190923L_SAM6048_BY19_CF_4.raw	F140		3.35	415.1	94.7	89.7	0.000446694	0.000957243	0.000956175	0.000777001	0.0385369	0.00434182	0.00430866	0.000764526	0	268	1
TRUE	High	PMI-Byonic (B7)	Unambiguous	[K].FINYVKNcFR.[M]	C8(monoHexAz2Si)	1	P06748	Nucleophosmin OS=Homo sapiens OX=9606 GN=NPM1 PE=1 SV=2	P06748	1	3	1	0	1	1	545.604	1634.8	1634.8	1.48	0.00081	HCD (High Energy Collision Dissociation)	MS2	60.8111	100	68.9522	19975	190923L_SAM6048_BY19_CF_4.raw	F140		5.81	337.7	230.9	179.8	1.53398e-06	0.000249875	0.000236128	0.000777001	0.000137779	0.000701508	0.000545405	0.000764526	0	268	1
TRUE	High	PMI-Byonic (B7)	Unambiguous	[K].NVEcAR.[V]	C4(monoHexAz2Si)	1	Q9HD42	Charged multivesicular body protein 1a OS=Homo sapiens OX=9606 GN=CHMP1A PE=1 SV=1	Q9HD42	0	2	1	0	1	1	511.729	1022.45	1022.45	-4.15	-0.00212	HCD (High Energy Collision Dissociation)	MS2	25.9827	100	35.1153	3547	190923L_SAM6048_BY19_CF_3.raw	F141		0.94	248.8	21.8	21.8	0.113768	0.00677006	0.0067659	0.00327869	0.521862	0.0343915	0.0343755	0.0183532	0	41	1
TRUE	High	PMI-Byonic (B7)	Unambiguous	[K].NVEcAR.[V]	C4(monoHexAz2Si)	1	Q9HD42	Charged multivesicular body protein 1a OS=Homo sapiens OX=9606 GN=CHMP1A PE=1 SV=1	Q9HD42	0	2	1	0	1	1	511.73	1022.45	1022.45	-1.46	-0.00075	HCD (High Energy Collision Dissociation)	MS2	32.8066	100	36.9832	4105	190923L_SAM6048_BY19_CF_4.raw	F140		1.39	242.2	77.4	57.3	0.0407751	0.00323206	0.00321875	0.00327869	0.193366	0.0120314	0.012	0.0183532	0	41	1
TRUE	High	PMI-Byonic (B7)	Unambiguous	[K].STLTDSLVcK.[A]	C9(monoHexAz2Si)	1	P13639	Elongation factor 2 OS=Homo sapiens OX=9606 GN=EEF2 PE=1 SV=4	P13639	0	2	1	0	1	1	699.344	1397.68	1397.68	0.74	0.00052	HCD (High Energy Collision Dissociation)	MS2	32.761	100	61.5793	16156	190923L_SAM6048_BY19_CF_3.raw	F141		7.17	529.9	204.5	110.6	6.73436e-08	8.60409e-09	0	0	6.04944e-06	7.80533e-07	0	0	0	33	1
TRUE	High	PMI-Byonic (B7)	Unambiguous	[K].STLTDSLVcK.[A]	C9(monoHexAz2Si)	1	P13639	Elongation factor 2 OS=Homo sapiens OX=9606 GN=EEF2 PE=1 SV=4	P13639	0	2	1	0	1	1	699.342	1397.68	1397.68	-1.55	-0.00108	HCD (High Energy Collision Dissociation)	MS2	32.2243	100	67.1606	18975	190923L_SAM6048_BY19_CF_4.raw	F140		8.17	509	246.9	117.8	6.74895e-09	8.58214e-10	0	0	6.06258e-07	8.40977e-08	0	0	0	33	1
TRUE	High	PMI-Byonic (B7)	Unambiguous	[K].STLTDSLVcK.[A]	C9(monoHexAz2Si)	1	P13639	Elongation factor 2 OS=Homo sapiens OX=9606 GN=EEF2 PE=1 SV=4	P13639	0	2	1	0	1	1	699.34	1397.67	1397.68	-5.5	-0.00384	HCD (High Energy Collision Dissociation)	MS2	68.1514	100	68.2147	19546	190923L_SAM6048_BY19_CF_4.raw	F140		5.54	417	192	172.5	2.87166e-06	0.000451569	0.000442478	0	0.000257895	0.000701508	0.000512689	0	0	33	1
TRUE	High	Sequest HT (A3)	Unambiguous	[K].STLTDSLVcK.[A]	C9(monoHexAz2Si)	1	P13639	Elongation factor 2 OS=Homo sapiens OX=9606 GN=EEF2 PE=1 SV=4	P13639	0	2	0.2189	0	1	1	699.344	1397.68	1397.68	0.74	0.00052	HCD (High Energy Collision Dissociation)	MS2	32.761	100	61.5793	16156	190923L_SAM6048_BY19_CF_3.raw	F141	2.97													0	0	1
TRUE	High	Sequest HT (A3)	Unambiguous	[K].STLTDSLVcK.[A]	C9(monoHexAz2Si)	1	P13639	Elongation factor 2 OS=Homo sapiens OX=9606 GN=EEF2 PE=1 SV=4	P13639	0	2	0.249	0	1	1	699.34	1397.67	1397.68	-5.5	-0.00384	HCD (High Energy Collision Dissociation)	MS2	68.1514	100	68.2147	19546	190923L_SAM6048_BY19_CF_4.raw	F140	2.45													0	0	1
TRUE	High	Sequest HT (A3)	Unambiguous	[K].STLTDSLVcK.[A]	C9(monoHexAz2Si)	1	P13639	Elongation factor 2 OS=Homo sapiens OX=9606 GN=EEF2 PE=1 SV=4	P13639	0	2	0.3193	0	1	1	699.342	1397.68	1397.68	-1.55	-0.00108	HCD (High Energy Collision Dissociation)	MS2	32.2243	100	67.1606	18975	190923L_SAM6048_BY19_CF_4.raw	F140	3.32													0	0	1
TRUE	High	PMI-Byonic (B7)	Unambiguous	[R].INISEGNcPER.[I]	C8(monoHexAz2Si)	1	Q15366	Poly(rC)-binding protein 2 OS=Homo sapiens OX=9606 GN=PCBP2 PE=1 SV=1	Q15366	0	2	1	0	1	1	781.86	1562.71	1562.71	2.38	0.00186	HCD (High Energy Collision Dissociation)	MS2	64.3	100	54.7074	12368	190923L_SAM6048_BY19_CF_4.raw	F140		5.83	337.5	210.8	79.2	1.49073e-06	0.000249875	0.000236855	0	0.000133895	0.000701508	0.000547196	0.00103734	0	47	1
TRUE	High	PMI-Byonic (B7)	Unambiguous	[R].INISEGNcPER.[I]	C8(monoHexAz2Si)	1	Q15366	Poly(rC)-binding protein 2 OS=Homo sapiens OX=9606 GN=PCBP2 PE=1 SV=1	Q15366	0	2	1	0	1	1	781.859	1562.71	1562.71	1.98	0.00155	HCD (High Energy Collision Dissociation)	MS2	0	100	53.6812	11916	190923L_SAM6048_BY19_CF_4.raw	F140		6.85	360.5	251.6	92.5	1.40833e-07	1.87609e-08	0	0	1.26508e-05	0.000413736	0.000386847	0.00103734	0	47	1
TRUE	High	PMI-Byonic (B7)	Unambiguous	[R].INISEGNcPER.[I]	C8(monoHexAz2Si)	1	Q15366	Poly(rC)-binding protein 2 OS=Homo sapiens OX=9606 GN=PCBP2 PE=1 SV=1	Q15366	0	2	1	0	1	1	781.856	1562.7	1562.71	-2.58	-0.00202	HCD (High Energy Collision Dissociation)	MS2	0	100	49.5056	10077	190923L_SAM6048_BY19_CF_3.raw	F141		5.45	291.2	202.9	113.8	3.58087e-06	0.000451569	0.000433276	0	0.000321567	0.000701508	0.000503525	0.00103734	0	47	1
TRUE	High	PMI-Byonic (B7)	Unambiguous	[R].INISEGNcPER.[I]	C8(monoHexAz2Si)	1	Q15366	Poly(rC)-binding protein 2 OS=Homo sapiens OX=9606 GN=PCBP2 PE=1 SV=1	Q15366	0	2	1	0	1	1	781.858	1562.71	1562.71	-0.44	-0.00034	HCD (High Energy Collision Dissociation)	MS2	25.772	100	50.5205	10579	190923L_SAM6048_BY19_CF_3.raw	F141		6.86	387.2	255.4	92.2	1.37872e-07	1.84408e-08	0	0	1.23849e-05	0.000413736	0.000387898	0.00103734	0	47	1
TRUE	High	PMI-Byonic (B7)	Unambiguous	[R].INISEGNcPER.[I]	C8(monoHexAz2Si)	1	Q15366	Poly(rC)-binding protein 2 OS=Homo sapiens OX=9606 GN=PCBP2 PE=1 SV=1	Q15366	0	2	1	0	1	1	781.857	1562.71	1562.71	-0.72	-0.00056	HCD (High Energy Collision Dissociation)	MS2	23.3254	100	51.5282	11070	190923L_SAM6048_BY19_CF_3.raw	F141		4.65	293.3	161.8	84.9	2.26327e-05	0.000451569	0.000373204	0	0.002029	0.0011566	0.00111062	0.00103734	0	47	1
TRUE	High	Sequest HT (A3)	Unambiguous	[R].INISEGNcPER.[I]	C8(monoHexAz2Si)	1	Q15366	Poly(rC)-binding protein 2 OS=Homo sapiens OX=9606 GN=PCBP2 PE=1 SV=1	Q15366	0	2	0.0685	0	1	1	781.856	1562.7	1562.71	-2.58	-0.00202	HCD (High Energy Collision Dissociation)	MS2	0	100	49.5056	10077	190923L_SAM6048_BY19_CF_3.raw	F141	2.48													0	0	3
TRUE	High	PMI-Byonic (B7)	Unambiguous	[R].INISEGNcPER.[I]	C8(monoHexAz2Si)	1	Q15366	Poly(rC)-binding protein 2 OS=Homo sapiens OX=9606 GN=PCBP2 PE=1 SV=1	Q15366	0	2	1	0	1	1	781.858	1562.71	1562.71	0.75	0.00059	HCD (High Energy Collision Dissociation)	MS2	68.7063	100	56.0158	13054	190923L_SAM6048_BY19_CF_4.raw	F140		4.27	232	174.8	91.3	5.40204e-05	0.000451569	0.000352983	0	0.00482906	0.00234592	0.00234542	0.00103734	0	47	1
TRUE	High	Sequest HT (A3)	Unambiguous	[R].INISEGNcPER.[I]	C8(monoHexAz2Si)	1	Q15366	Poly(rC)-binding protein 2 OS=Homo sapiens OX=9606 GN=PCBP2 PE=1 SV=1	Q15366	0	2	0.1004	0	1	1	781.859	1562.71	1562.71	1.98	0.00155	HCD (High Energy Collision Dissociation)	MS2	0	100	53.6812	11916	190923L_SAM6048_BY19_CF_4.raw	F140	2.49													0	0	3
TRUE	High	PMI-Byonic (B7)	Unambiguous	[R].QVQSLTcEVDALK.[G]	C7(monoHexAz2Si)	1	P08670	Vimentin OS=Homo sapiens OX=9606 GN=VIM PE=1 SV=4	P08670	0	2	1	0	1	1	882.937	1764.87	1764.87	0.49	0.00044	HCD (High Energy Collision Dissociation)	MS2	20.2937	100	69.5794	20598	190923L_SAM6048_BY19_CF_3.raw	F141		7.56	550.4	320.9	42.6	2.78065e-08	3.64369e-09	0	0	2.49786e-06	3.17136e-07	0	0	0	322	1
TRUE	High	Sequest HT (A3)	Unambiguous	[R].QVQSLTcEVDALK.[G]	C7(monoHexAz2Si)	1	P08670	Vimentin OS=Homo sapiens OX=9606 GN=VIM PE=1 SV=4	P08670	0	2	0.0782	0	1	1	882.937	1764.87	1764.87	0.49	0.00044	HCD (High Energy Collision Dissociation)	MS2	20.2937	100	69.5794	20598	190923L_SAM6048_BY19_CF_3.raw	F141	3.58													0	0	1
TRUE	High	PMI-Byonic (B7)	Unambiguous	[R].QVQSLTcEVDALK.[G]	C7(monoHexAz2Si)	1	P08670	Vimentin OS=Homo sapiens OX=9606 GN=VIM PE=1 SV=4	P08670	0	2	1	0	1	1	882.939	1764.87	1764.87	3.15	0.00278	HCD (High Energy Collision Dissociation)	MS2	51.5786	100	73.7221	22672	190923L_SAM6048_BY19_CF_4.raw	F140		3.04	242.9	136	68.4	0.000902747	0.0012405	0.00122436	0	0.0750975	0.00588347	0.00582488	0	0	322	1
TRUE	High	PMI-Byonic (B7)	Unambiguous	[R].QVQSLTcEVDALK.[G]	C7(monoHexAz2Si)	1	P08670	Vimentin OS=Homo sapiens OX=9606 GN=VIM PE=1 SV=4	P08670	0	2	1	0	1	1	882.937	1764.87	1764.87	1.16	0.00102	HCD (High Energy Collision Dissociation)	MS2	47.5989	100	74.9593	23399	190923L_SAM6048_BY19_CF_4.raw	F140		7.6	461.2	347.5	57	2.52044e-08	3.28987e-09	0	0	2.26411e-06	2.87742e-07	0	0	0	322	1
TRUE	High	Sequest HT (A3)	Unambiguous	[K].NVEcAR.[V]	C4(diHexAz2Si)	1	Q9HD42	Charged multivesicular body protein 1a OS=Homo sapiens OX=9606 GN=CHMP1A PE=1 SV=1	Q9HD42	0	2	0.4615	0	1	1	532.736	1064.46	1064.46	-0.18	-0.0001	HCD (High Energy Collision Dissociation)	MS2	43.2909	100	42.8379	6936	190923L_SAM6048_BY19_CF_3.raw	F141	1.82													0	0	1
TRUE	High	PMI-Byonic (B7)	Unambiguous	[K].NVEcAR.[V]	C4(diHexAz2Si)	1	Q9HD42	Charged multivesicular body protein 1a OS=Homo sapiens OX=9606 GN=CHMP1A PE=1 SV=1	Q9HD42	0	2	1	0	1	1	532.736	1064.46	1064.46	-0.18	-0.0001	HCD (High Energy Collision Dissociation)	MS2	43.2909	100	42.8379	6936	190923L_SAM6048_BY19_CF_3.raw	F141		1.6	265.6	99.3	39.6	0.0251712	0.00303658	0.00303365	0.00296296	0.12007	0.00852919	0.00852434	0.0108225	0	41	1
TRUE	High	PMI-Byonic (B7)	Unambiguous	[K].NVEcAR.[V]	C4(diHexAz2Si)	1	Q9HD42	Charged multivesicular body protein 1a OS=Homo sapiens OX=9606 GN=CHMP1A PE=1 SV=1	Q9HD42	0	2	1	0	1	1	532.736	1064.46	1064.46	0.25	0.00013	HCD (High Energy Collision Dissociation)	MS2	71.8645	100	41.8095	6418	190923L_SAM6048_BY19_CF_3.raw	F141		0.81	187	90.9	74.9	0.155853	0.00905797	0.0090568	0.00296296	0.688738	0.0593417	0.0593233	0.0108225	0	41	1
TRUE	High	PMI-Byonic (B7)	Unambiguous	[K].NVEcAR.[V]	C4(diHexAz2Si)	1	Q9HD42	Charged multivesicular body protein 1a OS=Homo sapiens OX=9606 GN=CHMP1A PE=1 SV=1	Q9HD42	0	2	1	0	1	1	532.736	1064.46	1064.46	-0.32	-0.00017	HCD (High Energy Collision Dissociation)	MS2	32.8543	100	42.0855	6194	190923L_SAM6048_BY19_CF_4.raw	F140		0.89	196.1	64.7	54.3	0.128965	0.00806661	0.00806032	0.00296296	0.586448	0.0457506	0.0457288	0.0108225	0	41	1
TRUE	High	PMI-Byonic (B7)	Unambiguous	[K].NVEcAR.[V]	C4(diHexAz2Si)	1	Q9HD42	Charged multivesicular body protein 1a OS=Homo sapiens OX=9606 GN=CHMP1A PE=1 SV=1	Q9HD42	0	2	1	0	1	1	532.735	1064.46	1064.46	-1.82	-0.00097	HCD (High Energy Collision Dissociation)	MS2	30.5487	100	43.103	6677	190923L_SAM6048_BY19_CF_4.raw	F140		1.26	228.6	86.1	26.2	0.0554191	0.00409277	0.00405351	0.00296296	0.262274	0.0173728	0.0173697	0.0108225	0	41	1
TRUE	High	PMI-Byonic (B7)	Unambiguous	[K].NVEcAR.[V]	C4(diHexAz2Si)	1	Q9HD42	Charged multivesicular body protein 1a OS=Homo sapiens OX=9606 GN=CHMP1A PE=1 SV=1	Q9HD42	0	2	1	0	1	1	532.736	1064.46	1064.46	0.18	9e-05	HCD (High Energy Collision Dissociation)	MS2	72.2221	100	46.4181	8294	190923L_SAM6048_BY19_CF_4.raw	F140		1.25	250.1	76.5	40.1	0.0561437	0.00409277	0.00405296	0.00296296	0.265665	0.017646	0.0176398	0.0108225	0	41	1
TRUE	High	PMI-Byonic (B7)	Unambiguous	[K].NVEcAR.[V]	C4(diHexAz2Si)	1	Q9HD42	Charged multivesicular body protein 1a OS=Homo sapiens OX=9606 GN=CHMP1A PE=1 SV=1	Q9HD42	0	2	1	0	1	1	532.736	1064.46	1064.46	-0.19	-0.0001	HCD (High Energy Collision Dissociation)	MS2	0	100	39.8967	5507	190923L_SAM6048_BY19_CF_3.raw	F141		1.6	249.4	91.2	64.7	0.0253272	0.00303658	0.00303281	0.00296296	0.120812	0.00852919	0.00851789	0.0108225	0	41	1
TRUE	High	PMI-Byonic (B7)	Unambiguous	[K].NVEcAR.[V]	C4(diHexAz2Si)	1	Q9HD42	Charged multivesicular body protein 1a OS=Homo sapiens OX=9606 GN=CHMP1A PE=1 SV=1	Q9HD42	0	2	1	0	1	1	532.736	1064.46	1064.46	-0.07	-4e-05	HCD (High Energy Collision Dissociation)	MS2	24.6549	100	38.8817	5048	190923L_SAM6048_BY19_CF_3.raw	F141		0.89	177.3	59.1	59.1	0.128064	0.00806661	0.00806242	0.00296296	0.582803	0.0447096	0.0446599	0.0108225	0	41	1
TRUE	High	PMI-Byonic (B7)	Unambiguous	[K].STAcQMLVcYAK.[E]	C4(Carbamidomethyl); C9(diHexAz2Si)	1	O00410	Importin-5 OS=Homo sapiens OX=9606 GN=IPO5 PE=1 SV=4	O00410	0	2	1	0	1	1	874.388	1747.77	1747.77	1.47	0.00129	HCD (High Energy Collision Dissociation)	MS2	88.5885	100	71.4834	21656	190923L_SAM6048_BY19_CF_3.raw	F141		4.8	220.1	181	167.4	1.60198e-05	0.000501756	0.000414594	0.00069541	0.00149825	0.00120308	0.00119503	0.00205339	0	679	1
TRUE	High	Sequest HT (A3)	Unambiguous	[K].STAcQMLVcYAK.[E]	C4(Carbamidomethyl); C9(diHexAz2Si)	1	O00410	Importin-5 OS=Homo sapiens OX=9606 GN=IPO5 PE=1 SV=4	O00410	0	2	0.5714	0	1	1	874.388	1747.77	1747.77	1.47	0.00129	HCD (High Energy Collision Dissociation)	MS2	88.5885	100	71.4834	21656	190923L_SAM6048_BY19_CF_3.raw	F141	2.03													0	0	1
TRUE	High	Sequest HT (A3)	Unambiguous	[K].STAcQMLVcYAK.[E]	C4(Carbamidomethyl); C9(diHexAz2Si)	1	O00410	Importin-5 OS=Homo sapiens OX=9606 GN=IPO5 PE=1 SV=4	O00410	0	2	0.5805	0	1	1	874.388	1747.77	1747.77	0.8	0.0007	HCD (High Energy Collision Dissociation)	MS2	54.2431	100	72.5301	22266	190923L_SAM6048_BY19_CF_3.raw	F141	2.36													0	0	1
TRUE	High	PMI-Byonic (B7)	Unambiguous	[K].STAcQMLVcYAK.[E]	C4(Carbamidomethyl); C9(diHexAz2Si)	1	O00410	Importin-5 OS=Homo sapiens OX=9606 GN=IPO5 PE=1 SV=4	O00410	0	2	1	0	1	1	874.388	1747.77	1747.77	0.8	0.0007	HCD (High Energy Collision Dissociation)	MS2	54.2431	100	72.5301	22266	190923L_SAM6048_BY19_CF_3.raw	F141		4.84	297.5	225.6	186.2	1.43117e-05	0.000501756	0.00041806	0.00069541	0.00133872	0.000992802	0.000963391	0.00205339	0	679	1
TRUE	High	PMI-Byonic (B7)	Unambiguous	[K].STLTDSLVcK.[A]	C9(diHexAz2Si)	1	P13639	Elongation factor 2 OS=Homo sapiens OX=9606 GN=EEF2 PE=1 SV=4	P13639	0	2	1	0	1	1	720.35	1439.69	1439.69	1.27	0.00091	HCD (High Energy Collision Dissociation)	MS2	25.3483	100	67.4751	19404	190923L_SAM6048_BY19_CF_3.raw	F141		6.64	406	191.1	86.1	2.26885e-07	3.18996e-08	0	0	2.12507e-05	0.000789889	0.000766871	0.00103093	0	33	1
TRUE	High	PMI-Byonic (B7)	Unambiguous	[K].STLTDSLVcK.[A]	C9(diHexAz2Si)	1	P13639	Elongation factor 2 OS=Homo sapiens OX=9606 GN=EEF2 PE=1 SV=4	P13639	0	2	1	0	1	1	720.351	1439.7	1439.69	3.31	0.00239	HCD (High Energy Collision Dissociation)	MS2	61.5164	100	72.472	21936	190923L_SAM6048_BY19_CF_4.raw	F140		2.43	223.4	85.6	85.6	0.0036933	0.0025974	0.00255678	0	0.261564	0.0168619	0.0168529	0.00103093	0	33	1
TRUE	High	PMI-Byonic (B7)	Unambiguous	[K].STLTDSLVcK.[A]	C9(diHexAz2Si)	1	P13639	Elongation factor 2 OS=Homo sapiens OX=9606 GN=EEF2 PE=1 SV=4	P13639	0	2	1	0	1	1	720.351	1439.69	1439.69	2.37	0.0017	HCD (High Energy Collision Dissociation)	MS2	51.7945	100	74.7387	23266	190923L_SAM6048_BY19_CF_4.raw	F140		6.01	357.3	185.2	132.9	9.79484e-07	0.00029274	0.000273673	0	9.17348e-05	0.000789889	0.00062054	0.00103093	0	33	1
TRUE	High	PMI-Byonic (B7)	Unambiguous	[K].STLTDSLVcK.[A]	C9(diHexAz2Si)	1	P13639	Elongation factor 2 OS=Homo sapiens OX=9606 GN=EEF2 PE=1 SV=4	P13639	0	2	1	0	1	1	720.35	1439.69	1439.69	1.18	0.00085	HCD (High Energy Collision Dissociation)	MS2	60.1987	100	68.5007	19994	190923L_SAM6048_BY19_CF_3.raw	F141		4.92	358.7	101.2	61.8	1.21299e-05	0.000501756	0.00042508	0	0.00113486	0.000992802	0.000976086	0.00103093	0	33	1
TRUE	High	Sequest HT (A3)	Unambiguous	[K].STLTDSLVcK.[A]	C9(diHexAz2Si)	1	P13639	Elongation factor 2 OS=Homo sapiens OX=9606 GN=EEF2 PE=1 SV=4	P13639	0	2	0.1317	0	1	1	720.35	1439.69	1439.69	1.18	0.00085	HCD (High Energy Collision Dissociation)	MS2	60.1987	100	68.5007	19994	190923L_SAM6048_BY19_CF_3.raw	F141	2.43													0	0	1
TRUE	High	Sequest HT (A3)	Unambiguous	[K].STLTDSLVcK.[A]	C9(diHexAz2Si)	1	P13639	Elongation factor 2 OS=Homo sapiens OX=9606 GN=EEF2 PE=1 SV=4	P13639	0	2	0.2945	0	1	1	720.35	1439.69	1439.69	1.27	0.00091	HCD (High Energy Collision Dissociation)	MS2	25.3483	100	67.4751	19404	190923L_SAM6048_BY19_CF_3.raw	F141	2.75													0	0	1
TRUE	High	Sequest HT (A3)	Unambiguous	[K].STLTDSLVcK.[A]	C9(diHexAz2Si)	1	P13639	Elongation factor 2 OS=Homo sapiens OX=9606 GN=EEF2 PE=1 SV=4	P13639	0	2	0.2815	0	1	1	720.351	1439.69	1439.69	2.37	0.0017	HCD (High Energy Collision Dissociation)	MS2	51.7945	100	74.7387	23266	190923L_SAM6048_BY19_CF_4.raw	F140	2.38													0	0	1
TRUE	High	Sequest HT (A3)	Unambiguous	[K].STLTDSLVcK.[A]	C9(diHexAz2Si)	1	P13639	Elongation factor 2 OS=Homo sapiens OX=9606 GN=EEF2 PE=1 SV=4	P13639	0	2	0.2394	0	1	1	720.351	1439.7	1439.69	3.31	0.00239	HCD (High Energy Collision Dissociation)	MS2	61.5164	100	72.472	21936	190923L_SAM6048_BY19_CF_4.raw	F140	1.88													0	0	1
TRUE	High	PMI-Byonic (B7)	Unambiguous	[M].AcGLVASNLNLKPGEcLR.[V]	C2(diHexAz2Si); C16(Carbamidomethyl)	1	P09382	Galectin-1 OS=Homo sapiens OX=9606 GN=LGALS1 PE=1 SV=2	P09382	0	2	1	0	1	1	1144.57	2288.14	2288.13	1.4	0.0016	HCD (High Energy Collision Dissociation)	MS2	18.2389	100	78.4751	25673	190923L_SAM6048_BY19_CF_3.raw	F141		4.03	320.8	222.4	101.3	9.2299e-05	0.000501756	0.000369413	0.000878735	0.00857156	0.00285966	0.00284153	0.000865801	0	2	1
TRUE	High	PMI-Byonic (B7)	Unambiguous	[M].AcGLVASNLNLKPGEcLR.[V]	C2(diHexAz2Si); C16(Carbamidomethyl)	1	P09382	Galectin-1 OS=Homo sapiens OX=9606 GN=LGALS1 PE=1 SV=2	P09382	0	2	1	0	1	1	1144.57	2288.13	2288.13	-2.32	-0.00266	HCD (High Energy Collision Dissociation)	MS2	5.68584	100	84.9562	29303	190923L_SAM6048_BY19_CF_4.raw	F140		4.81	420.3	220.9	118.6	1.56542e-05	0.000501756	0.000415369	0.000878735	0.00146411	0.00120308	0.00119732	0.000865801	0	2	1
TRUE	High	PMI-Byonic (B7)	Unambiguous	[M].AcGLVASNLNLKPGEcLR.[V]	C2(diHexAz2Si); C16(Carbamidomethyl)	1	P09382	Galectin-1 OS=Homo sapiens OX=9606 GN=LGALS1 PE=1 SV=2	P09382	0	2	1	0	1	1	1144.57	2288.14	2288.13	0.53	0.0006	HCD (High Energy Collision Dissociation)	MS2	6.79293	100	79.5215	26284	190923L_SAM6048_BY19_CF_3.raw	F141		6.07	474.2	322	135.1	8.57111e-07	0.00029274	0.000278629	0.000878735	8.02747e-05	0.000789889	0.000631712	0.000865801	0	2	1
TRUE	High	PMI-Byonic (B7)	Unambiguous	[M].AcGLVASNLNLKPGEcLR.[V]	C2(diHexAz2Si); C16(Carbamidomethyl)	1	P09382	Galectin-1 OS=Homo sapiens OX=9606 GN=LGALS1 PE=1 SV=2	P09382	0	2	1	0	1	1	1144.57	2288.13	2288.13	-1.3	-0.00149	HCD (High Energy Collision Dissociation)	MS2	54.402	100	86.0456	29896	190923L_SAM6048_BY19_CF_4.raw	F140		2.8	311.4	109.6	82.5	0.00157142	0.00176339	0.00172766	0.000878735	0.129598	0.00900056	0.00897364	0.000865801	0	2	1
TRUE	High	PMI-Byonic (B7)	Unambiguous	[M].AcGLVASNLNLKPGEcLR.[V]	C2(diHexAz2Si); C16(Carbamidomethyl)	1	P09382	Galectin-1 OS=Homo sapiens OX=9606 GN=LGALS1 PE=1 SV=2	P09382	0	2	1	0	1	1	1144.57	2288.14	2288.13	1.71	0.00195	HCD (High Energy Collision Dissociation)	MS2	31.8229	100	80.5549	26852	190923L_SAM6048_BY19_CF_3.raw	F141		1.59	183.9	112.1	93.7	0.0257874	0.00303658	0.00303197	0.000878735	0.71656	0.0609004	0.0608629	0.000865801	0	2	1
TRUE	High	PMI-Byonic (B7)	Unambiguous	[M].AcARPLISVYSEK.[G]	C2(triHexAz2Si)	1	P36578	60S ribosomal protein L4 OS=Homo sapiens OX=9606 GN=RPL4 PE=1 SV=5	P36578	0	2	1	0	1	1	926.458	1851.91	1851.91	-1.76	-0.00163	HCD (High Energy Collision Dissociation)	MS2	54.9006	100	81.2022	27116	190923L_SAM6048_BY19_CF_4.raw	F140		1.82	225.4	68.2	66.6	0.0151207	0.00273342	0.00272089	0.00171429	0.596355	0.043878	0.0438144	0.00994475	0	2	1
TRUE	High	PMI-Byonic (B7)	Unambiguous	[M].AcARPLISVYSEK.[G]	C2(triHexAz2Si)	1	P36578	60S ribosomal protein L4 OS=Homo sapiens OX=9606 GN=RPL4 PE=1 SV=5	P36578	0	2	1	0	1	1	926.459	1851.91	1851.91	-0.82	-0.00076	HCD (High Energy Collision Dissociation)	MS2	47.5677	100	75.1649	23790	190923L_SAM6048_BY19_CF_3.raw	F141		2.91	270.1	108	80.5	0.00122386	0.00161316	0.00160411	0.00171429	0.104163	0.00830276	0.00826605	0.00994475	0	2	1
TRUE	High	PMI-Byonic (B7)	Unambiguous	[M].AcARPLISVYSEK.[G]	C2(triHexAz2Si)	1	P36578	60S ribosomal protein L4 OS=Homo sapiens OX=9606 GN=RPL4 PE=1 SV=5	P36578	0	2	1	0	1	1	926.457	1851.91	1851.91	-2.98	-0.00276	HCD (High Energy Collision Dissociation)	MS2	42.6881	100	77.3211	24998	190923L_SAM6048_BY19_CF_3.raw	F141		2.41	275.3	117.5	78	0.00385602	0.00186162	0.00180696	0.00171429	0.272204	0.0182107	0.0182011	0.00994475	0	2	1
TRUE	High	PMI-Byonic (B7)	Unambiguous	[M].AcGLVASNLNLKPGEcLR.[V]	C2(triHexAz2Si); C16(Carbamidomethyl)	1	P09382	Galectin-1 OS=Homo sapiens OX=9606 GN=LGALS1 PE=1 SV=2	P09382	0	2	1	0	1	1	1165.58	2330.15	2330.14	1.64	0.00191	HCD (High Energy Collision Dissociation)	MS2	14.368	100	92.1173	32631	190923L_SAM6048_BY19_CF_4.raw	F140		2.45	196.4	174.9	53.1	0.00357344	0.00186162	0.0018388	0.000894454	0.255286	0.0151239	0.0150854	0.000880282	0	2	1
TRUE	High	PMI-Byonic (B7)	Unambiguous	[M].AcGLVASNLNLKPGEcLR.[V]	C2(triHexAz2Si); C16(Carbamidomethyl)	1	P09382	Galectin-1 OS=Homo sapiens OX=9606 GN=LGALS1 PE=1 SV=2	P09382	0	2	1	0	1	1	1165.57	2330.14	2330.14	-1.93	-0.00225	HCD (High Energy Collision Dissociation)	MS2	45.2283	100	83.7226	28632	190923L_SAM6048_BY19_CF_3.raw	F141		6.14	489.3	379.1	139.2	7.19952e-07	0.000296384	0.00027972	0.000894454	6.78278e-05	0.000790826	0.000635728	0.000880282	0	2	1
TRUE	High	PMI-Byonic (B7)	Unambiguous	[M].AcGLVASNLNLKPGEcLR.[V]	C2(triHexAz2Si); C16(Carbamidomethyl)	1	P09382	Galectin-1 OS=Homo sapiens OX=9606 GN=LGALS1 PE=1 SV=2	P09382	0	2	1	0	1	1	1165.58	2330.16	2330.14	5.97	0.00696	HCD (High Energy Collision Dissociation)	MS2	17.9021	100	85.9832	29798	190923L_SAM6048_BY19_CF_3.raw	F141		5.75	492.6	374.1	131.2	1.79379e-06	0.000504923	0.000501882	0.000894454	0.000168978	0.000790826	0.000568343	0.000880282	0	2	1
